# Supplementary material for: Analysis of structure–activity and structure–mechanism relationships among thyroid stimulating hormone receptor binding chemicals by leveraging the ToxCast library
Source: RSC Adv. 2023 Aug 4;13(34):23461–71. doi: 10.1039/d3ra04452a (PMC10401517; doi:10.1039/d3ra04452a)
Supplement: RA-013-D3RA04452A-s001 [file RA-013-D3RA04452A-s001.xlsx]

## Sheet: Introduction
Supplementary Tables S1-S9 for Analysis of structure-activity and structure-mechanism relationships among thyroid stimulating hormone receptor binding chemicals by leveraging ToxCast library Ajaya Kumar Sahooa,b,1, Shanmuga Priya Baskarana,b,1, Nikhil Chivukulaa,b, Kishan Kumara, Areejit Samala,b,* aThe Institute of Mathematical Sciences (IMSc), Chennai 600113, India bHomi Bhabha National Institu…

## Sheet: Table S1
Table S1: Curated agonist dataset of 509 chemicals for thyroid stimulating hormone receptor (TSHR) from ToxCast chemical library. For each chemical, the table provides the CAS identifier or PubChem compound identifier (CID), chemical name, Canonical SMILES generated using RDKit, mechanism of action, modl_ga (logarithm of AC50 value in micromolar concentration) value, computed pAC50 value. Further…
Serial Number	Chemical Identifier	Chemical Name	Canonical SMILES	Mechanism of Action	modl_ga	pAC50	Chemical Class	Molecular Scaffold	Endocrine Disrupting Chemical	High Production Volume Chemical	Functional Use(s)	Product Use Composition(s)	Occupational Health Hazard Report(s)
1	CAS:309-00-2	Aldrin	ClC1=C(Cl)[C@@]2(C([C@@]1(Cl)[C@H]1[C@@H]2[C@H]2C[C@@H]1C=C2)(Cl)Cl)Cl	Active	1.04	4.96	Vinyl halides	C1=CC2CC1C1C3C=CC(C3)C21	yes
2	CAS:3775-55-1	2-Amino-5-(5-nitro-2-furyl)-1,3,4-oxadiazole	[O-][N+](=O)c1ccc(o1)c1nnc(o1)N	Inactive	0.81	5.19	Furans	c1coc(-c2nnco2)c1
3	CAS:68844-77-9	Astemizole	COc1ccc(cc1)CCN1CCC(CC1)Nc1nc2c(n1Cc1ccc(cc1)F)cccc2	Active	0.85	5.15	Benzimidazoles	c1ccc(CCN2CCC(Nc3nc4ccccc4n3Cc3ccccc3)CC2)cc1
4	CAS:123524-52-7	Azelnidipine	CC(OC(=O)C1=C(C)NC(=C(C1c1cccc(c1)[N+](=O)[O-])C(=O)OC1CN(C1)C(c1ccccc1)c1ccccc1)N)C	Active	1.13	4.87	Benzene and substituted derivatives	O=C(OC1CN(C(c2ccccc2)c2ccccc2)C1)C1=CNC=CC1c1ccccc1
5	CAS:98-07-7	Benzotrichloride	ClC(c1ccccc1)(Cl)Cl	Active	0.96	5.04	Benzene and substituted derivatives	c1ccccc1		yes		vehicle
6	CAS:80-05-7	Bisphenol A	CC(c1ccc(cc1)O)(c1ccc(cc1)O)C	Active	1.76	4.24	Benzene and substituted derivatives	c1ccc(Cc2ccccc2)cc1	yes	yes	binder	construction and building materials|furniture and furnishings|home maintenance
7	CAS:128-37-0	Butylated hydroxytoluene	Cc1cc(c(c(c1)C(C)(C)C)O)C(C)(C)C	Active	1.44	4.56	Benzene and substituted derivatives	c1ccccc1	yes	yes	UV stabilizer|antioxidant|defoamer|fragrance|preservative|processing aid not otherwise specified|stabilizing agent	arts and crafts/office supplies|cleaning products and household care|electronics/small appliances|manufactured formulations|other direct contact consumer goods|personal care|pesticides|vehicle	Emissions Generated from the Laser Marking of Different Products
8	CAS:58-08-2	Caffeine	Cn1cnc2c1c(=O)n(C)c(=O)n2C	Active	1.4	4.6	Imidazopyrimidines	O=c1[nH]c(=O)c2[nH]cnc2[nH]1	yes	yes	softener and conditioner	personal care
9	CAS:50-14-6	Ergocalciferol	O[C@H]1CCC(=C)/C(=C\C=C\2/CCC[C@]3([C@H]2CC[C@@H]3[C@@H](/C=C/[C@@H](C(C)C)C)C)C)/C1	Active	1.61	4.39	Steroids and steroid derivatives	C=C1CCCCC1=CC=C1CCCC2CCCC12				personal care
10	CAS:2425-06-1	Captafol	ClC(C(SN1C(=O)C2C(C1=O)CC=CC2)(Cl)Cl)Cl	Active	0.88	5.12	Isoindoles and derivatives	O=C1NC(=O)C2CC=CCC12	yes		biocide
11	CAS:133-06-2	Captan	ClC(SN1C(=O)C2C(C1=O)CC=CC2)(Cl)Cl	Active	1.25	4.75	Isoindoles and derivatives	O=C1NC(=O)C2CC=CCC12	yes		biocide	pesticides
12	CAS:474-25-9	Chenodeoxycholic acid	O[C@@H]1CC[C@]2([C@@H](C1)C[C@H]([C@@H]1[C@@H]2CC[C@]2([C@H]1CC[C@@H]2[C@@H](CCC(=O)O)C)C)O)C	Inactive	1.81	4.19	Steroids and steroid derivatives	C1CCC2C(C1)CCC1C3CCCC3CCC21
13	CAS:118-75-2	Chloranil	ClC1=C(Cl)C(=O)C(=C(C1=O)Cl)Cl	Active	1.59	4.41	Organooxygen compounds	O=C1C=CC(=O)C=C1
14	CAS:57-74-9	Chlordane	ClC1CC2C(C1Cl)C1(C(C2(Cl)C(=C1Cl)Cl)(Cl)Cl)Cl	Active	0.9	5.1	Vinyl halides	C1=CC2CC1C1CCCC21			biocide	pesticides
15	CAS:97-00-7	1-Chloro-2,4-dinitrobenzene	[O-][N+](=O)c1ccc(c(c1)[N+](=O)[O-])Cl	Active	0.92	5.08	Benzene and substituted derivatives	c1ccccc1		yes
16	CAS:532-27-4	2-Chloroacetophenone	ClCC(=O)c1ccccc1	Active	1.57	4.43	Organooxygen compounds	c1ccccc1
17	CAS:510-15-6	Chlorobenzilate	CCOC(=O)C(c1ccc(cc1)Cl)(c1ccc(cc1)Cl)O	Active	1.62	4.38	Benzene and substituted derivatives	c1ccc(Cc2ccccc2)cc1
18	CAS:117279-73-9	Israpafant	CC(Cc1ccc(cc1)CCc1sc2-n3c(C)nnc3C(N=C(c2c1)c1ccccc1Cl)C)C	Active	1.3	4.7	Thienodiazepines	c1ccc(CCc2cc3c(s2)-n2cnnc2CN=C3c2ccccc2)cc1
19	CAS:1897-45-6	Chlorothalonil	N#Cc1c(Cl)c(C#N)c(c(c1Cl)Cl)Cl	Active	0.6	5.4	Benzene and substituted derivatives	c1ccccc1	yes	yes	biocide|preservative	home maintenance|laboratory supplies|pesticides
20	CAS:53-19-0	o,p'-DDD	ClC(C(c1ccccc1Cl)c1ccc(cc1)Cl)Cl	Active	0.71	5.29	Benzene and substituted derivatives	c1ccc(Cc2ccccc2)cc1	yes
21	CAS:95-80-7	2,4-Diaminotoluene	Nc1ccc(c(c1)N)C	Inactive	1.57	4.43	Benzene and substituted derivatives	c1ccccc1	yes	yes
22	CAS:60-57-1	Dieldrin	ClC1=C(Cl)[C@@]2(C([C@@]1(Cl)[C@H]1[C@@H]2[C@H]2C[C@@H]1[C@H]1[C@@H]2O1)(Cl)Cl)Cl	Active	0.57	5.43	Prenol lipids	C1=CC2CC1C1C3CC(C4OC34)C21	yes		biocide
23	CAS:56-53-1	Diethylstilbestrol	CC/C(=C(\c1ccc(cc1)O)/CC)/c1ccc(cc1)O	Active	1.77	4.23	Stilbenes	C(=Cc1ccccc1)c1ccccc1	yes
24	CAS:57-97-6	7,12-Dimethylbenz(a)anthracene	Cc1c2ccc3c(c2c(c2c1cccc2)C)cccc3	Active	1.39	4.61	Phenanthrenes and derivatives	c1ccc2cc3c(ccc4ccccc43)cc2c1	yes
25	CAS:74-31-7	N,N'-Diphenyl-p-phenylenediamine	c1ccc(cc1)Nc1ccc(cc1)Nc1ccccc1	Active	1.9	4.1	Benzene and substituted derivatives	c1ccc(Nc2ccc(Nc3ccccc3)cc2)cc1	yes	yes		arts and crafts/office supplies
26	CAS:115-29-7	Endosulfan	O=S1OCC2C(CO1)C1(C(C2(Cl)C(=C1Cl)Cl)(Cl)Cl)Cl	Active	0.69	5.31	Organic oxoanionic compounds	O=S1OCC2C3C=CC(C3)C2CO1	yes	yes	biocide
27	CAS:72-20-8	Endrin	ClC1=C(Cl)[C@@]2(C([C@@]1(Cl)[C@H]1[C@@H]2[C@@H]2C[C@H]1[C@@H]1[C@H]2O1)(Cl)Cl)Cl	Active	0.69	5.31	Prenol lipids	C1=CC2CC1C1C3CC(C4OC34)C21			biocide	landscape/yard
28	CAS:57-63-6	17alpha-Ethinylestradiol	C#C[C@]1(O)CC[C@@H]2[C@]1(C)CC[C@H]1[C@H]2CCc2c1ccc(c2)O	Active	1.23	4.77	Steroids and steroid derivatives	c1ccc2c(c1)CCC1C2CCC2CCCC21	yes
29	CAS:96-45-7	Ethylene thiourea	S=C1NCCN1	Active	1.23	4.77	Azolidines	S=C1NCCN1	yes			pesticides
30	CAS:126-07-8	Griseofulvin	COC1=CC(=O)C[C@H]([C@@]21Oc1c(C2=O)c(OC)cc(c1Cl)OC)C	Active	1.05	4.95	Benzofurans	O=C1C=CC2(CC1)Oc1ccccc1C2=O
31	CAS:76-44-8	Heptachlor	ClC1C=CC2C1C1(Cl)C(=C(C2(C1(Cl)Cl)Cl)Cl)Cl	Active	0.59	5.41	Vinyl halides	C1=CC2C3C=CC(C3)C2C1	yes		biocide	landscape/yard
32	CAS:319-84-6	alpha-1,2,3,4,5,6-Hexachlorocyclohexane	Cl[C@@H]1[C@H](Cl)[C@@H](Cl)[C@H]([C@@H]([C@H]1Cl)Cl)Cl	Active	1.15	4.85	Alkyl halides	C1CCCCC1			biocide
33	CAS:58-89-9	Lindane	Cl[C@@H]1[C@H](Cl)[C@@H](Cl)[C@@H]([C@@H]([C@H]1Cl)Cl)Cl	Active	0.86	5.14	Alkyl halides	C1CCCCC1	yes	yes	biocide	landscape/yard|personal care|pesticides
34	CAS:608-73-1	1,2,3,4,5,6-Hexachlorocyclohexane	ClC1C(Cl)C(Cl)C(C(C1Cl)Cl)Cl	Active	1.41	4.59	Alkyl halides	C1CCCCC1
35	CAS:123-31-9	Hydroquinone	Oc1ccc(cc1)O	Inactive	1.38	4.62	Phenols	c1ccccc1		yes	antioxidant|dye|fragrance|reducing agent	arts and crafts/office supplies|cleaning products and household care|cons. electronics, mech. appliances, and machinery|electronics/small appliances|home maintenance|medical/dental|personal care	Emissions Generated from the Laser Marking of Different Products|Hazard Evaluation and Technical Assistance Report No. 93-367-2321
36	CAS:103-16-2	4-(Benzyloxyl)phenol	Oc1ccc(cc1)OCc1ccccc1	Active	1.42	4.58	Phenols	c1ccc(COc2ccccc2)cc1
37	CAS:143-50-0	Kepone	O=C1C2(Cl)C3(C4(C1(Cl)C1(C2(C3(Cl)C(C41Cl)(Cl)Cl)Cl)Cl)Cl)Cl	Active	1.68	4.32	Prenol lipids	O=C1C2C3C4CC5C3C1C5C42	yes
38	CAS:72-33-3	Mestranol	C#C[C@]1(O)CC[C@@H]2[C@]1(C)CC[C@H]1[C@H]2CCc2c1ccc(c2)OC	Active	1.11	4.89	Steroids and steroid derivatives	c1ccc2c(c1)CCC1C2CCC2CCCC21
39	CAS:934-00-9	3-Methoxycatechol	COc1cccc(c1O)O	Inactive	1.77	4.23	Phenols	c1ccccc1
40	CAS:452-86-8	4-Methylcatechol	Cc1ccc(c(c1)O)O	Inactive	1.93	4.07	Phenols	c1ccccc1
41	CAS:119-47-1	2,2'-Methylenebis(4-methyl-6-tert-butylphenol)	Cc1cc(Cc2cc(C)cc(c2O)C(C)(C)C)c(c(c1)C(C)(C)C)O	Active	1.49	4.51	Benzene and substituted derivatives	c1ccc(Cc2ccccc2)cc1		yes	antioxidant|fragrance	electronics/small appliances|home maintenance|vehicle
42	CAS:315-18-4	Mexacarbate	CNC(=O)Oc1cc(C)c(c(c1)C)N(C)C	Active	1.78	4.22	Benzene and substituted derivatives	c1ccccc1
43	CAS:59-87-0	Nitrofurazone	NC(=O)NN=Cc1ccc(o1)[N+](=O)[O-]	Active	1.27	4.73	Furans	c1ccoc1			biocide
44	CAS:92-55-7	5-Nitro-2-furanmethanediol diacetate	CC(=O)OC(c1ccc(o1)[N+](=O)[O-])OC(=O)C	Active	1.5	4.5	Furans	c1ccoc1
45	CAS:99-56-9	4-Nitro-1,2-phenylenediamine	[O-][N+](=O)c1ccc(c(c1)N)N	Active	1.55	4.45	Benzene and substituted derivatives	c1ccccc1
46	CAS:62-23-7	4-Nitrobenzoic acid	OC(=O)c1ccc(cc1)[N+](=O)[O-]	Active	1.51	4.49	Benzene and substituted derivatives	c1ccccc1		yes
47	CAS:156-10-5	4-Nitrosodiphenylamine	O=Nc1ccc(cc1)Nc1ccccc1	Active	0.59	5.41	Benzene and substituted derivatives	c1ccc(Nc2ccccc2)cc1
48	CAS:92-84-2	Phenothiazine	c1ccc2c(c1)Sc1c(N2)cccc1	Active	1.62	4.38	Benzothiazines	c1ccc2c(c1)Nc1ccccc1S2		yes
49	CAS:135-88-6	N-Phenyl-2-naphthylamine	c1ccc(cc1)Nc1ccc2c(c1)cccc2	Active	1.71	4.29	Naphthalenes	c1ccc(Nc2ccc3ccccc3c2)cc1
50	CAS:62-38-4	Phenylmercuric acetate	CC(=O)O[Hg]c1ccccc1	Active	0.71	5.29	Benzene and substituted derivatives	c1ccccc1	yes	yes	preservative	home maintenance|pesticides
51	CAS:58-14-0	Pyrimethamine	CCc1nc(N)nc(c1c1ccc(cc1)Cl)N	Active	1.49	4.51	Diazines	c1ccc(-c2cncnc2)cc1
52	CAS:50-55-5	Reserpine	COc1ccc2c(c1)[nH]c1c2CCN2[C@@H]1C[C@H]1[C@@H](C2)C[C@H]([C@@H]([C@H]1C(=O)OC)OC)OC(=O)c1cc(OC)c(c(c1)OC)OC	Active	1.27	4.73	Yohimbine alkaloids	O=C(OC1CCC2CC3c4[nH]c5ccccc5c4CCN3CC2C1)c1ccccc1	yes
53	CAS:302-79-4	all-trans-Retinoic acid	C/C(=C\C=C\C(=C\C(=O)O)\C)/C=C/C1=C(C)CCCC1(C)C	Active	1.89	4.11	Prenol lipids	C1=CCCCC1
54	CAS:83-79-4	Rotenone	COc1cc2c(cc1OC)OC[C@@H]1[C@H]2C(=O)c2c(O1)c1C[C@@H](Oc1cc2)C(=C)C	Active	1.46	4.54	Isoflavonoids	O=C1c2ccc3c(c2OC2COc4ccccc4C12)CCO3			biocide
55	CAS:18559-94-9	Albuterol	OCc1cc(ccc1O)C(CNC(C)(C)C)O	Active	-1.36	7.36	Benzene and substituted derivatives	c1ccccc1
56	CAS:533-31-3	Sesamol	Oc1ccc2c(c1)OCO2	Inactive	-0.45	6.45	Benzodioxoles	c1ccc2c(c1)OCO2
57	CID:22833294	Strobane	ClC1[C@]2(Cl)C(C(=C)[C@@]1(Cl)C(C2(Cl)Cl)(Cl)Cl)(C)C	Active	1.17	4.83	Prenol lipids	C=C1CC2CCC1C2
58	CAS:96-69-5	4,4'-Thiobis(6-tert-butyl-m-cresol)	CC(c1cc(Sc2cc(c(cc2C)O)C(C)(C)C)c(cc1O)C)(C)C	Active	1.1	4.9	Thioethers	c1ccc(Sc2ccccc2)cc1		yes
59	CID:5284469	Toxaphene	ClCC1(CCl)C(=C)C2(C(C1(Cl)C(C2Cl)Cl)(Cl)Cl)Cl	Active	1.16	4.84	Prenol lipids	C=C1CC2CCC1C2	yes		biocide
60	CAS:133-07-3	Folpet	ClC(SN1C(=O)c2c(C1=O)cccc2)(Cl)Cl	Active	1.14	4.86	Isoindoles and derivatives	O=C1NC(=O)c2ccccc21	yes		biocide	home maintenance|manufactured formulations
61	CID:6529	Tris(methylphenyl) phosphate	Cc1ccc(cc1)OP(=O)(Oc1ccc(cc1)C)Oc1ccc(cc1)C	Active	1.28	4.72	Organic phosphoric acids and derivatives	O=P(Oc1ccccc1)(Oc1ccccc1)Oc1ccccc1		yes		manufactured formulations|vehicle
62	CAS:1582-09-8	Trifluralin	CCCN(c1c(cc(cc1[N+](=O)[O-])C(F)(F)F)[N+](=O)[O-])CCC	Active	0.74	5.26	Benzene and substituted derivatives	c1ccccc1	yes	yes	biocide	landscape/yard
63	CAS:112665-43-7	(+-)-7-(3,5,6-trimethyl-1,4-benzoquinon-2-yl)-7-phenylheptanoic acid	OC(=O)CCCCCC(C1=C(C)C(=O)C(=C(C1=O)C)C)c1ccccc1	Inactive	1.35	4.65	Neoflavonoids	O=C1C=CC(=O)C(Cc2ccccc2)=C1
64	CAS:81-15-2	2,4,6-Trinitro-1,3-dimethyl-5-tert-butylbenzene	[O-][N+](=O)c1c(C)c([N+](=O)[O-])c(c(c1C(C)(C)C)[N+](=O)[O-])C	Active	1.87	4.13	Benzene and substituted derivatives	c1ccccc1		yes
65	CAS:900-95-8	Triphenyltin acetate	CC(=O)O[Sn](c1ccccc1)(c1ccccc1)c1ccccc1	Active	-0.99	6.99	Benzene and substituted derivatives	c1ccc([SnH](c2ccccc2)c2ccccc2)cc1	yes
66	CAS:76-87-9	Triphenyltin hydroxide	O[Sn](c1ccccc1)(c1ccccc1)c1ccccc1	Active	-0.64	6.64	Benzene and substituted derivatives	c1ccc([SnH](c2ccccc2)c2ccccc2)cc1	yes		biocide
67	CAS:52-76-6	Lynestrenol	C#C[C@@]1(O)CC[C@@H]2[C@]1(C)CC[C@H]1[C@H]2CCC2=CCCC[C@H]12	Active	1.2	4.8	Steroids and steroid derivatives	C1=C2CCC3C4CCCC4CCC3C2CCC1
68	CAS:122-78-1	Phenylacetaldehyde	O=CCc1ccccc1	Active	1.59	4.41	Benzene and substituted derivatives	c1ccccc1			fragrance	cleaning products and household care|vehicle
69	CAS:719-22-2	2,6-Bis-(1,1-dimethylethyl)-2,5-cyclohexadiene-1,4-dione	O=C1C=C(C(=O)C(=C1)C(C)(C)C)C(C)(C)C	Inactive	1.48	4.52	Prenol lipids	O=C1C=CC(=O)C=C1
70	CAS:58-27-5	Menadione	O=C1C=C(C)C(=O)c2c1cccc2	Active	0.12	5.88	Naphthalenes	O=C1C=CC(=O)c2ccccc21
71	CAS:79-95-8	2,2',6,6'-Tetrachlorobisphenol A	CC(c1cc(Cl)c(c(c1)Cl)O)(c1cc(Cl)c(c(c1)Cl)O)C	Inactive	1.66	4.34	Benzene and substituted derivatives	c1ccc(Cc2ccccc2)cc1	yes
72	CAS:80-46-6	4-(2-Methylbutan-2-yl)phenol	CCC(c1ccc(cc1)O)(C)C	Active	1.68	4.32	Benzene and substituted derivatives	c1ccccc1	yes	yes	other	cleaning products and household care|home maintenance|personal care
73	CAS:84-62-8	Diphenyl phthalate	O=C(c1ccccc1C(=O)Oc1ccccc1)Oc1ccccc1	Active	1.08	4.92	Depsides and depsidones	O=C(Oc1ccccc1)c1ccccc1C(=O)Oc1ccccc1
74	CAS:100-25-4	1,4-Dinitrobenzene	[O-][N+](=O)c1ccc(cc1)[N+](=O)[O-]	Active	1.79	4.21	Benzene and substituted derivatives	c1ccccc1
75	CAS:115-86-6	Triphenyl phosphate	O=P(Oc1ccccc1)(Oc1ccccc1)Oc1ccccc1	Active	1.12	4.88	Organic phosphoric acids and derivatives	O=P(Oc1ccccc1)(Oc1ccccc1)Oc1ccccc1	yes	yes	binder|plasticizer|processing aid not otherwise specified	furniture and furnishings|home maintenance|laboratory supplies|personal care|vehicle	Evaluation of Exposure to Metals, Flame Retardants, and Nanomaterials at an Electronics Recycling Company
76	CAS:121-73-3	1-Chloro-3-nitrobenzene	Clc1cccc(c1)[N+](=O)[O-]	Active	0.81	5.19	Benzene and substituted derivatives	c1ccccc1		yes
77	CAS:1689-82-3	p-Phenylazophenol	Oc1ccc(cc1)/N=N/c1ccccc1	Active	1.69	4.31	Azobenzenes	c1ccc(N=Nc2ccccc2)cc1	yes
78	CAS:2104-64-5	EPN	CCOP(=S)(c1ccccc1)Oc1ccc(cc1)[N+](=O)[O-]	Inactive	1.6	4.4	Benzene and substituted derivatives	S=[PH](Oc1ccccc1)c1ccccc1	yes
79	CAS:15972-60-8	Alachlor	COCN(c1c(CC)cccc1CC)C(=O)CCl	Active	1.81	4.19	Benzene and substituted derivatives	c1ccccc1	yes	yes	biocide	landscape/yard
80	CAS:26538-44-3	Zearalanol	O[C@@H]1CCCCCc2cc(O)cc(c2C(=O)O[C@H](CCC1)C)O	Active	1.66	4.34	Macrolides and analogues	O=C1OCCCCCCCCCCc2ccccc21	yes
81	CAS:2971-36-0	2,2-Bis(4-hydroxyphenyl)-1,1,1-trichloroethane	ClC(C(c1ccc(cc1)O)c1ccc(cc1)O)(Cl)Cl	Active	1.63	4.37	Benzene and substituted derivatives	c1ccc(Cc2ccccc2)cc1	yes
82	CAS:789-02-6	o,p'-DDT	Clc1ccc(cc1)C(C(Cl)(Cl)Cl)c1ccccc1Cl	Active	0.5	5.5	Benzene and substituted derivatives	c1ccc(Cc2ccccc2)cc1	yes		biocide
83	CAS:140-66-9	4-(1,1,3,3-Tetramethylbutyl)phenol	CC(c1ccc(cc1)O)(CC(C)(C)C)C	Active	1.29	4.71	Benzene and substituted derivatives	c1ccccc1	yes	yes
84	CAS:58-22-0	Testosterone	O=C1CC[C@]2(C(=C1)CC[C@@H]1[C@@H]2CC[C@]2([C@H]1CC[C@@H]2O)C)C	Inactive	1.81	4.19	Steroids and steroid derivatives	O=C1C=C2CCC3C4CCCC4CCC3C2CC1
85	CAS:68047-06-3	(Z)-4-Hydroxytamoxifen	CC/C(=C(\c1ccc(cc1)O)/c1ccc(cc1)OCCN(C)C)/c1ccccc1	Active	1.5	4.5	Stilbenes	C(=C(c1ccccc1)c1ccccc1)c1ccccc1	yes
86	CAS:77-40-7	Bisphenol B	CCC(c1ccc(cc1)O)(c1ccc(cc1)O)C	Active	1.84	4.16	Benzene and substituted derivatives	c1ccc(Cc2ccccc2)cc1	yes
87	CAS:51218-45-2	Metolachlor	COCC(N(c1c(C)cccc1CC)C(=O)CCl)C	Active	1.67	4.33	Benzene and substituted derivatives	c1ccccc1		yes	biocide
88	CAS:14868-03-2	Bis(4-hydroxyphenyl)-2,2-dichloroethylene	ClC(=C(c1ccc(cc1)O)c1ccc(cc1)O)Cl	Active	1.69	4.31	Benzene and substituted derivatives	C=C(c1ccccc1)c1ccccc1	yes
89	CAS:104-43-8	4-Dodecylphenol	CCCCCCCCCCCCc1ccc(cc1)O	Active	1.35	4.65	Phenols	c1ccccc1	yes
90	CAS:599-64-4	4-Cumylphenol	Oc1ccc(cc1)C(c1ccccc1)(C)C	Active	1.64	4.36	Benzene and substituted derivatives	c1ccc(Cc2ccccc2)cc1		yes
91	CAS:61-19-8	Adenosine 5'-phosphate	O[C@@H]1[C@H](O)[C@H](O[C@H]1n1cnc2c1ncnc2N)COP(=O)(O)O	Inactive	1.54	4.46	Purine nucleotides	c1ncc2ncn(C3CCCO3)c2n1
92	CAS:1951-25-3	Amiodarone	CCCCc1oc2c(c1C(=O)c1cc(I)c(c(c1)I)OCCN(CC)CC)cccc2	Inactive	1.28	4.72	Organooxygen compounds	O=C(c1ccccc1)c1coc2ccccc12
93	CAS:60719-84-8	Amrinone	O=c1[nH]cc(cc1N)c1ccncc1	Inactive	1.14	4.86	Pyridines and derivatives	O=c1ccc(-c2ccncc2)c[nH]1
94	CAS:58-00-4	Apomorphine	CN1CCc2c3[C@H]1Cc1ccc(c(c1-c3ccc2)O)O	Active	1.62	4.38	Aporphines	c1ccc2c(c1)CC1NCCc3cccc-2c31
95	CAS:30392-40-6	Bitolterol	Cc1ccc(cc1)C(=O)Oc1cc(ccc1OC(=O)c1ccc(cc1)C)C(CNC(C)(C)C)O	Active	-1.18	7.18	Depsides and depsidones	O=C(Oc1ccccc1OC(=O)c1ccccc1)c1ccccc1
96	CAS:62658-63-3	Bopindolol	O=C(c1ccccc1)OC(COc1cccc2c1cc([nH]2)C)CNC(C)(C)C	Active	1.3	4.7	Benzene and substituted derivatives	O=C(OCCOc1cccc2[nH]ccc12)c1ccccc1
97	CAS:169590-42-5	Celecoxib	Cc1ccc(cc1)c1cc(nn1c1ccc(cc1)S(=O)(=O)N)C(F)(F)F	Active	1.62	4.38	Azoles	c1ccc(-c2ccnn2-c2ccccc2)cc1
98	CAS:37148-27-9	Clenbuterol	OC(c1cc(Cl)c(c(c1)Cl)N)CNC(C)(C)C	Active	-2.88	8.88	Benzene and substituted derivatives	c1ccccc1
99	CAS:911-45-5	Clomiphene	CCN(CCOc1ccc(cc1)C(=C(c1ccccc1)Cl)c1ccccc1)CC	Inactive	1.52	4.48	Stilbenes	C(=C(c1ccccc1)c1ccccc1)c1ccccc1
100	CAS:17230-88-5	Danazol	C#C[C@]1(O)CC[C@@H]2[C@]1(C)CC[C@H]1[C@H]2CCC2=Cc3c(C[C@]12C)cno3	Active	1.33	4.67	Steroids and steroid derivatives	C1=C2CCC3C4CCCC4CCC3C2Cc2cnoc21
101	CAS:363-24-6	Dinoprostone	CCCCC[C@@H](/C=C/[C@H]1[C@H](O)CC(=O)[C@@H]1C/C=C\CCCC(=O)O)O	Active	-1.19	7.19	Fatty Acyls	O=C1CCCC1
102	CAS:51-43-4	Epinephrine	CNC[C@@H](c1ccc(c(c1)O)O)O	Active	0.34	5.66	Phenols	c1ccccc1
103	CAS:313-06-4	Estradiol cypionate	O=C(O[C@H]1CC[C@@H]2[C@]1(C)CC[C@H]1[C@H]2CCc2c1ccc(c2)O)CCC1CCCC1	Inactive	1.2	4.8	Steroids and steroid derivatives	O=C(CCC1CCCC1)OC1CCC2C1CCC1c3ccccc3CCC12
104	CAS:965-90-2	Ethylestrenol	CC[C@]1(O)CC[C@@H]2[C@]1(C)CC[C@H]1[C@H]2CCC2=CCCC[C@H]12	Active	1.2	4.8	Steroids and steroid derivatives	C1=C2CCC3C4CCCC4CCC3C2CCC1
105	CAS:72509-76-3	Felodipine	CCOC(=O)C1=C(C)NC(=C(C1c1cccc(c1Cl)Cl)C(=O)OC)C	Inactive	1.39	4.61	Pyridines and derivatives	C1=CC(c2ccccc2)C=CN1
106	CAS:16320-04-0	Gestrinone	CC[C@]12C=CC3=C4CCC(=O)C=C4CC[C@H]3[C@@H]1CC[C@@]2(O)C#C	Active	1.31	4.69	Steroids and steroid derivatives	O=C1C=C2CCC3C(=C2CC1)C=CC1CCCC13
107	CAS:7683-59-2	Isoproterenol	CC(NCC(c1ccc(c(c1)O)O)O)C	Active	-2.13	8.13	Phenols	c1ccccc1
108	CAS:4759-48-2	13-cis Retinoic acid	C/C(=C\C=C\C(=C/C(=O)O)\C)/C=C/C1=C(C)CCCC1(C)C	Active	1.07	4.93	Prenol lipids	C1=CCCCC1
109	CAS:103577-45-3	Lansoprazole	O=S(c1nc2c([nH]1)cccc2)Cc1nccc(c1C)OCC(F)(F)F	Inactive	1.35	4.65	Benzimidazoles	O=S(Cc1ccccn1)c1nc2ccccc2[nH]1
110	CAS:152-02-3	Levallorphan	C=CCN1CC[C@@]23[C@H]([C@H]1Cc1c3cc(cc1)O)CCCC2	Inactive	1.19	4.81	Morphinans	c1ccc2c(c1)CC1NCCC23CCCCC13
111	CAS:50-37-3	Lysergide	CCN(C(=O)[C@H]1CN(C)[C@H]2C(=C1)c1cccc3c1c(C2)c[nH]3)CC	Active	1.99	4.01	Ergoline and derivatives	C1=C2c3cccc4[nH]cc(c34)CC2NCC1
112	CAS:481-85-6	Menadiol	Oc1cc(C)c(c2c1cccc2)O	Inactive	0.06	5.94	Naphthalenes	c1ccc2ccccc2c1
113	CAS:29216-28-2	Mequitazine	c1ccc2c(c1)N(CC1CN3CCC1CC3)c1c(S2)cccc1	Active	0.67	5.33	Benzothiazines	c1ccc2c(c1)Sc1ccccc1N2CC1CN2CCC1CC2
114	CAS:78415-72-2	Milrinone	N#Cc1cc(c2ccncc2)c([nH]c1=O)C	Active	1.02	4.98	Pyridines and derivatives	O=c1ccc(-c2ccncc2)c[nH]1
115	CAS:83919-23-7	Mometasone furoate	ClCC(=O)[C@@]1(OC(=O)c2ccco2)[C@H](C)C[C@@H]2[C@]1(C)C[C@H](O)[C@]1([C@H]2CCC2=CC(=O)C=C[C@]12C)Cl	Inactive	1.34	4.66	Steroids and steroid derivatives	O=C1C=CC2C(=C1)CCC1C2CCC2C(OC(=O)c3ccco3)CCC21
116	CAS:55985-32-5	Nicardipine	COC(=O)C1=C(C)NC(=C(C1c1cccc(c1)[N+](=O)[O-])C(=O)OCCN(Cc1ccccc1)C)C	Active	1.63	4.37	Pyridines and derivatives	O=C(OCCNCc1ccccc1)C1=CNC=CC1c1ccccc1
117	CAS:63675-72-9	Nisoldipine	COC(=O)C1=C(C)NC(=C(C1c1ccccc1[N+](=O)[O-])C(=O)OCC(C)C)C	Active	1.92	4.08	Pyridines and derivatives	C1=CC(c2ccccc2)C=CN1
118	CAS:51-41-2	Norepinephrine	NC[C@@H](c1ccc(c(c1)O)O)O	Active	1.55	4.45	Phenols	c1ccccc1
119	CAS:68-22-4	Norethindrone	C#C[C@]1(O)CC[C@@H]2[C@]1(C)CC[C@H]1[C@H]2CCC2=CC(=O)CC[C@H]12	Active	1.79	4.21	Steroids and steroid derivatives	O=C1C=C2CCC3C4CCCC4CCC3C2CC1
120	CAS:447-41-6	Nylidrin	CC(NC(C(c1ccc(cc1)O)O)C)CCc1ccccc1	Inactive	-0.21	6.21	Benzene and substituted derivatives	c1ccc(CCCNCCc2ccccc2)cc1
121	CAS:61869-08-7	Paroxetine	Fc1ccc(cc1)[C@@H]1CCNC[C@H]1COc1ccc2c(c1)OCO2	Active	1.23	4.77	Piperidines	c1ccc(C2CCNCC2COc2ccc3c(c2)OCO3)cc1	yes
122	CAS:59-96-1	Phenoxybenzamine	ClCCN(C(COc1ccccc1)C)Cc1ccccc1	Active	1.45	4.55	Benzene and substituted derivatives	c1ccc(CNCCOc2ccccc2)cc1
123	CAS:60-87-7	Promethazine	CN(C(CN1c2ccccc2Sc2c1cccc2)C)C	Inactive	1.61	4.39	Benzothiazines	c1ccc2c(c1)Nc1ccccc1S2
124	CAS:68-26-8	Retinol	OC/C=C(/C=C/C=C(/C=C/C1=C(C)CCCC1(C)C)\C)\C	Active	1.58	4.42	Prenol lipids	C1=CCCCC1				personal care
125	CAS:50679-08-8	Terfenadine	OC(c1ccc(cc1)C(C)(C)C)CCCN1CCC(CC1)C(c1ccccc1)(c1ccccc1)O	Active	0.4	5.6	Benzene and substituted derivatives	c1ccc(CCCCN2CCC(C(c3ccccc3)c3ccccc3)CC2)cc1
126	CAS:82-99-5	Thiphenamil	CCN(CCSC(=O)C(c1ccccc1)c1ccccc1)CC	Inactive	1.35	4.65	Benzene and substituted derivatives	c1ccc(Cc2ccccc2)cc1
127	CAS:24237-54-5	Tinoridine	CCOC(=O)c1c(N)sc2c1CCN(C2)Cc1ccccc1	Inactive	1.31	4.69	Thienopyridines	c1ccc(CN2CCc3ccsc3C2)cc1
128	CAS:97322-87-7	Troglitazone	O=C1NC(=O)C(S1)Cc1ccc(cc1)OCC1(C)CCc2c(O1)c(C)c(c(c2C)O)C	Active	1.75	4.25	Benzopyrans	O=C1NC(=O)C(Cc2ccc(OCC3CCc4ccccc4O3)cc2)S1
129	CAS:42971-09-5	Vinpocetine	CCOC(=O)C1=C[C@]2(CC)CCCN3[C@@H]2c2n1c1ccccc1c2CC3	Active	1.56	4.44	Eburnan-type alkaloids	C1=Cn2c3c(c4ccccc42)CCN2CCCC1C32
130	CAS:4097-22-7	2',3'-Dideoxyadenosine	OC[C@@H]1CC[C@@H](O1)n1cnc2c1ncnc2N	Inactive	1.25	4.75	Purine nucleosides	c1ncc2ncn(C3CCCO3)c2n1
131	CAS:74115-24-5	Clofentezine	Clc1ccccc1c1nnc(nn1)c1ccccc1Cl	Active	0.41	5.59	Benzene and substituted derivatives	c1ccc(-c2nnc(-c3ccccc3)nn2)cc1			biocide
132	CAS:43121-43-3	Triadimefon	O=C(C(C)(C)C)C(n1ncnc1)Oc1ccc(cc1)Cl	Active	1.75	4.25	Phenol ethers	c1ccc(OCn2cncn2)cc1	yes	yes	biocide	cleaning products and household care|personal care|pesticides
133	CAS:1861-40-1	Benfluralin	CCCCN(c1c(cc(cc1[N+](=O)[O-])C(F)(F)F)[N+](=O)[O-])CC	Active	0.72	5.28	Benzene and substituted derivatives	c1ccccc1				landscape/yard|personal care
134	CAS:119-93-7	3,3'-Dimethylbenzidine	Nc1ccc(cc1C)c1ccc(c(c1)C)N	Active	0.13	5.87	Benzene and substituted derivatives	c1ccc(-c2ccccc2)cc1				furniture and furnishings
135	CAS:528-29-0	1,2-Dinitrobenzene	[O-][N+](=O)c1ccccc1[N+](=O)[O-]	Inactive	0.88	5.12	Benzene and substituted derivatives	c1ccccc1
136	CAS:56425-91-3	Flurprimidol	CC(C(c1cncnc1)(c1ccc(cc1)OC(F)(F)F)O)C	Active	1.61	4.39	Benzene and substituted derivatives	c1ccc(Cc2cncnc2)cc1
137	CAS:1024-57-3	Heptachlor epoxide	ClC1C2OC2C2C1C1(Cl)C(=C(C2(C1(Cl)Cl)Cl)Cl)Cl	Active	0.62	5.38	Oxanes	C1=CC2CC1C1CC3OC3C21				landscape/yard
138	CAS:319-86-8	delta-Hexachlorocyclohexane	Cl[C@@H]1[C@H](Cl)[C@H](Cl)[C@H]([C@@H]([C@H]1Cl)Cl)Cl	Active	1.68	4.32	Alkyl halides	C1CCCCC1				laboratory supplies
139	CAS:33820-53-0	Isopropalin	CCCN(c1c(cc(cc1[N+](=O)[O-])C(C)C)[N+](=O)[O-])CCC	Active	0.75	5.25	Benzene and substituted derivatives	c1ccccc1
140	CAS:330-55-2	Linuron	CON(C(=O)Nc1ccc(c(c1)Cl)Cl)C	Active	1.7	4.3	Benzene and substituted derivatives	c1ccccc1	yes	yes
141	CAS:15299-99-7	Napropamide	CCN(C(=O)C(Oc1cccc2c1cccc2)C)CC	Active	1.56	4.44	Naphthalenes	c1ccc2ccccc2c1	yes
142	CAS:19044-88-3	Oryzalin	CCCN(c1c(cc(cc1[N+](=O)[O-])S(=O)(=O)N)[N+](=O)[O-])CCC	Active	1.44	4.56	Benzene and substituted derivatives	c1ccccc1				landscape/yard|personal care
143	CAS:67747-09-5	Prochloraz	CCCN(C(=O)n1cncc1)CCOc1c(Cl)cc(cc1Cl)Cl	Active	1.61	4.39	Phenol ethers	O=C(NCCOc1ccccc1)n1ccnc1	yes	yes	biocide
144	CAS:2312-35-8	Propargite	C#CCOS(=O)OC1CCCCC1Oc1ccc(cc1)C(C)(C)C	Active	1.09	4.91	Benzene and substituted derivatives	c1ccc(OC2CCCCC2)cc1		yes	biocide
145	CAS:6219-89-2	4-Amino-4'-hydroxy-3-methyldiphenylamine	Oc1ccc(cc1)Nc1ccc(c(c1)C)N	Inactive	0.92	5.08	Benzene and substituted derivatives	c1ccc(Nc2ccccc2)cc1
146	CAS:2835-95-2	5-Amino-2-methylphenol	Nc1ccc(c(c1)O)C	Inactive	1.11	4.89	Phenols	c1ccccc1				personal care
147	CAS:123-30-8	4-Aminophenol	Nc1ccc(cc1)O	Inactive	1.49	4.51	Benzene and substituted derivatives	c1ccccc1	yes	yes		personal care
148	CAS:1675-54-3	Bisphenol A diglycidyl ether	CC(c1ccc(cc1)OCC1OC1)(c1ccc(cc1)OCC1OC1)C	Active	1.9	4.1	Benzene and substituted derivatives	c1cc(OCC2CO2)ccc1Cc1ccc(OCC2CO2)cc1	yes	yes		arts and crafts/office supplies|home maintenance
149	CID:158333	tert-Butylphenyl diphenyl phosphate	O=P(Oc1ccccc1C(C)(C)C)(Oc1ccccc1)Oc1ccccc1	Active	1.26	4.74	Organic phosphoric acids and derivatives	O=P(Oc1ccccc1)(Oc1ccccc1)Oc1ccccc1		yes		vehicle
150	CID:6528	Cresyl diphenyl phosphate	Cc1ccc(cc1)OP(=O)(Oc1ccccc1)Oc1ccccc1	Active	1.23	4.77	Organic phosphoric acids and derivatives	O=P(Oc1ccccc1)(Oc1ccccc1)Oc1ccccc1		yes
151	CAS:1552-42-7	Crystal Violet lactone	CN(c1ccc(cc1)C1(OC(=O)c2c1ccc(c2)N(C)C)c1ccc(cc1)N(C)C)C	Inactive	0.8	5.2	Benzofurans	O=C1OC(c2ccccc2)(c2ccccc2)c2ccccc21		yes
152	CAS:80-15-9	Cumene hydroperoxide	OOC(c1ccccc1)(C)C	Active	1.8	4.2	Benzene and substituted derivatives	c1ccccc1		yes		home maintenance|personal care|vehicle
153	CAS:3322-93-8	1,2-Dibromo-4-(1,2-dibromoethyl)cyclohexane	BrCC(C1CCC(C(C1)Br)Br)Br	Active	1.64	4.36	Alkyl halides	C1CCCCC1	yes
154	CAS:101-96-2	N,N'-Bis(1-methylpropyl)-1,4-benzenediamine	CCC(Nc1ccc(cc1)NC(CC)C)C	Inactive	0.66	5.34	Organonitrogen compounds	c1ccccc1		yes
155	CAS:80-43-3	Dicumyl peroxide	CC(c1ccccc1)(OOC(c1ccccc1)(C)C)C	Inactive	1.62	4.38	Benzene and substituted derivatives	c1ccc(COOCc2ccccc2)cc1		yes		construction and building materials
156	CAS:84-61-7	Dicyclohexyl phthalate	O=C(c1ccccc1C(=O)OC1CCCCC1)OC1CCCCC1	Active	1.9	4.1	Benzene and substituted derivatives	O=C(OC1CCCCC1)c1ccccc1C(=O)OC1CCCCC1	yes	yes
157	CAS:85-98-3	N,N'-Diethylcarbanilide	CCN(C(=O)N(c1ccccc1)CC)c1ccccc1	Active	1.63	4.37	Benzene and substituted derivatives	O=C(Nc1ccccc1)Nc1ccccc1
158	CAS:93-05-0	N,N-Diethylbenzene-1,4-diamine	CCN(c1ccc(cc1)N)CC	Active	1.3	4.7	Organonitrogen compounds	c1ccccc1
159	CID:8981	1,2-Dihydro-2,2,4-trimethylquinoline, polymer	CC1=CC(C)(C)Nc2c1cccc2	Active	1.77	4.23	Quinolines and derivatives	C1=Cc2ccccc2NC1		yes
160	CAS:101-70-2	4,4'-Dimethoxydiphenylamine	COc1ccc(cc1)Nc1ccc(cc1)OC	Inactive	1.73	4.27	Phenol ethers	c1ccc(Nc2ccccc2)cc1
161	CAS:101-67-7	4,4'-Dioctyldiphenylamine	CCCCCCCCc1ccc(cc1)Nc1ccc(cc1)CCCCCCCC	Active	1.56	4.44	Benzene and substituted derivatives	c1ccc(Nc2ccccc2)cc1		yes
162	CAS:120-37-6	3-Ethylamino-4-methylphenol	Cc1ccc(cc1NCC)O	Inactive	1.81	4.19	Phenols	c1ccccc1
163	CAS:1241-94-7	2-Ethylhexyl diphenyl phosphate	CCCCC(COP(=O)(Oc1ccccc1)Oc1ccccc1)CC	Active	1.53	4.47	Organic phosphoric acids and derivatives	O=[PH](Oc1ccccc1)Oc1ccccc1		yes		home maintenance|personal care
164	CAS:6088-51-3	6-Hydroxy-2-naphthyl disulfide	Oc1ccc2c(c1)ccc(c2)SSc1ccc2c(c1)ccc(c2)O	Inactive	1.64	4.36	Naphthalenes	c1ccc2cc(SSc3ccc4ccccc4c3)ccc2c1
165	CID:34697	Isodecyl diphenyl phosphate	CC(CCCCCCCOP(=O)(Oc1ccccc1)Oc1ccccc1)C	Active	1.63	4.37	Organic phosphoric acids and derivatives	O=[PH](Oc1ccccc1)Oc1ccccc1		yes
166	CAS:101-72-4	N-Isopropyl-N'-phenyl-p-phenylenediamine	CC(Nc1ccc(cc1)Nc1ccccc1)C	Active	1.28	4.72	Organonitrogen compounds	c1ccc(Nc2ccccc2)cc1		yes
167	CAS:1504-74-1	2-Methoxycinnamaldehyde	O=CC=Cc1ccccc1OC	Active	1.66	4.34	Cinnamaldehydes	c1ccccc1			antioxidant|fragrance
168	CAS:81-14-1	Musk ketone	[O-][N+](=O)c1c(C)c(C(=O)C)c(c(c1C(C)(C)C)[N+](=O)[O-])C	Active	0.87	5.13	Organooxygen compounds	c1ccccc1		yes	fragrance	cleaning products and household care
169	CAS:2243-61-0	1,4-Naphthalenediamine	Nc1ccc(c2c1cccc2)N	Active	-0.39	6.39	Naphthalenes	c1ccc2ccccc2c1
170	CAS:551-06-4	alpha-Naphylisothiocyanate	S=C=Nc1cccc2c1cccc2	Inactive	0.95	5.05	Naphthalenes	c1ccc2ccccc2c1
171	CAS:21829-25-4	Nifedipine	COC(=O)C1=C(C)NC(=C(C1c1ccccc1[N+](=O)[O-])C(=O)OC)C	Active	1.75	4.25	Pyridines and derivatives	C1=CC(c2ccccc2)C=CN1		yes	antioxidant
172	CAS:485-47-2	Ninhydrin	O=C1c2ccccc2C(=O)C1(O)O	Inactive	0.97	5.03	Indanes	O=C1CC(=O)c2ccccc21
173	CAS:89-40-7	4-Nitrophthalimide	O=C1NC(=O)c2c1cc(cc2)[N+](=O)[O-]	Inactive	1.94	4.06	Isoindoles and derivatives	O=C1NC(=O)c2ccccc21
174	CAS:621-33-0	3-Ethoxyaniline	CCOc1cccc(c1)N	Inactive	1.39	4.61	Phenol ethers	c1ccccc1
175	CAS:1074-12-0	Phenylglyoxal	O=CC(=O)c1ccccc1	Active	1.46	4.54	Benzene and substituted derivatives	c1ccccc1
176	CAS:90-30-2	N-Phenyl-1-naphthylamine	c1ccc(cc1)Nc1cccc2c1cccc2	Active	1.67	4.33	Naphthalenes	c1ccc(Nc2cccc3ccccc23)cc1		yes		manufactured formulations|vehicle
177	CAS:101-54-2	N-Phenyl-1,4-benzenediamine	Nc1ccc(cc1)Nc1ccccc1	Inactive	-0.19	6.19	Benzene and substituted derivatives	c1ccc(Nc2ccccc2)cc1		yes
178	CAS:87-66-1	Pyrogallol	Oc1c(O)cccc1O	Active	1.7	4.3	Phenols	c1ccccc1
179	CAS:472-86-6	13-cis-Retinal	O=C/C=C(\C=C\C=C(\C=C\C1=C(C)CCCC1(C)C)/C)/C	Active	1.07	4.93	Prenol lipids	C1=CCCCC1
180	CAS:116-31-4	Retinal	O=C/C=C(/C=C/C=C(/C=C/C1=C(C)CCCC1(C)C)\C)\C	Active	0.77	5.23	Prenol lipids	C1=CCCCC1				personal care
181	CID:16129778	Tannic acid	O=C(c1cc(O)c(c(c1)OC(=O)c1cc(O)c(c(c1)O)O)O)O[C@@H]1[C@@H](COC(=O)c2cc(O)c(c(c2)OC(=O)c2cc(O)c(c(c2)O)O)O)O[C@H]([C@@H]([C@H]1OC(=O)c1cc(O)c(c(c1)OC(=O)c1cc(O)c(c(c1)O)O)O)OC(=O)c1cc(O)c(c(c1)OC(=O)c1cc(O)c(c(c1)O)O)O)OC(=O)c1cc(O)c(c(c1)OC(=O)c1cc(O)c(c(	Active	0.95	5.05	Tannins	O=C(OCC1OC(OC(=O)c2cccc(OC(=O)c3ccccc3)c2)C(OC(=O)c2cccc(OC(=O)c3ccccc3)c2)C(OC(=O)c2cccc(OC(=O)c3ccccc3)c2)C1OC(=O)c1cccc(OC(=O)c2ccccc2)c1)c1cccc(OC(=O)c2ccccc2)c1		yes	dehydrating agent
182	CAS:95-53-4	2-Methylaniline	Cc1ccccc1N	Active	1.5	4.5	Benzene and substituted derivatives	c1ccccc1		yes
183	CAS:4252-78-2	2,2',4'-Trichloroacetophenone	ClCC(=O)c1ccc(cc1Cl)Cl	Active	1.86	4.14	Organooxygen compounds	c1ccccc1
184	CAS:563-04-2	Tri-m-tolyl phosphate	Cc1cccc(c1)OP(=O)(Oc1cccc(c1)C)Oc1cccc(c1)C	Inactive	1.74	4.26	Organic phosphoric acids and derivatives	O=P(Oc1ccccc1)(Oc1ccccc1)Oc1ccccc1
185	CAS:67-97-0	Vitamin D3	CC(CCC[C@H]([C@H]1CC[C@@H]2[C@]1(C)CCC/C/2=C\C=C/1\C[C@@H](O)CCC1=C)C)C	Active	1.5	4.5	Steroids and steroid derivatives	C=C1CCCCC1=CC=C1CCCC2CCCC12			softener and conditioner	personal care
186	CAS:80-10-4	Dichlorodiphenylsilane	Cl[Si](c1ccccc1)(c1ccccc1)Cl	Inactive	1.86	4.14	Benzene and substituted derivatives	c1ccc([SiH2]c2ccccc2)cc1		yes
187	CAS:81-84-5	1H,3H-Naphtho(1,8-cd)pyran-1,3-dione	O=C1OC(=O)c2c3c1cccc3ccc2	Active	1.21	4.79	Naphthalenes	O=C1OC(=O)c2cccc3cccc1c23		yes
188	CAS:89-08-7	4-Sulfophthalic acid	OC(=O)c1cc(ccc1C(=O)O)S(=O)(=O)O	Inactive	1.68	4.32	Benzene and substituted derivatives	c1ccccc1		yes
189	CAS:96-76-4	2,4-Di-tert-butylphenol	Oc1ccc(cc1C(C)(C)C)C(C)(C)C	Active	1.14	4.86	Benzene and substituted derivatives	c1ccccc1		yes
190	CAS:100-29-8	1-Ethoxy-4-nitrobenzene	CCOc1ccc(cc1)[N+](=O)[O-]	Inactive	1.85	4.15	Benzene and substituted derivatives	c1ccccc1		yes
191	CAS:120-95-6	2,4-Di-tert-pentylphenol	CCC(c1ccc(c(c1)C(CC)(C)C)O)(C)C	Active	1.13	4.87	Benzene and substituted derivatives	c1ccccc1		yes
192	CAS:1724-39-6	Cyclododecanol	OC1CCCCCCCCCCC1	Active	1.83	4.17	Organooxygen compounds	C1CCCCCCCCCCC1		yes
193	CAS:3048-65-5	3a,4,7,7a-Tetrahydroindene	C1=CCC2C(C1)C=CC2	Inactive	1.59	4.41	Polycyclic hydrocarbons	C1=CCC2CC=CC2C1		yes
194	CAS:3147-75-9	Octrizole	Oc1ccc(cc1n1nc2c(n1)cccc2)C(CC(C)(C)C)(C)C	Active	1.42	4.58	Azoles	c1ccc(-n2nc3ccccc3n2)cc1		yes	UV stabilizer|fragrance	cleaning products and household care
195	CAS:17824-83-8	3,4,5,6-Tetrachloropyridine-2-carbonitrile	N#Cc1nc(Cl)c(c(c1Cl)Cl)Cl	Active	1.88	4.12	Pyridines and derivatives	c1ccncc1		yes
196	CID:62530	(1,1,3,3-Tetramethylbutyl)phenol	Oc1ccccc1C(CC(C)(C)C)(C)C	Active	1.18	4.82	Benzene and substituted derivatives	c1ccccc1
197	CID:171144	Dodecylphenol	CCCCCCCCCCCCc1ccccc1O	Active	1.33	4.67	Phenols	c1ccccc1		yes
198	CAS:39515-51-0	3-Phenoxybenzaldehyde	O=Cc1cccc(c1)Oc1ccccc1	Active	1.68	4.32	Benzene and substituted derivatives	c1ccc(Oc2ccccc2)cc1		yes
199	CAS:41663-84-7	N-Methyl-4-nitrophthalimide	CN1C(=O)c2c(C1=O)cc(cc2)[N+](=O)[O-]	Inactive	1.37	4.63	Isoindoles and derivatives	O=C1NC(=O)c2ccccc21		yes
200	CID:75628	Triphenyl phosphates isopropylated	CC(c1ccc(cc1)OP(=O)(Oc1ccc(cc1)C(C)C)Oc1ccc(cc1)C(C)C)C	Active	0.66	5.34	Organic phosphoric acids and derivatives	O=P(Oc1ccccc1)(Oc1ccccc1)Oc1ccccc1		yes		home maintenance|pet care
201	CID:338733	4-Nonylphenol, branched	CC(CCCCCCc1ccc(cc1)O)C	Active	1.5	4.5	Phenols	c1ccccc1	yes	yes	fragrance	cleaning products and household care|home maintenance|vehicle
202	CAS:126-06-7	3-Bromo-1-chloro-5,5-dimethylhydantoin	BrN1C(=O)N(C(C1=O)(C)C)Cl	Inactive	1.65	4.35	Azolidines	O=C1CNC(=O)N1		yes	bleaching agent|cleaning agent|preservative	cleaning products and household care|landscape/yard
203	CAS:2772-45-4	2,4-Bis(1-methyl-1-phenylethyl)phenol	Oc1ccc(cc1C(c1ccccc1)(C)C)C(c1ccccc1)(C)C	Active	1.58	4.42	Diarylheptanoids	c1ccc(Cc2cccc(Cc3ccccc3)c2)cc1		yes
204	CAS:6807-17-6	4,4'-(4-Methylpentane-2,2-diyl)diphenol	CC(CC(c1ccc(cc1)O)(c1ccc(cc1)O)C)C	Active	1.57	4.43	Benzene and substituted derivatives	c1ccc(Cc2ccccc2)cc1	yes
205	CAS:17540-75-9	4-(Butan-2-yl)-2,6-di-tert-butylphenol	CCC(c1cc(c(c(c1)C(C)(C)C)O)C(C)(C)C)C	Inactive	1.32	4.68	Benzene and substituted derivatives	c1ccccc1		yes
206	CAS:85-60-9	4,4'-Butane-1,1-diylbis(2-tert-butyl-5-methylphenol)	CCCC(c1cc(c(cc1C)O)C(C)(C)C)c1cc(c(cc1C)O)C(C)(C)C	Active	0.78	5.22	Benzene and substituted derivatives	c1ccc(Cc2ccccc2)cc1	yes
207	CAS:65277-42-1	Ketoconazole	Clc1ccc(c(c1)Cl)[C@]1(OC[C@@H](O1)COc1ccc(cc1)N1CCN(CC1)C(=O)C)Cn1cncc1	Active	1.26	4.74	Diazinanes	c1ccc(C2(Cn3ccnc3)OCC(COc3ccc(N4CCNCC4)cc3)O2)cc1	yes
208	CAS:989-51-5	(-)-Epigallocatechin gallate	Oc1cc(O)c2c(c1)O[C@@H]([C@@H](C2)OC(=O)c1cc(O)c(c(c1)O)O)c1cc(O)c(c(c1)O)O	Active	1.66	4.34	Flavonoids	O=C(OC1Cc2ccccc2OC1c1ccccc1)c1ccccc1			antioxidant
209	CAS:458-37-7	Curcumin	COc1cc(/C=C/C(=O)CC(=O)/C=C/c2ccc(c(c2)OC)O)ccc1O	Inactive	2.07	3.93	Diarylheptanoids	O=C(C=Cc1ccccc1)CC(=O)C=Cc1ccccc1			antioxidant|dye
210	CAS:65646-68-6	4-Hydroxyphenyl retinamide	O=C(Nc1ccc(cc1)O)/C=C(/C=C/C=C(/C=C/C1=C(C)CCCC1(C)C)\C)\C	Active	1.23	4.77	Prenol lipids	O=C(C=CC=CC=CC=CC1=CCCCC1)Nc1ccccc1
211	CAS:107534-96-3	Tebuconazole	Clc1ccc(cc1)CCC(C(C)(C)C)(Cn1cncn1)O	Active	1.89	4.11	Benzene and substituted derivatives	c1ccc(CCCCn2cncn2)cc1	yes		biocide	pesticides
212	CAS:64359-81-5	4,5-Dichloro-2-octyl-3(2H)-isothiazolone	CCCCCCCCn1sc(c(c1=O)Cl)Cl	Inactive	0.27	5.73	Aryl halides	O=c1ccs[nH]1			preservative
213	CAS:87674-68-8	Dimethenamid	COCC(N(c1c(C)csc1C)C(=O)CCl)C	Active	1.57	4.43	Heteroaromatic compounds	c1ccsc1			biocide
214	CAS:97886-45-8	Dithiopyr	CSC(=O)c1c(nc(c(c1CC(C)C)C(=O)SC)C(F)(F)F)C(F)F	Active	1.89	4.11	Pyridines and derivatives	c1ccncc1				landscape/yard
215	CAS:55283-68-6	Ethalfluralin	CCN(c1c(cc(cc1[N+](=O)[O-])C(F)(F)F)[N+](=O)[O-])CC(=C)C	Active	1.09	4.91	Benzene and substituted derivatives	c1ccccc1
216	CAS:60168-88-9	Fenarimol	Clc1ccc(cc1)C(c1ccccc1Cl)(c1cncnc1)O	Active	1.54	4.46	Benzene and substituted derivatives	c1ccc(C(c2ccccc2)c2cncnc2)cc1	yes		biocide	pesticides
217	CAS:28159-98-0	Cybutryne	CSc1nc(NC2CC2)nc(n1)NC(C)(C)C	Inactive	1.67	4.33	Triazines	c1ncnc(NC2CC2)n1
218	CAS:25311-71-1	Isofenphos	CCOP(=S)(Oc1ccccc1C(=O)OC(C)C)NC(C)C	Inactive	1.68	4.32	Benzene and substituted derivatives	c1ccccc1		yes	biocide	pesticides
219	CAS:87392-12-9	S-Metolachlor	COC[C@@H](N(c1c(C)cccc1CC)C(=O)CCl)C	Active	1.65	4.35	Benzene and substituted derivatives	c1ccccc1	yes
220	CAS:132-66-1	Naptalam	OC(=O)c1ccccc1C(=O)Nc1cccc2c1cccc2	Inactive	1.86	4.14	Naphthalenes	O=C(Nc1cccc2ccccc12)c1ccccc1
221	CAS:68694-11-1	Triflumizole	CCCOC/C(=N\c1ccc(cc1C(F)(F)F)Cl)/n1cncc1	Active	1.62	4.38	Benzene and substituted derivatives	C(=Nc1ccccc1)n1ccnc1	yes		biocide
222	CAS:643-79-8	1,2-Benzenedicarboxaldehyde	O=Cc1ccccc1C=O	Active	1.64	4.36	Benzene and substituted derivatives	c1ccccc1
223	CAS:149877-41-8	Bifenazate	COc1ccc(cc1NNC(=O)OC(C)C)c1ccccc1	Active	1.65	4.35	Benzene and substituted derivatives	c1ccc(-c2ccccc2)cc1
224	CAS:128639-02-1	Carfentrazone-ethyl	CCOC(=O)C(Cc1cc(c(cc1Cl)F)n1nc(n(c1=O)C(F)F)C)Cl	Active	1.61	4.39	Azoles	O=c1[nH]cnn1-c1ccccc1
225	CAS:20018-09-1	Diiodomethyl 4-methylphenyl sulfone	IC(S(=O)(=O)c1ccc(cc1)C)I	Active	0.45	5.55	Benzene and substituted derivatives	c1ccccc1			biocide|preservative
226	CAS:114369-43-6	Fenbuconazole	N#CC(c1ccccc1)(Cn1cncn1)CCc1ccc(cc1)Cl	Active	1.61	4.39	Linear 1,3-diarylpropanoids	c1ccc(CCC(Cn2cncn2)c2ccccc2)cc1	yes		biocide
227	CAS:126833-17-8	Fenhexamid	O=C(C1(C)CCCCC1)Nc1ccc(c(c1Cl)Cl)O	Inactive	1.55	4.45	Benzene and substituted derivatives	O=C(Nc1ccccc1)C1CCCCC1	yes		biocide
228	CAS:117337-19-6	Fluthiacet-methyl	COC(=O)CSc1cc(/N=c/2\sc(=O)n3n2CCCC3)c(cc1Cl)F	Inactive	1.64	4.36	Thioethers	O=c1sc(=Nc2ccccc2)n2n1CCCC2
229	CAS:23031-36-9	Prallethrin	C#CCC1=C(C)C(CC1=O)OC(=O)C1C(C1(C)C)C=C(C)C	Active	1.68	4.32	Fatty Acyls	O=C1C=CC(OC(=O)C2CC2)C1			biocide|other	pesticides
230	CAS:64700-56-7	Triclopyr butotyl	CCCCOCCOC(=O)COc1nc(Cl)c(cc1Cl)Cl	Inactive	-3.9	9.9	Pyridines and derivatives	c1ccncc1				landscape/yard
231	CAS:156052-68-5	Zoxamide	CCC(C(=O)CCl)(NC(=O)c1cc(Cl)c(c(c1)Cl)C)C	Active	1.62	4.38	Benzene and substituted derivatives	c1ccccc1			biocide
232	CAS:33245-39-5	Fluchloralin	CCCN(c1c(cc(cc1[N+](=O)[O-])C(F)(F)F)[N+](=O)[O-])CCCl	Active	0.42	5.58	Benzene and substituted derivatives	c1ccccc1
233	CAS:112226-61-6	Halofenozide	Clc1ccc(cc1)C(=O)NN(C(C)(C)C)C(=O)c1ccccc1	Active	1.44	4.56	Benzene and substituted derivatives	O=C(NNC(=O)c1ccccc1)c1ccccc1
234	CAS:2032-65-7	Methiocarb	CNC(=O)Oc1cc(C)c(c(c1)C)SC	Active	1.99	4.01	Benzene and substituted derivatives	c1ccccc1	yes		biocide
235	CAS:175013-18-0	Pyraclostrobin	COC(=O)N(c1ccccc1COc1ccn(n1)c1ccc(cc1)Cl)OC	Inactive	1.85	4.15	Azoles	c1ccc(COc2ccn(-c3ccccc3)n2)cc1			biocide
236	CAS:7696-12-0	Tetramethrin	O=C(C1C(C1(C)C)C=C(C)C)OCN1C(=O)C2=C(C1=O)CCCC2	Active	1.71	4.29	Isoindoles and derivatives	O=C(OCN1C(=O)C2=C(CCCC2)C1=O)C1CC1	yes		biocide	pesticides
237	CAS:35400-43-2	Sulprofos	CCCSP(=S)(Oc1ccc(cc1)SC)OCC	Active	1.52	4.48	Benzene and substituted derivatives	c1ccccc1			biocide
238	CAS:65558-69-2	1,3-Diiminobenz(f)isoindoline	N=C1NC(=N)c2c1cc1ccccc1c2	Active	1.24	4.76	Naphthalenes	N=C1NC(=N)c2cc3ccccc3cc21
239	CAS:5153-67-3	(E)-beta-Nitrostyrene	[O-][N+](=O)/C=C/c1ccccc1	Inactive	0.37	5.63	Benzene and substituted derivatives	c1ccccc1
240	CAS:39025-24-6	Guggulsterone E	C/C=C\1/C(=O)C[C@@H]2[C@]1(C)CC[C@H]1[C@H]2CCC2=CC(=O)CC[C@]12C	Inactive	1.89	4.11	Steroids and steroid derivatives	C=C1C(=O)CC2C1CCC1C3CCC(=O)C=C3CCC21
241	CAS:566-48-3	4-Hydroxyandrostenedione	O=C1CC[C@]2(C(=C1O)CC[C@@H]1[C@@H]2CC[C@]2([C@H]1CCC2=O)C)C	Active	1.51	4.49	Steroids and steroid derivatives	O=C1C=C2CCC3C4CCC(=O)C4CCC3C2CC1	yes
242	CAS:29091-21-2	Prodiamine	CCCN(c1c(cc(c(c1[N+](=O)[O-])N)C(F)(F)F)[N+](=O)[O-])CCC	Active	0.62	5.38	Benzene and substituted derivatives	c1ccccc1				landscape/yard
243	CAS:134605-64-4	Butafenacil	C=CCOC(=O)C(OC(=O)c1cc(ccc1Cl)n1c(=O)cc(n(c1=O)C)C(F)(F)F)(C)C	Active	1.91	4.09	Benzene and substituted derivatives	O=c1cc[nH]c(=O)n1-c1ccccc1
244	CAS:69327-76-0	Buprofezin	CC(N1C(=NC(C)(C)C)SCN(C1=O)c1ccccc1)C	Inactive	1.62	4.38	Thiadiazinanes	N=C1NC(=O)N(c2ccccc2)CS1			biocide
245	CAS:125116-23-6	Metconazole	OC1(Cn2ncnc2)C(CCC1(C)C)Cc1ccc(cc1)Cl	Active	1.85	4.15	Prenol lipids	c1ccc(CC2CCCC2Cn2cncn2)cc1			biocide
246	CAS:153233-91-1	Etoxazole	CCOc1cc(ccc1C1COC(=N1)c1c(F)cccc1F)C(C)(C)C	Inactive	1.7	4.3	Benzene and substituted derivatives	c1ccc(C2=NC(c3ccccc3)CO2)cc1
247	CAS:131807-57-3	Famoxadone	O=C1OC(C(=O)N1Nc1ccccc1)(C)c1ccc(cc1)Oc1ccccc1	Active	1.68	4.32	Benzene and substituted derivatives	O=C1OC(c2ccc(Oc3ccccc3)cc2)C(=O)N1Nc1ccccc1			biocide
248	CAS:161326-34-7	Fenamidone	CSC1=N[C@@](C(=O)N1Nc1ccccc1)(C)c1ccccc1	Active	1.6	4.4	Carboxylic acids and derivatives	O=C1C(c2ccccc2)N=CN1Nc1ccccc1			biocide
249	CAS:361377-29-9	Fluoxastrobin	CO/N=C(\c1ccccc1Oc1ncnc(c1F)Oc1ccccc1Cl)/C1=NOCCO1	Active	1.43	4.57	Organooxygen compounds	N=C(C1=NOCCO1)c1ccccc1Oc1cc(Oc2ccccc2)ncn1			biocide
250	CAS:125225-28-7	Ipconazole	CC(C1CCC(C1(O)Cn1ncnc1)Cc1ccc(cc1)Cl)C	Active	1.56	4.44	Prenol lipids	c1ccc(CC2CCCC2Cn2cncn2)cc1
251	CAS:35575-96-3	Azamethiphos	COP(=O)(SCn1c(=O)oc2c1ncc(c2)Cl)OC	Active	1.53	4.47	Oxazolopyridines	O=c1[nH]c2ncccc2o1
252	CAS:112410-23-8	Tebufenozide	CCc1ccc(cc1)C(=O)NN(C(C)(C)C)C(=O)c1cc(C)cc(c1)C	Active	1.26	4.74	Benzene and substituted derivatives	O=C(NNC(=O)c1ccccc1)c1ccccc1			biocide
253	CAS:112281-77-3	Tetraconazole	Clc1ccc(c(c1)Cl)C(Cn1cncn1)COC(C(F)F)(F)F	Inactive	1.64	4.36	Benzene and substituted derivatives	c1ccc(CCn2cncn2)cc1			biocide
254	CAS:4342-36-3	Tributyltin benzoate	CCCC[Sn](OC(=O)c1ccccc1)(CCCC)CCCC	Inactive	-0.1	6.1	Benzene and substituted derivatives	c1ccccc1
255	CAS:584-79-2	Allethrin	C=CCC1=C(C)C(CC1=O)OC(=O)C1C(C1(C)C)C=C(C)C	Inactive	1.94	4.06	Fatty Acyls	O=C1C=CC(OC(=O)C2CC2)C1			biocide	pesticides|pet care
256	CAS:797-63-7	Levonorgestrel	C#C[C@]1(O)CC[C@@H]2[C@]1(CC)CC[C@H]1[C@H]2CCC2=CC(=O)CC[C@H]12	Inactive	1.33	4.67	Steroids and steroid derivatives	O=C1C=C2CCC3C4CCCC4CCC3C2CC1
257	CAS:53-41-8	Androsterone	O[C@@H]1CC[C@]2([C@H](C1)CC[C@@H]1[C@@H]2CC[C@]2([C@H]1CCC2=O)C)C	Inactive	1.82	4.18	Steroids and steroid derivatives	O=C1CCC2C1CCC1C3CCCCC3CCC21
258	CAS:791-31-1	Triphenylsilanol	O[Si](c1ccccc1)(c1ccccc1)c1ccccc1	Active	1.65	4.35	Benzene and substituted derivatives	c1ccc([SiH](c2ccccc2)c2ccccc2)cc1
259	CAS:91-95-2	3,3'-Diaminobenzidine	Nc1ccc(cc1N)c1ccc(c(c1)N)N	Inactive	0.7	5.3	Benzene and substituted derivatives	c1ccc(-c2ccccc2)cc1			surfactant
260	CAS:68392-35-8	4-Hydroxytamoxifen	CCC(=C(c1ccc(cc1)O)c1ccc(cc1)OCCN(C)C)c1ccccc1	Active	1.51	4.49	Stilbenes	C(=C(c1ccccc1)c1ccccc1)c1ccccc1
261	CAS:55179-31-2	Bitertanol	OC(C(C)(C)C)C(n1cncn1)Oc1ccc(cc1)c1ccccc1	Active	1.9	4.1	Benzene and substituted derivatives	c1ccc(-c2ccc(OCn3cncn3)cc2)cc1	yes		biocide
262	CAS:299-86-5	Crufomate	CNP(=O)(Oc1ccc(cc1Cl)C(C)(C)C)OC	Inactive	1.64	4.36	Benzene and substituted derivatives	c1ccccc1
263	CAS:87130-20-9	Diethofencarb	CCOc1cc(ccc1OCC)NC(=O)OC(C)C	Inactive	-1.38	7.38	Benzene and substituted derivatives	c1ccccc1
264	CAS:959-98-8	Endosulfan I	O=S1OC[C@@H]2[C@H](CO1)[C@]1(C([C@]2(Cl)C(=C1Cl)Cl)(Cl)Cl)Cl	Active	1.06	4.94	Organic oxoanionic compounds	O=S1OCC2C3C=CC(C3)C2CO1	yes		biocide
265	CAS:1031-07-8	Endosulfan sulfate	ClC1=C(Cl)C2(C(C1(Cl)C1C2COS(=O)(=O)OC1)(Cl)Cl)Cl	Active	1.16	4.84	Organic sulfuric acids and derivatives	O=S1(=O)OCC2C3C=CC(C3)C2CO1
266	CAS:135590-91-9	Mefenpyr-diethyl	CCOC(=O)C1(C)CC(=NN1c1ccc(cc1Cl)Cl)C(=O)OCC	Active	1.68	4.32	Carboxylic acids and derivatives	C1=NN(c2ccccc2)CC1
267	CAS:27955-94-8	4,4',4''-Ethane-1,1,1-triyltriphenol	CC(c1ccc(cc1)O)(c1ccc(cc1)O)c1ccc(cc1)O	Active	1.64	4.36	Triphenyl compounds	c1ccc(C(c2ccccc2)c2ccccc2)cc1
268	CAS:1478-61-1	Bisphenol AF	FC(C(C(F)(F)F)(c1ccc(cc1)O)c1ccc(cc1)O)(F)F	Active	1.62	4.38	Benzene and substituted derivatives	c1ccc(Cc2ccccc2)cc1	yes
269	CAS:31519-22-9	1,4-Dihydroxy-2-naphthoic acid	OC(=O)c1cc(O)c2c(c1O)cccc2	Inactive	-0.37	6.37	Naphthalenes	c1ccc2ccccc2c1
270	CAS:3236-71-3	4,4'-(9H-Fluorene-9,9-diyl)diphenol	Oc1ccc(cc1)C1(c2ccc(cc2)O)c2ccccc2-c2c1cccc2	Active	1.76	4.24	Fluorenes	c1ccc(C2(c3ccccc3)c3ccccc3-c3ccccc32)cc1	yes
271	CAS:744-45-6	Diphenyl isophthalate	O=C(c1cccc(c1)C(=O)Oc1ccccc1)Oc1ccccc1	Inactive	1.66	4.34	Depsides and depsidones	O=C(Oc1ccccc1)c1cccc(C(=O)Oc2ccccc2)c1
272	CAS:5315-79-7	1-Hydroxypyrene	Oc1ccc2c3c1ccc1c3c(cc2)ccc1	Inactive	2.35	3.65	Pyrenes	c1cc2ccc3cccc4ccc(c1)c2c34
273	CAS:2835-68-9	4-Aminobenzamide	Nc1ccc(cc1)C(=O)N	Inactive	1.89	4.11	Benzene and substituted derivatives	c1ccccc1
274	CAS:71868-10-5	2-Methyl-4'-(methylthio)-2-morpholinopropiophenone	CSc1ccc(cc1)C(=O)C(N1CCOCC1)(C)C	Active	0.99	5.01	Organooxygen compounds	O=C(CN1CCOCC1)c1ccccc1	yes
275	CAS:35958-30-6	Tetrabutyl ethylidenebisphenol	CC(c1cc(cc(c1O)C(C)(C)C)C(C)(C)C)c1cc(cc(c1O)C(C)(C)C)C(C)(C)C	Inactive	1.83	4.17	Benzene and substituted derivatives	c1ccc(Cc2ccccc2)cc1			antioxidant|fragrance
276	CAS:4162-45-2	Tetrabromobisphenol A bis(2-hydroxyethyl) ether	OCCOc1c(Br)cc(cc1Br)C(c1cc(Br)c(c(c1)Br)OCCO)(C)C	Active	1.48	4.52	Benzene and substituted derivatives	c1ccc(Cc2ccccc2)cc1
277	CAS:53-96-3	2-Acetylaminofluorene	CC(=O)Nc1ccc2-c3c(Cc2c1)cccc3	Active	1.69	4.31	Fluorenes	c1ccc2c(c1)Cc1ccccc1-2
278	CAS:141-86-6	2,6-Diaminopyridine	Nc1cccc(n1)N	Active	1.82	4.18	Pyridines and derivatives	c1ccncc1
279	CAS:1617-90-9	Vincamine	COC(=O)[C@@]1(O)C[C@]2(CC)CCCN3[C@@H]2c2n1c1ccccc1c2CC3	Active	1.67	4.33	Eburnan-type alkaloids	c1ccc2c(c1)c1c3n2CCC2CCCN(CC1)C32
280	CAS:29091-05-2	Dinitramine	CCN(c1c(cc(c(c1[N+](=O)[O-])N)C(F)(F)F)[N+](=O)[O-])CC	Active	1.12	4.88	Benzene and substituted derivatives	c1ccccc1
281	CAS:3347-22-6	Dithianon	N#Cc1sc2=c(sc1C#N)c(=O)c1c(c2=O)cccc1	Inactive	-1.14	7.14	Naphthalenes	O=c1c2sccsc=2c(=O)c2ccccc12
282	CAS:80-06-8	Chlorfenethol	CC(c1ccc(cc1)Cl)(c1ccc(cc1)Cl)O	Active	1.84	4.16	Benzene and substituted derivatives	c1ccc(Cc2ccccc2)cc1
283	CAS:13360-45-7	Chlorbromuron	CON(C(=O)Nc1ccc(c(c1)Cl)Br)C	Active	1.67	4.33	Benzene and substituted derivatives	c1ccccc1
284	CAS:163520-33-0	Isoxadifen-ethyl	CCOC(=O)C1=NOC(C1)(c1ccccc1)c1ccccc1	Active	1.82	4.18	Benzene and substituted derivatives	C1=NOC(c2ccccc2)(c2ccccc2)C1
285	CAS:83657-24-3	Diniconazole	Clc1ccc(c(c1)Cl)/C=C(\C(C(C)(C)C)O)/n1cncn1	Inactive	2.06	3.94	Cinnamyl alcohols	C(=Cn1cncn1)c1ccccc1
286	CAS:5300-03-8	9-cis Retinoic acid	C/C(=C/C=C/C(=C/C(=O)O)/C)/C=C/C1=C(C)CCCC1(C)C	Inactive	1.62	4.38	Prenol lipids	C1=CCCCC1
287	CAS:60-92-4	cAMP	O[C@@H]1[C@@H]2OP(=O)(O)OC[C@H]2O[C@H]1n1cnc2c1ncnc2N	Active	-1.54	7.54	Purine nucleotides	O=[PH]1OCC2OC(n3cnc4cncnc43)CC2O1
288	CAS:66575-29-9	Forskolin	C=C[C@@]1(C)CC(=O)[C@]2([C@@](O1)(C)[C@@H](OC(=O)C)[C@H]([C@@H]1[C@]2(C)[C@@H](O)CCC1(C)C)O)O	Active	-1.85	7.85	Prenol lipids	O=C1CCOC2CCC3CCCCC3C12	yes
289	CAS:153559-49-0	Bexarotene	Cc1cc2c(cc1C(=C)c1ccc(cc1)C(=O)O)C(C)(C)CCC2(C)C	Active	1.61	4.39	Prenol lipids	C=C(c1ccccc1)c1ccc2c(c1)CCCC2
290	CAS:58186-27-9	Idebenone	OCCCCCCCCCCC1=C(C)C(=O)C(=C(C1=O)OC)OC	Inactive	0.45	5.55	Prenol lipids	O=C1C=CC(=O)C=C1			antioxidant
291	CAS:59-85-8	4-Chloromercuribenzoic acid	Cl[Hg]c1ccc(cc1)C(=O)O	Active	1.21	4.79	Benzene and substituted derivatives	c1ccccc1
292	CAS:639-58-7	Triphenyltin chloride	Cl[Sn](c1ccccc1)(c1ccccc1)c1ccccc1	Active	-0.45	6.45	Benzene and substituted derivatives	c1ccc([SnH](c2ccccc2)c2ccccc2)cc1	yes
293	CAS:74772-77-3	Ciglitizone	O=C1NC(=O)C(S1)Cc1ccc(cc1)OCC1(C)CCCCC1	Inactive	1.37	4.63	Phenol ethers	O=C1NC(=O)C(Cc2ccc(OCC3CCCCC3)cc2)S1
294	CAS:6898-97-1	(Z,E)-Diethylstilbestrol	CCC(=C(c1ccc(cc1)O)CC)c1ccc(cc1)O	Inactive	1.36	4.64	Stilbenes	C(=Cc1ccccc1)c1ccccc1
295	CAS:179324-69-7	Bortezomib	CC(C[C@@H](B(O)O)NC(=O)[C@@H](NC(=O)c1cnccn1)Cc1ccccc1)C	Inactive	1.17	4.83	Carboxylic acids and derivatives	O=C(NCCc1ccccc1)c1cnccn1
296	CAS:85532-75-8	PK 11195	CCC(N(C(=O)c1cc2ccccc2c(n1)c1ccccc1Cl)C)C	Active	1.12	4.88	Pyridines and derivatives	c1ccc(-c2nccc3ccccc23)cc1
297	CAS:149647-78-9	Suberoylanilide hydroxamic acid	ONC(=O)CCCCCCC(=O)Nc1ccccc1	Inactive	0.51	5.49	Benzene and substituted derivatives	c1ccccc1
298	CAS:705-60-2	(2-Nitro-1-propenyl)benzene	CC(=Cc1ccccc1)[N+](=O)[O-]	Active	1.37	4.63	Benzene and substituted derivatives	c1ccccc1
299	CAS:68052-23-3	2,2,4-Trimethylpentane-1,3-diyl dibenzoate	O=C(c1ccccc1)OCC(C(C(C)C)OC(=O)c1ccccc1)(C)C	Active	1.42	4.58	Benzene and substituted derivatives	O=C(OCCCOC(=O)c1ccccc1)c1ccccc1		yes	plasticizer	personal care
300	CAS:88-58-4	2,5-Di-tert-butylbenzene-1,4-diol	CC(c1cc(O)c(cc1O)C(C)(C)C)(C)C	Inactive	1.08	4.92	Benzene and substituted derivatives	c1ccccc1			antioxidant
301	CAS:14233-37-5	1,4-Bis(N-isopropylamino)anthraquinone	CC(Nc1ccc(c2c1C(=O)c1c(C2=O)cccc1)NC(C)C)C	Active	0.71	5.29	Anthracenes	O=C1c2ccccc2C(=O)c2ccccc21
302	CAS:77-53-2	(+)-Cedrol	C[C@@H]1CC[C@@H]2[C@@]31CC[C@@]([C@H](C3)C2(C)C)(C)O	Active	1.62	4.38	Prenol lipids	C1CC2CC3CCCC3(C1)C2			fragrance|softener and conditioner	cleaning products and household care
303	CAS:941-69-5	1-Phenyl-1H-pyrrole-2,5-dione	O=C1C=CC(=O)N1c1ccccc1	Active	0.78	5.22	Pyrrolines	O=C1C=CC(=O)N1c1ccccc1		yes
304	CAS:1594-56-5	2,4-Dinitrophenyl thiocyanate	N#CSc1ccc(cc1[N+](=O)[O-])[N+](=O)[O-]	Active	1.13	4.87	Benzene and substituted derivatives	c1ccccc1
305	CAS:489-01-0	2,6-Di-tert-butyl-4-methoxyphenol	COc1cc(c(c(c1)C(C)(C)C)O)C(C)(C)C	Active	1.53	4.47	Phenols	c1ccccc1
306	CAS:87-26-3	2-(1-Methylbutyl)phenol	CCCC(c1ccccc1O)C	Active	1.69	4.31	Phenols	c1ccccc1
307	CAS:3737-41-5	3,3,4,4-Tetrachlorotetrahydrothiophene 1,1-dioxide	ClC1(Cl)CS(=O)(=O)CC1(Cl)Cl	Active	0.71	5.29	Thiolanes	O=S1(=O)CCCC1
308	CAS:83164-33-4	Diflufenican	Fc1ccc(c(c1)F)NC(=O)c1cccnc1Oc1cccc(c1)C(F)(F)F	Active	1.35	4.65	Benzene and substituted derivatives	O=C(Nc1ccccc1)c1cccnc1Oc1ccccc1
309	CAS:497-39-2	3-Methyl-4,6-di-tert-butylphenol	Cc1cc(O)c(cc1C(C)(C)C)C(C)(C)C	Active	1.65	4.35	Benzene and substituted derivatives	c1ccccc1		yes
310	CAS:1124-33-0	4-Nitropyridine-1-oxide	[O-][n+]1ccc(cc1)[N+](=O)[O-]	Active	0.52	5.48	Allyl-type 1,3-dipolar organic compounds	c1cc[nH+]cc1
311	CAS:1879-09-0	Topanol A	Cc1cc(C)c(c(c1)C(C)(C)C)O	Inactive	1.59	4.41	Benzene and substituted derivatives	c1ccccc1		yes	antioxidant
312	CAS:36001-88-4	Amiprofos-methyl	COP(=S)(Oc1ccc(cc1[N+](=O)[O-])C)NC(C)C	Active	1.8	4.2	Benzene and substituted derivatives	c1ccccc1
313	CAS:101-27-9	Barban	ClCC#CCOC(=O)Nc1cccc(c1)Cl	Inactive	1.93	4.07	Benzene and substituted derivatives	c1ccccc1
314	CAS:71626-11-4	Benalaxyl	COC(=O)C(N(c1c(C)cccc1C)C(=O)Cc1ccccc1)C	Active	1.82	4.18	Carboxylic acids and derivatives	O=C(Cc1ccccc1)Nc1ccccc1
315	CAS:609-54-1	2,5-Dimethylbenzenesulfonic acid	Cc1ccc(c(c1)S(=O)(=O)O)C	Inactive	-1.98	7.98	Benzene and substituted derivatives	c1ccccc1
316	CAS:7785-70-8	(+)-alpha-Pinene	CC1=CC[C@@H]2C[C@H]1C2(C)C	Inactive	1.06	4.94	Prenol lipids	C1=CC2CC(C1)C2		yes	fragrance	cleaning products and household care
317	CAS:1715-40-8	Bromociclen	BrCC1CC2(C(C1(Cl)C(=C2Cl)Cl)(Cl)Cl)Cl	Active	0.51	5.49	Vinyl halides	C1=CC2CCC1C2
318	CAS:509-34-2	C.I. Solvent Red 49	CCN(c1ccc2c(c1)Oc1c(C32OC(=O)c2c3cccc2)ccc(c1)N(CC)CC)CC	Active	1.3	4.7	Benzopyrans	O=C1OC2(c3ccccc3Oc3ccccc32)c2ccccc21			dye	cleaning products and household care
319	CAS:5836-10-2	Chloropropylate	CC(OC(=O)C(c1ccc(cc1)Cl)(c1ccc(cc1)Cl)O)C	Active	1.58	4.42	Benzene and substituted derivatives	c1ccc(Cc2ccccc2)cc1
320	CAS:1085-98-9	Dichlofluanid	CN(S(=O)(=O)N(c1ccccc1)SC(Cl)(Cl)F)C	Active	0.99	5.01	Benzene and substituted derivatives	c1ccccc1		yes	biocide
321	CAS:1420-07-1	Dinoterb	[O-][N+](=O)c1cc([N+](=O)[O-])c(c(c1)C(C)(C)C)O	Inactive	1.99	4.01	Phenols	c1ccccc1
322	CAS:52756-22-6	Flamprop-isopropyl	CC(OC(=O)C(N(C(=O)c1ccccc1)c1ccc(c(c1)Cl)F)C)C	Active	1.42	4.58	Benzene and substituted derivatives	O=C(Nc1ccccc1)c1ccccc1
323	CAS:4776-06-1	Fluorosalan	Brc1cc(Br)c(c(c1)C(=O)Nc1cccc(c1)C(F)(F)F)O	Inactive	1.8	4.2	Benzene and substituted derivatives	O=C(Nc1ccccc1)c1ccccc1			biocide
324	CAS:67-45-8	Furazolidone	O=C1OCCN1N=Cc1ccc(o1)[N+](=O)[O-]	Inactive	1	5	Furans	O=C1OCCN1N=Cc1ccco1
325	CAS:465-73-6	Isodrin	ClC1=C(Cl)[C@@]2(C([C@@]1(Cl)[C@H]1[C@@H]2[C@@H]2C[C@@H]1C=C2)(Cl)Cl)Cl	Active	1.08	4.92	Vinyl halides	C1=CC2CC1C1C3C=CC(C3)C21
326	CAS:100-56-1	Phenylmercuric chloride	Cl[Hg]c1ccccc1	Active	0.81	5.19	Benzene and substituted derivatives	c1ccccc1			preservative
327	CAS:28730-17-8	Methfuroxam	O=C(c1c(C)oc(c1C)C)Nc1ccccc1	Active	1.74	4.26	Benzene and substituted derivatives	O=C(Nc1ccccc1)c1ccoc1
328	CAS:4726-14-1	Nitralin	CCCN(c1c(cc(cc1[N+](=O)[O-])S(=O)(=O)C)[N+](=O)[O-])CCC	Active	0.4	5.6	Benzene and substituted derivatives	c1ccccc1
329	CAS:17781-31-6	Parinol	Clc1ccc(cc1)C(c1ccc(cc1)Cl)(c1cccnc1)O	Active	1.62	4.38	Benzene and substituted derivatives	c1ccc(C(c2ccccc2)c2cccnc2)cc1
330	CAS:66063-05-6	Pencycuron	Clc1ccc(cc1)CN(C(=O)Nc1ccccc1)C1CCCC1	Active	1.76	4.24	Benzene and substituted derivatives	O=C(Nc1ccccc1)N(Cc1ccccc1)C1CCCC1
331	CAS:156-06-9	Phenylpyruvic acid	O=C(C(=O)O)Cc1ccccc1	Active	1.47	4.53	Benzene and substituted derivatives	c1ccccc1
332	CAS:731-27-1	Tolylfluanid	Cc1ccc(cc1)N(S(=O)(=O)N(C)C)SC(Cl)(Cl)F	Active	0.82	5.18	Benzene and substituted derivatives	c1ccccc1	yes		biocide
333	CAS:603-33-8	Triphenylbismuth	c1ccc(cc1)[Bi](c1ccccc1)c1ccccc1	Active	1.62	4.38	Benzene and substituted derivatives	c1ccc([Bi](c2ccccc2)c2ccccc2)cc1
334	CAS:594-30-9	Triphenylbismuthine dichloride	Cl[Bi](c1ccccc1)(c1ccccc1)(c1ccccc1)Cl	Active	0.5	5.5	Benzene and substituted derivatives	c1ccc([Bi](c2ccccc2)c2ccccc2)cc1
335	CAS:379-52-2	Triphenyltin fluoride	F[Sn](c1ccccc1)(c1ccccc1)c1ccccc1	Active	-0.62	6.62	Benzene and substituted derivatives	c1ccc([SnH](c2ccccc2)c2ccccc2)cc1
336	CAS:101975-10-4	Zardaverine	COc1cc(ccc1OC(F)F)c1ccc(=O)[nH]n1	Active	0.68	5.32	Diazines	O=c1ccc(-c2ccccc2)n[nH]1
337	CAS:87051-43-2	Ritanserin	Fc1ccc(cc1)C(=C1CCN(CC1)CCc1c(C)nc2n(c1=O)ccs2)c1ccc(cc1)F	Active	1.54	4.46	Benzene and substituted derivatives	O=c1c(CCN2CCC(=C(c3ccccc3)c3ccccc3)CC2)cnc2sccn12
338	CAS:2735-04-8	2,4-Dimethoxyaniline	COc1ccc(c(c1)OC)N	Inactive	1.45	4.55	Benzene and substituted derivatives	c1ccccc1
339	CAS:61413-54-5	Rolipram	COc1ccc(cc1OC1CCCC1)C1CNC(=O)C1	Inactive	1.04	4.96	Pyrrolidines	O=C1CC(c2cccc(OC3CCCC3)c2)CN1
340	CAS:36443-68-2	Triethylene glycol bis(3-tert-butyl-4-hydroxy-5-methylphenyl)propionate	O=C(CCc1cc(C)c(c(c1)C(C)(C)C)O)OCCOCCOCCOC(=O)CCc1cc(C)c(c(c1)C(C)(C)C)O	Active	1.3	4.7	Benzene and substituted derivatives	O=C(CCc1ccccc1)OCCOCCOCCOC(=O)CCc1ccccc1		yes		construction and building materials|pet care
341	CAS:130-95-0	Quinine	C=C[C@H]1C[N@@]2CC[C@H]1C[C@H]2[C@@H](c1ccnc2c1cc(OC)cc2)O	Active	1.44	4.56	Cinchona alkaloids	c1ccc2c(CC3CC4CCN3CC4)ccnc2c1			flavoring and nutrient
342	CAS:13676-54-5	Bismaleimide	O=C1C=CC(=O)N1c1ccc(cc1)Cc1ccc(cc1)N1C(=O)C=CC1=O	Active	0.79	5.21	Benzene and substituted derivatives	O=C1C=CC(=O)N1c1ccc(Cc2ccc(N3C(=O)C=CC3=O)cc2)cc1
343	CAS:3006-93-7	N,N'-1,3-Phenylenedimaleimide	O=C1C=CC(=O)N1c1cccc(c1)N1C(=O)C=CC1=O	Active	0.82	5.18	Pyrrolines	O=C1C=CC(=O)N1c1cccc(N2C(=O)C=CC2=O)c1				construction and building materials
344	CAS:5510-99-6	2,6-Di(butan-2-yl)phenol	CCC(c1cccc(c1O)C(CC)C)C	Active	1.66	4.34	Benzene and substituted derivatives	c1ccccc1
345	CAS:1135-66-6	(-)-Isolongifolene	CC1(C)[C@H]2CC[C@@]3(C1=CCCC3(C)C)C2	Active	1.85	4.15	Prenol lipids	C1=C2CC3CCC2(CCC1)C3			fragrance	cleaning products and household care
346	CAS:116-66-5	1,1,3,3,5-Pentamethyl-4,6-dinitro-2,3-dihydro-1H-indene	[O-][N+](=O)c1c(C)c(cc2c1C(C)(C)CC2(C)C)[N+](=O)[O-]	Active	1.56	4.44	Indanes	c1ccc2c(c1)CCC2
347	CAS:122-64-5	Phenylmercuric lactate	CC(C(=O)O[Hg]c1ccccc1)O	Active	0.59	5.41	Benzene and substituted derivatives	c1ccccc1
348	CAS:122-82-7	N-(4-Ethoxyphenyl)-3-oxobutanamide	CCOc1ccc(cc1)NC(=O)CC(=O)C	Active	1.45	4.55	Benzene and substituted derivatives	c1ccccc1
349	CAS:13301-61-6	C.I. Disperse Orange 37	N#CCCN(c1ccc(cc1)N=Nc1c(Cl)cc(cc1Cl)[N+](=O)[O-])CC	Active	1.8	4.2	Azobenzenes	c1ccc(N=Nc2ccccc2)cc1
350	CAS:26399-36-0	Profluralin	CCCN(c1c(cc(cc1[N+](=O)[O-])C(F)(F)F)[N+](=O)[O-])CC1CC1	Active	0.76	5.24	Benzene and substituted derivatives	c1ccc(NCC2CC2)cc1
351	CAS:30007-47-7	5-Bromo-5-nitro-1,3-dioxane	BrC1(COCOC1)[N+](=O)[O-]	Active	1.49	4.51	Dioxanes	C1COCOC1			preservative
352	CAS:145-39-1	1-tert-Butyl-3,4,5-trimethyl-2,6-dinitrobenzene	Cc1c(C)c([N+](=O)[O-])c(c(c1C)[N+](=O)[O-])C(C)(C)C	Active	1.76	4.24	Benzene and substituted derivatives	c1ccccc1
353	CAS:2398-37-0	1-Bromo-3-methoxybenzene	COc1cccc(c1)Br	Active	-4	10	Phenol ethers	c1ccccc1
354	CAS:3468-11-9	1H-Isoindole-1,3(2H)-diimine	N=C1NC(=N)c2c1cccc2	Active	1.61	4.39	Isoindoles and derivatives	N=C1NC(=N)c2ccccc21
355	CAS:5495-84-1	2-(Propan-2-yl)-9H-thioxanthen-9-one	CC(c1ccc2c(c1)c(=O)c1c(s2)cccc1)C	Inactive	-3.08	9.08	Thiochromenes	O=c1c2ccccc2sc2ccccc12	yes
356	CAS:4501-58-0	[(1R)-2,2,3-Trimethylcyclopent-3-en-1-yl]acetaldehyde	O=CC[C@H]1CC=C(C1(C)C)C	Inactive	1.49	4.51	Prenol lipids	C1=CCCC1			fragrance
357	CAS:1205-64-7	3-Methyl-N-phenylaniline	Cc1cccc(c1)Nc1ccccc1	Inactive	1.91	4.09	Benzene and substituted derivatives	c1ccc(Nc2ccccc2)cc1
358	CAS:3407-42-9	3-(5,5,6-Trimethylbicyclo[2.2.1]hept-2-yl)cyclohexanol	OC1CCCC(C1)C1CC2CC1C(C2(C)C)C	Active	1.9	4.1	Prenol lipids	C1CCC(C2CC3CCC2C3)CC1			fragrance	cleaning products and household care
359	CAS:1565-94-2	Bisphenol A glycidyl methacrylate	OC(COC(=O)C(=C)C)COc1ccc(cc1)C(c1ccc(cc1)OCC(COC(=O)C(=C)C)O)(C)C	Inactive	1.12	4.88	Benzene and substituted derivatives	c1ccc(Cc2ccccc2)cc1				home maintenance|medical/dental|personal care
360	CAS:2449-05-0	Dibenzyl diazene-1,2-dicarboxylate	O=C(N=NC(=O)OCc1ccccc1)OCc1ccccc1	Active	1.5	4.5	Benzene and substituted derivatives	O=C(N=NC(=O)OCc1ccccc1)OCc1ccccc1
361	CAS:2460-77-7	2,5-Di-tert-butylcyclohexa-2,5-diene-1,4-dione	CC(C1=CC(=O)C(=CC1=O)C(C)(C)C)(C)C	Active	0.92	5.08	Organooxygen compounds	O=C1C=CC(=O)C=C1
362	CAS:3027-21-2	Dimethoxy(methyl)phenylsilane	CO[Si](c1ccccc1)(OC)C	Inactive	1.91	4.09	Organometalloid compounds	c1ccccc1
363	CAS:40220-08-4	(2,4,6-Trioxo-1,3,5-triazinane-1,3,5-triyl)triethane-2,1-diyl trisprop-2-enoate	C=CC(=O)OCCn1c(=O)n(CCOC(=O)C=C)c(=O)n(c1=O)CCOC(=O)C=C	Active	1.89	4.11	Carboxylic acids and derivatives	O=c1[nH]c(=O)[nH]c(=O)[nH]1
364	CAS:10262-69-8	Maprotiline	CNCCCC12CCC(c3c1cccc3)c1c2cccc1	Active	1.41	4.59	Anthracenes	c1ccc2c(c1)C1CCC2c2ccccc21
365	CAS:59939-16-1	Cirazoline	C1CN=C(N1)COc1ccccc1C1CC1	Active	1.26	4.74	Phenol ethers	c1ccc(C2CC2)c(OCC2=NCCN2)c1
366	CAS:73963-72-1	Cilostazol	O=C1CCc2c(N1)ccc(c2)OCCCCc1nnnn1C1CCCCC1	Active	0.91	5.09	Quinolines and derivatives	O=C1CCc2cc(OCCCCc3nnnn3C3CCCCC3)ccc2N1
367	CAS:68550-75-4	Cilostamide	O=C(N(C1CCCCC1)C)CCCOc1ccc2c(c1)ccc(=O)[nH]2	Active	-0.47	6.47	Quinolines and derivatives	O=C(CCCOc1ccc2[nH]c(=O)ccc2c1)NC1CCCCC1
368	CAS:77671-31-9	Enoximone	CSc1ccc(cc1)C(=O)c1[nH]c(=O)[nH]c1C	Active	1.34	4.66	Organooxygen compounds	O=C(c1ccccc1)c1c[nH]c(=O)[nH]1
369	CAS:79944-58-4	Idazoxan	C1CN=C(N1)C1COc2c(O1)cccc2	Active	1.34	4.66	Benzodioxanes	c1ccc2c(c1)OCC(C1=NCCN1)O2
370	CAS:19982-08-2	Memantine	CC12CC3CC(C1)(C)CC(C2)(C3)N	Inactive	1.53	4.47	Organonitrogen compounds	C1C2CC3CC1CC(C2)C3
371	CAS:115344-47-3	Siguazodan	N#CN/C(=N/c1ccc(cc1)C1=NNC(=O)CC1C)/NC	Active	1.4	4.6	Diazines	O=C1CCC(c2ccccc2)=NN1
372	CAS:2447-54-3	Sanguinarine	C[n+]1cc2c3OCOc3ccc2c2c1c1cc3OCOc3cc1cc2	Inactive	0.31	5.69	Benzophenanthridine alkaloids	c1cc2c(c[nH+]c3c4cc5c(cc4ccc23)OCO5)c2c1OCO2
373	CAS:965-52-6	Nifuroxazide	Oc1ccc(cc1)C(=O)NN=Cc1ccc(o1)[N+](=O)[O-]	Inactive	0.64	5.36	Benzene and substituted derivatives	O=C(NN=Cc1ccco1)c1ccccc1
374	CAS:2438-72-4	Bufexamac	CCCCOc1ccc(cc1)CC(=O)NO	Active	1.7	4.3	Benzene and substituted derivatives	c1ccccc1
375	CAS:22881-35-2	Famprofazone	CC(N(Cc1c(C(C)C)c(=O)n(n1C)c1ccccc1)C)Cc1ccccc1	Active	1.4	4.6	Azoles	O=c1cc(CNCCc2ccccc2)[nH]n1-c1ccccc1
376	CAS:54767-75-8	Suloctdil	CCCCCCCCNC(C(c1ccc(cc1)SC(C)C)O)C	Active	1	5	Benzene and substituted derivatives	c1ccccc1
377	CAS:54239-37-1	Cimaterol	N#Cc1cc(ccc1N)C(CNC(C)C)O	Active	-2.77	8.77	Benzene and substituted derivatives	c1ccccc1
378	CAS:5051-62-7	Guanabenz	NC(=N)NN=Cc1c(Cl)cccc1Cl	Inactive	1.39	4.61	Benzene and substituted derivatives	c1ccccc1
379	CAS:72332-33-3	Procaterol	CC[C@@H]([C@@H](c1ccc(c2c1ccc(=O)[nH]2)O)O)NC(C)C	Active	-2.22	8.22	Quinolines and derivatives	O=c1ccc2ccccc2[nH]1
380	CAS:27511-99-5	Eterobarb	CCC1(c2ccccc2)C(=O)N(COC)C(=O)N(C1=O)COC	Active	1.46	4.54	Diazines	O=C1NC(=O)C(c2ccccc2)C(=O)N1
381	CAS:121-81-3	Nitromide	NC(=O)c1cc(cc(c1)[N+](=O)[O-])[N+](=O)[O-]	Inactive	1.21	4.79	Benzene and substituted derivatives	c1ccccc1
382	CAS:621-23-8	1,3,5-Trimethoxybenzene	COc1cc(OC)cc(c1)OC	Inactive	1.03	4.97	Phenol ethers	c1ccccc1			fragrance
383	CAS:154598-52-4	Efavirenz	FC([C@@]1(C#CC2CC2)OC(=O)Nc2c1cc(Cl)cc2)(F)F	Active	1.06	4.94	Benzoxazines	O=C1Nc2ccccc2C(C#CC2CC2)O1
384	CAS:552-22-7	Thymol iodide	IOc1cc(C)c(cc1C(C)C)c1cc(C(C)C)c(cc1C)OI	Inactive	1.96	4.04	Benzene and substituted derivatives	c1ccc(-c2ccccc2)cc1
385	CAS:109826-26-8	Zaldaride	O=c1[nH]c2c(n1C1CCN(CC1)CC1(C)OCc3c(-n4c1ccc4)cccc3)cccc2	Active	1.52	4.48	Benzimidazoles	O=c1[nH]c2ccccc2n1C1CCN(CC2OCc3ccccc3-n3cccc32)CC1
386	CAS:31386-25-1	Indocate	CN(CCOC(=O)c1ccc2c(c1)c(C)c(n2Cc1ccccc1)C)C	Inactive	1.32	4.68	Indoles and derivatives	c1ccc(Cn2ccc3ccccc32)cc1
387	CAS:71653-63-9	Riodipine	COC(=O)C1=C(C)NC(=C(C1c1ccccc1OC(F)F)C(=O)OC)C	Inactive	1.39	4.61	Pyridines and derivatives	C1=CC(c2ccccc2)C=CN1
388	CAS:42779-82-8	Clopirac	OC(=O)Cc1cc(n(c1C)c1ccc(cc1)Cl)C	Active	1.37	4.63	Pyrroles	c1ccc(-n2cccc2)cc1
389	CAS:3563-14-2	Sulfasuccinamide	O=C(Nc1ccc(cc1)S(=O)(=O)N)CCC(=O)O	Inactive	1.05	4.95	Benzene and substituted derivatives	c1ccccc1
390	CAS:132203-70-4	Cilnidipine	COCCOC(=O)C1=C(C)NC(=C(C1c1cccc(c1)[N+](=O)[O-])C(=O)OC/C=C/c1ccccc1)C	Active	1.48	4.52	Pyridines and derivatives	O=C(OCC=Cc1ccccc1)C1=CNC=CC1c1ccccc1
391	CAS:829-74-3	Levonordefrin	C[C@@H]([C@@H](c1ccc(c(c1)O)O)O)N	Active	1.09	4.91	Benzene and substituted derivatives	c1ccccc1
392	CAS:59160-29-1	Lidofenin	O=C(Nc1c(C)cccc1C)CN(CC(=O)O)CC(=O)O	Inactive	-4.22	10.22	Carboxylic acids and derivatives	c1ccccc1
393	CAS:67-28-7	Nihydrazone	CC(=O)N/N=C/c1ccc(o1)[N+](=O)[O-]	Active	1.4	4.6	Furans	c1ccoc1
394	CAS:3270-71-1	Nifuraldezone	NC(=O)C(=O)NN=Cc1ccc(o1)[N+](=O)[O-]	Active	1.44	4.56	Carboxylic acids and derivatives	c1ccoc1
395	CAS:6236-05-1	Nifuroxime	[O-][N+](=O)c1ccc(o1)/C=N\O	Inactive	0.89	5.11	Furans	c1ccoc1
396	CAS:103890-78-4	Lacidipine	CCOC(=O)C1=C(C)NC(=C(C1c1ccccc1/C=C/C(=O)OC(C)(C)C)C(=O)OCC)C	Active	1.46	4.54	Cinnamic acids and derivatives	C1=CC(c2ccccc2)C=CN1
397	CAS:123318-82-1	Clofarabine	OC[C@H]1O[C@H]([C@H]([C@@H]1O)F)n1cnc2c1nc(Cl)nc2N	Inactive	1.03	4.97	Purine nucleosides	c1ncc2ncn(C3CCCO3)c2n1
398	CAS:141505-33-1	Levosimendan	N#CC(=NNc1ccc(cc1)C1=NNC(=O)C[C@H]1C)C#N	Active	0.07	5.93	Benzene and substituted derivatives	O=C1CCC(c2ccccc2)=NN1
399	CAS:90729-43-4	Ebastine	O=C(c1ccc(cc1)C(C)(C)C)CCCN1CCC(CC1)OC(c1ccccc1)c1ccccc1	Active	1.1	4.9	Benzene and substituted derivatives	O=C(CCCN1CCC(OC(c2ccccc2)c2ccccc2)CC1)c1ccccc1
400	CAS:60282-87-3	Gestodene	C#C[C@]1(O)C=C[C@@H]2[C@]1(CC)CC[C@H]1[C@H]2CCC2=CC(=O)CC[C@H]12	Active	1.44	4.56	Steroids and steroid derivatives	O=C1C=C2CCC3C4C=CCC4CCC3C2CC1
401	CAS:886-38-4	Diphenylcyclopropenone	O=C1C(=C1c1ccccc1)c1ccccc1	Inactive	1.27	4.73	Benzene and substituted derivatives	O=c1c(-c2ccccc2)c1-c1ccccc1
402	CAS:152-43-2	Quinestrol	C#C[C@]1(O)CC[C@@H]2[C@]1(C)CC[C@H]1[C@H]2CCc2c1ccc(c2)OC1CCCC1	Active	1.16	4.84	Steroids and steroid derivatives	c1cc2c(cc1OC1CCCC1)CCC1C2CCC2CCCC21
403	CAS:38083-17-9	Climbazole	Clc1ccc(cc1)OC(C(=O)C(C)(C)C)n1cncc1	Active	1.63	4.37	Phenol ethers	c1ccc(OCn2ccnc2)cc1			biocide|cleaning agent, humectant|preservative	personal care
404	CAS:65899-73-2	Tioconazole	Clc1ccc(c(c1)Cl)C(Cn1ccnc1)OCc1ccsc1Cl	Active	1.42	4.58	Benzene and substituted derivatives	c1ccc(C(Cn2ccnc2)OCc2ccsc2)cc1
405	CAS:112965-21-6	Calcipotriene	O[C@H]1C[C@H](O)C(=C)/C(=C\C=C\2/CCC[C@]3([C@H]2CC[C@@H]3[C@@H](/C=C/[C@H](C2CC2)O)C)C)/C1	Active	1.41	4.59	Steroids and steroid derivatives	C=C1CCCCC1=CC=C1CCCC2C(CC=CCC3CC3)CCC12
406	CAS:82186-77-4	Lumefantrine	CCCCN(CC(c1cc(Cl)cc2c1-c1ccc(cc1/C/2=C/c1ccc(cc1)Cl)Cl)O)CCCC	Inactive	1.32	4.68	Fluorenes	C(=C1c2ccccc2-c2ccccc21)c1ccccc1	yes
407	CAS:78613-35-1	Amorolfine	CCC(c1ccc(cc1)CC(CN1C[C@H](C)O[C@@H](C1)C)C)(C)C	Inactive	-2.69	8.69	Benzene and substituted derivatives	c1ccc(CCCN2CCOCC2)cc1
408	CAS:118292-40-3	Tazarotene	CCOC(=O)c1ccc(nc1)C#Cc1ccc2c(c1)C(C)(C)CCS2	Active	1.55	4.45	Prenol lipids	C(#Cc1ccccn1)c1ccc2c(c1)CCCS2
409	CAS:3735-85-1	Mefeserpine	COc1ccc(cc1)OCC(=O)O[C@@H]1C[C@@H]2CN3CCc4c([C@H]3C[C@@H]2[C@@H]([C@H]1OC)C(=O)OC)[nH]c1c4ccc(c1)OC	Inactive	1.5	4.5	Yohimbine alkaloids	O=C(COc1ccccc1)OC1CCC2CC3c4[nH]c5ccccc5c4CCN3CC2C1
410	CAS:71119-11-4	Bucindolol	N#Cc1ccccc1OCC(CNC(Cc1c[nH]c2c1cccc2)(C)C)O	Inactive	1.38	4.62	Indoles and derivatives	c1ccc(OCCCNCCc2c[nH]c3ccccc23)cc1
411	CAS:99755-59-6	Rotigotine	CCCN([C@H]1CCc2c(C1)cccc2O)CCc1cccs1	Active	1.41	4.59	Tetralins	c1csc(CCNC2CCc3ccccc3C2)c1
412	CAS:620-40-6	Tribenzylamine	c1ccc(cc1)CN(Cc1ccccc1)Cc1ccccc1	Active	1.34	4.66	Benzene and substituted derivatives	c1ccc(CN(Cc2ccccc2)Cc2ccccc2)cc1
413	CAS:469-61-4	(-)-alpha-Cedrene	CC1=CC[C@@]23C[C@@H]1C(C)(C)[C@@H]2CC[C@H]3C	Inactive	1.93	4.07	Prenol lipids	C1=CC2CC3CCCC3(C1)C2			fragrance	cleaning products and household care|vehicle
414	CAS:4630-07-3	Valencene	CC(=C)[C@@H]1CCC2=CCC[C@H]([C@@]2(C1)C)C	Active	1.8	4.2	Prenol lipids	C1=C2CCCCC2CCC1			fragrance
415	CAS:36431-72-8	Theaspirane	CC1CCC2(O1)C(=CCCC2(C)C)C	Inactive	1.62	4.38	Tetrahydrofurans	C1=CC2(CCC1)CCCO2			fragrance
416	CAS:472-66-2	2,6,6-Trimethyl-1-cyclohexene-1-acetaldehyde	O=CCC1=C(C)CCCC1(C)C	Active	1.43	4.57	Organooxygen compounds	C1=CCCCC1			fragrance
417	CAS:515-03-7	Sclareol	C=C[C@@](CC[C@H]1[C@](C)(O)CC[C@@H]2[C@]1(C)CCCC2(C)C)(O)C	Active	1.2	4.8	Prenol lipids	C1CCC2CCCCC2C1			fragrance
418	CAS:4265-16-1	2-Benzofurancarboxaldehyde	O=Cc1cc2c(o1)cccc2	Inactive	1.35	4.65	Benzofurans	c1ccc2occc2c1
419	CAS:17283-81-7	Dihydro-beta-ionone	CC(=O)CCC1=C(C)CCCC1(C)C	Inactive	1.63	4.37	Prenol lipids	C1=CCCCC1			fragrance	cleaning products and household care|vehicle
420	CAS:60125-24-8	trans-2-Methoxycinnamaldehyde	O=C/C=C/c1ccccc1OC	Active	1.81	4.19	Cinnamaldehydes	c1ccccc1
421	NOCAS_47248	CI-1018	Cc1cc2CCN3c2c(c1)C(=N[C@H](C3=O)NC(=O)c1ccncc1)c1ccccc1	Inactive	1.79	4.21	Carboxylic acids and derivatives	O=C(NC1N=C(c2ccccc2)c2cccc3c2N(CC3)C1=O)c1ccncc1
422	CAS:230954-09-3	CP-544439	ONC(=O)C1(CCOCC1)NS(=O)(=O)c1ccc(cc1)Oc1ccc(cc1)F	Inactive	1.49	4.51	Benzene and substituted derivatives	O=S(=O)(NC1CCOCC1)c1ccc(Oc2ccccc2)cc1
423	CAS:289716-94-5	CP-607366	CNCc1cc(F)ccc1Oc1ccc(c(c1)Cl)Cl	Active	1.61	4.39	Benzene and substituted derivatives	c1ccc(Oc2ccccc2)cc1
424	CAS:445295-04-5	CP-671305	C[C@H](C(=O)O)Oc1ccc(c(c1)F)CNC(=O)c1cccnc1Oc1ccc2c(c1)OCO2	Inactive	0.4	5.6	Benzene and substituted derivatives	O=C(NCc1ccccc1)c1cccnc1Oc1ccc2c(c1)OCO2
425	CAS:123122-55-4	Candoxatril	COCCOC[C@@H](C(=O)Oc1ccc2c(c1)CCC2)CC1(CCCC1)C(=O)N[C@@H]1CC[C@@H](CC1)C(=O)O	Active	1.61	4.39	Indanes	O=C(CCC1(C(=O)NC2CCCCC2)CCCC1)Oc1ccc2c(c1)CCC2
426	CAS:402910-27-4	UK-416244	CSc1ccc(cc1C)Oc1ccc(cc1CN(C)C)S(=O)(=O)N	Active	1.88	4.12	Benzene and substituted derivatives	c1ccc(Oc2ccccc2)cc1
427	NOCAS_47330	PharmaGSID_47330	N#Cc1cccc(c1c1cc(ccc1F)c1cnc2n1ncc(n2)C(O)(C)C)F	Inactive	1.17	4.83	Benzene and substituted derivatives	c1ccc(-c2cccc(-c3cnc4nccnn34)c2)cc1
428	CAS:189003-92-7	Trelanserin	NC(=O)Cn1c(=O)cc(c2c1cc(F)cc2)CCN1CCN(CC1)c1nccc2c1ccs2	Inactive	-1.6	7.6	Diazinanes	O=c1cc(CCN2CCN(c3nccc4sccc34)CC2)c2ccccc2[nH]1
429	CAS:725228-45-5	AVE5638	NCc1cccc(c1)C1CCN(CC1)C(=O)c1ccc(o1)C#Cc1ccccc1F	Active	0.83	5.17	Piperidines	O=C(c1ccc(C#Cc2ccccc2)o1)N1CCC(c2ccccc2)CC1
430	CID:560105	2,4-DB-isooctyl ester	CC(CCCCCOC(=O)CCCOc1ccc(cc1Cl)Cl)C	Inactive	-2.38	8.38	Benzene and substituted derivatives	c1ccccc1
431	CAS:13466-78-9	3-Carene	CC1=CCC2C(C1)C2(C)C	Inactive	1.6	4.4	Prenol lipids	C1=CCC2CC2C1			fragrance	cleaning products and household care	Evaluation of a Medicinal Cannabis Manufacturing Facility with an Indoor and Outdoor Grow Operation
432	CAS:2219-82-1	2-tert-Butyl-6-methylphenol	Cc1cccc(c1O)C(C)(C)C	Inactive	1.71	4.29	Benzene and substituted derivatives	c1ccccc1			fragrance
433	CAS:1162-06-7	Triphenyllead acetate	CC(=O)O[Pb](c1ccccc1)(c1ccccc1)c1ccccc1	Inactive	0.61	5.39	Benzene and substituted derivatives	c1ccc([PbH](c2ccccc2)c2ccccc2)cc1
434	CAS:6624-73-3	Pentane-1,5-diyl dibenzoate	O=C(c1ccccc1)OCCCCCOC(=O)c1ccccc1	Inactive	-2.8	8.8	Benzene and substituted derivatives	O=C(OCCCCCOC(=O)c1ccccc1)c1ccccc1
435	CAS:2443-58-5	2-Hydroxyfluorene	Oc1ccc2-c3c(Cc2c1)cccc3	Inactive	1.89	4.11	Fluorenes	c1ccc2c(c1)Cc1ccccc1-2
436	CAS:484-17-3	9-Phenanthrol	Oc1cc2ccccc2c2c1cccc2	Active	1.49	4.51	Phenanthrenes and derivatives	c1ccc2c(c1)ccc1ccccc12
437	CAS:104-53-0	3-Phenylpropanal	O=CCCc1ccccc1	Active	1.73	4.27	Benzene and substituted derivatives	c1ccccc1			fragrance	cleaning products and household care
438	CAS:564-20-5	(3aR)-(+)-Sclareolide	O=C1C[C@H]2[C@@](O1)(C)CC[C@@H]1[C@]2(C)CCCC1(C)C	Active	1.45	4.55	Naphthofurans	O=C1CC2C(CCC3CCCCC32)O1			fragrance
439	CAS:63449-68-3	Naphthalen-2-yl 2-aminobenzoate	O=C(c1ccccc1N)Oc1ccc2c(c1)cccc2	Inactive	1.9	4.1	Naphthalenes	O=C(Oc1ccc2ccccc2c1)c1ccccc1			fragrance
440	CAS:4640-01-1	Methyl triclosan	COc1cc(Cl)ccc1Oc1ccc(cc1Cl)Cl	Active	0.19	5.81	Benzene and substituted derivatives	c1ccc(Oc2ccccc2)cc1
441	CAS:2664-60-0	Dodecylparaben	CCCCCCCCCCCCOC(=O)c1ccc(cc1)O	Inactive	0.77	5.23	Benzene and substituted derivatives	c1ccccc1
442	CAS:38713-56-3	Nonylparaben	CCCCCCCCCOC(=O)c1ccc(cc1)O	Active	1.82	4.18	Benzene and substituted derivatives	c1ccccc1
443	CAS:79-97-0	3,3'-Dimethylbisphenol A	Oc1ccc(cc1C)C(c1ccc(c(c1)C)O)(C)C	Active	1.55	4.45	Benzene and substituted derivatives	c1ccc(Cc2ccccc2)cc1
444	CAS:2081-08-5	Bisphenol E	CC(c1ccc(cc1)O)c1ccc(cc1)O	Inactive	2.33	3.67	Benzene and substituted derivatives	c1ccc(Cc2ccccc2)cc1	yes
445	CAS:1943-97-1	4,4'-Octahydro-1H-4,7-methanoindene-5,5-diyldiphenol	Oc1ccc(cc1)C1(CC2CC1C1C2CCC1)c1ccc(cc1)O	Active	1.68	4.32	Benzene and substituted derivatives	c1ccc(C2(c3ccccc3)CC3CC2C2CCCC32)cc1	yes
446	CAS:36861-47-9	Enzacamene	Cc1ccc(cc1)C=C1C(=O)C2C(C1CC2)(C)C	Active	1.64	4.36	Prenol lipids	O=C1C(=Cc2ccccc2)C2CCC1C2	yes		UV stabilizer|fragrance
447	CAS:2664-63-3	4,4'-Thiodiphenol	Oc1ccc(cc1)Sc1ccc(cc1)O	Active	1.62	4.38	Thioethers	c1ccc(Sc2ccccc2)cc1	yes
448	CAS:843-55-0	Bisphenol Z	Oc1ccc(cc1)C1(CCCCC1)c1ccc(cc1)O	Active	1.67	4.33	Benzene and substituted derivatives	c1ccc(C2(c3ccccc3)CCCCC2)cc1	yes
449	CAS:5613-46-7	4,4'-Propane-2,2-diylbis(2,6-dimethylphenol)	CC(c1cc(C)c(c(c1)C)O)(c1cc(C)c(c(c1)C)O)C	Active	1.62	4.38	Benzene and substituted derivatives	c1ccc(Cc2ccccc2)cc1	yes
450	CAS:174185-16-1	FR167356	O=C(c1c(Cl)cccc1Cl)Nc1cccc2c1oc(c2C(O)(C)C)C	Inactive	1.66	4.34	Benzene and substituted derivatives	O=C(Nc1cccc2ccoc12)c1ccccc1
451	CAS:13680-35-8	4,4'-Methylenebis(2,6-diethylaniline)	CCc1cc(Cc2cc(CC)c(c(c2)CC)N)cc(c1N)CC	Inactive	1.91	4.09	Benzene and substituted derivatives	c1ccc(Cc2ccccc2)cc1
452	CAS:18979-55-0	4-(Hexyloxy)phenol	CCCCCCOc1ccc(cc1)O	Inactive	-0.12	6.12	Phenols	c1ccccc1
453	CAS:825643-57-0	PharmaGSID_48513	OC[C@@H]1[C@H](O)CCN1c1ncc(c(c1)c1ccc(cc1C)F)N(C(=O)C(c1cc(cc(c1)C(F)(F)F)C(F)(F)F)(C)C)C	Inactive	1.3	4.7	Pyridines and derivatives	O=C(Cc1ccccc1)Nc1cnc(N2CCCC2)cc1-c1ccccc1
454	CAS:686756-87-6	PharmaGSID_48519	OCC1COc2c(O1)ccc(c2)Nc1ncc2c(n1)N(C)C(=O)N(C2)c1ccccc1Br	Inactive	1.54	4.46	Benzodioxanes	O=C1Nc2nc(Nc3ccc4c(c3)OCCO4)ncc2CN1c1ccccc1
455	CAS:86780-90-7	Aranidipine	COC(=O)C1=C(C)NC(=C(C1c1ccccc1[N+](=O)[O-])C(=O)OCC(=O)C)C	Active	1.19	4.81	Pyridines and derivatives	C1=CC(c2ccccc2)C=CN1
456	CAS:86197-47-9	Dopexamine	Oc1cc(CCNCCCCCCNCCc2ccccc2)ccc1O	Active	0.28	5.72	Phenols	c1ccc(CCNCCCCCCNCCc2ccccc2)cc1
457	CAS:1092351-67-1	PP242	Oc1ccc2c(c1)cc([nH]2)c1nn(c2c1c(N)ncn2)C(C)C	Active	1.14	4.86	Indoles and derivatives	c1ccc2[nH]c(-c3n[nH]c4ncncc34)cc2c1
458	CAS:99-45-6	Adrenone	CNCC(=O)c1ccc(c(c1)O)O	Active	0.3	5.7	Organooxygen compounds	c1ccccc1
459	CAS:94-37-1	Dicyclopentamethylenethiuram disulfide	S=C(N1CCCCC1)SSC(=S)N1CCCCC1	Inactive	1.66	4.34	Organonitrogen compounds	S=C(SSC(=S)N1CCCCC1)N1CCCCC1
460	CAS:114856-44-9	Oberadilol	OC(COc1cc(Cl)ccc1C#N)CNC(CNc1ccc(cc1)C1=NNC(=O)CC1C)(C)C	Active	0.1	5.9	Phenol ethers	O=C1CCC(c2ccc(NCCNCCCOc3ccccc3)cc2)=NN1
461	CAS:101001-34-7	Pamicogrel	CCOC(=O)Cn1cccc1c1nc(c(s1)c1ccc(cc1)OC)c1ccc(cc1)OC	Active	0.55	5.45	Carboxylic acids and derivatives	c1ccc(-c2nc(-c3ccc[nH]3)sc2-c2ccccc2)cc1
462	CAS:134865-33-1	Meluadrine	Oc1ccc(c(c1)Cl)[C@H](CNC(C)(C)C)O	Active	-2.28	8.28	Phenols	c1ccccc1
463	CAS:33765-68-3	Oxendolone	CC[C@H]1C[C@@H]2[C@]([C@H]1O)(C)CC[C@H]1[C@H]2CCC2=CC(=O)CC[C@H]12	Inactive	1.07	4.93	Steroids and steroid derivatives	O=C1C=C2CCC3C4CCCC4CCC3C2CC1
464	CAS:86-12-4	Thenalidine	CN1CCC(CC1)N(c1ccccc1)Cc1cccs1	Active	1.6	4.4	Organonitrogen compounds	c1ccc(N(Cc2cccs2)C2CCNCC2)cc1
465	CAS:7195-27-9	Mefruside	Clc1ccc(cc1S(=O)(=O)N)S(=O)(=O)N(CC1(C)CCCO1)C	Inactive	1.87	4.13	Benzene and substituted derivatives	O=S(=O)(NCC1CCCO1)c1ccccc1
466	CAS:285983-48-4	Doramapimod	O=C(Nc1cc(nn1c1ccc(cc1)C)C(C)(C)C)Nc1ccc(c2c1cccc2)OCCN1CCOCC1	Active	1.38	4.62	Azoles	O=C(Nc1ccc(OCCN2CCOCC2)c2ccccc12)Nc1ccnn1-c1ccccc1
467	CAS:39731-05-0	SDZ 21009	OC(COc1cccc2c1cc([nH]2)C(=O)OC(C)C)CNC(C)(C)C	Active	1.34	4.66	Indoles and derivatives	c1ccc2[nH]ccc2c1
468	CAS:10527-16-9	10-Chloro-9-anthraldehyde	O=Cc1c2ccccc2c(c2c1cccc2)Cl	Inactive	2.19	3.81	Anthracenes	c1ccc2cc3ccccc3cc2c1
469	CAS:1210-39-5	3,3-Diphenylacrylaldehyde	O=CC=C(c1ccccc1)c1ccccc1	Active	1.8	4.2	Benzene and substituted derivatives	C=C(c1ccccc1)c1ccccc1
470	CAS:1468-95-7	9-Anthracenemethanol	OCc1c2ccccc2cc2c1cccc2	Active	1.69	4.31	Anthracenes	c1ccc2cc3ccccc3cc2c1
471	CAS:2835-99-6	4-Amino-m-cresol	Oc1ccc(c(c1)C)N	Inactive	1.56	4.44	Phenols	c1ccccc1				personal care
472	CAS:605-32-3	2-Hydroxyanthraquinone	Oc1ccc2c(c1)C(=O)c1c(C2=O)cccc1	Inactive	0.48	5.52	Anthracenes	O=C1c2ccccc2C(=O)c2ccccc21
473	CAS:92146-82-2	tert-Butyl-3-aminobenzoate	Nc1cccc(c1)C(=O)OC(C)(C)C	Inactive	1.9	4.1	Benzene and substituted derivatives	c1ccccc1
474	CAS:494-19-9	10,11-Dihydro-5H-dibenz[b,f]azepine	c1ccc2c(c1)Nc1ccccc1CC2	Active	1.62	4.38	Benzazepines	c1ccc2c(c1)CCc1ccccc1N2
475	CAS:541-59-3	Maleimide	O=C1C=CC(=O)N1	Active	0.92	5.08	Pyrrolidines	O=C1C=CC(=O)N1
476	CAS:70-11-1	2-Bromoacetophenone	BrCC(=O)c1ccccc1	Active	1.46	4.54	Organooxygen compounds	c1ccccc1
477	CAS:84-79-7	Lapachol	CC(=CCC1=C(O)C(=O)c2c(C1=O)cccc2)C	Active	1.53	4.47	Prenol lipids	O=C1C=CC(=O)c2ccccc21
478	CAS:92-43-3	3-Pyrazolidinone,1-phenyl-	O=C1CCN(N1)c1ccccc1	Inactive	1.14	4.86	Benzene and substituted derivatives	O=C1CCN(c2ccccc2)N1
479	CAS:4221-68-5	1,1-Bis(3-cyclohexyl-4-hydroxyphenyl)cyclohexane	Oc1ccc(cc1C1CCCCC1)C1(CCCCC1)c1ccc(c(c1)C1CCCCC1)O	Active	0.9	5.1	Benzene and substituted derivatives	c1cc(C2CCCCC2)cc(C2(c3cccc(C4CCCCC4)c3)CCCCC2)c1
480	CAS:1571-75-1	4,4'-(1-Phenylethylidene)bisphenol	Oc1ccc(cc1)C(c1ccc(cc1)O)(c1ccccc1)C	Active	1.68	4.32	Triphenyl compounds	c1ccc(C(c2ccccc2)c2ccccc2)cc1	yes
481	CAS:13080-86-9	4,4'-(Isopropylidenebis(4,1-phenyleneoxy))dianiline	CC(c1ccc(cc1)Oc1ccc(cc1)N)(c1ccc(cc1)Oc1ccc(cc1)N)C	Active	1.51	4.49	Benzene and substituted derivatives	c1ccc(Oc2ccc(Cc3ccc(Oc4ccccc4)cc3)cc2)cc1
482	CAS:1942-71-8	2-(4-tert-Butylphenoxy)cyclohexanol	OC1CCCCC1Oc1ccc(cc1)C(C)(C)C	Active	1.88	4.12	Benzene and substituted derivatives	c1ccc(OC2CCCCC2)cc1
483	CAS:2648-61-5	2,2-Dichloro-1-phenylethanone	ClC(C(=O)c1ccccc1)Cl	Inactive	1.6	4.4	Organooxygen compounds	c1ccccc1
484	CAS:603-36-1	Triphenylstibine	c1ccc(cc1)[Sb](c1ccccc1)c1ccccc1	Inactive	1.92	4.08	Benzene and substituted derivatives	c1ccc([Sb](c2ccccc2)c2ccccc2)cc1
485	CAS:93-53-8	Hydratropaldehyde	O=CC(c1ccccc1)C	Active	2.18	3.82	Benzene and substituted derivatives	c1ccccc1			fragrance	cleaning products and household care
486	CAS:10539-19-2	Moxaverine	CCc1cc2cc(OC)c(cc2c(n1)Cc1ccccc1)OC	Inactive	1.6	4.4	Isoquinolines and derivatives	c1ccc(Cc2nccc3ccccc23)cc1
487	CAS:119356-77-3	Dapoxetine	CN([C@H](c1ccccc1)CCOc1cccc2c1cccc2)C	Active	1.56	4.44	Naphthalenes	c1ccc(CCCOc2cccc3ccccc23)cc1
488	CAS:130726-68-0	Neticonazole	CCCCCOc1ccccc1/C(=C\SC)/n1cncc1	Active	1.37	4.63	Phenol ethers	C=C(c1ccccc1)n1ccnc1
489	CAS:133-58-4	Nitromersol	[O-][N+](=O)c1ccc(c2c1[Hg]O2)C	Inactive	0.42	5.58	Benzene and substituted derivatives	c1ccc2c(c1)O[Hg]2
490	CAS:139-62-8	Cyclomethycaine	CC1CCCCN1CCCOC(=O)c1ccc(cc1)OC1CCCCC1	Active	1.55	4.45	Benzene and substituted derivatives	O=C(OCCCN1CCCCC1)c1ccc(OC2CCCCC2)cc1
491	CAS:1458-18-0	Methyl 3-amino-5,6-dichloropyrazine-2-carboxylate	COC(=O)c1nc(Cl)c(nc1N)Cl	Active	2	4	Diazines	c1cnccn1
492	CAS:15351-09-4	Metamfepramone	CC(C(=O)c1ccccc1)N(C)C	Inactive	1.29	4.71	Organooxygen compounds	c1ccccc1
493	CAS:1620-98-0	3,5-Di-tert-butyl-4-hydroxybenzaldehyde	O=Cc1cc(c(c(c1)C(C)(C)C)O)C(C)(C)C	Active	2.2	3.8	Organooxygen compounds	c1ccccc1
494	CAS:180200-68-4	Tilmacoxib	Cc1nc(c(o1)c1ccc(c(c1)F)S(=O)(=O)N)C1CCCCC1	Inactive	1.66	4.34	Azoles	c1ccc(-c2ocnc2C2CCCCC2)cc1
495	CAS:2226-11-1	Bornelone	CC(=O)/C=C/C=C\1/C2CCC(C1(C)C)C2	Active	1.33	4.67	Prenol lipids	C=C1CC2CCC1C2			UV stabilizer
496	CAS:2236-31-9	Estriol tripropionate	CCC(=O)Oc1ccc2c(c1)CC[C@@H]1[C@@H]2CC[C@]2([C@H]1C[C@H]([C@@H]2OC(=O)CC)OC(=O)CC)C	Inactive	1.86	4.14	Steroids and steroid derivatives	c1ccc2c(c1)CCC1C2CCC2CCCC21
497	CAS:2508-47-6	Estriol benzoate diacetate	CC(=O)O[C@@H]1CC2C([C@H]1OC(=O)C)(C)CCC1C2CCc2c1ccc(c2)OC(=O)c1ccccc1	Inactive	1.17	4.83	Steroids and steroid derivatives	O=C(Oc1ccc2c(c1)CCC1C2CCC2CCCC21)c1ccccc1
498	CAS:4945-47-5	Bamipine	CN1CCC(CC1)N(c1ccccc1)Cc1ccccc1	Active	1.25	4.75	Benzene and substituted derivatives	c1ccc(CN(c2ccccc2)C2CCNCC2)cc1
499	CAS:509-78-4	Dimenoxadol	CCOC(c1ccccc1)(c1ccccc1)C(=O)OCCN(C)C	Inactive	1.33	4.67	Benzene and substituted derivatives	c1ccc(Cc2ccccc2)cc1
500	CAS:519-88-0	Ambucetamide	CCCCN(C(c1ccc(cc1)OC)C(=O)N)CCCC	Inactive	1.67	4.33	Carboxylic acids and derivatives	c1ccccc1
501	CAS:5579-81-7	Isalon	NC(=O)NC1N=C(NC1=O)O[Al](O)O	Inactive	1.36	4.64	Carboxylic acids and derivatives	O=C1CN=CN1			biocide|dehydrating agent
502	CAS:67765-04-2	Enefexine	CCc1ccc(cc1)C1CCNCC1	Inactive	1.28	4.72	Piperidines	c1ccc(C2CCNCC2)cc1
503	CAS:73573-42-9	Rescimetol	COc1ccc2c(c1)[nH]c1c2CCN2[C@@H]1C[C@H]1[C@@H](C2)C[C@H]([C@@H]([C@H]1C(=O)OC)OC)OC(=O)/C=C/c1ccc(c(c1)OC)O	Active	0.78	5.22	Yohimbine alkaloids	O=C(C=Cc1ccccc1)OC1CCC2CC3c4[nH]c5ccccc5c4CCN3CC2C1
504	CAS:73590-85-9	Omeprazole sulfide	COc1ccc2c(c1)nc([nH]2)SCc1ncc(c(c1C)OC)C	Inactive	0.44	5.56	Benzimidazoles	c1ccc(CSc2nc3ccccc3[nH]2)nc1
505	CAS:77181-69-2	Bravavir	Br/C=C\c1cn(c(=O)[nH]c1=O)[C@H]1O[C@@H]([C@H]([C@@H]1O)O)CO	Inactive	1.69	4.31	Pyrimidine nucleosides	O=c1ccn(C2CCCO2)c(=O)[nH]1
506	CAS:7761-45-7	Methodichlorophen	Nc1nc(C)c(c(n1)N)c1ccc(c(c1)Cl)Cl	Inactive	1.51	4.49	Benzene and substituted derivatives	c1ccc(-c2cncnc2)cc1
507	CAS:85801-02-1	Indomethacin farnesil	COc1ccc2c(c1)c(CC(=O)OC/C=C(/CC/C=C(/CCC=C(C)C)\C)\C)c(n2C(=O)c1ccc(cc1)Cl)C	Inactive	1.37	4.63	Indoles and derivatives	O=C(c1ccccc1)n1ccc2ccccc21
508	CAS:92-39-7	2-Chlorophenothiazine	Clc1ccc2c(c1)Nc1c(S2)cccc1	Inactive	1.67	4.33	Benzothiazines	c1ccc2c(c1)Nc1ccccc1S2
509	CAS:24038-68-4	BisOPP-A	Oc1ccc(cc1c1ccccc1)C(c1ccc(c(c1)c1ccccc1)O)(C)C	Active	0.55	5.45	Diarylheptanoids	c1ccc(-c2cccc(Cc3cccc(-c4ccccc4)c3)c2)cc1

## Sheet: Table S2
Table S2: Curated antagonist dataset of 650 chemicals for TSHR from ToxCast chemical library. For each chemical, the table provides the CAS identifier or PubChem compound identifier (CID), chemical name, Canonical SMILES generated using RDKit, mechanism of action, modl_ga (logarithm of AC50 value in micromolar concentration) value, computed pAC50 value. Further the table provides chemical class i…
Serial Number	Chemical Identifier	Chemical Name	Canonical SMILES	Mechanism of Action	modl_ga	pAC50	Chemical Class	Molecular Scaffold	Endocrine Disrupting Chemical	High Production Volume Chemical	Functional Use(s)	Product Use Composition(s)	Occupational Health Hazard Report(s)
1	CAS:17026-81-2	3-Amino-4-ethoxyacetanilide	CCOc1ccc(cc1N)NC(=O)C	Inactive	1.89	4.11	Benzene and substituted derivatives	c1ccccc1
2	CAS:97-56-3	2-Amino-5-azotoluene	Cc1cc(ccc1N)N=Nc1ccccc1C	Active	1.86	4.14	Azobenzenes	c1ccc(N=Nc2ccccc2)cc1
3	CID:38018	Aroclor 1260	Clc1c(ccc(c1Cl)Cl)c1ccc(c(c1Cl)Cl)Cl	Active	1.67	4.33	Benzene and substituted derivatives	c1ccc(-c2ccccc2)cc1				vehicle
4	CAS:68844-77-9	Astemizole	COc1ccc(cc1)CCN1CCC(CC1)Nc1nc2c(n1Cc1ccc(cc1)F)cccc2	Active	1.49	4.51	Benzimidazoles	c1ccc(CCN2CCC(Nc3nc4ccccc4n3Cc3ccccc3)CC2)cc1
5	CAS:103-33-3	Azobenzene	c1ccc(cc1)N=Nc1ccccc1	Inactive	1.94	4.06	Azobenzenes	c1ccc(N=Nc2ccccc2)cc1
6	CAS:92-87-5	Benzidine	Nc1ccc(cc1)c1ccc(cc1)N	Inactive	1.33	4.67	Benzene and substituted derivatives	c1ccc(-c2ccccc2)cc1				furniture and furnishings|laboratory supplies
7	CAS:613-94-5	Benzoyl hydrazine	NNC(=O)c1ccccc1	Inactive	-1.37	7.37	Benzene and substituted derivatives	c1ccccc1
8	CAS:76150-91-9	1,4-Bis[2-(3,5-dichloropyridyloxy)]benzene	Clc1cnc(c(c1)Cl)Oc1ccc(cc1)Oc1ncc(cc1Cl)Cl	Inactive	1.21	4.79	Organooxygen compounds	c1ccc(Oc2ccc(Oc3ccccn3)cc2)nc1
9	CAS:33229-34-4	HC Blue 2	OCCNc1ccc(cc1[N+](=O)[O-])N(CCO)CCO	Active	1.69	4.31	Benzene and substituted derivatives	c1ccccc1				personal care
10	CAS:2409-55-4	2-tert-Butyl-4-methylphenol	Cc1ccc(c(c1)C(C)(C)C)O	Inactive	1.82	4.18	Benzene and substituted derivatives	c1ccccc1		yes	fragrance
11	CID:8456	Butylated hydroxyanisole	COc1ccc(c(c1)C(C)(C)C)O	Inactive	0.7	5.3	Phenols	c1ccccc1	yes		antioxidant|fragrance	personal care
12	CAS:145040-37-5	Candesartan cilexetil	CCOc1nc2c(n1Cc1ccc(cc1)c1ccccc1c1nnn[nH]1)c(ccc2)C(=O)OC(OC(=O)OC1CCCCC1)C	Inactive	1.45	4.55	Benzene and substituted derivatives	O=C(OCOC(=O)c1cccc2ncn(Cc3ccc(-c4ccccc4-c4nnn[nH]4)cc3)c12)OC1CCCCC1
13	CAS:2425-06-1	Captafol	ClC(C(SN1C(=O)C2C(C1=O)CC=CC2)(Cl)Cl)Cl	Active	1.58	4.42	Isoindoles and derivatives	O=C1NC(=O)C2CC=CCC12	yes		biocide
14	CAS:133-06-2	Captan	ClC(SN1C(=O)C2C(C1=O)CC=CC2)(Cl)Cl	Active	1.69	4.31	Isoindoles and derivatives	O=C1NC(=O)C2CC=CCC12	yes		biocide	pesticides
15	CAS:118-75-2	Chloranil	ClC1=C(Cl)C(=O)C(=C(C1=O)Cl)Cl	Active	1.9	4.1	Organooxygen compounds	O=C1C=CC(=O)C=C1
16	CAS:302-22-7	Chlormadinone acetate	O=C1CC[C@]2(C(=C1)C(=C[C@@H]1[C@@H]2CC[C@]2([C@H]1CC[C@]2(OC(=O)C)C(=O)C)C)Cl)C	Active	1.68	4.32	Steroids and steroid derivatives	O=C1C=C2C=CC3C4CCCC4CCC3C2CC1
17	CAS:80-33-1	Chlorfenson	Clc1ccc(cc1)OS(=O)(=O)c1ccc(cc1)Cl	Inactive	1.72	4.28	Benzene and substituted derivatives	O=S(=O)(Oc1ccccc1)c1ccccc1			biocide
18	CAS:2227-13-6	Tetrasul	Clc1ccc(cc1)Sc1cc(Cl)c(cc1Cl)Cl	Inactive	1.82	4.18	Thioethers	c1ccc(Sc2ccccc2)cc1
19	CAS:87-29-6	Cinnamyl anthranilate	O=C(c1ccccc1N)OCC=Cc1ccccc1	Active	1.78	4.22	Benzene and substituted derivatives	O=C(OCC=Cc1ccccc1)c1ccccc1
20	CAS:56-72-4	Coumaphos	CCOP(=S)(Oc1ccc2c(c1)oc(=O)c(c2C)Cl)OCC	Active	1.41	4.59	Coumarins and derivatives	O=c1ccc2ccccc2o1			biocide
21	CAS:427-51-0	Cyproterone acetate	CC(=O)O[C@@]1(CC[C@@H]2[C@]1(C)CC[C@H]1[C@H]2C=C(C2=CC(=O)[C@H]3[C@@H]([C@]12C)C3)Cl)C(=O)C	Inactive	1.45	4.55	Steroids and steroid derivatives	O=C1C=C2C=CC3C4CCCC4CCC3C2C2CC12	yes
22	CAS:72-54-8	p,p'-DDD	ClC(C(c1ccc(cc1)Cl)c1ccc(cc1)Cl)Cl	Active	1.7	4.3	Benzene and substituted derivatives	c1ccc(Cc2ccccc2)cc1	yes
23	CAS:72-55-9	p,p'-DDE	ClC(=C(c1ccc(cc1)Cl)c1ccc(cc1)Cl)Cl	Active	1.45	4.55	Benzene and substituted derivatives	C=C(c1ccccc1)c1ccccc1	yes
24	CAS:50-29-3	Dichlorodiphenyltrichloroethane	ClC(C(c1ccc(cc1)Cl)c1ccc(cc1)Cl)(Cl)Cl	Active	1.75	4.25	Benzene and substituted derivatives	c1ccc(Cc2ccccc2)cc1	yes	yes	biocide	pesticides
25	CAS:853-23-6	Dehydroepiandrosterone acetate	CC(=O)O[C@H]1CC[C@]2(C(=CC[C@@H]3[C@@H]2CC[C@]2([C@H]3CCC2=O)C)C1)C	Active	2.01	3.99	Steroids and steroid derivatives	O=C1CCC2C1CCC1C3CCCCC3=CCC21
26	CAS:785-30-8	4,4'-Diaminobenzanilide	Nc1ccc(cc1)NC(=O)c1ccc(cc1)N	Inactive	2.37	3.63	Benzene and substituted derivatives	O=C(Nc1ccccc1)c1ccccc1
27	CAS:117-80-6	Dichlone	O=C1C(=C(Cl)C(=O)c2c1cccc2)Cl	Active	1.53	4.47	Naphthalenes	O=C1C=CC(=O)c2ccccc21			biocide
28	CAS:91-94-1	3,3'-Dichlorobenzidine	Nc1ccc(cc1Cl)c1ccc(c(c1)Cl)N	Active	1.76	4.24	Benzene and substituted derivatives	c1ccc(-c2ccccc2)cc1		yes		furniture and furnishings
29	CID:24678	2,4-D isooctyl ester	CC(CCCCCOC(=O)COc1ccc(cc1Cl)Cl)C	Inactive	1.84	4.16	Benzene and substituted derivatives	c1ccccc1		yes		landscape/yard
30	CAS:94-11-1	2,4-D isopropyl ester	CC(OC(=O)COc1ccc(cc1Cl)Cl)C	Inactive	1.98	4.02	Benzene and substituted derivatives	c1ccccc1				landscape/yard
31	CAS:97-16-5	2,4-Dichlorophenyl benzenesulfonate	Clc1ccc(c(c1)Cl)OS(=O)(=O)c1ccccc1	Inactive	0.64	5.36	Benzene and substituted derivatives	O=S(=O)(Oc1ccccc1)c1ccccc1
32	CAS:115-32-2	Dicofol	OC(C(Cl)(Cl)Cl)(c1ccc(cc1)Cl)c1ccc(cc1)Cl	Active	1.78	4.22	Benzene and substituted derivatives	c1ccc(Cc2ccccc2)cc1	yes	yes	biocide
33	CAS:1212-29-9	N,N'-Dicyclohexylthiourea	S=C(NC1CCCCC1)NC1CCCCC1	Inactive	1.78	4.22	Thioureas	S=C(NC1CCCCC1)NC1CCCCC1
34	CAS:2921-88-2	Chlorpyrifos	CCOP(=S)(Oc1nc(Cl)c(cc1Cl)Cl)OCC	Active	1.79	4.21	Organic thiophosphoric acids and derivatives	c1ccncc1	yes	yes	biocide	laboratory supplies|pesticides
35	CAS:60-11-7	4-(Dimethylamino)azobenzene	CN(c1ccc(cc1)N=Nc1ccccc1)C	Active	1.85	4.15	Azobenzenes	c1ccc(N=Nc2ccccc2)cc1
36	CAS:86-29-3	Diphenylacetonitrile	N#CC(c1ccccc1)c1ccccc1	Inactive	1.93	4.07	Benzene and substituted derivatives	c1ccc(Cc2ccccc2)cc1
37	CAS:102-09-0	Diphenylcarbonate	O=C(Oc1ccccc1)Oc1ccccc1	Inactive	1.74	4.26	Benzene and substituted derivatives	O=C(Oc1ccccc1)Oc1ccccc1		yes
38	CAS:72-20-8	Endrin	ClC1=C(Cl)[C@@]2(C([C@@]1(Cl)[C@H]1[C@@H]2[C@@H]2C[C@H]1[C@@H]1[C@H]2O1)(Cl)Cl)Cl	Inactive	-0.06	6.06	Prenol lipids	C1=CC2CC1C1C3CC(C4OC34)C21			biocide	landscape/yard
39	CAS:50-28-2	17beta-Estradiol	Oc1ccc2c(c1)CC[C@@H]1[C@@H]2CC[C@]2([C@H]1CC[C@@H]2O)C	Active	1.74	4.26	Steroids and steroid derivatives	c1ccc2c(c1)CCC1C2CCC2CCCC21				personal care
40	CAS:72-56-0	p,p'-Ethyl-DDD	CCc1ccc(cc1)C(c1ccc(cc1)CC)C(Cl)Cl	Active	1.82	4.18	Prenol lipids	c1ccc(Cc2ccccc2)cc1
41	CAS:297-76-7	Ethynodiol diacetate	C#C[C@@]1(CC[C@@H]2[C@]1(C)CC[C@H]1[C@H]2CCC2=C[C@H](CC[C@H]12)OC(=O)C)OC(=O)C	Active	1.09	4.91	Steroids and steroid derivatives	C1=C2CCC3C4CCCC4CCC3C2CCC1
42	CAS:55-38-9	Fenthion	CSc1ccc(cc1C)OP(=S)(OC)OC	Active	1.51	4.49	Organic thiophosphoric acids and derivatives	c1ccccc1		yes	biocide	pesticides
43	CAS:471-53-4	Glycyrrhetinic acid	O=C1C=C2[C@@H]3C[C@](C)(CC[C@]3(C)CC[C@]2([C@]2([C@H]1[C@@]1(C)CC[C@@H](C([C@@H]1CC2)(C)C)O)C)C)C(=O)O	Inactive	1.9	4.1	Prenol lipids	O=C1C=C2C3CCCCC3CCC2C2CCC3CCCCC3C12
44	CAS:517-28-2	Hematoxylin	Oc1cc2C[C@]3([C@@H](c2cc1O)c1ccc(c(c1OC3)O)O)O	Active	1.99	4.01	Benzopyrans	c1ccc2c(c1)CC1COc3ccccc3C21
45	CAS:70-30-4	Hexachlorophene	Clc1cc(Cl)c(c(c1O)Cc1c(O)c(Cl)cc(c1Cl)Cl)Cl	Inactive	-2.25	8.25	Benzene and substituted derivatives	c1ccc(Cc2ccccc2)cc1			preservative	arts and crafts/office supplies
46	CAS:148081-72-5	1-O-Hexyl-2,3,5-trimethylhydroquinone	CCCCCCOc1cc(C)c(c(c1C)C)O	Active	1.68	4.32	Phenols	c1ccccc1			UV stabilizer|antioxidant
47	CAS:26049-70-7	2-Hydrazino-4-(4-nitrophenyl)thiazole	NNc1scc(n1)c1ccc(cc1)[N+](=O)[O-]	Inactive	1.61	4.39	Benzene and substituted derivatives	c1ccc(-c2cscn2)cc1
48	CAS:143-50-0	Kepone	O=C1C2(Cl)C3(C4(C1(Cl)C1(C2(C3(Cl)C(C41Cl)(Cl)Cl)Cl)Cl)Cl)Cl	Active	1.99	4.01	Prenol lipids	O=C1C2C3C4CC5C3C1C5C42	yes
49	CAS:5834-17-3	2-Methoxy-3-aminodibenzofuran	COc1cc2c(cc1N)oc1c2cccc1	Inactive	1.83	4.17	Benzofurans	c1ccc2c(c1)oc1ccccc12
50	CAS:72-43-5	Methoxychlor	COc1ccc(cc1)C(C(Cl)(Cl)Cl)c1ccc(cc1)OC	Active	2.17	3.83	Benzene and substituted derivatives	c1ccc(Cc2ccccc2)cc1	yes		biocide	landscape/yard|pesticides
51	CAS:55-80-1	3'-Methyl-4-dimethylaminoazobenzene	Cc1cccc(c1)/N=N/c1ccc(cc1)N(C)C	Active	2.02	3.98	Azobenzenes	c1ccc(N=Nc2ccccc2)cc1
52	CAS:95-71-6	Methylhydroquinone	Oc1ccc(c(c1)C)O	Active	1.75	4.25	Phenols	c1ccccc1
53	CAS:50-07-7	Mitomycin C	CO[C@@]12[C@H]3N[C@H]3CN2C2=C([C@H]1COC(=O)N)C(=O)C(=C(C2=O)C)N	Inactive	1.48	4.52	Indoles and derivatives	O=C1C=CC(=O)C2=C1CC1C3NC3CN21
54	CAS:2243-62-1	1,5-Naphthalenediamine	Nc1cccc2c1cccc2N	Active	1.95	4.05	Naphthalenes	c1ccc2ccccc2c1		yes
55	CAS:5307-14-2	2-Nitro-1,4-phenylenediamine	Nc1ccc(c(c1)[N+](=O)[O-])N	Active	2.23	3.77	Benzene and substituted derivatives	c1ccccc1
56	CAS:1836-75-5	Nitrofen	Clc1ccc(c(c1)Cl)Oc1ccc(cc1)[N+](=O)[O-]	Inactive	1.71	4.29	Benzene and substituted derivatives	c1ccc(Oc2ccccc2)cc1	yes	yes
57	CAS:5632-47-3	N-Nitrosopiperazine	O=NN1CCNCC1	Inactive	-2.57	8.57	Diazinanes	C1CNCCN1
58	CAS:1825-21-4	Pentachloroanisole	COc1c(Cl)c(Cl)c(c(c1Cl)Cl)Cl	Inactive	1.66	4.34	Phenol ethers	c1ccccc1
59	CAS:82-68-8	Pentachloronitrobenzene	Clc1c(Cl)c([N+](=O)[O-])c(c(c1Cl)Cl)Cl	Inactive	1.88	4.12	Benzene and substituted derivatives	c1ccccc1				pesticides
60	CAS:62-38-4	Phenylmercuric acetate	CC(=O)O[Hg]c1ccccc1	Active	1.68	4.32	Benzene and substituted derivatives	c1ccccc1	yes	yes	preservative	home maintenance|pesticides
61	CAS:51-03-6	Piperonyl butoxide	CCCCOCCOCCOCc1cc2OCOc2cc1CCC	Active	1.98	4.02	Benzodioxoles	c1ccc2c(c1)OCO2			biocide	personal care|pesticides|pet care
62	CAS:120-62-7	Piperonyl sulfoxide	CCCCCCCCS(=O)C(Cc1ccc2c(c1)OCO2)C	Active	1.91	4.09	Benzodioxoles	c1ccc2c(c1)OCO2
63	CID:158629	Polybrominated biphenyls (PBB)	Brc1c(Br)ccc(c1Br)c1cc(Br)c(c(c1)Br)Br	Inactive	1.75	4.25	Benzene and substituted derivatives	c1ccc(-c2ccccc2)cc1	yes
64	CAS:2871-01-4	HC Red 3	OCCNc1ccc(cc1[N+](=O)[O-])N	Active	1.81	4.19	Benzene and substituted derivatives	c1ccccc1				personal care
65	CAS:100-42-5	Styrene	C=Cc1ccccc1	Inactive	-0.61	6.61	Benzene and substituted derivatives	c1ccccc1	yes	yes	binder|fragrance	cleaning products and household care|construction and building materials|electronics/small appliances|furniture and furnishings|home maintenance|manufactured formulations|personal care|vehicle	An evaluation of respiratory health at a syntactic foam manufacturing facility|Emissions Generated from the Laser Marking of Different Products|Evaluation of 3-D Printer Emissions and Personal Exposures at a Manufacturing Workplace|Evaluation of Dermal Ex
66	CAS:569-57-3	Chlorotrianisene	COc1ccc(cc1)C(=C(c1ccc(cc1)OC)Cl)c1ccc(cc1)OC	Inactive	1.06	4.94	Stilbenes	C(=C(c1ccccc1)c1ccccc1)c1ccccc1
67	CAS:15721-02-5	2,2',5,5'-Tetrachlorobenzidine	Clc1cc(N)c(cc1c1cc(Cl)c(cc1Cl)N)Cl	Active	1.69	4.31	Benzene and substituted derivatives	c1ccc(-c2ccccc2)cc1
68	CAS:116-29-0	Tetradifon	Clc1ccc(cc1)S(=O)(=O)c1cc(Cl)c(cc1Cl)Cl	Active	1.8	4.2	Benzene and substituted derivatives	O=S(=O)(c1ccccc1)c1ccccc1	yes		biocide
69	CAS:961-11-5	Tetrachlorovinphos	ClC=C(c1cc(Cl)c(cc1Cl)Cl)OP(=O)(OC)OC	Inactive	1.89	4.11	Benzene and substituted derivatives	c1ccccc1
70	CAS:900-95-8	Triphenyltin acetate	CC(=O)O[Sn](c1ccccc1)(c1ccccc1)c1ccccc1	Active	1.39	4.61	Benzene and substituted derivatives	c1ccc([SnH](c2ccccc2)c2ccccc2)cc1	yes
71	CAS:76-87-9	Triphenyltin hydroxide	O[Sn](c1ccccc1)(c1ccccc1)c1ccccc1	Active	1.08	4.92	Benzene and substituted derivatives	c1ccc([SnH](c2ccccc2)c2ccccc2)cc1	yes		biocide
72	CAS:2832-40-8	C.I. Disperse Yellow 3	CC(=O)Nc1ccc(cc1)/N=N/c1cc(C)ccc1O	Inactive	1.81	4.19	Azobenzenes	c1ccc(N=Nc2ccccc2)cc1
73	CAS:1072-67-9	5-Methyl-3-isoxazolamine	Nc1noc(c1)C	Inactive	-1.57	7.57	Imidolactams	c1cnoc1
74	CAS:58-27-5	Menadione	O=C1C=C(C)C(=O)c2c1cccc2	Active	1.8	4.2	Naphthalenes	O=C1C=CC(=O)c2ccccc21
75	CAS:83-88-5	Riboflavin	OC[C@H]([C@H]([C@H](Cn1c2-c(nc3c1cc(C)c(c3)C)c(=O)[nH]c(=O)n2)O)O)O	Inactive	1.03	4.97	Pteridines and derivatives	O=c1nc2[nH]c3ccccc3nc-2c(=O)[nH]1			dye
76	CAS:133-11-9	Phenyl 4-aminosalicylate	Nc1ccc(c(c1)O)C(=O)Oc1ccccc1	Inactive	1.72	4.28	Depsides and depsidones	O=C(Oc1ccccc1)c1ccccc1
77	CAS:608-71-9	Pentabromophenol	Brc1c(O)c(Br)c(c(c1Br)Br)Br	Inactive	2.06	3.94	Phenols	c1ccccc1
78	CAS:786-19-6	Carbophenothion	CCOP(=S)(OCC)SCSc1ccc(cc1)Cl	Active	1.58	4.42	Thioethers	c1ccccc1			biocide
79	CAS:882-33-7	Diphenyl disulfide	c1ccc(cc1)SSc1ccccc1	Inactive	1.13	4.87	Benzene and substituted derivatives	c1ccc(SSc2ccccc2)cc1
80	CAS:10453-86-8	Resmethrin	CC(=CC1C(C1(C)C)C(=O)OCc1coc(c1)Cc1ccccc1)C	Active	2	4	Prenol lipids	O=C(OCc1coc(Cc2ccccc2)c1)C1CC1			biocide	pesticides
81	CAS:15972-60-8	Alachlor	COCN(c1c(CC)cccc1CC)C(=O)CCl	Inactive	1.72	4.28	Benzene and substituted derivatives	c1ccccc1	yes	yes	biocide	landscape/yard
82	CAS:52645-53-1	Permethrin	ClC(=CC1C(C1(C)C)C(=O)OCc1cccc(c1)Oc1ccccc1)Cl	Inactive	1.54	4.46	Fatty Acyls	O=C(OCc1cccc(Oc2ccccc2)c1)C1CC1	yes		biocide|other	personal care|pesticides|pet care
83	CAS:3424-82-6	o,p'-DDE	Clc1ccc(cc1)C(=C(Cl)Cl)c1ccccc1Cl	Inactive	2.25	3.75	Benzene and substituted derivatives	C=C(c1ccccc1)c1ccccc1	yes
84	CAS:58-72-0	Triphenylethylene	c1ccc(cc1)C=C(c1ccccc1)c1ccccc1	Inactive	1.64	4.36	Stilbenes	C(=C(c1ccccc1)c1ccccc1)c1ccccc1
85	CAS:50471-44-8	Vinclozolin	C=CC1(C)OC(=O)N(C1=O)c1cc(Cl)cc(c1)Cl	Inactive	1.93	4.07	Benzene and substituted derivatives	O=C1COC(=O)N1c1ccccc1	yes	yes	biocide	pesticides
86	CAS:57-91-0	17alpha-Estradiol	Oc1ccc2c(c1)CC[C@@H]1[C@@H]2CC[C@]2([C@H]1CC[C@H]2O)C	Active	1.74	4.26	Steroids and steroid derivatives	c1ccc2c(c1)CCC1C2CCC2CCCC21
87	CAS:84-17-3	Dienestrol	CC=C(C(=CC)c1ccc(cc1)O)c1ccc(cc1)O	Inactive	1.37	4.63	Stilbenes	C=C(C(=C)c1ccccc1)c1ccccc1
88	CAS:68047-06-3	(Z)-4-Hydroxytamoxifen	CC/C(=C(\c1ccc(cc1)O)/c1ccc(cc1)OCCN(C)C)/c1ccccc1	Active	2	4	Stilbenes	C(=C(c1ccccc1)c1ccccc1)c1ccccc1	yes
89	CAS:491-80-5	Biochanin A	COc1ccc(cc1)c1coc2c(c1=O)c(O)cc(c2)O	Inactive	1.85	4.15	Isoflavonoids	O=c1c(-c2ccccc2)coc2ccccc12	yes		humectant
90	CAS:480-40-0	Chrysin	Oc1cc(O)c2c(c1)oc(cc2=O)c1ccccc1	Inactive	0.46	5.54	Flavonoids	O=c1cc(-c2ccccc2)oc2ccccc12	yes
91	CAS:835-11-0	2,2'-Dihydroxybenzophenone	Oc1ccccc1C(=O)c1ccccc1O	Inactive	2.03	3.97	Benzene and substituted derivatives	O=C(c1ccccc1)c1ccccc1
92	CAS:64706-54-3	Bepridil	CC(COCC(N1CCCC1)CN(c1ccccc1)Cc1ccccc1)C	Inactive	0.71	5.29	Benzene and substituted derivatives	c1ccc(CN(CCN2CCCC2)c2ccccc2)cc1
93	CAS:2152-44-5	Betamethasone valerate	CCCCC(=O)O[C@@]1([C@@H](C)C[C@@H]2[C@]1(C)C[C@H](O)[C@]1([C@H]2CCC2=CC(=O)C=C[C@]12C)F)C(=O)CO	Active	1.89	4.11	Steroids and steroid derivatives	O=C1C=CC2C(=C1)CCC1C3CCCC3CCC21
94	CAS:603-50-9	Bisacodyl	CC(=O)Oc1ccc(cc1)C(c1ccccn1)c1ccc(cc1)OC(=O)C	Inactive	0.47	5.53	Benzene and substituted derivatives	c1ccc(C(c2ccccc2)c2ccccn2)cc1
95	CAS:35941-65-2	Butriptyline	CN(CC(CC1c2ccccc2CCc2c1cccc2)C)C	Inactive	2.2	3.8	Dibenzocycloheptenes	c1ccc2c(c1)CCc1ccccc1C2
96	CAS:81409-90-7	Cabergoline	C=CCN1C[C@@H](C[C@H]2[C@H]1Cc1c[nH]c3c1c2ccc3)C(=O)N(C(=O)NCC)CCCN(C)C	Inactive	2.2	3.8	Ergoline and derivatives	c1cc2c3c(c[nH]c3c1)CC1NCCCC21
97	CAS:522-97-4	Canadine	COc1c(OC)ccc2c1CN1CCc3c(C1C2)cc1c(c3)OCO1	Inactive	1.42	4.58	Protoberberine alkaloids and derivatives	c1ccc2c(c1)CC1c3cc4c(cc3CCN1C2)OCO4
98	CAS:50-53-3	Chlorpromazine	CN(CCCN1c2ccccc2Sc2c1cc(Cl)cc2)C	Active	1.55	4.45	Benzothiazines	c1ccc2c(c1)Nc1ccccc1S2
99	CAS:113-59-7	Chlorprothixene	CN(CC/C=C/1\c2ccccc2Sc2c1cc(Cl)cc2)C	Inactive	1.72	4.28	Benzothiopyrans	C=C1c2ccccc2Sc2ccccc21
100	CAS:1260-17-9	Carminic acid	OC[C@H]1O[C@H]([C@@H]([C@H]([C@@H]1O)O)O)c1c(O)c2c(c(c1O)O)C(=O)c1c(C2=O)c(C)c(c(c1)O)C(=O)O	Active	1.65	4.35	Anthracenes	O=C1c2ccccc2C(=O)c2cc(C3CCCCO3)ccc21
101	CAS:81098-60-4	Cisapride	COC1CN(CCCOc2ccc(cc2)F)CCC1NC(=O)c1cc(Cl)c(cc1OC)N	Inactive	1.46	4.54	Phenol ethers	O=C(NC1CCN(CCCOc2ccccc2)CC1)c1ccccc1
102	CAS:303-49-1	Clomipramine	CN(CCCN1c2ccccc2CCc2c1cc(Cl)cc2)C	Active	1.68	4.32	Benzazepines	c1ccc2c(c1)CCc1ccccc1N2
103	CAS:5786-21-0	Clozapine	CN1CCN(CC1)C1=Nc2cc(Cl)ccc2Nc2c1cccc2	Inactive	1.91	4.09	Benzodiazepines	c1ccc2c(c1)N=C(N1CCNCC1)c1ccccc1N2
104	CAS:20830-81-3	Daunorubicin	COc1cccc2c1C(=O)c1c(C2=O)c(O)c2c(c1O)[C@@H](O[C@H]1C[C@H](N)[C@@H]([C@@H](O1)C)O)C[C@](C2)(O)C(=O)C	Inactive	1.75	4.25	Anthracyclines	O=C1c2ccccc2C(=O)c2cc3c(cc21)CCCC3OC1CCCCO1
105	CAS:17598-65-1	Deslanoside	OC[C@H]1O[C@@H](O[C@H]2[C@@H](O)C[C@@H](O[C@@H]2C)O[C@H]2[C@@H](O)C[C@@H](O[C@@H]2C)O[C@H]2[C@@H](O)C[C@@H](O[C@@H]2C)O[C@H]2CC[C@]3([C@@H](C2)CC[C@@H]2[C@@H]3C[C@@H](O)[C@]3([C@]2(O)CC[C@@H]3C2=CC(=O)OC2)C)C)[C@@H]([C@H]([C@@H]1O)O)O	Active	0.59	5.41	Steroids and steroid derivatives	O=C1C=C(C2CCC3C2CCC2C4CCC(OC5CCC(OC6CCC(OC7CCC(OC8CCCCO8)CO7)CO6)CO5)CC4CCC23)CO1
106	CAS:33755-46-3	Dexamethasone valerate	CCCCC(=O)O[C@@]1([C@H](C)C[C@@H]2[C@]1(C)C[C@H](O)[C@]1([C@H]2CCC2=CC(=O)C=C[C@]12C)F)C(=O)CO	Inactive	1.85	4.15	Steroids and steroid derivatives	O=C1C=CC2C(=C1)CCC1C3CCCC3CCC21
107	CAS:77-19-0	Dicyclomine	CCN(CCOC(=O)C1(CCCCC1)C1CCCCC1)CC	Inactive	1.67	4.33	Carboxylic acids and derivatives	C1CCC(C2CCCCC2)CC1
108	CAS:71-63-6	Digitoxin	O=C1OCC(=C1)[C@H]1CC[C@]2([C@]1(C)CC[C@H]1[C@H]2CC[C@H]2[C@]1(C)CC[C@@H](C2)O[C@H]1C[C@H](O)[C@@H]([C@H](O1)C)O[C@H]1C[C@H](O)[C@@H]([C@H](O1)C)O[C@H]1C[C@H](O)[C@@H]([C@H](O1)C)O)O	Active	0.01	5.99	Steroids and steroid derivatives	O=C1C=C(C2CCC3C2CCC2C4CCC(OC5CCC(OC6CCC(OC7CCCCO7)CO6)CO5)CC4CCC23)CO1
109	CAS:20830-75-5	Digoxin	O=C1OCC(=C1)[C@H]1CC[C@]2([C@]1(C)[C@H](O)C[C@H]1[C@H]2CC[C@H]2[C@]1(C)CC[C@@H](C2)O[C@H]1C[C@H](O)[C@@H]([C@H](O1)C)O[C@H]1C[C@H](O)[C@@H]([C@H](O1)C)O[C@H]1C[C@H](O)[C@@H]([C@H](O1)C)O)O	Active	-0.1	6.1	Steroids and steroid derivatives	O=C1C=C(C2CCC3C2CCC2C4CCC(OC5CCC(OC6CCC(OC7CCCCO7)CO6)CO5)CC4CCC23)CO1
110	CAS:54910-89-3	Fluoxetine	CNCCC(c1ccccc1)Oc1ccc(cc1)C(F)(F)F	Inactive	1.67	4.33	Benzene and substituted derivatives	c1ccc(COc2ccccc2)cc1	yes
111	CAS:69-23-8	Fluphenazine	OCCN1CCN(CC1)CCCN1c2ccccc2Sc2c1cc(cc2)C(F)(F)F	Inactive	1.69	4.31	Benzothiazines	c1ccc2c(c1)Sc1ccccc1N2CCCN1CCNCC1
112	CAS:17617-23-1	Flurazepam	CCN(CCN1C(=O)CN=C(c2c1ccc(c2)Cl)c1ccccc1F)CC	Inactive	1.65	4.35	Benzodiazepines	O=C1CN=C(c2ccccc2)c2ccccc2N1
113	CAS:3105-97-3	Hycanthone	CCN(CCNc1ccc(c2c1c(=O)c1c(s2)cccc1)CO)CC	Inactive	1.84	4.16	Thiochromenes	O=c1c2ccccc2sc2ccccc12
114	CAS:135-09-1	Hydroflumethiazide	FC(c1cc2NCNS(=O)(=O)c2cc1S(=O)(=O)N)(F)F	Inactive	-4.19	10.19	Thiadiazines	O=S1(=O)NCNc2ccccc21
115	CAS:64622-45-3	Ibuprofen piconol	CC(Cc1ccc(cc1)C(C(=O)OCc1ccccn1)C)C	Inactive	1.67	4.33	Prenol lipids	O=C(Cc1ccccc1)OCc1ccccn1
116	CAS:75695-93-1	Isradipine	COC(=O)C1=C(C)NC(=C(C1c1cccc2c1non2)C(=O)OC(C)C)C	Inactive	1.69	4.31	Benzoxadiazoles	C1=CC(c2cccc3nonc23)C=CN1
117	CAS:50-37-3	Lysergide	CCN(C(=O)[C@H]1CN(C)[C@H]2C(=C1)c1cccc3c1c(C2)c[nH]3)CC	Inactive	2.23	3.77	Ergoline and derivatives	C1=C2c3cccc4[nH]cc(c34)CC2NCC1
118	CAS:481-85-6	Menadiol	Oc1cc(C)c(c2c1cccc2)O	Active	1.43	4.57	Naphthalenes	c1ccc2ccccc2c1
119	CAS:29216-28-2	Mequitazine	c1ccc2c(c1)N(CC1CN3CCC1CC3)c1c(S2)cccc1	Active	1.75	4.25	Benzothiazines	c1ccc2c(c1)Sc1ccccc1N2CC1CN2CCC1CC2
120	CAS:5588-33-0	Mesoridazine	CN1CCCCC1CCN1c2ccccc2Sc2c1cc(cc2)S(=O)C	Inactive	1.39	4.61	Benzothiazines	c1ccc2c(c1)Sc1ccccc1N2CCC1CCCCN1
121	CAS:361-37-5	Methysergide	CC[C@H](NC(=O)[C@H]1CN(C)[C@H]2C(=C1)c1cccc3c1c(C2)cn3C)CO	Inactive	1.32	4.68	Ergoline and derivatives	C1=C2c3cccc4[nH]cc(c34)CC2NCC1
122	CAS:115-33-3	Oxyphenisatin acetate	CC(=O)Oc1ccc(cc1)C1(c2ccc(cc2)OC(=O)C)C(=O)Nc2c1cccc2	Inactive	0.68	5.32	Phenol esters	O=C1Nc2ccccc2C1(c1ccccc1)c1ccccc1
123	CAS:58-39-9	Perphenazine	OCCN1CCN(CC1)CCCN1c2ccccc2Sc2c1cc(Cl)cc2	Active	1.6	4.4	Benzothiazines	c1ccc2c(c1)Sc1ccccc1N2CCCN1CCNCC1
124	CAS:3819-00-9	Piperacetazine	OCCC1CCN(CC1)CCCN1c2ccccc2Sc2c1cc(cc2)C(=O)C	Active	2.2	3.8	Benzothiazines	c1ccc2c(c1)Sc1ccccc1N2CCCN1CCCCC1
125	CAS:466-06-8	Proscillaridin	O[C@H]1[C@H](O[C@H]2CC[C@]3(C(=C2)CC[C@@H]2[C@@H]3CC[C@]3([C@]2(O)CC[C@@H]3c2ccc(=O)oc2)C)C)O[C@H]([C@@H]([C@H]1O)O)C	Active	-0.52	6.52	Steroids and steroid derivatives	O=c1ccc(C2CCC3C2CCC2C4CCC(OC5CCCCO5)C=C4CCC23)co1
126	CAS:84449-90-1	Raloxifene	Oc1ccc2c(c1)sc(c2C(=O)c1ccc(cc1)OCCN1CCCCC1)c1ccc(cc1)O	Inactive	2.02	3.98	Organooxygen compounds	O=C(c1ccc(OCCN2CCCCC2)cc1)c1c(-c2ccccc2)sc2ccccc12	yes
127	CAS:91161-71-6	Terbinafine	CN(Cc1cccc2c1cccc2)C/C=C/C#CC(C)(C)C	Inactive	1.83	4.17	Naphthalenes	c1ccc2ccccc2c1
128	CAS:50679-08-8	Terfenadine	OC(c1ccc(cc1)C(C)(C)C)CCCN1CCC(CC1)C(c1ccccc1)(c1ccccc1)O	Active	1.72	4.28	Benzene and substituted derivatives	c1ccc(CCCCN2CCC(C(c3ccccc3)c3ccccc3)CC2)cc1
129	CAS:50-52-2	Thioridazine	CSc1ccc2c(c1)N(CCC1CCCCN1C)c1c(S2)cccc1	Active	1.58	4.42	Benzothiazines	c1ccc2c(c1)Sc1ccccc1N2CCC1CCCCN1
130	CAS:55142-85-3	Ticlopidine	Clc1ccccc1CN1CCc2c(C1)ccs2	Inactive	1.78	4.22	Thienopyridines	c1ccc(CN2CCc3sccc3C2)cc1
131	CAS:124937-51-5	Tolterodine	Cc1ccc(c(c1)[C@@H](c1ccccc1)CCN(C(C)C)C(C)C)O	Inactive	1.59	4.41	Benzene and substituted derivatives	c1ccc(Cc2ccccc2)cc1
132	CAS:26615-21-4	Zotepine	CN(CCOC1=Cc2ccccc2Sc2c1cc(Cl)cc2)C	Inactive	2.2	3.8	Benzothiepins	C1=Cc2ccccc2Sc2ccccc21
133	CAS:538-75-0	Dicyclohexylcarbodiimide	C1CCC(CC1)N=C=NC1CCCCC1	Inactive	1.66	4.34	Organonitrogen compounds	C(=NC1CCCCC1)=NC1CCCCC1
134	CID:38037	Aroclor 1016	Clc1cccc(c1)c1cc(Cl)cc(c1)Cl	Active	1.84	4.16	Benzene and substituted derivatives	c1ccc(-c2ccccc2)cc1
135	CAS:76578-14-8	Quizalofop-ethyl	CCOC(=O)C(Oc1ccc(cc1)Oc1cnc2c(n1)ccc(c2)Cl)C	Active	2.09	3.91	Benzene and substituted derivatives	c1ccc(Oc2cnc3ccccc3n2)cc1
136	CAS:1689-99-2	Bromoxynil octanoate	CCCCCCCC(=O)Oc1c(Br)cc(cc1Br)C#N	Inactive	1.65	4.35	Phenol esters	c1ccccc1		yes		landscape/yard
137	CAS:55285-14-8	Carbosulfan	CCCCN(SN(C(=O)Oc1cccc2c1OC(C2)(C)C)C)CCCC	Inactive	1.58	4.42	Coumarans	c1ccc2c(c1)CCO2		yes
138	CAS:39515-41-8	Fenpropathrin	N#CC(c1cccc(c1)Oc1ccccc1)OC(=O)C1C(C1(C)C)(C)C	Active	1.83	4.17	Benzene and substituted derivatives	O=C(OCc1cccc(Oc2ccccc2)c1)C1CC1			biocide
139	CAS:2050-47-7	4,4'-Dibromodiphenyl ether	Brc1ccc(cc1)Oc1ccc(cc1)Br	Active	2.41	3.59	Benzene and substituted derivatives	c1ccc(Oc2ccccc2)cc1
140	CAS:119-93-7	3,3'-Dimethylbenzidine	Nc1ccc(cc1C)c1ccc(c(c1)C)N	Inactive	1.76	4.24	Benzene and substituted derivatives	c1ccc(-c2ccccc2)cc1				furniture and furnishings
141	CAS:944-22-9	Fonofos	CCP(=S)(Sc1ccccc1)OCC	Inactive	1.48	4.52	Benzene and substituted derivatives	c1ccccc1			biocide	pesticides
142	CAS:69806-40-2	Haloxyfop-methyl	COC(=O)C(Oc1ccc(cc1)Oc1ncc(cc1Cl)C(F)(F)F)C	Inactive	1.77	4.23	Benzene and substituted derivatives	c1ccc(Oc2ccccn2)cc1
143	CAS:319-86-8	delta-Hexachlorocyclohexane	Cl[C@@H]1[C@H](Cl)[C@H](Cl)[C@H]([C@@H]([C@H]1Cl)Cl)Cl	Inactive	1.01	4.99	Alkyl halides	C1CCCCC1				laboratory supplies
144	CAS:82558-50-7	Isoxaben	CCC(c1noc(c1)NC(=O)c1c(OC)cccc1OC)(CC)C	Active	1.71	4.29	Benzene and substituted derivatives	O=C(Nc1ccno1)c1ccccc1				landscape/yard
145	CAS:42874-03-3	Oxyfluorfen	CCOc1cc(ccc1[N+](=O)[O-])Oc1ccc(cc1Cl)C(F)(F)F	Inactive	1.35	4.65	Benzene and substituted derivatives	c1ccc(Oc2ccccc2)cc1
146	CAS:2310-17-0	Phosalone	CCOP(=S)(SCn1c(=O)oc2c1ccc(c2)Cl)OCC	Active	1.81	4.19	Benzoxazoles	O=c1[nH]c2ccccc2o1			biocide
147	CAS:67747-09-5	Prochloraz	CCCN(C(=O)n1cncc1)CCOc1c(Cl)cc(cc1Cl)Cl	Inactive	2.45	3.55	Phenol ethers	O=C(NCCOc1ccccc1)n1ccnc1	yes	yes	biocide
148	CAS:60207-90-1	Propiconazole	CCCC1COC(O1)(Cn1cncn1)c1ccc(cc1Cl)Cl	Inactive	1.69	4.31	Benzene and substituted derivatives	c1ccc(C2(Cn3cncn3)OCCO2)cc1	yes		biocide	construction and building materials|pesticides
149	CAS:78587-05-0	Hexythiazox	C[C@@H]1N(C(=O)NC2CCCCC2)C(=O)S[C@H]1c1ccc(cc1)Cl	Inactive	1.67	4.33	Benzene and substituted derivatives	O=C(NC1CCCCC1)N1CC(c2ccccc2)SC1=O			biocide
150	CAS:88671-89-0	Myclobutanil	CCCCC(c1ccc(cc1)Cl)(Cn1cncn1)C#N	Active	1.86	4.14	Benzene and substituted derivatives	c1ccc(CCn2cncn2)cc1	yes		biocide
151	CAS:28249-77-6	Thiobencarb	CCN(C(=O)SCc1ccc(cc1)Cl)CC	Active	1.7	4.3	Benzene and substituted derivatives	c1ccccc1
152	CAS:96-91-3	2-Amino-4,6-dinitrophenol	[O-][N+](=O)c1cc(N)c(c(c1)[N+](=O)[O-])O	Inactive	1.8	4.2	Phenols	c1ccccc1
153	CAS:6219-89-2	4-Amino-4'-hydroxy-3-methyldiphenylamine	Oc1ccc(cc1)Nc1ccc(c(c1)C)N	Inactive	1.85	4.15	Benzene and substituted derivatives	c1ccc(Nc2ccccc2)cc1
154	CAS:5464-79-9	2-Amino-4-methoxybenzothiazole	COc1cccc2c1nc(s2)N	Inactive	0.36	5.64	Benzothiazoles	c1ccc2scnc2c1
155	CAS:130-17-6	2-(4-Aminophenyl)-6-methylbenzothiazole sulfonic acid	Nc1ccc(cc1)c1nc2c(s1)c(c(cc2)C)S(=O)(=O)O	Inactive	0.87	5.13	Benzothiazoles	c1ccc(-c2nc3ccccc3s2)cc1
156	CAS:495-48-7	Azoxybenzene	[O-][N+](=Nc1ccccc1)c1ccccc1	Inactive	2.07	3.93	Benzene and substituted derivatives	c1ccc(N=[NH+]c2ccccc2)cc1
157	CAS:102-16-9	Benzyl phenylacetate	O=C(Cc1ccccc1)OCc1ccccc1	Inactive	1.62	4.38	Benzene and substituted derivatives	O=C(Cc1ccccc1)OCc1ccccc1			fragrance
158	CAS:118-58-1	Benzyl salicylate	O=C(c1ccccc1O)OCc1ccccc1	Inactive	1.83	4.17	Benzene and substituted derivatives	O=C(OCc1ccccc1)c1ccccc1	yes	yes	UV stabilizer|biocide|fragrance	cleaning products and household care|personal care|vehicle
159	CAS:538-74-9	Benzyl sulfide	S(Cc1ccccc1)Cc1ccccc1	Inactive	1.58	4.42	Benzene and substituted derivatives	c1ccc(CSCc2ccccc2)cc1
160	CAS:622-20-8	1,2-Bis(phenylthio)ethane	C(Sc1ccccc1)CSc1ccccc1	Inactive	2.35	3.65	Thioethers	c1ccc(SCCSc2ccccc2)cc1
161	CAS:2052-07-5	2-Bromobiphenyl	Brc1ccccc1c1ccccc1	Inactive	2.45	3.55	Benzene and substituted derivatives	c1ccc(-c2ccccc2)cc1
162	CAS:2113-57-7	3-Bromobiphenyl	Brc1cccc(c1)c1ccccc1	Inactive	2.18	3.82	Benzene and substituted derivatives	c1ccc(-c2ccccc2)cc1
163	CAS:92-66-0	4-Bromobiphenyl	Brc1ccc(cc1)c1ccccc1	Inactive	2.29	3.71	Benzene and substituted derivatives	c1ccc(-c2ccccc2)cc1
164	CAS:7756-96-9	Butyl anthranilate	CCCCOC(=O)c1ccccc1N	Inactive	1.92	4.08	Benzene and substituted derivatives	c1ccccc1			fragrance
165	CAS:3101-60-8	tert-Butyl phenyl glycidyl ether	CC(c1ccc(cc1)OCC1OC1)(C)C	Inactive	1.94	4.06	Benzene and substituted derivatives	c1ccc(OCC2CO2)cc1				home maintenance
166	CAS:6358-53-8	C.I. Solvent Red 80	COc1ccc(c(c1)/N=N/c1c(O)ccc2c1cccc2)OC	Active	1.68	4.32	Naphthalenes	c1ccc(N=Nc2cccc3ccccc23)cc1
167	CID:460	Creosote, wood	COc1ccccc1O	Inactive	-2.84	8.84	Phenols	c1ccccc1			fragrance
168	CAS:596-03-2	4',5'-Dibromofluorescein	O=C1OC2(c3c1cccc3)c1ccc(c(c1Oc1c2ccc(c1Br)O)Br)O	Active	1.79	4.21	Benzopyrans	O=C1OC2(c3ccccc3Oc3ccccc32)c2ccccc21				personal care
169	CAS:3322-93-8	1,2-Dibromo-4-(1,2-dibromoethyl)cyclohexane	BrCC(C1CCC(C(C1)Br)Br)Br	Inactive	1.24	4.76	Alkyl halides	C1CCCCC1	yes
170	CAS:101-96-2	N,N'-Bis(1-methylpropyl)-1,4-benzenediamine	CCC(Nc1ccc(cc1)NC(CC)C)C	Active	1.78	4.22	Organonitrogen compounds	c1ccccc1		yes
171	CAS:83-38-5	2,6-Dichlorobenzaldehyde	O=Cc1c(Cl)cccc1Cl	Inactive	1.84	4.16	Benzene and substituted derivatives	c1ccccc1
172	CAS:50-45-3	2,3-Dichlorobenzoic acid	OC(=O)c1cccc(c1Cl)Cl	Inactive	-2.41	8.41	Benzene and substituted derivatives	c1ccccc1
173	CAS:51-36-5	3,5-Dichlorobenzoic acid	OC(=O)c1cc(Cl)cc(c1)Cl	Inactive	-2.94	8.94	Benzene and substituted derivatives	c1ccccc1				landscape/yard
174	CAS:80-07-9	4,4'-Dichlorodiphenyl sulfone	Clc1ccc(cc1)S(=O)(=O)c1ccc(cc1)Cl	Inactive	1.74	4.26	Benzene and substituted derivatives	O=S(=O)(c1ccccc1)c1ccccc1		yes
175	CAS:80-43-3	Dicumyl peroxide	CC(c1ccccc1)(OOC(c1ccccc1)(C)C)C	Inactive	1.63	4.37	Benzene and substituted derivatives	c1ccc(COOCc2ccccc2)cc1		yes		construction and building materials
176	CAS:91-44-1	7-Diethylamino-4-methylcoumarin	CCN(c1ccc2c(c1)oc(=O)cc2C)CC	Inactive	1.89	4.11	Coumarins and derivatives	O=c1ccc2ccccc2o1
177	CAS:93-05-0	N,N-Diethylbenzene-1,4-diamine	CCN(c1ccc(cc1)N)CC	Inactive	1.96	4.04	Organonitrogen compounds	c1ccccc1
178	CAS:11024-24-1	Digitonin	OC[C@H]1O[C@@H](O[C@@H]2C[C@@H]3CC[C@@H]4[C@@H]([C@]3(C[C@H]2O)C)CC[C@]2([C@H]4[C@H](O)[C@H]3[C@@H]2[C@@H]([C@]2(O3)CC[C@H](CO2)C)C)C)[C@@H]([C@H]([C@H]1O[C@@H]1O[C@H](CO)[C@H]([C@@H]([C@H]1O[C@@H]1O[C@H](CO)[C@H]([C@@H]([C@H]1O)O[C@@H]1O[C@H](CO)[C@H]([C	Active	0.68	5.32	Steroids and steroid derivatives	C1CCC(OC2CCOC(OC3C(OC4CCCCO4)CCOC3OC3CCC(OC4CCC5C(CCC6C5CCC5C7CC8(CCCCO8)OC7CC56)C4)OC3)C2)OC1
179	CID:8981	1,2-Dihydro-2,2,4-trimethylquinoline, polymer	CC1=CC(C)(C)Nc2c1cccc2	Inactive	-3.14	9.14	Quinolines and derivatives	C1=Cc2ccccc2NC1		yes
180	CAS:2107-76-8	5,7-Dihydroxy-4-methylcoumarin	Oc1cc(O)c2c(c1)oc(=O)cc2C	Inactive	1.78	4.22	Coumarins and derivatives	O=c1ccc2ccccc2o1
181	CAS:119-90-4	3,3'-Dimethoxybenzidine	COc1cc(ccc1N)c1ccc(c(c1)OC)N	Active	1.55	4.45	Benzene and substituted derivatives	c1ccc(-c2ccccc2)cc1				furniture and furnishings
182	CAS:138-89-6	N,N-Dimethyl-4-nitrosoaniline	O=Nc1ccc(cc1)N(C)C	Inactive	1.69	4.31	Organonitrogen compounds	c1ccccc1
183	CAS:483-84-1	8-Hydroxy-5,7-dinitro-2-naphthalenesulfonic acid	[O-][N+](=O)c1cc([N+](=O)[O-])c2c(c1O)cc(cc2)S(=O)(=O)O	Inactive	1.76	4.24	Naphthalenes	c1ccc2ccccc2c1
184	CAS:15791-78-3	C.I. Disperse Blue 27	OCCc1ccc(cc1)Nc1ccc(c2c1C(=O)c1c(C2=O)c(O)ccc1[N+](=O)[O-])O	Inactive	1.7	4.3	Anthracenes	O=C1c2ccccc2C(=O)c2c(Nc3ccccc3)cccc21
185	CAS:6197-30-4	2-Ethylhexyl-2-cyano-3,3-diphenylacrylate	CCCCC(COC(=O)C(=C(c1ccccc1)c1ccccc1)C#N)CC	Inactive	1.13	4.87	Benzene and substituted derivatives	C=C(c1ccccc1)c1ccccc1			UV stabilizer|fragrance	home maintenance|personal care|pesticides
186	CAS:92-59-1	N-Ethyl-N-phenyl benzylamine	CCN(c1ccccc1)Cc1ccccc1	Inactive	2.45	3.55	Benzene and substituted derivatives	c1ccc(CNc2ccccc2)cc1
187	CAS:6789-88-4	Hexyl benzoate	CCCCCCOC(=O)c1ccccc1	Inactive	1.78	4.22	Benzene and substituted derivatives	c1ccccc1			fragrance
188	CAS:7779-65-9	3-Methylbutyl cinnamate	CC(CCOC(=O)C=Cc1ccccc1)C	Inactive	1.86	4.14	Cinnamic acids and derivatives	c1ccccc1			fragrance
189	CAS:97-32-5	4-Methoxy-3-nitro-N-phenylbenzamide	COc1ccc(cc1[N+](=O)[O-])C(=O)Nc1ccccc1	Inactive	1.77	4.23	Benzene and substituted derivatives	O=C(Nc1ccccc1)c1ccccc1
190	CAS:24140-30-5	(+)-2-Methylbutyl-4-methoxybenzyladine-4'-aminocyannate	CC[C@@H](COC(=O)/C=C/c1ccc(cc1)/N=C/c1ccc(cc1)OC)C	Inactive	1.79	4.21	Cinnamic acids and derivatives	C(=Nc1ccccc1)c1ccccc1
191	CAS:2531-84-2	2-Methylphenanthrene	Cc1ccc2c(c1)ccc1c2cccc1	Inactive	1.67	4.33	Phenanthrenes and derivatives	c1ccc2c(c1)ccc1ccccc12
192	CAS:2381-21-7	1-Methylpyrene	Cc1ccc2c3c1ccc1c3c(cc2)ccc1	Inactive	-0.07	6.07	Pyrenes	c1cc2ccc3cccc4ccc(c1)c2c34
193	CAS:83-66-9	Musk ambrette	COc1c([N+](=O)[O-])c(C)c(cc1C(C)(C)C)[N+](=O)[O-]	Active	1.43	4.57	Benzene and substituted derivatives	c1ccccc1
194	CAS:86-00-0	2-Nitro-1,1'-biphenyl	[O-][N+](=O)c1ccccc1c1ccccc1	Inactive	1.83	4.17	Benzene and substituted derivatives	c1ccc(-c2ccccc2)cc1
195	CAS:119-75-5	2-Nitrodiphenylamine	[O-][N+](=O)c1ccccc1Nc1ccccc1	Inactive	1.8	4.2	Benzene and substituted derivatives	c1ccc(Nc2ccccc2)cc1
196	CAS:102-96-5	beta-Nitrostyrene	[O-][N+](=O)C=Cc1ccccc1	Active	1.45	4.55	Benzene and substituted derivatives	c1ccccc1
197	CAS:26530-20-1	Octhilinone	CCCCCCCCn1sccc1=O	Active	1.68	4.32	Azoles	O=c1ccs[nH]1			biocide|preservative	cleaning products and household care|home maintenance
198	CAS:13014-18-1	2,4-Dichloro-1-(trichloromethyl)benzene	Clc1ccc(c(c1)Cl)C(Cl)(Cl)Cl	Active	1.76	4.24	Benzene and substituted derivatives	c1ccccc1
199	CAS:13014-24-9	1,2-Dichloro-4-(trichloromethyl)benzene	Clc1ccc(cc1Cl)C(Cl)(Cl)Cl	Inactive	1.47	4.53	Benzene and substituted derivatives	c1ccccc1
200	CAS:133-18-6	Phenethyl anthranilate	O=C(c1ccccc1N)OCCc1ccccc1	Inactive	1.9	4.1	Benzene and substituted derivatives	O=C(OCCc1ccccc1)c1ccccc1			fragrance
201	CAS:645-49-8	cis-Stilbene	c1ccc(cc1)/C=C\c1ccccc1	Inactive	2	4	Stilbenes	C(=Cc1ccccc1)c1ccccc1
202	CAS:4938-72-1	Isobutyl (2,4,5-trichlorophenoxy)acetate	CC(COC(=O)COc1cc(Cl)c(cc1Cl)Cl)C	Inactive	1.78	4.22	Benzene and substituted derivatives	c1ccccc1
203	CID:16129778	Tannic acid	O=C(c1cc(O)c(c(c1)OC(=O)c1cc(O)c(c(c1)O)O)O)O[C@@H]1[C@@H](COC(=O)c2cc(O)c(c(c2)OC(=O)c2cc(O)c(c(c2)O)O)O)O[C@H]([C@@H]([C@H]1OC(=O)c1cc(O)c(c(c1)OC(=O)c1cc(O)c(c(c1)O)O)O)OC(=O)c1cc(O)c(c(c1)OC(=O)c1cc(O)c(c(c1)O)O)O)OC(=O)c1cc(O)c(c(c1)OC(=O)c1cc(O)c(c(	Inactive	0.94	5.06	Tannins	O=C(OCC1OC(OC(=O)c2cccc(OC(=O)c3ccccc3)c2)C(OC(=O)c2cccc(OC(=O)c3ccccc3)c2)C(OC(=O)c2cccc(OC(=O)c3ccccc3)c2)C1OC(=O)c1cccc(OC(=O)c2ccccc2)c1)c1cccc(OC(=O)c2ccccc2)c1		yes	dehydrating agent
204	CAS:632-79-1	4,5,6,7-Tetrabromo-1,3-Isobenzofurandione	O=C1OC(=O)c2c1c(Br)c(c(c2Br)Br)Br	Inactive	1.99	4.01	Benzofurans	O=C1OC(=O)c2ccccc21		yes
205	CAS:117-18-0	2,3,5,6-Tetrachloronitrobenzene	Clc1cc(Cl)c(c(c1Cl)[N+](=O)[O-])Cl	Inactive	2.09	3.91	Benzene and substituted derivatives	c1ccccc1
206	CAS:54827-17-7	3,3',5,5'-Tetramethylbenzidine	Cc1cc(cc(c1N)C)c1cc(C)c(c(c1)C)N	Inactive	1.62	4.38	Benzene and substituted derivatives	c1ccc(-c2ccccc2)cc1
207	CAS:100-22-1	N,N,N',N'-Tetramethyl-p-phenylenediamine	CN(c1ccc(cc1)N(C)C)C	Active	1.78	4.22	Organonitrogen compounds	c1ccccc1
208	CAS:17700-09-3	2,3,4-Trichloronitrobenzene	[O-][N+](=O)c1ccc(c(c1Cl)Cl)Cl	Inactive	1.94	4.06	Benzene and substituted derivatives	c1ccccc1		yes
209	CAS:18708-70-8	2,4,6-Trichloronitrobenzene	Clc1cc(Cl)cc(c1[N+](=O)[O-])Cl	Inactive	1.66	4.34	Benzene and substituted derivatives	c1ccccc1
210	CAS:101-20-2	Triclocarban	O=C(Nc1ccc(c(c1)Cl)Cl)Nc1ccc(cc1)Cl	Active	1.49	4.51	Benzene and substituted derivatives	O=C(Nc1ccccc1)Nc1ccccc1	yes	yes	biocide|deodorizer|preservative	personal care
211	CID:33133	Trixylyl phosphate	Cc1cc(cc(c1)C)OP(=O)(Oc1cc(C)cc(c1)C)Oc1cc(C)cc(c1)C	Inactive	1.82	4.18	Organic phosphoric acids and derivatives	O=P(Oc1ccccc1)(Oc1ccccc1)Oc1ccccc1		yes		vehicle
212	CAS:68-36-0	1,4-Bis(trichloromethyl)benzene	ClC(c1ccc(cc1)C(Cl)(Cl)Cl)(Cl)Cl	Active	1.86	4.14	Benzene and substituted derivatives	c1ccccc1
213	CAS:87-02-5	7-Amino-4-hydroxynaphthalene-2-sulfonic acid	Nc1ccc2c(c1)cc(cc2O)S(=O)(=O)O	Inactive	1.31	4.69	Naphthalenes	c1ccc2ccccc2c1
214	CAS:88-60-8	2-Tert-Butyl-5-methylphenol	Cc1ccc(c(c1)O)C(C)(C)C	Inactive	1.75	4.25	Benzene and substituted derivatives	c1ccccc1		yes	fragrance
215	CAS:90-51-7	6-Amino-4-hydroxynaphthalene-2-sulfonic acid	Nc1ccc2c(c1)c(O)cc(c2)S(=O)(=O)O	Active	1.55	4.45	Naphthalenes	c1ccc2ccccc2c1
216	CAS:95-32-9	2-(Morpholin-4-yldithio)-1,3-benzothiazole	O1CCN(CC1)SSc1nc2c(s1)cccc2	Active	2.01	3.99	Benzothiazoles	c1ccc2sc(SSN3CCOCC3)nc2c1		yes
217	CAS:104-66-5	1,2-Diphenoxyethane	C(Oc1ccccc1)COc1ccccc1	Inactive	1.86	4.14	Phenol ethers	c1ccc(OCCOc2ccccc2)cc1		yes
218	CAS:120-55-8	Diethylene glycol dibenzoate	O=C(c1ccccc1)OCCOCCOC(=O)c1ccccc1	Inactive	1.53	4.47	Benzene and substituted derivatives	O=C(OCCOCCOC(=O)c1ccccc1)c1ccccc1		yes	binder|softener and conditioner	furniture and furnishings|home maintenance
219	CAS:329-01-1	3-(Trifluoromethyl)phenyl isocyanate	O=C=Nc1cccc(c1)C(F)(F)F	Inactive	1.96	4.04	Benzene and substituted derivatives	c1ccccc1		yes	binder
220	CAS:1724-39-6	Cyclododecanol	OC1CCCCCCCCCCC1	Inactive	1.84	4.16	Organooxygen compounds	C1CCCCCCCCCCC1		yes
221	CAS:3194-55-6	1,2,5,6,9,10-Hexabromocyclododecane	BrC1CCC(Br)C(Br)CCC(C(CCC1Br)Br)Br	Active	1.89	4.11	Organobromides	C1CCCCCCCCCCC1	yes	yes		manufactured formulations
222	CAS:3586-14-9	1-Methyl-3-phenoxybenzene	Cc1cccc(c1)Oc1ccccc1	Inactive	1.92	4.08	Benzene and substituted derivatives	c1ccc(Oc2ccccc2)cc1		yes
223	CAS:17796-82-6	N-(Cyclohexylthio)phthalimide	O=C1N(SC2CCCCC2)C(=O)c2c1cccc2	Active	1.88	4.12	Isoindoles and derivatives	O=C1c2ccccc2C(=O)N1SC1CCCCC1		yes
224	CID:16212880	Diisodecylphenyl phosphite	CC(CCCCCCCOP(Oc1ccccc1)OCCCCCCCC(C)C)C	Inactive	1.84	4.16	Benzene and substituted derivatives	c1ccccc1		yes
225	CID:25457	Dodecylbenzenesulfonic acid	CCCCCCCCCCCCc1ccccc1S(=O)(=O)O	Inactive	2.36	3.64	Benzene and substituted derivatives	c1ccccc1		yes	defoamer|solvent|surfactant	cleaning products and household care|home maintenance|personal care|vehicle
226	CAS:52829-07-9	Bis(2,2,6,6-tetramethyl-4-piperidyl) sebacate	O=C(OC1CC(C)(C)NC(C1)(C)C)CCCCCCCCC(=O)OC1CC(C)(C)NC(C1)(C)C	Inactive	1.02	4.98	Fatty Acyls	O=C(CCCCCCCCC(=O)OC1CCNCC1)OC1CCNCC1		yes	fragrance	pet care
227	CAS:56038-89-2	N-(1-Ethylpropyl)-3,4-xylidine	CCC(Nc1ccc(c(c1)C)C)CC	Inactive	1.56	4.44	Benzene and substituted derivatives	c1ccccc1
228	CAS:66346-01-8	1-(4-Chlorophenyl)-4,4-dimethyl-pentan-3-one	O=C(C(C)(C)C)CCc1ccc(cc1)Cl	Inactive	1.88	4.12	Benzene and substituted derivatives	c1ccccc1		yes
229	CAS:92-06-8	1,1':3',1''-Terphenyl	c1cc(cc(c1)c1ccccc1)c1ccccc1	Inactive	1.9	4.1	Benzene and substituted derivatives	c1ccc(-c2cccc(-c3ccccc3)c2)cc1
230	CAS:626-56-2	3-Methylpiperidine	CC1CCCNC1	Inactive	1.65	4.35	Piperidines	C1CCNCC1
231	CAS:1742-14-9	1,1-Bis(3,4-dimethylphenyl)ethane	CC(c1ccc(c(c1)C)C)c1ccc(c(c1)C)C	Inactive	1.61	4.39	Prenol lipids	c1ccc(Cc2ccccc2)cc1		yes
232	CAS:2772-45-4	2,4-Bis(1-methyl-1-phenylethyl)phenol	Oc1ccc(cc1C(c1ccccc1)(C)C)C(c1ccccc1)(C)C	Inactive	1.69	4.31	Diarylheptanoids	c1ccc(Cc2cccc(Cc3ccccc3)c2)cc1		yes
233	CAS:6632-68-4	6-Amino-1,3-dimethyl-5-nitroso- 2,4(1H,3H)-pyrimidinedione	O=Nc1c(N)n(C)c(=O)n(c1=O)C	Inactive	1.07	4.93	Diazines	O=c1cc[nH]c(=O)[nH]1
234	CAS:21245-02-3	2-Ethylhexyl 4-(dimethylamino)benzoate	CCCCC(COC(=O)c1ccc(cc1)N(C)C)CC	Inactive	1.89	4.11	Benzene and substituted derivatives	c1ccccc1	yes		UV stabilizer	personal care
235	CAS:32388-55-9	Acetyl cedrene	CC(=O)C1=C(C)[C@@H]2C[C@@]3(C1)[C@H](C)CC[C@H]3C2(C)C	Active	1.68	4.32	Prenol lipids	C1=CC2CC3CCCC3(C1)C2		yes	fragrance	cleaning products and household care|personal care|vehicle
236	CAS:69045-83-6	2,3-Dichloro-5-(trichloromethyl)pyridine	Clc1ncc(cc1Cl)C(Cl)(Cl)Cl	Inactive	0.22	5.78	Pyridines and derivatives	c1ccncc1
237	CAS:23593-75-1	Clotrimazole	Clc1ccccc1C(n1cncc1)(c1ccccc1)c1ccccc1	Active	1.91	4.09	Triphenyl compounds	c1ccc(C(c2ccccc2)(c2ccccc2)n2ccnc2)cc1	yes		biocide|cleaning agent, humectant	personal care
238	CAS:49562-28-9	Fenofibrate	CC(OC(=O)C(Oc1ccc(cc1)C(=O)c1ccc(cc1)Cl)(C)C)C	Active	1.46	4.54	Benzene and substituted derivatives	O=C(c1ccccc1)c1ccccc1
239	CAS:65277-42-1	Ketoconazole	Clc1ccc(c(c1)Cl)[C@]1(OC[C@@H](O1)COc1ccc(cc1)N1CCN(CC1)C(=O)C)Cn1cncc1	Active	1.88	4.12	Diazinanes	c1ccc(C2(Cn3ccnc3)OCC(COc3ccc(N4CCNCC4)cc3)O2)cc1	yes
240	CAS:60348-60-9	2,2',4,4',5-Pentabromodiphenyl ether	Brc1ccc(c(c1)Br)Oc1cc(Br)c(cc1Br)Br	Active	2.2	3.8	Benzene and substituted derivatives	c1ccc(Oc2ccccc2)cc1	yes				Evaluation of Exposure to Metals, Flame Retardants, and Nanomaterials at an Electronics Recycling Company|Evaluation of Occupational Exposure to Flame Retardants at Four Gymnastics Studios
241	CAS:5436-43-1	2,2',4,4'-Tetrabromodiphenyl ether	Brc1ccc(c(c1)Br)Oc1ccc(cc1Br)Br	Active	2.04	3.96	Benzene and substituted derivatives	c1ccc(Oc2ccccc2)cc1	yes				Evaluation of Exposure to Metals, Flame Retardants, and Nanomaterials at an Electronics Recycling Company
242	CAS:90-41-5	2-Biphenylamine	Nc1ccccc1c1ccccc1	Inactive	1.75	4.25	Benzene and substituted derivatives	c1ccc(-c2ccccc2)cc1
243	CAS:6051-87-2	5,6-Benzoflavone	O=c1cc(oc2c1c1ccccc1cc2)c1ccccc1	Inactive	1.82	4.18	Flavonoids	O=c1cc(-c2ccccc2)oc2ccc3ccccc3c12	yes
244	CAS:20562-02-1	alpha-Solanine	OC[C@H]1O[C@@H](OC2CC[C@]3(C(=CC[C@@H]4[C@@H]3CC[C@]3([C@H]4C[C@H]4[C@@H]3[C@H](C)[C@@H]3N4C[C@H](CC3)C)C)C2)C)[C@@H]([C@H]([C@H]1O)O[C@@H]1O[C@H](CO)[C@H]([C@@H]([C@H]1O)O)O)O[C@H]1O[C@@H](C)[C@@H]([C@H]([C@H]1O)O)O	Active	1.18	4.82	Steroids and steroid derivatives	C1=C2CC(OC3OCCC(OC4CCCCO4)C3OC3CCCCO3)CCC2C2CCC3C(CC4C3CC3CCCCN34)C2C1
245	CAS:54464-57-2	Isocyclemone E	CC(=O)C1(C)CC2=C(CC1C)CCCC2(C)C	Active	1.52	4.48	Organooxygen compounds	C1CCC2=C(C1)CCCC2		yes	fragrance	cleaning products and household care|personal care|vehicle
246	CAS:35065-27-1	2,2',4,4',5,5'-Hexachlorobiphenyl	Clc1cc(Cl)c(cc1c1cc(Cl)c(cc1Cl)Cl)Cl	Inactive	1.65	4.35	Benzene and substituted derivatives	c1ccc(-c2ccccc2)cc1	yes
247	CAS:78-30-8	Tri-o-cresyl phosphate	Cc1ccccc1OP(=O)(Oc1ccccc1C)Oc1ccccc1C	Inactive	1.52	4.48	Organic phosphoric acids and derivatives	O=P(Oc1ccccc1)(Oc1ccccc1)Oc1ccccc1
248	CAS:64359-81-5	4,5-Dichloro-2-octyl-3(2H)-isothiazolone	CCCCCCCCn1sc(c(c1=O)Cl)Cl	Active	1.69	4.31	Aryl halides	O=c1ccs[nH]1			preservative
249	CAS:33629-47-9	Butralin	CCC(Nc1c(cc(cc1[N+](=O)[O-])C(C)(C)C)[N+](=O)[O-])C	Inactive	0.87	5.13	Benzene and substituted derivatives	c1ccccc1
250	CAS:1134-23-2	Cycloate	CCN(C(=O)SCC)C1CCCCC1	Inactive	2	4	Thiocarbonyl compounds	C1CCCCC1		yes
251	CAS:121552-61-2	Cyprodinil	Cc1nc(Nc2ccccc2)nc(c1)C1CC1	Inactive	1.96	4.04	Benzene and substituted derivatives	c1ccc(Nc2nccc(C3CC3)n2)cc1			biocide
252	CAS:119446-68-3	Difenoconazole	CC1COC(O1)(Cn1cncn1)c1ccc(cc1Cl)Oc1ccc(cc1)Cl	Active	1.71	4.29	Benzene and substituted derivatives	c1ccc(Oc2ccc(C3(Cn4cncn4)OCCO3)cc2)cc1			biocide
253	CAS:55283-68-6	Ethalfluralin	CCN(c1c(cc(cc1[N+](=O)[O-])C(F)(F)F)[N+](=O)[O-])CC(=C)C	Inactive	1.51	4.49	Benzene and substituted derivatives	c1ccccc1
254	CAS:25311-71-1	Isofenphos	CCOP(=S)(Oc1ccccc1C(=O)OC(C)C)NC(C)C	Inactive	1.53	4.47	Benzene and substituted derivatives	c1ccccc1		yes	biocide	pesticides
255	CAS:96182-53-5	Tebupirimfos	CCOP(=S)(Oc1cnc(nc1)C(C)(C)C)OC(C)C	Inactive	1.43	4.57	Organic thiophosphoric acids and derivatives	c1cncnc1			biocide
256	CAS:1192-52-5	4,5-Dichloro-3H-1,2-dithiol-3-one	Clc1ssc(=O)c1Cl	Active	1.52	4.48	Aryl halides	O=c1ccss1
257	CAS:131860-33-8	Azoxystrobin	CO/C=C(\c1ccccc1Oc1ncnc(c1)Oc1ccccc1C#N)/C(=O)OC	Inactive	2.11	3.89	Benzene and substituted derivatives	c1ccc(Oc2cc(Oc3ccccc3)ncn2)cc1			biocide
258	CAS:2634-33-5	1,2-Benzisothiazolin-3-one	O=c1[nH]sc2c1cccc2	Active	1.9	4.1	Benzothiazoles	O=c1[nH]sc2ccccc12		yes	antioxidant|biocide|fragrance|preservative|processing aid not otherwise specified	cleaning products and household care|construction and building materials|electronics/small appliances|home maintenance|personal care|pet care|sports equipment|vehicle
259	CAS:116255-48-2	Bromuconazole	BrC1COC(C1)(Cn1cncn1)c1ccc(cc1Cl)Cl	Inactive	2.16	3.84	Benzene and substituted derivatives	c1ccc(C2(Cn3cncn3)CCCO2)cc1
260	CAS:122453-73-0	Chlorfenapyr	CCOCn1c(c2ccc(cc2)Cl)c(c(c1C(F)(F)F)Br)C#N	Active	1.61	4.39	Pyrroles	c1ccc(-c2ccc[nH]2)cc1			biocide
261	CAS:20018-09-1	Diiodomethyl 4-methylphenyl sulfone	IC(S(=O)(=O)c1ccc(cc1)C)I	Active	1.86	4.14	Benzene and substituted derivatives	c1ccccc1			biocide|preservative
262	CAS:2593-15-9	Etridiazole	CCOc1snc(n1)C(Cl)(Cl)Cl	Inactive	1.91	4.09	Organooxygen compounds	c1ncsn1			biocide	pesticides
263	CAS:111812-58-9	Fenpyroximate (Z,E)	Cc1nn(c(c1C=NOCc1ccc(cc1)C(=O)OC(C)(C)C)Oc1ccccc1)C	Inactive	1.45	4.55	Organooxygen compounds	C(=NOCc1ccccc1)c1cn[nH]c1Oc1ccccc1
264	CAS:79622-59-6	Fluazinam	Clc1cc(cnc1Nc1c(cc(c(c1[N+](=O)[O-])Cl)C(F)(F)F)[N+](=O)[O-])C(F)(F)F	Active	1.77	4.23	Benzene and substituted derivatives	c1ccc(Nc2ccccn2)cc1			biocide
265	CAS:62924-70-3	Flumetralin	CCN(c1c(cc(cc1[N+](=O)[O-])C(F)(F)F)[N+](=O)[O-])Cc1c(F)cccc1Cl	Inactive	1.67	4.33	Benzene and substituted derivatives	c1ccc(CNc2ccccc2)cc1
266	CAS:103361-09-7	Flumioxazin	C#CCN1C(=O)COc2c1cc(c(c2)F)N1C(=O)C2=C(C1=O)CCCC2	Inactive	1.68	4.32	Benzoxazines	O=C1COc2ccc(N3C(=O)C4=C(CCCC4)C3=O)cc2N1
267	CAS:113-48-4	Octylbicycloheptenedicarboximide	CCCCC(CN1C(=O)C2C(C1=O)C1CC2C=C1)CC	Inactive	1.82	4.18	Isoindoles and derivatives	O=C1NC(=O)C2C3C=CC(C3)C12			biocide	pesticides|pet care
268	CAS:96489-71-3	Pyridaben	O=c1c(Cl)c(SCc2ccc(cc2)C(C)(C)C)cnn1C(C)(C)C	Active	1.44	4.56	Benzene and substituted derivatives	O=c1cc(SCc2ccccc2)cn[nH]1			biocide
269	CAS:64700-56-7	Triclopyr butotyl	CCCCOCCOC(=O)COc1nc(Cl)c(cc1Cl)Cl	Inactive	1.54	4.46	Pyridines and derivatives	c1ccncc1				landscape/yard
270	CAS:141517-21-7	Trifloxystrobin	CO/N=C(\c1ccccc1CON=C(c1cccc(c1)C(F)(F)F)C)/C(=O)OC	Inactive	1.51	4.49	Benzene and substituted derivatives	C(=NOCc1ccccc1)c1ccccc1			biocide
271	CAS:156052-68-5	Zoxamide	CCC(C(=O)CCl)(NC(=O)c1cc(Cl)c(c(c1)Cl)C)C	Inactive	1.97	4.03	Benzene and substituted derivatives	c1ccccc1			biocide
272	CAS:51338-27-3	Methyl (RS)-2-[4-(2,4-dichlorophenoxy)phenoxy]propionate	COC(=O)C(Oc1ccc(cc1)Oc1ccc(cc1Cl)Cl)C	Active	1.68	4.32	Benzene and substituted derivatives	c1ccc(Oc2ccccc2)cc1	yes	yes		landscape/yard
273	CAS:80844-07-1	Etofenprox	CCOc1ccc(cc1)C(COCc1cccc(c1)Oc1ccccc1)(C)C	Inactive	1.61	4.39	Benzene and substituted derivatives	c1ccc(CCOCc2cccc(Oc3ccccc3)c2)cc1			biocide	pesticides
274	CAS:175013-18-0	Pyraclostrobin	COC(=O)N(c1ccccc1COc1ccn(n1)c1ccc(cc1)Cl)OC	Inactive	1.78	4.22	Azoles	c1ccc(COc2ccn(-c3ccccc3)n2)cc1			biocide
275	CAS:95737-68-1	Pyriproxyfen	CC(Oc1ccccn1)COc1ccc(cc1)Oc1ccccc1	Inactive	1.57	4.43	Benzene and substituted derivatives	c1ccc(Oc2ccc(OCCOc3ccccn3)cc2)cc1	yes		biocide	pesticides|pet care
276	CAS:21564-17-0	2-(Thiocyanomethylthio)benzothiazole	N#CSCSc1nc2c(s1)cccc2	Active	1.94	4.06	Benzothiazoles	c1ccc2scnc2c1				home maintenance
277	CAS:22248-79-9	Z-Tetrachlorvinphos	Cl/C=C(/c1cc(Cl)c(cc1Cl)Cl)\OP(=O)(OC)OC	Inactive	1.78	4.22	Benzene and substituted derivatives	c1ccccc1			biocide	pesticides|pet care
278	CAS:131983-72-7	Triticonazole	OC1(Cn2ncnc2)C(=Cc2ccc(cc2)Cl)CCC1(C)C	Inactive	2.09	3.91	Benzene and substituted derivatives	C(=C1CCCC1Cn1cncn1)c1ccccc1	yes		biocide
279	CAS:66230-04-4	Esfenvalerate	N#C[C@H](c1cccc(c1)Oc1ccccc1)OC(=O)[C@H](c1ccc(cc1)Cl)C(C)C	Inactive	0.13	5.87	Fatty Acyls	O=C(Cc1ccccc1)OCc1cccc(Oc2ccccc2)c1	yes		biocide	pesticides
280	CAS:173584-44-6	Indoxacarb	COC(=O)N(C(=O)N1CO[C@@]2(C(=N1)c1ccc(cc1C2)Cl)C(=O)OC)c1ccc(cc1)OC(F)(F)F	Inactive	1.32	4.68	Benzene and substituted derivatives	O=C(Nc1ccccc1)N1COC2Cc3ccccc3C2=N1			biocide	pesticides
281	CAS:65558-69-2	1,3-Diiminobenz(f)isoindoline	N=C1NC(=N)c2c1cc1ccccc1c2	Inactive	2.07	3.93	Naphthalenes	N=C1NC(=N)c2cc3ccccc3cc21
282	CAS:5153-67-3	(E)-beta-Nitrostyrene	[O-][N+](=O)/C=C/c1ccccc1	Active	1.34	4.66	Benzene and substituted derivatives	c1ccccc1
283	CAS:15345-89-8	Desmethoxyyangonin	COc1cc(/C=C/c2ccccc2)oc(=O)c1	Inactive	1.74	4.26	Kavalactones	O=c1cccc(C=Cc2ccccc2)o1
284	CAS:32809-16-8	Procymidone	O=C1N(c2cc(Cl)cc(c2)Cl)C(=O)C2(C1(C)C2)C	Inactive	1.92	4.08	Piperidines	O=C1C2CC2C(=O)N1c1ccccc1	yes		biocide
285	CAS:72559-06-9	Rifabutin	CO[C@H]1/C=C/O[C@@]2(C)Oc3c(C2=O)c2C4=NC5(NC4=C(C(=O)c2c(c3C)O)NC(=O)/C(=C\C=C\[C@@H]([C@@H]([C@H]([C@H]([C@H]([C@@H]([C@@H]1C)OC(=O)C)C)O)C)O)C)/C)CCN(CC5)CC(C)C	Inactive	1.91	4.09	Macrolactams	O=C1C=CC=CCCCCCCCCC=COC2Oc3ccc4c(c3C2=O)C2=NC3(CCNCC3)NC2=C(N1)C4=O
286	CID:5590	Triton X-100	OCCOc1ccc(cc1)C(CC(C)(C)C)(C)C	Inactive	1.82	4.18	Benzene and substituted derivatives	c1ccccc1			fragrance|surfactant	arts and crafts/office supplies|cleaning products and household care|home maintenance|laboratory supplies|personal care|pesticides
287	CAS:10540-29-1	Tamoxifen	CC/C(=C(\c1ccccc1)/c1ccc(cc1)OCCN(C)C)/c1ccccc1	Active	1.79	4.21	Stilbenes	C(=C(c1ccccc1)c1ccccc1)c1ccccc1	yes
288	CAS:29091-21-2	Prodiamine	CCCN(c1c(cc(c(c1[N+](=O)[O-])N)C(F)(F)F)[N+](=O)[O-])CCC	Active	2	4	Benzene and substituted derivatives	c1ccccc1				landscape/yard
289	CAS:119168-77-3	Tebufenpyrad	CCc1nn(c(c1Cl)C(=O)NCc1ccc(cc1)C(C)(C)C)C	Active	1.95	4.05	Benzene and substituted derivatives	O=C(NCc1ccccc1)c1ccn[nH]1
290	CAS:470-90-6	Chlorfenvinphos	CCOP(=O)(OC(=CCl)c1ccc(cc1Cl)Cl)OCC	Active	1.89	4.11	Benzene and substituted derivatives	c1ccccc1	yes
291	CAS:2682-20-4	2-Methyl-3(2H)-isothiazolone	Cn1sccc1=O	Inactive	1.14	4.86	Azoles	O=c1ccs[nH]1			antioxidant|fragrance|preservative	arts and crafts/office supplies|cleaning and safety|cleaning products and household care|construction and building materials|home maintenance|laboratory supplies|personal care|vehicle
292	CAS:81406-37-3	Fluroxypyr-meptyl	CCCCCCC(OC(=O)COc1nc(F)c(c(c1Cl)N)Cl)C	Inactive	1.93	4.07	Pyridines and derivatives	c1ccncc1		yes
293	CAS:103055-07-8	Lufenuron	O=C(NC(=O)c1c(F)cccc1F)Nc1cc(Cl)c(cc1Cl)OC(C(C(F)(F)F)F)(F)F	Inactive	1.4	4.6	Benzene and substituted derivatives	O=C(NC(=O)c1ccccc1)Nc1ccccc1			biocide
294	CAS:28434-01-7	Bioresmethrin	CC(=C[C@@H]1[C@H](C1(C)C)C(=O)OCc1coc(c1)Cc1ccccc1)C	Active	1.77	4.23	Prenol lipids	O=C(OCc1coc(Cc2ccccc2)c1)C1CC1
295	CAS:69327-76-0	Buprofezin	CC(N1C(=NC(C)(C)C)SCN(C1=O)c1ccccc1)C	Active	1.76	4.24	Thiadiazinanes	N=C1NC(=O)N(c2ccccc2)CS1			biocide
296	CAS:23184-66-9	Butachlor	CCCCOCN(c1c(CC)cccc1CC)C(=O)CCl	Active	2.18	3.82	Benzene and substituted derivatives	c1ccccc1
297	CAS:87818-31-3	Cinmethylin	CC([C@@]12CC[C@](O2)([C@@H](C1)OCc1ccccc1C)C)C	Active	1.81	4.19	Prenol lipids	c1ccc(COC2CC3CCC2O3)cc1
298	CAS:122008-85-9	Cyhalofop-butyl	CCCCOC(=O)[C@H](Oc1ccc(cc1)Oc1ccc(cc1F)C#N)C	Active	2.02	3.98	Benzene and substituted derivatives	c1ccc(Oc2ccccc2)cc1
299	CAS:153233-91-1	Etoxazole	CCOc1cc(ccc1C1COC(=N1)c1c(F)cccc1F)C(C)(C)C	Active	1.1	4.9	Benzene and substituted derivatives	c1ccc(C2=NC(c3ccccc3)CO2)cc1
300	CAS:131807-57-3	Famoxadone	O=C1OC(C(=O)N1Nc1ccccc1)(C)c1ccc(cc1)Oc1ccccc1	Active	1.4	4.6	Benzene and substituted derivatives	O=C1OC(c2ccc(Oc3ccccc3)cc2)C(=O)N1Nc1ccccc1			biocide
301	CAS:67564-91-4	(2R,6S)-Fenpropimorph	CC(Cc1ccc(cc1)C(C)(C)C)CN1C[C@H](C)O[C@@H](C1)C	Active	1.63	4.37	Benzene and substituted derivatives	c1ccc(CCCN2CCOCC2)cc1		yes
302	CAS:120068-37-3	Fipronil	N#Cc1nn(c(c1S(=O)C(F)(F)F)N)c1c(Cl)cc(cc1Cl)C(F)(F)F	Inactive	1.65	4.35	Azoles	c1ccc(-n2cccn2)cc1	yes		biocide	pesticides|pet care
303	CAS:69806-50-4	Fluazifop-butyl	CCCCOC(=O)C(Oc1ccc(cc1)Oc1ccc(cn1)C(F)(F)F)C	Inactive	1.79	4.21	Benzene and substituted derivatives	c1ccc(Oc2ccccn2)cc1				landscape/yard
304	CAS:239110-15-7	Fluopicolide	Clc1cc(cnc1CNC(=O)c1c(Cl)cccc1Cl)C(F)(F)F	Inactive	1.72	4.28	Benzene and substituted derivatives	O=C(NCc1ccccn1)c1ccccc1			biocide
305	CAS:68157-60-8	Forchlorfenuron	O=C(Nc1ccnc(c1)Cl)Nc1ccccc1	Active	1.99	4.01	Pyridines and derivatives	O=C(Nc1ccccc1)Nc1ccncc1
306	CAS:79983-71-4	Hexaconazole	CCCCC(c1ccc(cc1Cl)Cl)(Cn1cncn1)O	Inactive	2.09	3.91	Benzene and substituted derivatives	c1ccc(CCn2cncn2)cc1			biocide
307	CAS:125225-28-7	Ipconazole	CC(C1CCC(C1(O)Cn1ncnc1)Cc1ccc(cc1)Cl)C	Active	1.87	4.13	Prenol lipids	c1ccc(CC2CCCC2Cn2cncn2)cc1
308	CAS:29450-45-1	MCPA-2-ethylhexyl	CCCCC(COC(=O)COc1ccc(cc1C)Cl)CC	Inactive	1.74	4.26	Benzene and substituted derivatives	c1ccccc1		yes
309	CAS:57018-04-9	Tolclofos-methyl	COP(=S)(Oc1c(Cl)cc(cc1Cl)C)OC	Active	1.67	4.33	Organic thiophosphoric acids and derivatives	c1ccccc1
310	CAS:79241-46-6	Fluazifop-P-butyl	CCCCOC(=O)[C@H](Oc1ccc(cc1)Oc1ccc(cn1)C(F)(F)F)C	Active	2.37	3.63	Benzene and substituted derivatives	c1ccc(Oc2ccccn2)cc1			biocide	landscape/yard
311	CAS:129630-19-9	Pyraflufen-ethyl	CCOC(=O)COc1cc(c(cc1Cl)F)c1nn(c(c1Cl)OC(F)F)C	Inactive	1.78	4.22	Azoles	c1ccc(-c2cc[nH]n2)cc1
312	CAS:124495-18-7	Quinoxyfen	Fc1ccc(cc1)Oc1ccnc2c1c(Cl)cc(c2)Cl	Active	1.66	4.34	Organooxygen compounds	c1ccc(Oc2ccnc3ccccc23)cc1			biocide
313	CAS:112281-77-3	Tetraconazole	Clc1ccc(c(c1)Cl)C(Cn1cncn1)COC(C(F)F)(F)F	Inactive	1.74	4.26	Benzene and substituted derivatives	c1ccc(CCn2cncn2)cc1			biocide
314	CAS:4342-36-3	Tributyltin benzoate	CCCC[Sn](OC(=O)c1ccccc1)(CCCC)CCCC	Active	1.08	4.92	Benzene and substituted derivatives	c1ccccc1
315	CAS:584-79-2	Allethrin	C=CCC1=C(C)C(CC1=O)OC(=O)C1C(C1(C)C)C=C(C)C	Inactive	1.71	4.29	Fatty Acyls	O=C1C=CC(OC(=O)C2CC2)C1			biocide	pesticides|pet care
316	CAS:24157-81-1	2,6-Diisopropylnaphthalene	CC(c1ccc2c(c1)ccc(c2)C(C)C)C	Inactive	1.5	4.5	Naphthalenes	c1ccc2ccccc2c1
317	CAS:68359-37-5	Cyfluthrin	N#CC(c1ccc(c(c1)Oc1ccccc1)F)OC(=O)C1C(C1(C)C)C=C(Cl)Cl	Inactive	1.43	4.57	Fatty Acyls	O=C(OCc1cccc(Oc2ccccc2)c1)C1CC1			biocide	personal care|pesticides
318	CAS:95-38-5	2-(8-Heptadecenyl)-2-imidazoline-1-ethanol	CCCCCCCCC=CCCCCCCCC1=NCCN1CCO	Inactive	1.59	4.41	Imidolactams	C1=NCCN1		yes
319	CAS:3896-11-5	Bumetrizole	Clc1ccc2c(c1)nn(n2)c1cc(C)cc(c1O)C(C)(C)C	Inactive	0.85	5.15	Azoles	c1ccc(-n2nc3ccccc3n2)cc1		yes	UV stabilizer|fragrance	personal care
320	CAS:57-85-2	Testosterone propionate	CCC(=O)O[C@H]1CC[C@@H]2[C@]1(C)CC[C@H]1[C@H]2CCC2=CC(=O)CC[C@]12C	Active	2.05	3.95	Steroids and steroid derivatives	O=C1C=C2CCC3C4CCCC4CCC3C2CC1	yes
321	CID:7700	Nonoxynol	CCCCCCCCCc1ccc(cc1)OCCO	Active	1.5	4.5	Phenol ethers	c1ccccc1			surfactant	cleaning products and household care|home maintenance|personal care|vehicle
322	CAS:91-95-2	3,3'-Diaminobenzidine	Nc1ccc(cc1N)c1ccc(c(c1)N)N	Active	1.82	4.18	Benzene and substituted derivatives	c1ccc(-c2ccccc2)cc1			surfactant
323	CAS:54029-45-7	2-Nitro-4-thiocyanoaniline	N#CSc1ccc(c(c1)[N+](=O)[O-])N	Active	1.8	4.2	Benzene and substituted derivatives	c1ccccc1
324	CAS:2642-71-9	Azinphos-ethyl	CCOP(=S)(SCn1nnc2c(c1=O)cccc2)OCC	Inactive	1.93	4.07	Benzo-1,2,3-triazines	O=c1[nH]nnc2ccccc12
325	CAS:10311-84-9	Dialifor	ClCC(N1C(=O)c2c(C1=O)cccc2)SP(=S)(OCC)OCC	Inactive	2.28	3.72	Isoindoles and derivatives	O=C1NC(=O)c2ccccc21
326	CAS:959-98-8	Endosulfan I	O=S1OC[C@@H]2[C@H](CO1)[C@]1(C([C@]2(Cl)C(=C1Cl)Cl)(Cl)Cl)Cl	Inactive	1.41	4.59	Organic oxoanionic compounds	O=S1OCC2C3C=CC(C3)C2CO1	yes		biocide
327	CAS:1031-07-8	Endosulfan sulfate	ClC1=C(Cl)C2(C(C1(Cl)C1C2COS(=O)(=O)OC1)(Cl)Cl)Cl	Active	1.85	4.15	Organic sulfuric acids and derivatives	O=S1(=O)OCC2C3C=CC(C3)C2CO1
328	CAS:15457-05-3	Fluorodifen	[O-][N+](=O)c1cc(ccc1Oc1ccc(cc1)[N+](=O)[O-])C(F)(F)F	Inactive	2.09	3.91	Benzene and substituted derivatives	c1ccc(Oc2ccccc2)cc1
329	CAS:55814-41-0	Mepronil	CC(Oc1cccc(c1)NC(=O)c1ccccc1C)C	Inactive	1.68	4.32	Benzene and substituted derivatives	O=C(Nc1ccccc1)c1ccccc1
330	CAS:24017-47-8	Triazophos	CCOP(=S)(Oc1ncn(n1)c1ccccc1)OCC	Inactive	1.86	4.14	Azoles	c1ccc(-n2cncn2)cc1	yes
331	CAS:90-98-2	4,4'-Dichlorobenzophenone	O=C(c1ccc(cc1)Cl)c1ccc(cc1)Cl	Inactive	1.88	4.12	Benzene and substituted derivatives	O=C(c1ccccc1)c1ccccc1
332	CAS:3236-71-3	4,4'-(9H-Fluorene-9,9-diyl)diphenol	Oc1ccc(cc1)C1(c2ccc(cc2)O)c2ccccc2-c2c1cccc2	Inactive	-1.39	7.39	Fluorenes	c1ccc(C2(c3ccccc3)c3ccccc3-c3ccccc32)cc1	yes
333	CAS:134-84-9	4-Methylbenzophenone	Cc1ccc(cc1)C(=O)c1ccccc1	Inactive	2	4	Benzene and substituted derivatives	O=C(c1ccccc1)c1ccccc1
334	CAS:87-18-3	4-tert-Butylphenyl salicylate	O=C(c1ccccc1O)Oc1ccc(cc1)C(C)(C)C	Inactive	1.78	4.22	Depsides and depsidones	O=C(Oc1ccccc1)c1ccccc1
335	CAS:65405-77-8	(3Z)-Hex-3-en-1-yl salicylate	CC/C=C\CCOC(=O)c1ccccc1O	Inactive	1.82	4.18	Benzene and substituted derivatives	c1ccccc1			fragrance	cleaning products and household care|personal care
336	CAS:5598-15-2	Chlorpyrifos oxon	CCOP(=O)(Oc1nc(Cl)c(cc1Cl)Cl)OCC	Inactive	2.08	3.92	Pyridines and derivatives	c1ccncc1
337	CAS:10094-34-5	1,1-Dimethyl-2-phenylethyl butanoate	CCCC(=O)OC(Cc1ccccc1)(C)C	Active	1.68	4.32	Benzene and substituted derivatives	c1ccccc1			fragrance	cleaning products and household care|vehicle
338	CAS:88-24-4	2,2'-Methylenebis(ethyl-6-tert-butylphenol)	CCc1cc(Cc2cc(CC)cc(c2O)C(C)(C)C)c(c(c1)C(C)(C)C)O	Inactive	1.68	4.32	Benzene and substituted derivatives	c1ccc(Cc2ccccc2)cc1				pesticides
339	CAS:131-54-4	2,2'-Dihydroxy-4,4'-dimethoxybenzophenone	COc1ccc(c(c1)O)C(=O)c1ccc(cc1O)OC	Inactive	1.36	4.64	Benzene and substituted derivatives	O=C(c1ccccc1)c1ccccc1	yes		UV stabilizer
340	CAS:132-54-7	Phenyl 1-hydroxy-2-naphthoate	O=C(c1ccc2c(c1O)cccc2)Oc1ccccc1	Inactive	1.75	4.25	Naphthalenes	O=C(Oc1ccccc1)c1ccc2ccccc2c1
341	CAS:135-62-6	3-Hydroxy-2-naphthoic o-anisidide	COc1ccccc1NC(=O)c1cc2ccccc2cc1O	Inactive	1.58	4.42	Naphthalenes	O=C(Nc1ccccc1)c1ccc2ccccc2c1
342	CAS:28434-00-6	S-Bioallethrin	C=CCC1=C(C)[C@H](CC1=O)OC(=O)[C@@H]1[C@H](C1(C)C)C=C(C)C	Inactive	2.16	3.84	Fatty Acyls	O=C1C=CC(OC(=O)C2CC2)C1				pesticides
343	CAS:146-48-5	Yohimbine	COC(=O)[C@H]1[C@@H](O)CC[C@@H]2[C@@H]1C[C@@H]1N(C2)CCc2c1[nH]c1c2cccc1	Inactive	1.71	4.29	Yohimbine alkaloids	c1ccc2c3c([nH]c2c1)C1CC2CCCCC2CN1CC3
344	CAS:485-31-4	Binapacryl	CCC(c1cc(cc(c1OC(=O)C=C(C)C)[N+](=O)[O-])[N+](=O)[O-])C	Inactive	1.97	4.03	Phenol esters	c1ccccc1
345	CAS:3347-22-6	Dithianon	N#Cc1sc2=c(sc1C#N)c(=O)c1c(c2=O)cccc1	Active	1.69	4.31	Naphthalenes	O=c1c2sccsc=2c(=O)c2ccccc12
346	CAS:97-17-6	Dichlofenthion	CCOP(=S)(Oc1ccc(cc1Cl)Cl)OCC	Inactive	1.54	4.46	Organic thiophosphoric acids and derivatives	c1ccccc1
347	CAS:18181-70-9	Iodenphos	COP(=S)(Oc1cc(Cl)c(cc1Cl)I)OC	Inactive	1.4	4.6	Organic thiophosphoric acids and derivatives	c1ccccc1
348	CAS:21609-90-5	Leptophos	COP(=S)(c1ccccc1)Oc1cc(Cl)c(cc1Cl)Br	Inactive	1.62	4.38	Benzene and substituted derivatives	S=[PH](Oc1ccccc1)c1ccccc1
349	CAS:2051-62-9	4-Chlorobiphenyl	Clc1ccc(cc1)c1ccccc1	Inactive	1.89	4.11	Benzene and substituted derivatives	c1ccc(-c2ccccc2)cc1
350	CAS:42576-02-3	Bifenox	COC(=O)c1cc(ccc1[N+](=O)[O-])Oc1ccc(cc1Cl)Cl	Inactive	1.64	4.36	Benzene and substituted derivatives	c1ccc(Oc2ccccc2)cc1
351	CID:5284389	Dinocap	CCCCCCC(c1cc(cc(c1OC(=O)/C=C/C)[N+](=O)[O-])[N+](=O)[O-])C	Inactive	1.95	4.05	Phenol esters	c1ccccc1			biocide
352	CAS:83657-24-3	Diniconazole	Clc1ccc(c(c1)Cl)/C=C(\C(C(C)(C)C)O)/n1cncn1	Inactive	1.99	4.01	Cinnamyl alcohols	C(=Cn1cncn1)c1ccccc1
353	CAS:133855-98-8	Epoxiconazole	Fc1ccc(cc1)C1(Cn2cncn2)OC1c1ccccc1Cl	Inactive	1.72	4.28	Stilbenes	c1ccc(C2OC2(Cn2cncn2)c2ccccc2)cc1	yes		biocide
354	CAS:114977-28-5	Docetaxel	CC(=O)O[C@@]12CO[C@@H]1C[C@@H]([C@@]1([C@@H]2[C@H](OC(=O)c2ccccc2)[C@]2(O)C[C@H](OC(=O)[C@@H]([C@H](c3ccccc3)NC(=O)OC(C)(C)C)O)C(=C(C2(C)C)[C@H](C1=O)O)C)C)O	Inactive	-1.09	7.09	Prenol lipids	O=C(CCc1ccccc1)OC1C=C2CC(=O)C3CCC4OCC4C3C(OC(=O)c3ccccc3)C(C2)C1
355	CAS:58-32-2	Dipyridamole	OCCN(c1nc(N2CCCCC2)c2c(n1)c(nc(n2)N(CCO)CCO)N1CCCCC1)CCO	Inactive	1.98	4.02	Organonitrogen compounds	c1nc(N2CCCCC2)c2ncnc(N3CCCCC3)c2n1		yes
356	CAS:130-15-4	1,4-Naphthoquinone	O=C1C=CC(=O)c2c1cccc2	Active	1.2	4.8	Naphthalenes	O=C1C=CC(=O)c2ccccc21
357	CAS:3118-97-6	C.I. Solvent Orange 7	Cc1ccc(c(c1)C)N=Nc1c(O)ccc2c1cccc2	Inactive	2.2	3.8	Naphthalenes	c1ccc(N=Nc2cccc3ccccc23)cc1				personal care
358	CAS:5930-28-9	4-Amino-2,6-dichlorophenol	Nc1cc(Cl)c(c(c1)Cl)O	Inactive	1.74	4.26	Benzene and substituted derivatives	c1ccccc1
359	CAS:2433-14-9	4-Cyclohexylcyclohexanol	OC1CCC(CC1)C1CCCCC1	Inactive	1.89	4.11	Organooxygen compounds	C1CCC(C2CCCCC2)CC1
360	CAS:639-58-7	Triphenyltin chloride	Cl[Sn](c1ccccc1)(c1ccccc1)c1ccccc1	Active	1.07	4.93	Benzene and substituted derivatives	c1ccc([SnH](c2ccccc2)c2ccccc2)cc1	yes
361	CAS:118-60-5	2-Ethylhexyl salicylate	CCCCC(COC(=O)c1ccccc1O)CC	Inactive	1.6	4.4	Benzene and substituted derivatives	c1ccccc1			UV stabilizer|fragrance	personal care|pesticides
362	CAS:71441-28-6	Arotinoid acid	C/C(=C\c1ccc(cc1)C(=O)O)/c1ccc2c(c1)C(C)(C)CCC2(C)C	Active	1.44	4.56	Stilbenes	C(=Cc1ccc2c(c1)CCCC2)c1ccccc1
363	CAS:79558-09-1	4-[3-(4-Acetyl-3-hydroxy-2-propylphenoxy)propoxy]phenoxy-acetic acid	CCCc1c(OCCCOc2ccc(cc2)OCC(=O)O)ccc(c1O)C(=O)C	Inactive	0.3	5.7	Organooxygen compounds	c1ccc(OCCCOc2ccccc2)cc1
364	CAS:4419-39-0	Beclomethasone	OCC(=O)[C@@]1(O)[C@@H](C)C[C@@H]2[C@]1(C)C[C@H](O)[C@]1([C@H]2CCC2=CC(=O)C=C[C@]12C)Cl	Inactive	1.33	4.67	Steroids and steroid derivatives	O=C1C=CC2C(=C1)CCC1C3CCCC3CCC21
365	CAS:102121-60-8	AM580	O=C(c1ccc2c(c1)C(C)(C)CCC2(C)C)Nc1ccc(cc1)C(=O)O	Active	1.78	4.22	Benzene and substituted derivatives	O=C(Nc1ccccc1)c1ccc2c(c1)CCCC2
366	CAS:317318-84-6	{4-[({2-[3-Fluoro-4-(trifluoromethyl)phenyl]-4-methyl-1,3-thiazol-5-yl}methyl)sulfanyl]-2-methylphenoxy}acetic acid	OC(=O)COc1ccc(cc1C)SCc1sc(nc1C)c1ccc(c(c1)F)C(F)(F)F	Inactive	1.81	4.19	Benzene and substituted derivatives	c1ccc(SCc2cnc(-c3ccccc3)s2)cc1
367	CAS:302962-49-8	Dasatinib	OCCN1CCN(CC1)c1cc(nc(n1)C)Nc1ncc(s1)C(=O)Nc1c(C)cccc1Cl	Active	1.94	4.06	Benzene and substituted derivatives	O=C(Nc1ccccc1)c1cnc(Nc2cc(N3CCNCC3)ncn2)s1
368	CAS:555-60-2	Carbonyl cyanide chlorophenylhydrazone	N#CC(=NNc1cccc(c1)Cl)C#N	Inactive	1.66	4.34	Benzene and substituted derivatives	c1ccccc1
369	CAS:82410-32-0	Ganciclovir	OCC(OCn1cnc2c1nc(N)[nH]c2=O)CO	Inactive	-1.93	7.93	Imidazopyrimidines	O=c1[nH]cnc2[nH]cnc12
370	CAS:52-53-9	Verapamil	COc1ccc(cc1OC)CCN(CCCC(c1ccc(c(c1)OC)OC)(C(C)C)C#N)C	Inactive	1.17	4.83	Benzene and substituted derivatives	c1ccc(CCCCNCCc2ccccc2)cc1
371	CAS:705-60-2	(2-Nitro-1-propenyl)benzene	CC(=Cc1ccccc1)[N+](=O)[O-]	Active	1.77	4.23	Benzene and substituted derivatives	c1ccccc1
372	CAS:94-91-7	N,N'-Disalicylidene-1,2-diaminopropane	CC(/N=C/c1ccccc1O)C/N=C/c1ccccc1O	Inactive	1.7	4.3	Phenols	C(=NCCN=Cc1ccccc1)c1ccccc1				vehicle
373	CAS:67375-30-8	alpha-Cypermethrin	N#C[C@@H](c1cccc(c1)Oc1ccccc1)OC(=O)[C@H]1[C@H](C1(C)C)C=C(Cl)Cl	Inactive	1.68	4.32	Fatty Acyls	O=C(OCc1cccc(Oc2ccccc2)c1)C1CC1	yes
374	CAS:1081-34-1	alpha-Terthiophene	c1csc(c1)c1ccc(s1)c1cccs1	Inactive	1.9	4.1	Bi- and oligothiophenes	c1csc(-c2ccc(-c3cccs3)s2)c1
375	CAS:88-58-4	2,5-Di-tert-butylbenzene-1,4-diol	CC(c1cc(O)c(cc1O)C(C)(C)C)(C)C	Active	1.88	4.12	Benzene and substituted derivatives	c1ccccc1			antioxidant
376	CAS:14233-37-5	1,4-Bis(N-isopropylamino)anthraquinone	CC(Nc1ccc(c2c1C(=O)c1c(C2=O)cccc1)NC(C)C)C	Inactive	1.76	4.24	Anthracenes	O=C1c2ccccc2C(=O)c2ccccc21
377	CAS:128-95-0	1,4-Diaminoanthraquinone	Nc1ccc(c2c1C(=O)c1ccccc1C2=O)N	Active	1.65	4.35	Anthracenes	O=C1c2ccccc2C(=O)c2ccccc21
378	CAS:103112-35-2	Fenchlorazole-ethyl	CCOC(=O)c1nn(c(n1)C(Cl)(Cl)Cl)c1ccc(cc1Cl)Cl	Inactive	1.75	4.25	Azoles	c1ccc(-n2cncn2)cc1
379	CAS:77-53-2	(+)-Cedrol	C[C@@H]1CC[C@@H]2[C@@]31CC[C@@]([C@H](C3)C2(C)C)(C)O	Inactive	1.51	4.49	Prenol lipids	C1CC2CC3CCCC3(C1)C2			fragrance|softener and conditioner	cleaning products and household care
380	CAS:941-69-5	1-Phenyl-1H-pyrrole-2,5-dione	O=C1C=CC(=O)N1c1ccccc1	Active	1.63	4.37	Pyrrolines	O=C1C=CC(=O)N1c1ccccc1		yes
381	CID:3058839	(Dicyclopentadienyloxy)ethyl methacrylate	CC(=C)C(=O)OCCOC1CC2CC1C1C2CC=C1	Inactive	1.72	4.28	Prenol lipids	C1=CC2C3CCC(C3)C2C1
382	CAS:2545-59-7	2,4,5-T-butotyl	CCCCOCCOC(=O)COc1cc(Cl)c(cc1Cl)Cl	Inactive	1.92	4.08	Benzene and substituted derivatives	c1ccccc1				landscape/yard
383	CAS:1928-47-8	2,4,5-T 2-Ethylhexyl	CCCCC(COC(=O)COc1cc(Cl)c(cc1Cl)Cl)CC	Inactive	1.61	4.39	Benzene and substituted derivatives	c1ccccc1
384	CAS:533-23-3	2,4-D-ethyl ester	CCOC(=O)COc1ccc(cc1Cl)Cl	Inactive	1.66	4.34	Benzene and substituted derivatives	c1ccccc1
385	CAS:1928-38-7	2,4-D-methyl	COC(=O)COc1ccc(cc1Cl)Cl	Inactive	1.62	4.38	Benzene and substituted derivatives	c1ccccc1				landscape/yard
386	CAS:1594-56-5	2,4-Dinitrophenyl thiocyanate	N#CSc1ccc(cc1[N+](=O)[O-])[N+](=O)[O-]	Active	1.91	4.09	Benzene and substituted derivatives	c1ccccc1
387	CAS:3737-41-5	3,3,4,4-Tetrachlorotetrahydrothiophene 1,1-dioxide	ClC1(Cl)CS(=O)(=O)CC1(Cl)Cl	Active	1.64	4.36	Thiolanes	O=S1(=O)CCCC1
388	CAS:13347-42-7	4-Chloro-2-cyclopentylphenol	Oc1ccc(cc1C1CCCC1)Cl	Inactive	2.45	3.55	Phenols	c1ccc(C2CCCC2)cc1
389	CAS:21145-77-7	6-Acetyl-1,1,2,4,4,7-hexamethyltetralin	CC1CC(C)(C)c2c(C1(C)C)cc(c(c2)C(=O)C)C	Inactive	1.36	4.64	Tetralins	c1ccc2c(c1)CCCC2		yes	fragrance	cleaning products and household care|personal care|vehicle
390	CAS:89-68-9	6-Chlorothymol	CC(c1cc(Cl)c(cc1O)C)C	Inactive	1.25	4.75	Prenol lipids	c1ccccc1			biocide|crystal growth modifier|deodorizer|flavoring and nutrient|no specific technical function
391	CAS:137-66-6	Ascorbyl palmitate	CCCCCCCCCCCCCCCC(=O)OC[C@@H]([C@H]1OC(=O)C(=C1O)O)O	Inactive	1.14	4.86	Fatty Acyls	O=C1C=CCO1			antioxidant|fragrance	personal care
392	CAS:135-57-9	2,2'-Dibenzoylaminodiphenyl disulfide	O=C(c1ccccc1)Nc1ccccc1SSc1ccccc1NC(=O)c1ccccc1	Inactive	0.04	5.96	Benzene and substituted derivatives	O=C(Nc1ccccc1SSc1ccccc1NC(=O)c1ccccc1)c1ccccc1		yes
393	CAS:5444-75-7	2-Ethylhexyl benzoate	CCCCC(COC(=O)c1ccccc1)CC	Inactive	1.63	4.37	Benzene and substituted derivatives	c1ccccc1		yes	softener and conditioner|solvent	home maintenance|personal care
394	CAS:103-41-3	Benzyl cinnamate	O=C(C=Cc1ccccc1)OCc1ccccc1	Inactive	1.62	4.38	Cinnamic acids and derivatives	O=C(C=Cc1ccccc1)OCc1ccccc1			fragrance	cleaning products and household care|personal care
395	CAS:103-29-7	Bibenzyl	c1ccc(cc1)CCc1ccccc1	Inactive	1.39	4.61	Stilbenes	c1ccc(CCc2ccccc2)cc1		yes			Emissions Generated from the Laser Marking of Different Products
396	CAS:115-39-9	Bromophenol blue	Oc1c(Br)cc(cc1Br)C1(OS(=O)(=O)c2c1cccc2)c1cc(Br)c(c(c1)Br)O	Active	1.41	4.59	Benzofurans	O=S1(=O)OC(c2ccccc2)(c2ccccc2)c2ccccc21			antioxidant|biocide	laboratory supplies
397	CAS:2104-96-3	Bromofos	COP(=S)(Oc1cc(Cl)c(cc1Cl)Br)OC	Inactive	1.64	4.36	Organic thiophosphoric acids and derivatives	c1ccccc1
398	CAS:4824-78-6	Bromophos-ethyl	CCOP(=S)(Oc1cc(Cl)c(cc1Cl)Br)OCC	Active	1.88	4.12	Organic thiophosphoric acids and derivatives	c1ccccc1
399	CAS:2481-94-9	C.I. Solvent Yellow 56	CCN(c1ccc(cc1)/N=N/c1ccccc1)CC	Active	1.86	4.14	Azobenzenes	c1ccc(N=Nc2ccccc2)cc1			dye
400	CAS:99607-70-2	Cloquintocet-mexyl	CCCCCC(OC(=O)COc1ccc(c2c1nccc2)Cl)C	Inactive	1.6	4.4	Benzene and substituted derivatives	c1ccc2ncccc2c1
401	CAS:1085-98-9	Dichlofluanid	CN(S(=O)(=O)N(c1ccccc1)SC(Cl)(Cl)F)C	Active	1.53	4.47	Benzene and substituted derivatives	c1ccccc1		yes	biocide
402	CAS:22936-75-0	Dimethametryn	CCNc1nc(NC(C(C)C)C)nc(n1)SC	Inactive	1.87	4.13	Triazines	c1ncncn1
403	CAS:63837-33-2	Diofenolan	CCC1OCC(O1)COc1ccc(cc1)Oc1ccccc1	Active	1.79	4.21	Benzene and substituted derivatives	c1ccc(Oc2ccc(OCC3COCO3)cc2)cc1
404	CAS:52756-22-6	Flamprop-isopropyl	CC(OC(=O)C(N(C(=O)c1ccccc1)c1ccc(c(c1)Cl)F)C)C	Inactive	2.31	3.69	Benzene and substituted derivatives	O=C(Nc1ccccc1)c1ccccc1
405	CAS:101463-69-8	Flufenoxuron	O=C(NC(=O)c1c(F)cccc1F)Nc1ccc(cc1F)Oc1ccc(cc1Cl)C(F)(F)F	Active	1.75	4.25	Benzene and substituted derivatives	O=C(NC(=O)c1ccccc1)Nc1ccc(Oc2ccccc2)cc1
406	CAS:18854-01-8	Isoxathion	CCOP(=S)(Oc1noc(c1)c1ccccc1)OCC	Active	1.61	4.39	Organic thiophosphoric acids and derivatives	c1ccc(-c2ccno2)cc1
407	CAS:58769-20-3	Kadethrin	O=C([C@H]1[C@H](C1(C)C)/C=C/1\CCSC1=O)OCc1coc(c1)Cc1ccccc1	Inactive	1.57	4.43	Benzene and substituted derivatives	O=C1SCCC1=CC1CC1C(=O)OCc1coc(Cc2ccccc2)c1
408	CAS:59227-89-3	Laurocapram	CCCCCCCCCCCCN1CCCCCC1=O	Inactive	1.81	4.19	Lactams	O=C1CCCCCN1
409	CAS:100-56-1	Phenylmercuric chloride	Cl[Hg]c1ccccc1	Active	1.86	4.14	Benzene and substituted derivatives	c1ccccc1			preservative
410	CAS:4726-14-1	Nitralin	CCCN(c1c(cc(cc1[N+](=O)[O-])S(=O)(=O)C)[N+](=O)[O-])CCC	Inactive	2	4	Benzene and substituted derivatives	c1ccccc1
411	CAS:2687-96-9	1-Dodecyl-2-pyrrolidinone	CCCCCCCCCCCCN1CCCC1=O	Active	1.85	4.15	Pyrrolidines	O=C1CCCN1			softener and conditioner|surfactant	personal care
412	CAS:578-54-1	2-Ethylaniline	CCc1ccccc1N	Inactive	-3.9	9.9	Benzene and substituted derivatives	c1ccccc1		yes
413	CAS:80443-63-6	2-(2-(4-Chlorophenyl)ethyl)-2-(1,1-dimethylethyl)oxirane	CC(C1(CCc2ccc(cc2)Cl)OC1)(C)C	Inactive	1.62	4.38	Benzene and substituted derivatives	c1ccc(CCC2CO2)cc1		yes
414	CAS:28768-32-3	4,4'-Methylenebis(N,N-diglycidylaniline)	O1CC1CN(c1ccc(cc1)Cc1ccc(cc1)N(CC1OC1)CC1OC1)CC1OC1	Inactive	1.9	4.1	Benzene and substituted derivatives	c1cc(N(CC2CO2)CC2CO2)ccc1Cc1ccc(N(CC2CO2)CC2CO2)cc1		yes
415	CAS:637-03-6	Phenylarsine oxide	O=[As]c1ccccc1	Active	1.09	4.91	Benzene and substituted derivatives	c1ccccc1				laboratory supplies
416	CAS:66246-88-6	Penconazole	CCCC(c1ccc(cc1Cl)Cl)Cn1cncn1	Inactive	2.05	3.95	Benzene and substituted derivatives	c1ccc(CCn2cncn2)cc1	yes		biocide
417	CAS:1825-19-0	Pentachlorothioanisole	CSc1c(Cl)c(Cl)c(c(c1Cl)Cl)Cl	Active	1.67	4.33	Thioethers	c1ccccc1
418	CAS:2597-03-7	Phenthoate	CCOC(=O)C(c1ccccc1)SP(=S)(OC)OC	Inactive	1.01	4.99	Benzene and substituted derivatives	c1ccccc1			biocide
419	CAS:23505-41-1	Pirimiphos-ethyl	CCOP(=S)(Oc1cc(C)nc(n1)N(CC)CC)OCC	Active	1.61	4.39	Organic thiophosphoric acids and derivatives	c1cncnc1
420	CAS:34643-46-4	Prothiofos	CCCSP(=S)(Oc1ccc(cc1Cl)Cl)OCC	Inactive	2.06	3.94	Benzene and substituted derivatives	c1ccccc1
421	CAS:13457-18-6	Pyrazophos	CCOC(=O)c1cn2nc(cc2nc1C)OP(=S)(OCC)OCC	Active	2.01	3.99	Organic thiophosphoric acids and derivatives	c1cnc2ccnn2c1
422	CAS:2110-18-1	2-(3-Phenylpropyl)pyridine	c1ccc(cc1)CCCc1ccccn1	Inactive	1.94	4.06	Pyridines and derivatives	c1ccc(CCCc2ccccn2)cc1			fragrance
423	CAS:53558-25-1	Pyrinuron	O=C(Nc1ccc(cc1)[N+](=O)[O-])NCc1cccnc1	Inactive	2.02	3.98	Benzene and substituted derivatives	O=C(NCc1cccnc1)Nc1ccccc1
424	CAS:1918-18-9	Swep	COC(=O)Nc1ccc(c(c1)Cl)Cl	Inactive	1.74	4.26	Benzene and substituted derivatives	c1ccccc1
425	CAS:731-27-1	Tolylfluanid	Cc1ccc(cc1)N(S(=O)(=O)N(C)C)SC(Cl)(Cl)F	Active	1.75	4.25	Benzene and substituted derivatives	c1ccccc1	yes		biocide
426	CAS:379-52-2	Triphenyltin fluoride	F[Sn](c1ccccc1)(c1ccccc1)c1ccccc1	Active	1.35	4.65	Benzene and substituted derivatives	c1ccc([SnH](c2ccccc2)c2ccccc2)cc1
427	CAS:162408-66-4	GR 103691	COc1ccccc1N1CCN(CC1)CCCCNC(=O)c1ccc(cc1)c1ccc(cc1)C(=O)C	Inactive	0.79	5.21	Organooxygen compounds	O=C(NCCCCN1CCN(c2ccccc2)CC1)c1ccc(-c2ccccc2)cc1
428	CAS:40796-97-2	MDL 72222	CN1[C@@H]2CC[C@H]1C[C@H](C2)OC(=O)c1cc(Cl)cc(c1)Cl	Inactive	1.37	4.63	Benzene and substituted derivatives	O=C(OC1CC2CCC(C1)N2)c1ccccc1
429	CAS:630-60-4	Ouabain	OC[C@@]12[C@H](O)C[C@@H](C[C@@]2(O)CC[C@@H]2[C@@H]1[C@H](O)C[C@]1([C@]2(O)CC[C@@H]1C1=CC(=O)OC1)C)O[C@@H]1O[C@@H](C)[C@@H]([C@H]([C@H]1O)O)O	Active	0.43	5.57	Steroids and steroid derivatives	O=C1C=C(C2CCC3C2CCC2C4CCC(OC5CCCCO5)CC4CCC23)CO1
430	CAS:112108-01-7	Ecopipam	CN1CCc2c([C@@H]3[C@@H]1CCc1c3cccc1)cc(c(c2)Cl)O	Inactive	1.5	4.5	Benzazepines	c1ccc2c(c1)CCNC1CCc3ccccc3C21
431	CAS:630-56-8	Hydroxyprogesterone caproate	CCCCCC(=O)O[C@@]1(CC[C@@H]2[C@]1(C)CC[C@H]1[C@H]2CCC2=CC(=O)CC[C@]12C)C(=O)C	Active	2.07	3.93	Steroids and steroid derivatives	O=C1C=C2CCC3C4CCCC4CCC3C2CC1
432	CAS:20229-30-5	Metitepine	CSc1ccc2c(c1)C(Cc1c(S2)cccc1)N1CCN(CC1)C	Inactive	1.43	4.57	Benzothiepins	c1ccc2c(c1)CC(N1CCNCC1)c1ccccc1S2
433	CAS:54739-18-3	Fluvoxamine	NCCO/N=C(/c1ccc(cc1)C(F)(F)F)\CCCCOC	Inactive	2.2	3.8	Benzene and substituted derivatives	c1ccccc1	yes
434	CAS:100643-71-8	Desloratadine	Clc1ccc2c(c1)CCc1c(C2=C2CCNCC2)nccc1	Active	1.51	4.49	Benzocycloheptapyridines	c1ccc2c(c1)CCc1cccnc1C2=C1CCNCC1
435	CAS:106-02-5	Pentadecan-15-olide	O=C1CCCCCCCCCCCCCCO1	Inactive	1.82	4.18	Macrolides and analogues	O=C1CCCCCCCCCCCCCCO1			fragrance	cleaning products and household care|personal care|vehicle
436	CAS:13676-54-5	Bismaleimide	O=C1C=CC(=O)N1c1ccc(cc1)Cc1ccc(cc1)N1C(=O)C=CC1=O	Active	1.61	4.39	Benzene and substituted derivatives	O=C1C=CC(=O)N1c1ccc(Cc2ccc(N3C(=O)C=CC3=O)cc2)cc1
437	CAS:139-66-2	Diphenyl sulfide	c1ccc(cc1)Sc1ccccc1	Inactive	2.28	3.72	Thioethers	c1ccc(Sc2ccccc2)cc1
438	CAS:3006-93-7	N,N'-1,3-Phenylenedimaleimide	O=C1C=CC(=O)N1c1cccc(c1)N1C(=O)C=CC1=O	Active	1.36	4.64	Pyrrolines	O=C1C=CC(=O)N1c1cccc(N2C(=O)C=CC2=O)c1				construction and building materials
439	CAS:4422-95-1	1,3,5-Benzenetricarbonyl trichloride	ClC(=O)c1cc(cc(c1)C(=O)Cl)C(=O)Cl	Active	1.83	4.17	Benzene and substituted derivatives	c1ccccc1
440	CAS:451-40-1	1,2-Diphenylethanone	O=C(c1ccccc1)Cc1ccccc1	Inactive	1.93	4.07	Stilbenes	O=C(Cc1ccccc1)c1ccccc1
441	CAS:76-60-8	Bromcresol green	Brc1cc(c(c(c1O)Br)C)C1(OS(=O)(=O)c2c1cccc2)c1cc(Br)c(c(c1C)Br)O	Active	0.91	5.09	Benzofurans	O=S1(=O)OC(c2ccccc2)(c2ccccc2)c2ccccc21			dye
442	CAS:102-20-5	2-Phenylethyl phenylacetate	O=C(Cc1ccccc1)OCCc1ccccc1	Inactive	1.29	4.71	Benzene and substituted derivatives	O=C(Cc1ccccc1)OCCc1ccccc1			fragrance	cleaning products and household care
443	CAS:10319-14-9	C.I. Disperse Yellow 64	Oc1c(nc2c(c1Br)cccc2)C1C(=O)c2c(C1=O)cccc2	Inactive	1.91	4.09	Indanes	O=C1c2ccccc2C(=O)C1c1ccc2ccccc2n1				construction and building materials
444	CAS:122-64-5	Phenylmercuric lactate	CC(C(=O)O[Hg]c1ccccc1)O	Active	1.63	4.37	Benzene and substituted derivatives	c1ccccc1
445	CAS:13029-08-8	2,2'-Dichlorobiphenyl	Clc1ccccc1c1ccccc1Cl	Inactive	1.06	4.94	Benzene and substituted derivatives	c1ccc(-c2ccccc2)cc1	yes
446	CAS:13171-00-1	1-(6-tert-Butyl-1,1-dimethyl-2,3-dihydro-1H-inden-4-yl)ethanone	CC(=O)c1cc(cc2c1CCC2(C)C)C(C)(C)C	Inactive	1.57	4.43	Indanes	c1ccc2c(c1)CCC2			fragrance
447	CAS:2597-93-5	Ethylmercurichlorendimide	CC[Hg]N1C(=O)C2C(C1=O)C1(C(C2(Cl)C(=C1Cl)Cl)(Cl)Cl)Cl	Active	0.99	5.01	Isoindoles and derivatives	O=C1NC(=O)C2C3C=CC(C3)C12
448	CAS:30007-47-7	5-Bromo-5-nitro-1,3-dioxane	BrC1(COCOC1)[N+](=O)[O-]	Active	1.74	4.26	Dioxanes	C1COCOC1			preservative
449	CAS:54982-83-1	1,4-Dioxacyclohexadecane-5,16-dione	O=C1CCCCCCCCCCC(=O)OCCO1	Inactive	1.98	4.02	Macrolides and analogues	O=C1CCCCCCCCCCC(=O)OCCO1			fragrance	cleaning products and household care
450	CAS:145-39-1	1-tert-Butyl-3,4,5-trimethyl-2,6-dinitrobenzene	Cc1c(C)c([N+](=O)[O-])c(c(c1C)[N+](=O)[O-])C(C)(C)C	Inactive	1.73	4.27	Benzene and substituted derivatives	c1ccccc1
451	CAS:15086-94-9	2',4',5',7'-Tetrabromofluorescein	O=C1OC2(c3c1cccc3)c1cc(Br)c(c(c1Oc1c2cc(Br)c(c1Br)O)Br)O	Active	1.73	4.27	Benzopyrans	O=C1OC2(c3ccccc3Oc3ccccc32)c2ccccc21				personal care
452	CAS:17354-14-2	1,4-Bis(butylamino)anthracene-9,10-dione	CCCCNc1ccc(c2c1C(=O)c1c(C2=O)cccc1)NCCCC	Inactive	1.8	4.2	Anthracenes	O=C1c2ccccc2C(=O)c2ccccc21			dye|fragrance
453	CAS:2094-98-6	1,1'-Diazene-1,2-diyldicyclohexanecarbonitrile	N#CC1(CCCCC1)N=NC1(CCCCC1)C#N	Inactive	1.57	4.43	Organonitrogen compounds	C1CCC(N=NC2CCCCC2)CC1
454	CAS:29091-09-6	2,4-Dichloro-1,3-dinitro-5-(trifluoromethyl)benzene	[O-][N+](=O)c1cc(c(c(c1Cl)[N+](=O)[O-])Cl)C(F)(F)F	Active	1.72	4.28	Benzene and substituted derivatives	c1ccccc1
455	CAS:30124-94-8	Disperse Red 82	N#Cc1cc(ccc1/N=N/c1ccc(cc1)N(CCOC(=O)C)CCOC(=O)C)[N+](=O)[O-]	Active	1.79	4.21	Azobenzenes	c1ccc(N=Nc2ccccc2)cc1
456	CAS:41532-84-7	1,1,2-Trimethyl-1H-benzo[e]indole	CC1=Nc2c(C1(C)C)c1ccccc1cc2	Inactive	1.8	4.2	Naphthalenes	C1=Nc2ccc3ccccc3c2C1
457	CAS:52196-74-4	2-Chloro-1,4-diethoxybenzene	CCOc1ccc(c(c1)Cl)OCC	Inactive	1.81	4.19	Phenol ethers	c1ccccc1
458	CAS:54914-85-1	1,1'-[Ethane-1,2-diylbis(oxy)]bis(3-methylbenzene)	Cc1cccc(c1)OCCOc1cccc(c1)C	Inactive	1.53	4.47	Phenol ethers	c1ccc(OCCOc2ccccc2)cc1
459	CAS:5495-84-1	2-(Propan-2-yl)-9H-thioxanthen-9-one	CC(c1ccc2c(c1)c(=O)c1c(s2)cccc1)C	Active	1.87	4.13	Thiochromenes	O=c1c2ccccc2sc2ccccc12	yes
460	CAS:6928-67-2	Dipropyl 3,4,5,6-tetrachlorobenzene-1,2-dicarboxylate	CCCOC(=O)c1c(C(=O)OCCC)c(Cl)c(c(c1Cl)Cl)Cl	Inactive	1.52	4.48	Benzene and substituted derivatives	c1ccccc1
461	CAS:93-00-5	6-Aminonaphthalene-2-sulfonic acid	Nc1ccc2c(c1)ccc(c2)S(=O)(=O)O	Inactive	2.04	3.96	Naphthalenes	c1ccc2ccccc2c1
462	CAS:10287-53-3	Parbenate	CCOC(=O)c1ccc(cc1)N(C)C	Inactive	1.82	4.18	Benzene and substituted derivatives	c1ccccc1				personal care
463	CAS:105-95-3	1,4-Dioxacycloheptadecane-5,17-dione	O=C1CCCCCCCCCCCC(=O)OCCO1	Inactive	1.57	4.43	Macrolides and analogues	O=C1CCCCCCCCCCCC(=O)OCCO1			dehydrating agent|fragrance	cleaning products and household care|personal care
464	CAS:1134-04-9	2,3,4,5-Tetrachloro-6-(trichloromethyl)pyridine	Clc1nc(c(c(c1Cl)Cl)Cl)C(Cl)(Cl)Cl	Active	1.42	4.58	Pyridines and derivatives	c1ccncc1
465	CAS:116-81-4	1-Amino-4-bromo-9,10-dioxo-9,10-dihydroanthracene-2-sulfonic acid	Brc1cc(c(c2c1C(=O)c1ccccc1C2=O)N)S(=O)(=O)O	Inactive	1.85	4.15	Anthracenes	O=C1c2ccccc2C(=O)c2ccccc21
466	CAS:119313-12-1	2-Benzyl-2-(dimethylamino)-1-[4-(morpholin-4-yl)phenyl]butan-1-one	CCC(C(=O)c1ccc(cc1)N1CCOCC1)(N(C)C)Cc1ccccc1	Inactive	1.8	4.2	Linear 1,3-diarylpropanoids	O=C(CCc1ccccc1)c1ccc(N2CCOCC2)cc1				construction and building materials
467	CAS:119-40-4	4-Hydroxy-7-(phenylamino)naphthalene-2-sulfonic acid	Oc1cc(cc2c1ccc(c2)Nc1ccccc1)S(=O)(=O)O	Inactive	1.95	4.05	Naphthalenes	c1ccc(Nc2ccc3ccccc3c2)cc1
468	CAS:18127-01-0	3-(4-tert-Butylphenyl)propanal	O=CCCc1ccc(cc1)C(C)(C)C	Inactive	1.56	4.44	Benzene and substituted derivatives	c1ccccc1			fragrance	cleaning products and household care|vehicle
469	CAS:5232-99-5	Ethyl 2-cyano-3,3-diphenylacrylate	CCOC(=O)C(=C(c1ccccc1)c1ccccc1)C#N	Inactive	2.2	3.8	Benzene and substituted derivatives	C=C(c1ccccc1)c1ccccc1			UV stabilizer	personal care
470	CAS:15905-32-5	Erythrosin B	O=C1OC2(c3c1cccc3)c1cc(I)c(c(c1Oc1c2cc(I)c(c1I)O)I)O	Active	1.05	4.95	Benzopyrans	O=C1OC2(c3ccccc3Oc3ccccc32)c2ccccc21
471	CAS:3278-89-5	1,3,5-Tribromo-2-(prop-2-en-1-yloxy)benzene	C=CCOc1c(Br)cc(cc1Br)Br	Active	1.63	4.37	Phenol ethers	c1ccccc1	yes
472	CAS:41424-36-6	1,3,5-Tribromo-2-methoxy-4-methylbenzene	COc1c(Br)cc(c(c1Br)C)Br	Inactive	1.87	4.13	Phenol ethers	c1ccccc1			fragrance
473	CAS:42594-17-2	Octahydro-1H-4,7-methanoindene-1,5-diyldimethanediyl bisprop-2-enoate	C=CC(=O)OCC1CC2CC1C1C2C(CC1)COC(=O)C=C	Active	1.73	4.27	Prenol lipids	C1CC2C3CCC(C3)C2C1
474	CAS:4273-98-7	2-(Phenylsulfonyl)aniline	Nc1ccccc1S(=O)(=O)c1ccccc1	Inactive	1.92	4.08	Benzene and substituted derivatives	O=S(=O)(c1ccccc1)c1ccccc1
475	CAS:79-74-3	2,5-Bis(2-methylbutan-2-yl)benzene-1,4-diol	CCC(c1cc(O)c(cc1O)C(CC)(C)C)(C)C	Active	2.03	3.97	Benzene and substituted derivatives	c1ccccc1			antioxidant
476	CAS:86-20-4	9-Ethyl-3-nitro-9H-carbazole	CCn1c2ccc(cc2c2c1cccc2)[N+](=O)[O-]	Inactive	1.5	4.5	Indoles and derivatives	c1ccc2c(c1)[nH]c1ccccc12
477	CAS:88485-37-4	Fluxofenim	FC(C(=NOCC1OCCO1)c1ccc(cc1)Cl)(F)F	Inactive	1.91	4.09	Benzene and substituted derivatives	C(=NOCC1OCCO1)c1ccccc1
478	CAS:57808-66-9	Domperidone	Clc1ccc2c(c1)[nH]c(=O)n2C1CCN(CC1)CCCn1c(=O)[nH]c2c1cccc2	Inactive	1.97	4.03	Benzimidazoles	O=c1[nH]c2ccccc2n1CCCN1CCC(n2c(=O)[nH]c3ccccc32)CC1
479	CAS:21256-18-8	Oxaprozin	OC(=O)CCc1nc(c(o1)c1ccccc1)c1ccccc1	Inactive	1.19	4.81	Azoles	c1ccc(-c2ncoc2-c2ccccc2)cc1
480	CAS:60719-82-6	Alaproclate	CC(C(=O)OC(Cc1ccc(cc1)Cl)(C)C)N	Inactive	2.2	3.8	Carboxylic acids and derivatives	c1ccccc1
481	CAS:1841-19-6	Fluspirilene	Fc1ccc(cc1)C(c1ccc(cc1)F)CCCN1CCC2(CC1)C(=O)NCN2c1ccccc1	Inactive	1.65	4.35	Benzene and substituted derivatives	O=C1NCN(c2ccccc2)C12CCN(CCCC(c1ccccc1)c1ccccc1)CC2
482	CAS:2447-54-3	Sanguinarine	C[n+]1cc2c3OCOc3ccc2c2c1c1cc3OCOc3cc1cc2	Inactive	1.28	4.72	Benzophenanthridine alkaloids	c1cc2c(c[nH+]c3c4cc5c(cc4ccc23)OCO5)c2c1OCO2
483	CAS:141-94-6	Hexetidine	CCCCC(CN1CN(CC(CCCC)CC)CC(C1)(C)N)CC	Active	1.42	4.58	Diazinanes	C1CNCNC1			no specific technical function|preservative
484	CAS:149-16-6	Butacaine	CCCCN(CCCC)CCCOC(=O)c1ccc(cc1)N	Inactive	1.34	4.66	Benzene and substituted derivatives	c1ccccc1
485	CAS:3416-26-0	Lidoflazine	O=C(Nc1c(C)cccc1C)CN1CCN(CC1)CCCC(c1ccc(cc1)F)c1ccc(cc1)F	Inactive	1.61	4.39	Benzene and substituted derivatives	O=C(CN1CCN(CCCC(c2ccccc2)c2ccccc2)CC1)Nc1ccccc1
486	CAS:40828-46-4	Suprofen	OC(=O)C(c1ccc(cc1)C(=O)c1cccs1)C	Inactive	1.11	4.89	Organooxygen compounds	O=C(c1ccccc1)c1cccs1
487	CAS:81110-73-8	Racecadotril	O=C(CNC(=O)[C@H](Cc1ccccc1)CSC(=O)C)OCc1ccccc1	Inactive	2.2	3.8	Carboxylic acids and derivatives	O=C(CCc1ccccc1)NCC(=O)OCc1ccccc1
488	CAS:20559-55-1	Oxibendazole	CCCOc1ccc2c(c1)nc([nH]2)NC(=O)OC	Inactive	1.73	4.27	Benzimidazoles	c1ccc2[nH]cnc2c1
489	CAS:60628-96-8	Bifonazole	c1ccc(cc1)c1ccc(cc1)C(n1ccnc1)c1ccccc1	Inactive	1.61	4.39	Benzene and substituted derivatives	c1ccc(-c2ccc(C(c3ccccc3)n3ccnc3)cc2)cc1			biocide|cleaning agent, humectant
490	CAS:57524-89-7	Hydrocortisone valerate	CCCCC(=O)O[C@@]1(CC[C@@H]2[C@]1(C)C[C@H](O)[C@H]1[C@H]2CCC2=CC(=O)CC[C@]12C)C(=O)CO	Inactive	1.42	4.58	Steroids and steroid derivatives	O=C1C=C2CCC3C4CCCC4CCC3C2CC1
491	CAS:848-53-3	Homochlorcyclizine	CN1CCCN(CC1)C(c1ccc(cc1)Cl)c1ccccc1	Inactive	1.65	4.35	Benzene and substituted derivatives	c1ccc(C(c2ccccc2)N2CCCNCC2)cc1
492	CAS:1166-34-3	Cinanserin	CN(CCCSc1ccccc1NC(=O)/C=C/c1ccccc1)C	Inactive	1.37	4.63	Cinnamic acids and derivatives	O=C(C=Cc1ccccc1)Nc1ccccc1
493	CAS:90293-01-9	Bifemelane	CNCCCCOc1ccccc1Cc1ccccc1	Inactive	1.37	4.63	Benzene and substituted derivatives	c1ccc(Cc2ccccc2)cc1
494	CID:14950	Cochineal	OCC1OC(C(C(C1O)O)O)c1c(O)c2c(c(c1O)O)C(=O)c1c(C2=O)c(C)c(c(c1)O)C(=O)O	Inactive	1.51	4.49	Anthracenes	O=C1c2ccccc2C(=O)c2cc(C3CCCCO3)ccc21			dye|fragrance
495	CAS:35943-35-2	Tricirbine	OC[C@H]1O[C@H]([C@@H]([C@@H]1O)O)n1cc2c3c1ncnc3N(N=C2N)C	Inactive	1.21	4.79	Organooxygen compounds	C1=NNc2ncnc3c2c1cn3C1CCCO1
496	CAS:4245-41-4	Estradiol acetate	CC(=O)Oc1ccc2c(c1)CC[C@@H]1[C@@H]2CC[C@]2([C@H]1CC[C@@H]2O)C	Inactive	1.52	4.48	Steroids and steroid derivatives	c1ccc2c(c1)CCC1C2CCC2CCCC21
497	CAS:25122-46-7	Clobetasol propionate	CCC(=O)O[C@@]1([C@@H](C)C[C@@H]2[C@]1(C)C[C@H](O)[C@]1([C@H]2CCC2=CC(=O)C=C[C@]12C)F)C(=O)CCl	Inactive	1.13	4.87	Steroids and steroid derivatives	O=C1C=CC2C(=C1)CCC1C3CCCC3CCC21				personal care
498	CAS:145158-71-0	Tegaserod	CCCCCNC(=N)N/N=C/c1c[nH]c2c1cc(OC)cc2	Active	1.53	4.47	Indoles and derivatives	c1ccc2[nH]ccc2c1
499	CAS:481-49-2	Cepharanthine	COc1cc2CCN([C@H]3c2cc1Oc1c2c(CCN([C@H]2Cc2ccc(Oc4cc(C3)ccc4OC)cc2)C)cc2c1OCO2)C	Active	1.53	4.47		c1cc2cc(c1)Oc1ccc(cc1)CC1NCCc3cc4c(c(c31)Oc1ccc3c(c1)C(C2)NCC3)OCO4
500	CAS:27591-97-5	Tilorone	CCN(CCOc1ccc2-c3c(C(=O)c2c1)cc(cc3)OCCN(CC)CC)CC	Active	1.44	4.56	Fluorenes	O=C1c2ccccc2-c2ccccc21
501	CAS:109826-26-8	Zaldaride	O=c1[nH]c2c(n1C1CCN(CC1)CC1(C)OCc3c(-n4c1ccc4)cccc3)cccc2	Inactive	1.25	4.75	Benzimidazoles	O=c1[nH]c2ccccc2n1C1CCN(CC2OCc3ccccc3-n3cccc32)CC1
502	CAS:103420-77-5	Devazepide	O=C(c1cc2c([nH]1)cccc2)N[C@H]1N=C(c2ccccc2)c2c(N(C1=O)C)cccc2	Inactive	1.23	4.77	Carboxylic acids and derivatives	O=C(NC1N=C(c2ccccc2)c2ccccc2NC1=O)c1cc2ccccc2[nH]1
503	CAS:67121-76-0	Fluperlapine	CN1CCN(CC1)C1=Nc2cc(F)ccc2Cc2c1cccc2	Inactive	1.78	4.22	Benzazepines	c1ccc2c(c1)Cc1ccccc1C(N1CCNCC1)=N2
504	CAS:92623-83-1	Pravadoline	COc1ccc(cc1)C(=O)c1c(C)n(c2c1cccc2)CCN1CCOCC1	Inactive	1.4	4.6	Indoles and derivatives	O=C(c1ccccc1)c1cn(CCN2CCOCC2)c2ccccc12
505	CAS:547-91-1	Loretin	Ic1cc(c2c(c1O)nccc2)S(=O)(=O)O	Inactive	1.43	4.57	Quinolines and derivatives	c1ccc2ncccc2c1
506	CAS:886-08-8	Norletimol	Oc1ccccc1C=NCc1ccccc1	Inactive	1.56	4.44	Phenols	C(=NCc1ccccc1)c1ccccc1
507	CAS:33414-30-1	Ftormetazine	CN1CCN(CC1)CCC(=O)N1c2ccccc2Sc2c1cc(cc2)C(F)(F)F	Active	1.4	4.6	Benzothiazines	O=C(CCN1CCNCC1)N1c2ccccc2Sc2ccccc21
508	CAS:321-55-1	Haloxon	ClCCOP(=O)(Oc1ccc2c(c1)oc(=O)c(c2C)Cl)OCCCl	Inactive	1.63	4.37	Coumarins and derivatives	O=c1ccc2ccccc2o1
509	CAS:1641-17-4	Mexenone	COc1ccc(c(c1)O)C(=O)c1ccc(cc1)C	Active	2.14	3.86	Benzene and substituted derivatives	O=C(c1ccccc1)c1ccccc1			UV stabilizer
510	CAS:2898-13-7	Sulazepam	Clc1ccc2c(c1)C(=NCC(=S)N2C)c1ccccc1	Inactive	1.58	4.42	Benzodiazepines	S=C1CN=C(c2ccccc2)c2ccccc2N1
511	CAS:3810-35-3	Tenonitrozole	O=C(c1cccs1)Nc1ncc(s1)[N+](=O)[O-]	Inactive	-1.08	7.08	Azoles	O=C(Nc1nccs1)c1cccs1
512	CAS:53772-82-0	cis-Flupentixol	OCCN1CCN(CC1)CC/C=C\1/c2ccccc2Sc2c1cc(cc2)C(F)(F)F	Inactive	1.64	4.36	Benzothiopyrans	C(CCN1CCNCC1)=C1c2ccccc2Sc2ccccc21
513	CAS:168273-06-1	Rimonabant	Clc1ccc(cc1)c1c(C)c(nn1c1ccc(cc1Cl)Cl)C(=O)NN1CCCCC1	Inactive	1.49	4.51	Azoles	O=C(NN1CCCCC1)c1cc(-c2ccccc2)n(-c2ccccc2)n1
514	CAS:59937-28-9	Malotilate	CC(OC(=O)C(=C1SC=CS1)C(=O)OC(C)C)C	Inactive	1.04	4.96	Carboxylic acids and derivatives	C=C1SC=CS1
515	CAS:88678-31-3	Liranaftate	COc1cccc(n1)N(C(=S)Oc1ccc2c(c1)CCCC2)C	Inactive	1.74	4.26	Tetralins	S=C(Nc1ccccn1)Oc1ccc2c(c1)CCCC2
516	CAS:106685-40-9	Adapalene	COc1ccc(cc1C12CC3CC(C2)CC(C1)C3)c1ccc2c(c1)ccc(c2)C(=O)O	Inactive	0.36	5.64	Prenol lipids	c1cc(-c2ccc3ccccc3c2)cc(C23CC4CC(CC(C4)C2)C3)c1
517	CAS:79094-20-5	Daltroban	OC(=O)Cc1ccc(cc1)CCNS(=O)(=O)c1ccc(cc1)Cl	Inactive	0.92	5.08	Benzene and substituted derivatives	O=S(=O)(NCCc1ccccc1)c1ccccc1
518	CAS:78-41-1	Triparanol	CCN(CCOc1ccc(cc1)C(c1ccc(cc1)C)(Cc1ccc(cc1)Cl)O)CC	Active	1.91	4.09	Stilbenes	c1ccc(CC(c2ccccc2)c2ccccc2)cc1
519	CAS:152-43-2	Quinestrol	C#C[C@]1(O)CC[C@@H]2[C@]1(C)CC[C@H]1[C@H]2CCc2c1ccc(c2)OC1CCCC1	Inactive	1.37	4.63	Steroids and steroid derivatives	c1cc2c(cc1OC1CCCC1)CCC1C2CCC2CCCC21
520	CAS:21245-01-2	Padimate	CC(CCOC(=O)c1ccc(cc1)N(C)C)C	Inactive	1.55	4.45	Benzene and substituted derivatives	c1ccccc1				personal care
521	CAS:532-11-6	Anethole trithione	COc1ccc(cc1)c1ssc(=S)c1	Inactive	1.22	4.78	Phenol ethers	S=c1cc(-c2ccccc2)ss1
522	CAS:231277-92-2	Lapatinib	Fc1cccc(c1)COc1ccc(cc1Cl)Nc1ncnc2c1cc(cc2)c1ccc(o1)CNCCS(=O)(=O)C	Inactive	1.48	4.52	Diazanaphthalenes	c1ccc(COc2ccc(Nc3ncnc4ccc(-c5ccco5)cc34)cc2)cc1
523	CAS:78613-35-1	Amorolfine	CCC(c1ccc(cc1)CC(CN1C[C@H](C)O[C@@H](C1)C)C)(C)C	Active	1.5	4.5	Benzene and substituted derivatives	c1ccc(CCCN2CCOCC2)cc1
524	CAS:25875-51-8	Robenidine	N=C(NN=Cc1ccc(cc1)Cl)NN=Cc1ccc(cc1)Cl	Inactive	1.35	4.65	Benzene and substituted derivatives	N=C(NN=Cc1ccccc1)NN=Cc1ccccc1
525	CAS:25122-57-0	Clobetasone butyrate	CCCC(=O)O[C@@]1([C@@H](C)C[C@@H]2[C@]1(C)CC(=O)[C@]1([C@H]2CCC2=CC(=O)C=C[C@]12C)F)C(=O)CCl	Inactive	-0.86	6.86	Steroids and steroid derivatives	O=C1C=CC2C(=C1)CCC1C3CCCC3CC(=O)C21
526	CAS:94497-51-5	Tamibarotene	O=C(c1ccc(cc1)C(=O)O)Nc1ccc2c(c1)C(C)(C)CCC2(C)C	Inactive	1.81	4.19	Tetralins	O=C(Nc1ccc2c(c1)CCCC2)c1ccccc1
527	CAS:27589-33-9	Azosemide	Clc1cc(NCc2cccs2)c(cc1S(=O)(=O)N)c1nnn[nH]1	Inactive	1.44	4.56	Azoles	c1csc(CNc2ccccc2-c2nnn[nH]2)c1
528	CAS:212141-54-3	Vatalanib	Clc1ccc(cc1)Nc1nnc(c2c1cccc2)Cc1ccncc1	Inactive	1.27	4.73	Diazanaphthalenes	c1ccc(Nc2nnc(Cc3ccncc3)c3ccccc23)cc1
529	CAS:35189-28-7	Norgestimate	O/N=C/1\CC[C@H]2C(=C1)CC[C@@H]1[C@@H]2CC[C@]2([C@H]1CC[C@]2(C#C)OC(=O)C)CC	Active	-0.13	6.13	Steroids and steroid derivatives	N=C1C=C2CCC3C4CCCC4CCC3C2CC1
530	CAS:15362-40-0	1-(2,6-Dichlorophenyl)-2-indolinone	O=C1Cc2c(N1c1c(Cl)cccc1Cl)cccc2	Inactive	1.76	4.24	Indoles and derivatives	O=C1Cc2ccccc2N1c1ccccc1
531	CAS:502-72-7	Cyclopentadecanone	O=C1CCCCCCCCCCCCCC1	Inactive	1.75	4.25	Organooxygen compounds	O=C1CCCCCCCCCCCCCC1			deodorizer|fragrance
532	CAS:61295-41-8	3-(2-Methyl-3-furylthio)-4-heptanone	CCCC(=O)C(Sc1ccoc1C)CC	Inactive	1.6	4.4	Thioethers	c1ccoc1
533	CAS:117-83-9	Bis(2-butoxyethyl) phthalate	CCCCOCCOC(=O)c1ccccc1C(=O)OCCOCCCC	Inactive	1.79	4.21	Benzene and substituted derivatives	c1ccccc1
534	CAS:644-08-6	4-Phenyltoluene	Cc1ccc(cc1)c1ccccc1	Inactive	1.82	4.18	Benzene and substituted derivatives	c1ccc(-c2ccccc2)cc1
535	CAS:83834-59-7	2-Ethylhexyl trans-4-methoxycinnamate	CCCCC(COC(=O)/C=C/c1ccc(cc1)OC)CC	Inactive	1.54	4.46	Cinnamic acids and derivatives	c1ccccc1
536	CAS:145742-28-5	CP-122721	COc1ccc(cc1CN[C@H]1CCCN[C@H]1c1ccccc1)OC(F)(F)F	Active	1.95	4.05	Piperidines	c1ccc(CNC2CCCNC2c2ccccc2)cc1
537	CAS:186392-65-4	Ingliforib	O[C@@H]1CN(C[C@@H]1O)C(=O)[C@@H]([C@@H](NC(=O)c1cc2c([nH]1)ccc(c2)Cl)Cc1ccccc1)O	Inactive	1.63	4.37	Indoles and derivatives	O=C(NC(CC(=O)N1CCCC1)Cc1ccccc1)c1cc2ccccc2[nH]1
538	CAS:127308-82-1	Zamifenacin	c1ccc(cc1)C(c1ccccc1)O[C@@H]1CCCN(C1)CCc1ccc2c(c1)OCO2	Inactive	1.86	4.14	Benzene and substituted derivatives	c1ccc(C(OC2CCCN(CCc3ccc4c(c3)OCO4)C2)c2ccccc2)cc1
539	CAS:361343-19-3	Elzasonan	CN1CCN(CC1)c1ccccc1/C=C/1\SCCN(C1=O)c1ccc(c(c1)Cl)Cl	Active	1.82	4.18	Diazinanes	O=C1C(=Cc2ccccc2N2CCNCC2)SCCN1c1ccccc1
540	CAS:368832-42-2	CP-728663	CC[C@H]1CC[C@@H]([C@@H](N1)c1ccccc1)NCc1cc2N(C)C(=O)[C@H]3[C@@H](c2cc1OC)C3	Inactive	1.81	4.19	Piperidines	O=C1Nc2cc(CNC3CCCNC3c3ccccc3)ccc2C2CC12
541	CAS:291305-06-1	UK-373911	CN[C@H]1CC[C@H](c2c1cc(cc2)S(=O)(=O)N)c1ccc(c(c1)Cl)Cl	Active	1.85	4.15	Tetralins	c1ccc(C2CCCc3ccccc32)cc1
542	CAS:444610-91-7	PharmaGSID_47315	CCc1cc(SCc2sc(nc2CN2CCN(CC2)c2ccc(cc2)OC)c2ccc(cc2)C(F)(F)F)ccc1OCC(=O)O	Inactive	1.9	4.1	Diazinanes	c1ccc(SCc2sc(-c3ccccc3)nc2CN2CCN(c3ccccc3)CC2)cc1
543	CAS:219790-72-4	SB281832	OCC(n1cnc(c1c1ccnc(n1)Oc1ccccc1)c1ccc(cc1)F)CO	Inactive	1.35	4.65	Azoles	c1ccc(Oc2nccc(-c3[nH]cnc3-c3ccccc3)n2)cc1
544	CAS:155990-20-8	SR271425	O=CNCc1ccc(c2c1sc1ccc(cc1c2=O)OC)NCCN(CC)CC	Active	1.79	4.21	Thiochromenes	O=c1c2ccccc2sc2ccccc12
545	CAS:189003-92-7	Trelanserin	NC(=O)Cn1c(=O)cc(c2c1cc(F)cc2)CCN1CCN(CC1)c1nccc2c1ccs2	Inactive	1.93	4.07	Diazinanes	O=c1cc(CCN2CCN(c3nccc4sccc34)CC2)c2ccccc2[nH]1
546	CAS:439687-69-1	Nelivaptan	COc1cc(OC)ccc1S(=O)(=O)N1c2ccc(cc2[C@@](C1=O)(N1C[C@@H](C[C@H]1C(=O)N(C)C)O)c1ccccc1OC)Cl	Inactive	2.04	3.96	Carboxylic acids and derivatives	O=C1N(S(=O)(=O)c2ccccc2)c2ccccc2C1(c1ccccc1)N1CCCC1
547	NOCAS_47366	SAR115740	Fc1ccc2c(c1)cc(n2Cc1cccc(c1)F)C(=O)Nc1ccc2c(c1)cc[nH]2	Inactive	1.4	4.6	Indoles and derivatives	O=C(Nc1ccc2[nH]ccc2c1)c1cc2ccccc2n1Cc1ccccc1
548	CAS:725228-45-5	AVE5638	NCc1cccc(c1)C1CCN(CC1)C(=O)c1ccc(o1)C#Cc1ccccc1F	Active	1.88	4.12	Piperidines	O=C(c1ccc(C#Cc2ccccc2)o1)N1CCC(c2ccccc2)CC1
549	CAS:10402-33-2	Eugenyl phenylacetate	C=CCc1ccc(c(c1)OC)OC(=O)Cc1ccccc1	Inactive	1.74	4.26	Phenol esters	O=C(Cc1ccccc1)Oc1ccccc1			fragrance
550	CAS:78-37-5	Linalyl cinnamate	C=CC(OC(=O)C=Cc1ccccc1)(CCC=C(C)C)C	Inactive	1.61	4.39	Cinnamic acids and derivatives	c1ccccc1			fragrance
551	CID:560105	2,4-DB-isooctyl ester	CC(CCCCCOC(=O)CCCOc1ccc(cc1Cl)Cl)C	Inactive	1.84	4.16	Benzene and substituted derivatives	c1ccccc1
552	CAS:474-86-2	Equilin	Oc1ccc2c(c1)CC=C1[C@@H]2CC[C@]2([C@H]1CCC2=O)C	Inactive	1.68	4.32	Steroids and steroid derivatives	O=C1CCC2C3=CCc4ccccc4C3CCC12
553	CAS:1162-06-7	Triphenyllead acetate	CC(=O)O[Pb](c1ccccc1)(c1ccccc1)c1ccccc1	Active	1.44	4.56	Benzene and substituted derivatives	c1ccc([PbH](c2ccccc2)c2ccccc2)cc1
554	CAS:607-88-5	Salicylic acid p-tolyl ester	Cc1ccc(cc1)OC(=O)c1ccccc1O	Inactive	1.8	4.2	Depsides and depsidones	O=C(Oc1ccccc1)c1ccccc1			fragrance
555	CAS:22915-73-7	Hexane-1,6-diyl dibenzoate	O=C(c1ccccc1)OCCCCCCOC(=O)c1ccccc1	Inactive	1.66	4.34	Benzene and substituted derivatives	O=C(OCCCCCCOC(=O)c1ccccc1)c1ccccc1
556	CAS:25152-85-6	(3Z)-Hex-3-en-1-yl benzoate	CC/C=C\CCOC(=O)c1ccccc1	Inactive	1.63	4.37	Benzene and substituted derivatives	c1ccccc1			fragrance	cleaning products and household care
557	CAS:24817-51-4	2-Phenylethyl 2-methylbutanoate	CCC(C(=O)OCCc1ccccc1)C	Inactive	1.95	4.05	Fatty Acyls	c1ccccc1			fragrance
558	CAS:6290-37-5	2-Phenylethyl hexanoate	CCCCCC(=O)OCCc1ccccc1	Inactive	1.77	4.23	Fatty Acyls	c1ccccc1			fragrance
559	CAS:94-47-3	2-Phenylethyl benzoate	O=C(c1ccccc1)OCCc1ccccc1	Inactive	2.02	3.98	Benzene and substituted derivatives	O=C(OCCc1ccccc1)c1ccccc1			fragrance|softener and conditioner
560	CAS:79-78-7	Allyl Ionone	C=CCCC(=O)/C=C/C1C(=CCCC1(C)C)C	Inactive	1.82	4.18	Prenol lipids	C1=CCCCC1			fragrance	cleaning products and household care
561	CAS:103-52-6	2-Phenylethyl butanoate	CCCC(=O)OCCc1ccccc1	Inactive	1.43	4.57	Fatty Acyls	c1ccccc1			fragrance
562	CAS:103-53-7	2-Phenylethyl 3-phenylprop-2-enoate	O=C(C=Cc1ccccc1)OCCc1ccccc1	Active	1.72	4.28	Cinnamic acids and derivatives	O=C(C=Cc1ccccc1)OCCc1ccccc1			fragrance
563	CAS:109-29-5	Oxacycloheptadecan-2-one	O=C1CCCCCCCCCCCCCCCO1	Active	1.75	4.25	Macrolides and analogues	O=C1CCCCCCCCCCCCCCCO1			fragrance	cleaning products and household care
564	CAS:122-67-8	Isobutyl 3-phenylacrylate	CC(COC(=O)C=Cc1ccccc1)C	Inactive	1.45	4.55	Cinnamic acids and derivatives	c1ccccc1			fragrance
565	CAS:122-69-0	3-Phenyl-2-propen-1-yl 3-phenylacrylate	O=C(C=Cc1ccccc1)OCC=Cc1ccccc1	Inactive	1.77	4.23	Cinnamic acids and derivatives	O=C(C=Cc1ccccc1)OCC=Cc1ccccc1			fragrance
566	CAS:34413-35-9	5,6,7,8-Tetrahydroquinoxaline	C1CCc2c(C1)nccn2	Inactive	2.43	3.57	Diazines	c1cnc2c(n1)CCCC2			fragrance
567	CAS:55719-85-2	Phenethyl tiglate	C/C=C(/C(=O)OCCc1ccccc1)\C	Inactive	1.67	4.33	Fatty Acyls	c1ccccc1			fragrance
568	CAS:6707-60-4	12-Oxahexadecanolide	O=C1CCCCCCCCCCOCCCCO1	Inactive	1.51	4.49	Macrolides and analogues	O=C1CCCCCCCCCCOCCCCO1			fragrance
569	CAS:90-17-5	2,2,2-Trichloro-1-phenylethyl acetate	CC(=O)OC(C(Cl)(Cl)Cl)c1ccccc1	Inactive	1.7	4.3	Benzene and substituted derivatives	c1ccccc1			fragrance	cleaning products and household care
570	CAS:321-60-8	2-Fluorobiphenyl	Fc1ccccc1c1ccccc1	Inactive	1.92	4.08	Benzene and substituted derivatives	c1ccc(-c2ccccc2)cc1
571	CAS:4640-01-1	Methyl triclosan	COc1cc(Cl)ccc1Oc1ccc(cc1Cl)Cl	Inactive	1.96	4.04	Benzene and substituted derivatives	c1ccc(Oc2ccccc2)cc1
572	CAS:1470-57-1	2-Hydroxy-5-methylbenzophenone	Cc1ccc(c(c1)C(=O)c1ccccc1)O	Inactive	1.98	4.02	Benzene and substituted derivatives	O=C(c1ccccc1)c1ccccc1
573	CAS:778-22-3	2,2-Diphenylpropane	CC(c1ccccc1)(c1ccccc1)C	Inactive	1.93	4.07	Benzene and substituted derivatives	c1ccc(Cc2ccccc2)cc1
574	CAS:85-19-8	(5-Chloro-2-hydroxyphenyl)phenylmethanone	Clc1ccc(c(c1)C(=O)c1ccccc1)O	Inactive	1.96	4.04	Benzene and substituted derivatives	O=C(c1ccccc1)c1ccccc1			UV stabilizer
575	CAS:134-09-8	Menthyl anthranilate	CC1CCC(C(C1)OC(=O)c1ccccc1N)C(C)C	Active	1.62	4.38	Prenol lipids	O=C(OC1CCCCC1)c1ccccc1			UV stabilizer	personal care
576	CAS:36861-47-9	Enzacamene	Cc1ccc(cc1)C=C1C(=O)C2C(C1CC2)(C)C	Inactive	0.75	5.25	Prenol lipids	O=C1C(=Cc2ccccc2)C2CCC1C2	yes		UV stabilizer|fragrance
577	CAS:149413-74-1	FR150011	OC(=O)Cc1ccccc1COc1ccc2c(c1)cc(o2)c1scc(n1)C(C)(C)C	Active	1.74	4.26	Benzofurans	c1ccc(COc2ccc3oc(-c4nccs4)cc3c2)cc1
578	CAS:146011-65-6	FR145237	Cc1ccc2c(c1)c(c1ccc(cc1)Cl)c(o2)CN(C(=O)Nc1c(F)cc(cc1F)F)Cc1ccccc1	Inactive	-2.85	8.85	Benzofurans	O=C(Nc1ccccc1)N(Cc1ccccc1)Cc1oc2ccccc2c1-c1ccccc1
579	CAS:127-25-3	Methyl abietate	COC(=O)[C@]1(C)CCC[C@]2([C@H]1CC=C1[C@@H]2CCC(=C1)C(C)C)C	Inactive	1.87	4.13	Prenol lipids	C1=CC2=CCC3CCCCC3C2CC1			fragrance
580	CAS:13680-35-8	4,4'-Methylenebis(2,6-diethylaniline)	CCc1cc(Cc2cc(CC)c(c(c2)CC)N)cc(c1N)CC	Inactive	1.65	4.35	Benzene and substituted derivatives	c1ccc(Cc2ccccc2)cc1
581	CAS:1671-75-6	Heptanophenone	CCCCCCC(=O)c1ccccc1	Inactive	1.73	4.27	Organooxygen compounds	c1ccccc1
582	CAS:5407-98-7	Cyclobutyl phenyl ketone	O=C(c1ccccc1)C1CCC1	Inactive	2.41	3.59	Organooxygen compounds	O=C(c1ccccc1)C1CCC1
583	NOCAS_48505	PharmaGSID_48505	Clc1ccccc1C1=Nc2c(Nc3c1cc(cc3)[N+](=O)[O-])n[nH]c2C	Inactive	2.06	3.94	Benzodiazepines	c1ccc(C2=Nc3c[nH]nc3Nc3ccccc32)cc1
584	CAS:588941-45-1	PharmaGSID_48506	O=C([C@@H](c1ccc(c(c1)Cl)S(=O)(=O)C)CC1CCCC1)Nc1cnccn1	Inactive	1.86	4.14	Benzene and substituted derivatives	O=C(Nc1cnccn1)C(CC1CCCC1)c1ccccc1
585	NOCAS_48509	PharmaGSID_48509	CCCN([C@@H]1CCc2c(C1)cc(cc2)OC)C1CCN(CC1)C(=O)C1CCNCC1	Inactive	1.82	4.18	Tetralins	O=C(C1CCNCC1)N1CCC(NC2CCc3ccccc3C2)CC1
586	CAS:1062243-51-9	PharmaGSID_48511	COc1cc(ccc1Nc1ncc2c(n1)N(CC(C(=O)N2C)(F)F)C1CCCC1)C(=O)NC1CCN(CC1)C	Active	1.1	4.9	Pyrimidodiazepines	O=C1CCN(C2CCCC2)c2nc(Nc3ccc(C(=O)NC4CCNCC4)cc3)ncc2N1
587	CAS:107071-66-9	Ro 23-7637	O=C(N1CCC(CC1)C=C(c1ccccc1)c1ccccc1)CCCCCCCCc1cccnc1	Inactive	1.94	4.06	Benzene and substituted derivatives	O=C(CCCCCCCCc1cccnc1)N1CCC(C=C(c2ccccc2)c2ccccc2)CC1
588	CAS:686756-87-6	PharmaGSID_48519	OCC1COc2c(O1)ccc(c2)Nc1ncc2c(n1)N(C)C(=O)N(C2)c1ccccc1Br	Inactive	1.54	4.46	Benzodioxanes	O=C1Nc2nc(Nc3ccc4c(c3)OCCO4)ncc2CN1c1ccccc1
589	CAS:201530-41-8	Deferasirox	OC(=O)c1ccc(cc1)n1nc(nc1c1ccccc1O)c1ccccc1O	Active	1.29	4.71	Azoles	c1ccc(-c2nc(-c3ccccc3)n(-c3ccccc3)n2)cc1
590	CAS:187164-19-8	Luliconazole	N#C/C(=C\1/SC[C@H](S1)c1ccc(cc1Cl)Cl)/n1cncc1	Inactive	1.56	4.44	Benzene and substituted derivatives	C(=C1SCC(c2ccccc2)S1)n1ccnc1
591	CAS:122341-38-2	Temoporfin	Oc1cccc(c1)/C/1=C/2\CCC(=N2)/C(=c\2/cc/c(=C(/C3=N/C(=C(\c4[nH]c1cc4)/c1cccc(c1)O)/C=C3)\c1cccc(c1)O)/[nH]2)/c1cccc(c1)O	Active	1.17	4.83	Tetrapyrroles and derivatives	C1=Cc2nc1c(-c1ccccc1)c1ccc([nH]1)c(-c1ccccc1)c1nc(c(-c3ccccc3)c3ccc([nH]3)c2-c2ccccc2)CC1
592	CAS:155213-67-5	Ritonavir	O=C(N[C@H]([C@H](C[C@H](Cc1ccccc1)NC(=O)[C@H](C(C)C)NC(=O)N(Cc1csc(n1)C(C)C)C)O)Cc1ccccc1)OCc1cncs1	Inactive	1.58	4.42	Carboxylic acids and derivatives	O=C(CNC(=O)NCc1cscn1)NC(CCC(Cc1ccccc1)NC(=O)OCc1cncs1)Cc1ccccc1
593	CAS:141626-36-0	Dronedarone	CCCCc1oc2c(c1C(=O)c1ccc(cc1)OCCCN(CCCC)CCCC)cc(cc2)NS(=O)(=O)C	Active	1.54	4.46	Organooxygen compounds	O=C(c1ccccc1)c1coc2ccccc12
594	CAS:87151-85-7	Spiradoline	O=C(N([C@H]1CC[C@]2(C[C@@H]1N1CCCC1)CCCO2)C)Cc1ccc(c(c1)Cl)Cl	Inactive	0.27	5.73	Benzene and substituted derivatives	O=C(Cc1ccccc1)NC1CCC2(CCCO2)CC1N1CCCC1
595	CAS:300-39-0	3,5-Diiodo-L-tyrosine	OC(=O)[C@H](Cc1cc(I)c(c(c1)I)O)N	Inactive	-3.18	9.18	Carboxylic acids and derivatives	c1ccccc1
596	CAS:369-77-7	Cloflucarban	O=C(Nc1ccc(c(c1)C(F)(F)F)Cl)Nc1ccc(cc1)Cl	Active	1.62	4.38	Benzene and substituted derivatives	O=C(Nc1ccccc1)Nc1ccccc1			biocide|deodorizer
597	CAS:27959-26-8	Nicomolol	OC1C(CCCC1(COC(=O)c1cccnc1)COC(=O)c1cccnc1)(COC(=O)c1cccnc1)COC(=O)c1cccnc1	Inactive	-0.47	6.47	Carboxylic acids and derivatives	O=C(OCC1(COC(=O)c2cccnc2)CCCC(COC(=O)c2cccnc2)(COC(=O)c2cccnc2)C1)c1cccnc1
598	CAS:482-44-0	Imperatorin	CC(=CCOc1c2occc2cc2c1oc(=O)cc2)C	Inactive	1.35	4.65	Coumarins and derivatives	O=c1ccc2cc3ccoc3cc2o1
599	CAS:15387-18-5	Fezatione	Cc1ccc(cc1)/C=N/n1c(=S)scc1c1ccccc1	Inactive	1.39	4.61	Benzene and substituted derivatives	S=c1scc(-c2ccccc2)n1N=Cc1ccccc1
600	CAS:27877-51-6	Tolindate	Cc1cccc(c1)N(C(=S)Oc1ccc2c(c1)CCC2)C	Inactive	2.11	3.89	Indanes	S=C(Nc1ccccc1)Oc1ccc2c(c1)CCC2
601	CAS:89419-40-9	Mosapramine	Clc1ccc2c(c1)N(CCCN1CCC3(CC1)C(=O)NC1N3CCCC1)c1ccccc1CC2	Active	2.16	3.84	Benzazepines	O=C1NC2CCCCN2C12CCN(CCCN1c3ccccc3CCc3ccccc31)CC2
602	CAS:520-53-6	Psilocin	CN(CCc1c[nH]c2c1c(O)ccc2)C	Active	2.07	3.93	Indoles and derivatives	c1ccc2[nH]ccc2c1
603	CAS:267243-28-7	Canertinib	C=CC(=O)Nc1cc2c(ncnc2cc1OCCCN1CCOCC1)Nc1ccc(c(c1)Cl)F	Inactive	1.74	4.26	Diazanaphthalenes	c1ccc(Nc2ncnc3cc(OCCCN4CCOCC4)ccc23)cc1
604	CAS:1032350-13-2	MK-2206	O=c1[nH]nc2n1ccc1c2cc(c(n1)c1ccc(cc1)C1(N)CCC1)c1ccccc1	Active	1.52	4.48	Pyridines and derivatives	O=c1[nH]nc2c3cc(-c4ccccc4)c(-c4ccc(C5CCC5)cc4)nc3ccn12
605	CAS:106516-24-9	Sertindole	Clc1ccc2c(c1)c(cn2c1ccc(cc1)F)C1CCN(CC1)CCN1CCNC1=O	Active	1.58	4.42	Pyrroles	O=C1NCCN1CCN1CCC(c2cn(-c3ccccc3)c3ccccc23)CC1
606	CAS:170729-80-3	Aprepitant	Fc1ccc(cc1)[C@H]1[C@H](OCCN1Cc1[nH][nH]c(=O)n1)O[C@@H](c1cc(cc(c1)C(F)(F)F)C(F)(F)F)C	Inactive	2.2	3.8	Oxazinanes	O=c1nc(CN2CCOC(OCc3ccccc3)C2c2ccccc2)[nH][nH]1
607	CAS:319460-85-0	Axitinib	CNC(=O)c1ccccc1Sc1ccc2c(c1)[nH]nc2/C=C/c1ccccn1	Inactive	1.7	4.3	Thioethers	C(=Cc1n[nH]c2cc(Sc3ccccc3)ccc12)c1ccccn1
608	CAS:133454-47-4	Iloperidone	COc1cc(ccc1OCCCN1CCC(CC1)c1noc2c1ccc(c2)F)C(=O)C	Inactive	1.71	4.29	Organooxygen compounds	c1ccc(OCCCN2CCC(c3noc4ccccc34)CC2)cc1
609	CAS:171228-49-2	Posaconazole	CC[C@H](n1ncn(c1=O)c1ccc(cc1)N1CCN(CC1)c1ccc(cc1)OCC1CO[C@@](C1)(Cn1cncn1)c1ccc(cc1F)F)[C@@H](O)C	Active	1.43	4.57	Diazinanes	O=c1[nH]ncn1-c1ccc(N2CCN(c3ccc(OCC4COC(Cn5cncn5)(c5ccccc5)C4)cc3)CC2)cc1
610	CAS:74711-43-6	Zaltoprofen	OC(=O)C(c1ccc2c(c1)CC(=O)c1c(S2)cccc1)C	Inactive	1.39	4.61	Benzothiepins	O=C1Cc2ccccc2Sc2ccccc21
611	CAS:1210-12-4	9-Cyanoanthracene	N#Cc1c2ccccc2cc2c1cccc2	Inactive	2.45	3.55	Anthracenes	c1ccc2cc3ccccc3cc2c1
612	CAS:1210-39-5	3,3-Diphenylacrylaldehyde	O=CC=C(c1ccccc1)c1ccccc1	Inactive	1.43	4.57	Benzene and substituted derivatives	C=C(c1ccccc1)c1ccccc1
613	CAS:1468-95-7	9-Anthracenemethanol	OCc1c2ccccc2cc2c1cccc2	Inactive	-2.09	8.09	Anthracenes	c1ccc2cc3ccccc3cc2c1
614	CAS:215-58-7	Dibenz[a,c]anthracene	c1ccc2c(c1)cc1c(c2)c2ccccc2c2c1cccc2	Inactive	0.01	5.99	Phenanthrenes and derivatives	c1ccc2cc3c4ccccc4c4ccccc4c3cc2c1
615	CAS:3331-46-2	9,10-Dihydrobenzo[a]pyren-7(8H)-one	O=C1CCCc2c1cc1ccc3c4c1c2ccc4ccc3	Inactive	2.45	3.55	Pyrenes	O=C1CCCc2c1cc1ccc3cccc4ccc2c1c34
616	CAS:573-17-1	9-Bromophenanthrene	Brc1cc2ccccc2c2c1cccc2	Inactive	1.49	4.51	Phenanthrenes and derivatives	c1ccc2c(c1)ccc1ccccc12
617	CAS:96568-04-6	Ethyl 2,6-dichloro-5-fluoro-β-oxo-3-pyridinepropionate	CCOC(=O)CC(=O)c1cc(F)c(nc1Cl)Cl	Inactive	2.14	3.86	Pyridines and derivatives	c1ccncc1
618	CAS:533-75-5	Tropolone	Oc1cccccc1=O	Inactive	0.81	5.19	Tropones	O=c1cccccc1
619	CAS:541-59-3	Maleimide	O=C1C=CC(=O)N1	Active	1.92	4.08	Pyrrolidines	O=C1C=CC(=O)N1
620	CAS:84-15-1	o-Terphenyl	c1ccc(cc1)c1ccccc1c1ccccc1	Inactive	1.81	4.19	Benzene and substituted derivatives	c1ccc(-c2ccccc2-c2ccccc2)cc1
621	CAS:1139-30-6	(-)Carophyllene oxide	C=C1CC[C@H]2O[C@@]2(CC[C@@H]2[C@@H]1CC2(C)C)C	Inactive	1.9	4.1	Prenol lipids	C=C1CCC2OC2CCC2CCC12			fragrance	cleaning products and household care
622	CAS:134-85-0	4-Chlorobenzophenone	Clc1ccc(cc1)C(=O)c1ccccc1	Inactive	1.59	4.41	Benzene and substituted derivatives	O=C(c1ccccc1)c1ccccc1
623	CAS:1672-46-4	Digoxigenin	O[C@H]1CC[C@]2([C@@H](C1)CC[C@@H]1[C@@H]2C[C@@H](O)[C@]2([C@]1(O)CC[C@@H]2C1=CC(=O)OC1)C)C	Active	0.15	5.85	Steroids and steroid derivatives	O=C1C=C(C2CCC3C2CCC2C4CCCCC4CCC23)CO1
624	CAS:603-36-1	Triphenylstibine	c1ccc(cc1)[Sb](c1ccccc1)c1ccccc1	Inactive	2.16	3.84	Benzene and substituted derivatives	c1ccc([Sb](c2ccccc2)c2ccccc2)cc1
625	CAS:7005-72-3	4-Chlorodiphenyl ether	Clc1ccc(cc1)Oc1ccccc1	Inactive	1.78	4.22	Benzene and substituted derivatives	c1ccc(Oc2ccccc2)cc1
626	CAS:719-59-5	2-Amino-5-chlorobenzophenone	Clc1ccc(c(c1)C(=O)c1ccccc1)N	Inactive	1.94	4.06	Benzene and substituted derivatives	O=C(c1ccccc1)c1ccccc1		yes
627	CAS:75980-60-8	Diphenyl(2,4,6-trimethylbenzoyl)phosphine oxide	Cc1cc(C)c(c(c1)C)C(=O)P(=O)(c1ccccc1)c1ccccc1	Inactive	1.84	4.16	Benzene and substituted derivatives	O=C(c1ccccc1)P(=O)(c1ccccc1)c1ccccc1				construction and building materials
628	CAS:89-75-8	2,4-Dichlorobenzoyl chloride	Clc1ccc(c(c1)Cl)C(=O)Cl	Active	1.72	4.28	Benzene and substituted derivatives	c1ccccc1
629	CAS:107097-80-3	Loxiglumide	CCCCCN(C(=O)C(NC(=O)c1ccc(c(c1)Cl)Cl)CCC(=O)O)CCCOC	Inactive	0.23	5.77	Carboxylic acids and derivatives	c1ccccc1
630	CAS:119-48-2	Dimorpholamine	CCCCN(C(=O)N1CCOCC1)CCN(C(=O)N1CCOCC1)CCCC	Inactive	-0.42	6.42	Oxazinanes	O=C(NCCNC(=O)N1CCOCC1)N1CCOCC1
631	CAS:133-58-4	Nitromersol	[O-][N+](=O)c1ccc(c2c1[Hg]O2)C	Active	1.66	4.34	Benzene and substituted derivatives	c1ccc2c(c1)O[Hg]2
632	CAS:14929-11-4	Cholesolvin	O=C(C(Oc1ccc(cc1)Cl)(C)C)OCCCOC(=O)C(Oc1ccc(cc1)Cl)(C)C	Active	1.72	4.28	Benzene and substituted derivatives	O=C(COc1ccccc1)OCCCOC(=O)COc1ccccc1
633	CAS:153168-05-9	Pleconaril	Cc1noc(c1)CCCOc1c(C)cc(cc1C)c1noc(n1)C(F)(F)F	Inactive	1.41	4.59	Azoles	c1cc(CCCOc2ccc(-c3ncon3)cc2)on1
634	CAS:1986-53-4	Bolandiol dipropionate	CCC(=O)O[C@H]1CCC2C(=C1)CCC1C2CCC2(C1CC[C@@H]2OC(=O)CC)C	Active	2.2	3.8	Steroids and steroid derivatives	C1=C2CCC3C4CCCC4CCC3C2CCC1
635	CAS:211915-06-9	Dabigatran etexilate	CCCCCCOC(=O)/N=C(\c1ccc(cc1)NCc1nc2c(n1C)ccc(c2)C(=O)N(c1ccccn1)CCC(=O)OCC)/N	Inactive	1.83	4.17	Benzimidazoles	O=C(Nc1ccccn1)c1ccc2[nH]c(CNc3ccccc3)nc2c1
636	CAS:21228-13-7	Dorastine	CN1CCc2c(C1)c1cc(Cl)ccc1n2CCc1ccc(nc1)C	Inactive	1.67	4.33	Indoles and derivatives	c1cncc(CCn2c3c(c4ccccc42)CNCC3)c1
637	CAS:2265-64-7	Dexamethasone isonicotinate	O=C1C=C[C@]2(C(=C1)CC[C@@H]1[C@]2(F)[C@@H](O)C[C@]2([C@H]1C[C@H]([C@]2(O)C(=O)COC(=O)c1ccncc1)C)C)C	Inactive	1.53	4.47	Steroids and steroid derivatives	O=C1C=CC2C(=C1)CCC1C2CCC2C(C(=O)COC(=O)c3ccncc3)CCC21
638	CAS:292618-32-7	Gimatecan	CC[C@@]1(O)C(=O)OCc2c1cc1-c3nc4ccccc4c(c3Cn1c2=O)/C=N/OC(C)(C)C	Inactive	1.75	4.25	Camptothecins	O=C1Cc2cc3n(c(=O)c2CO1)Cc1cc2ccccc2nc1-3
639	CAS:40172-95-0	1-(2-Furoyl)piperazine	O=C(c1ccco1)N1CCNCC1	Inactive	1.39	4.61	Carboxylic acids and derivatives	O=C(c1ccco1)N1CCNCC1
640	CAS:40807-61-2	4-Phenylpiperidin-4-ol	OC1(CCNCC1)c1ccccc1	Inactive	-2.9	8.9	Piperidines	c1ccc(C2CCNCC2)cc1
641	CAS:47739-98-0	Clocapramine	Clc1ccc2c(c1)N(CCCN1CCC(CC1)(C(=O)N)N1CCCCC1)c1ccccc1CC2	Active	1.57	4.43	Benzazepines	c1ccc2c(c1)CCc1ccccc1N2CCCN1CCC(N2CCCCC2)CC1
642	CAS:56917-29-4	Fluretofene	C#Cc1ccc(cc1)c1ccccc1F	Inactive	2.2	3.8	Benzene and substituted derivatives	c1ccc(-c2ccccc2)cc1
643	CAS:67199-66-0	Daniquidone	Nc1ccc2c(c1)CN1C(=N2)c2c(C1=O)cccc2	Inactive	0.92	5.08	Diazanaphthalenes	O=C1c2ccccc2C2=Nc3ccccc3CN12
644	CAS:70-10-0	Ticlatone	Clc1ccc2c(c1)s[nH]c2=O	Inactive	1.37	4.63	Benzothiazoles	O=c1[nH]sc2ccccc12
645	CAS:74512-12-2	Omoconazole	Clc1ccc(cc1)OCCO/C(=C(\n1cncc1)/C)/c1ccc(cc1Cl)Cl	Inactive	1.42	4.58	Benzene and substituted derivatives	C(=C(OCCOc1ccccc1)c1ccccc1)n1ccnc1
646	CAS:7642-64-0	Nandrolone furylpropionate	O=C(O[C@H]1CC[C@@H]2[C@]1(C)CC[C@H]1[C@H]2CCC2=CC(=O)CC[C@H]12)CCc1ccco1	Inactive	1.73	4.27	Steroids and steroid derivatives	O=C1C=C2CCC3C(CCC4C(OC(=O)CCc5ccco5)CCC43)C2CC1
647	CAS:76738-96-0	Resocortol butyrate	CCCC(=O)O[C@@]1(CC[C@@H]2[C@]1(C)C[C@H](O)[C@H]1[C@H]2CCC2=CC(=O)CC[C@]12C)C(=O)CC	Inactive	1.64	4.36	Steroids and steroid derivatives	O=C1C=C2CCC3C4CCCC4CCC3C2CC1
648	CAS:979-02-2	Dehydropregnenolone acetate	CC(=O)O[C@H]1CC[C@]2(C(=CC[C@@H]3[C@@H]2CC[C@]2([C@H]3CC=C2C(=O)C)C)C1)C	Inactive	1.69	4.31	Steroids and steroid derivatives	C1=CC2CCC3C4CCCCC4=CCC3C2C1
649	CAS:98123-83-2	Epsiprantel	O=C(N1CC(=O)N2C(C1)c1ccccc1CCC2)C1CCCCC1	Inactive	1.07	4.93	Benzazepines	O=C(C1CCCCC1)N1CC(=O)N2CCCc3ccccc3C2C1
650	CAS:63134-33-8	BPS-MPE4	Oc1ccccc1S(=O)(=O)c1ccc(cc1)OCc1ccccc1	Inactive	1.83	4.17	Benzene and substituted derivatives	O=S(=O)(c1ccccc1)c1ccc(OCc2ccccc2)cc1	yes

## Sheet: Table S3
Table S3: Activity cliff classification of 79 activity cliff pairs identified in the TSHR agonist dataset. For each chemical pair, the table provides the chemical identifiers, computed chemical similarity by using the Tanimoto coefficient between the ECFP4 fingerprints, activity cliff classification using the workflow (Figure 1d) and formation of MMP-cliff. Note that the Tanimoto similarity and t…
Serial Number	First Chemical Identifier	Second Chemical Identifier	Tanimoto Similarity	Activity Difference (ΔpAC50)	Activity Cliff Classification	MMP-cliff
1	CAS:2398-37-0	CAS:2735-04-8	0.38	5.45	R-group cliff	No
2	CAS:2398-37-0	CAS:621-33-0	0.39	5.39	R-group cliff	No
3	CAS:163520-33-0	CAS:6624-73-3	0.36	4.63	Unclassified	No
4	CAS:38713-56-3	CAS:6624-73-3	0.36	4.62	Unclassified	No
5	CAS:1210-39-5	CAS:6624-73-3	0.46	4.6	Unclassified	No
6	CAS:6624-73-3	CAS:744-45-6	0.44	4.46	Unclassified	No
7	CID:34697	CAS:6624-73-3	0.41	4.44	Unclassified	No
8	CAS:6624-73-3	CAS:85-98-3	0.36	4.44	Unclassified	No
9	CAS:78613-35-1	CAS:80-46-6	0.38	4.36	Unclassified	No
10	CAS:1241-94-7	CAS:6624-73-3	0.36	4.33	Unclassified	No
11	CAS:6624-73-3	CAS:911-45-5	0.39	4.32	Unclassified	No
12	CAS:2449-05-0	CAS:6624-73-3	0.44	4.3	Unclassified	No
13	CAS:6624-73-3	CAS:68052-23-3	0.54	4.22	Unclassified	Yes
14	CAS:6624-73-3	CAS:82-99-5	0.36	4.15	Unclassified	No
15	CAS:509-78-4	CAS:6624-73-3	0.39	4.14	Unclassified	No
16	CAS:452-86-8	CAS:7683-59-2	0.42	4.06	R-group cliff	No
17	CAS:452-86-8	CAS:609-54-1	0.38	3.91	R-group cliff	No
18	CAS:6624-73-3	CAS:84-62-8	0.38	3.89	Unclassified	No
19	CAS:51-41-2	CAS:7683-59-2	0.6	3.68	R-group cliff	Yes
20	CAS:7683-59-2	CAS:829-74-3	0.57	3.22	R-group cliff	Yes
21	CAS:51-43-4	CAS:54239-37-1	0.37	3.11	R-group cliff	No
22	CAS:60-92-4	CAS:61-19-8	0.51	3.08	Unclassified	No
23	CAS:603-36-1	CAS:900-95-8	0.51	2.91	Scaffold/R-group cliff	Yes
24	CAS:18559-94-9	CAS:51-41-2	0.4	2.91	R-group cliff	No
25	CAS:74-31-7	CAS:900-95-8	0.38	2.89	Unclassified	No
26	CAS:163520-33-0	CAS:900-95-8	0.35	2.81	Unclassified	No
27	CAS:4097-22-7	CAS:60-92-4	0.44	2.79	Unclassified	No
28	CAS:1210-39-5	CAS:900-95-8	0.36	2.78	Unclassified	No
29	CAS:135-88-6	CAS:900-95-8	0.36	2.7	Unclassified	No
30	CAS:90-30-2	CAS:900-95-8	0.37	2.66	Unclassified	No
31	CAS:744-45-6	CAS:900-95-8	0.41	2.64	Unclassified	No
32	CAS:791-31-1	CAS:900-95-8	0.5	2.63	Scaffold/R-group cliff	Yes
33	CAS:603-33-8	CAS:900-95-8	0.51	2.61	Scaffold/R-group cliff	Yes
34	CAS:10527-16-9	CAS:2243-61-0	0.36	2.58	Unclassified	No
35	CAS:123318-82-1	CAS:60-92-4	0.36	2.58	Unclassified	No
36	CAS:603-36-1	CAS:76-87-9	0.57	2.57	Scaffold/R-group cliff	Yes
37	CAS:379-52-2	CAS:603-36-1	0.57	2.55	Scaffold/R-group cliff	Yes
38	CAS:74-31-7	CAS:76-87-9	0.42	2.54	Unclassified	No
39	CAS:2081-08-5	CAS:447-41-6	0.39	2.54	Unclassified	No
40	CAS:379-52-2	CAS:74-31-7	0.42	2.52	Unclassified	No
41	CAS:76-87-9	CAS:80-10-4	0.38	2.51	Unclassified	No
42	CAS:379-52-2	CAS:80-10-4	0.38	2.49	Unclassified	No
43	CAS:30392-40-6	CAS:62658-63-3	0.35	2.48	Unclassified	No
44	CAS:51-43-4	CAS:7683-59-2	0.7	2.47	R-group cliff	Yes
45	CAS:1210-39-5	CAS:76-87-9	0.36	2.44	Unclassified	No
46	CAS:7683-59-2	CAS:99-45-6	0.39	2.43	R-group cliff	No
47	CAS:1210-39-5	CAS:379-52-2	0.36	2.42	Unclassified	No
48	CAS:603-36-1	CAS:639-58-7	0.57	2.37	Scaffold/R-group cliff	Yes
49	CAS:135-88-6	CAS:76-87-9	0.39	2.35	Unclassified	No
50	CAS:639-58-7	CAS:74-31-7	0.42	2.35	Unclassified	No
51	CAS:135-88-6	CAS:379-52-2	0.39	2.33	Unclassified	No
52	CAS:620-40-6	CAS:900-95-8	0.46	2.33	Unclassified	Yes
53	CAS:639-58-7	CAS:80-10-4	0.4	2.31	Unclassified	No
54	CAS:76-87-9	CAS:90-30-2	0.41	2.31	Unclassified	No
55	CAS:744-45-6	CAS:76-87-9	0.39	2.3	Unclassified	No
56	CAS:379-52-2	CAS:90-30-2	0.41	2.29	Unclassified	No
57	CAS:76-87-9	CAS:791-31-1	0.57	2.29	Scaffold cliff	Yes
58	CAS:379-52-2	CAS:744-45-6	0.39	2.28	Unclassified	No
59	CAS:379-52-2	CAS:791-31-1	0.55	2.27	Scaffold/R-group cliff	Yes
60	CAS:603-33-8	CAS:76-87-9	0.57	2.26	Scaffold/R-group cliff	Yes
61	CAS:886-38-4	CAS:900-95-8	0.36	2.26	Unclassified	No
62	CAS:1210-39-5	CAS:639-58-7	0.36	2.25	Unclassified	No
63	CID:158333	CAS:900-95-8	0.41	2.24	Unclassified	No
64	CAS:379-52-2	CAS:603-33-8	0.57	2.24	Scaffold/R-group cliff	Yes
65	CID:6528	CAS:900-95-8	0.38	2.22	Unclassified	No
66	CAS:2772-45-4	CAS:76-87-9	0.37	2.22	Unclassified	No
67	CAS:2772-45-4	CAS:379-52-2	0.36	2.2	Unclassified	No
68	CAS:135-88-6	CAS:639-58-7	0.39	2.16	Unclassified	No
69	CAS:639-58-7	CAS:90-30-2	0.41	2.12	Unclassified	No
70	CAS:115-86-6	CAS:900-95-8	0.48	2.11	Unclassified	Yes
71	CAS:639-58-7	CAS:744-45-6	0.39	2.11	Unclassified	No
72	CAS:101-54-2	CAS:1205-64-7	0.58	2.1	R-group cliff	No
73	CAS:639-58-7	CAS:791-31-1	0.55	2.09	Scaffold/R-group cliff	Yes
74	CAS:101-54-2	CAS:74-31-7	0.53	2.09	Unclassified	Yes
75	CAS:1468-95-7	CAS:2243-61-0	0.37	2.08	Unclassified	No
76	CAS:84-62-8	CAS:900-95-8	0.46	2.07	Unclassified	No
77	CAS:603-33-8	CAS:639-58-7	0.57	2.07	Scaffold/R-group cliff	Yes
78	CAS:2772-45-4	CAS:639-58-7	0.36	2.02	Unclassified	No
79	CAS:2835-99-6	CAS:533-31-3	0.36	2.01	Unclassified	No

## Sheet: Table S4
Table S4: List of 9 activity cliff generators (ACGs) identified using the SAS map in the TSHR agonist dataset. For each ACG, the table provides the chemicals which form activity cliffs (separated by '|' symbol) and the number of activity cliff pairs.
Serial Number	Activity Cliff Generator	Chemical Identifiers	Number of Activity Cliff Pairs
1	CAS:900-95-8	CAS:90-30-2|CAS:603-33-8|CAS:84-62-8|CAS:603-36-1|CAS:744-45-6|CAS:886-38-4|CAS:791-31-1|CAS:115-86-6|CAS:158333|CAS:135-88-6|CAS:6528|CAS:163520-33-0|CAS:620-40-6|CAS:74-31-7|CAS:1210-39-5	15
2	CAS:6624-73-3	CAS:38713-56-3|CAS:34697|CAS:82-99-5|CAS:744-45-6|CAS:84-62-8|CAS:68052-23-3|CAS:85-98-3|CAS:911-45-5|CAS:2449-05-0|CAS:509-78-4|CAS:1241-94-7|CAS:163520-33-0|CAS:1210-39-5	13
3	CAS:379-52-2	CAS:90-30-2|CAS:603-33-8|CAS:603-36-1|CAS:744-45-6|CAS:791-31-1|CAS:80-10-4|CAS:2772-45-4|CAS:135-88-6|CAS:74-31-7|CAS:1210-39-5	10
4	CAS:76-87-9	CAS:90-30-2|CAS:603-33-8|CAS:603-36-1|CAS:744-45-6|CAS:791-31-1|CAS:80-10-4|CAS:2772-45-4|CAS:135-88-6|CAS:74-31-7|CAS:1210-39-5	10
5	CAS:639-58-7	CAS:90-30-2|CAS:603-33-8|CAS:603-36-1|CAS:744-45-6|CAS:791-31-1|CAS:80-10-4|CAS:2772-45-4|CAS:135-88-6|CAS:74-31-7|CAS:1210-39-5	10
6	CAS:744-45-6	CAS:76-87-9|CAS:6624-73-3|CAS:639-58-7|CAS:900-95-8|CAS:379-52-2	5
7	CAS:1210-39-5	CAS:76-87-9|CAS:6624-73-3|CAS:639-58-7|CAS:900-95-8|CAS:379-52-2	5
8	CAS:7683-59-2	CAS:99-45-6|CAS:829-74-3|CAS:452-86-8|CAS:51-43-4|CAS:51-41-2	5
9	CAS:74-31-7	CAS:76-87-9|CAS:639-58-7|CAS:101-54-2|CAS:900-95-8|CAS:379-52-2	5

## Sheet: Table S5
Table S5: List of 523 matched molecular pairs (MMPs) identified in the TSHR agonist dataset. For each MMP, the table provides the chemical identifiers, chemical SMILES (after performing canonicalization in RDKit and removing stereoisomer information) which was used then as input SMILES in mmpdb platform in order to generate MMPs, generated constant part and transformation between the chemical str…
Serial Number	First Chemical Identifier	First Chemical SMILES	Second Chemical Identifier	Second Chemical SMILES	Constant Part	Transformation	Activity Difference (ΔpAC50)	MMP-cliff
1	CAS:68052-23-3	CC(C)C(OC(=O)c1ccccc1)C(C)(C)COC(=O)c1ccccc1	CAS:6624-73-3	O=C(OCCCCCOC(=O)c1ccccc1)c1ccccc1	[*:1]OC(=O)c1ccccc1.[*:2]OC(=O)c1ccccc1	[*:1]CC(C)(C)C([*:2])C(C)C>>[*:1]CCCCC[*:2]	4.22	yes
2	CAS:51-41-2	NC[CH](O)c1ccc(O)c(O)c1	CAS:7683-59-2	CC(C)NCC(O)c1ccc(O)c(O)c1	[*:1]CC(O)c1ccc(O)c(O)c1	[*:1]N>>[*:1]NC(C)C	3.68	yes
3	CAS:51-41-2	NC[CH](O)c1ccc(O)c(O)c1	CAS:7683-59-2	CC(C)NCC(O)c1ccc(O)c(O)c1	[*:1]C(O)c1ccc(O)c(O)c1	[*:1]CN>>[*:1]CNC(C)C	3.68	yes
4	CAS:7683-59-2	CC(C)NCC(O)c1ccc(O)c(O)c1	CAS:51-41-2	NC[CH](O)c1ccc(O)c(O)c1	[*:1]NCC(O)c1ccc(O)c(O)c1	[*:1]C(C)C>>[*:1][H]	3.68	yes
5	CAS:829-74-3	C[CH](N)[CH](O)c1ccc(O)c(O)c1	CAS:7683-59-2	CC(C)NCC(O)c1ccc(O)c(O)c1	[*:3]C.[*:1]O.[*:2]c1ccc(O)c(O)c1	[*:1]C([*:2])C([*:3])N>>[*:1]C([*:2])CN[C@@H]([*:3])C	3.22	yes
6	CAS:829-74-3	C[CH](N)[CH](O)c1ccc(O)c(O)c1	CAS:7683-59-2	CC(C)NCC(O)c1ccc(O)c(O)c1	[*:3]C.[*:1]O.[*:2]c1ccc(O)c(O)c1	[*:1]C([*:2])C([*:3])N>>[*:1]C([*:2])CNC([*:3])C	3.22	yes
7	CAS:829-74-3	C[CH](N)[CH](O)c1ccc(O)c(O)c1	CAS:7683-59-2	CC(C)NCC(O)c1ccc(O)c(O)c1	[*:2]C.[*:1]C(O)c1ccc(O)c(O)c1	[*:1]C([*:2])N>>[*:1]CNC([*:2])C	3.22	yes
8	CAS:829-74-3	C[CH](N)[CH](O)c1ccc(O)c(O)c1	CAS:7683-59-2	CC(C)NCC(O)c1ccc(O)c(O)c1	[*:2]C.[*:1]C(O)c1ccc(O)c(O)c1	[*:1]C([*:2])N>>[*:1]CN[C@@H]([*:2])C	3.22	yes
9	CAS:829-74-3	C[CH](N)[CH](O)c1ccc(O)c(O)c1	CAS:7683-59-2	CC(C)NCC(O)c1ccc(O)c(O)c1	[*:2]C.[*:1]C(O)c1ccc(O)c(O)c1	[*:1]C([*:2])N>>[*:1]CN[C@H]([*:2])C	3.22	yes
10	CAS:829-74-3	C[CH](N)[CH](O)c1ccc(O)c(O)c1	CAS:7683-59-2	CC(C)NCC(O)c1ccc(O)c(O)c1	[*:1]C(O)c1ccc(O)c(O)c1	[*:1]C(C)N>>[*:1]CNC(C)C	3.22	yes
11	CAS:829-74-3	C[CH](N)[CH](O)c1ccc(O)c(O)c1	CAS:7683-59-2	CC(C)NCC(O)c1ccc(O)c(O)c1	[*:3]C.[*:1]O.[*:2]c1ccc(O)c(O)c1	[*:1]C([*:2])C([*:3])N>>[*:1]C([*:2])CN[C@H]([*:3])C	3.22	yes
12	CAS:603-36-1	c1ccc([Sb](c2ccccc2)c2ccccc2)cc1	CAS:900-95-8	CC(=O)O[Sn](c1ccccc1)(c1ccccc1)c1ccccc1	[*:1]c1ccccc1.[*:2]c1ccccc1.[*:3]c1ccccc1	[*:1][Sb]([*:2])[*:3]>>[*:1][Sn]([*:2])([*:3])OC(C)=O	2.91	yes
13	CAS:791-31-1	O[Si](c1ccccc1)(c1ccccc1)c1ccccc1	CAS:900-95-8	CC(=O)O[Sn](c1ccccc1)(c1ccccc1)c1ccccc1	[*:1]c1ccccc1.[*:2]c1ccccc1.[*:3]c1ccccc1	[*:1][Si]([*:2])([*:3])O>>[*:1][Sn]([*:2])([*:3])OC(C)=O	2.63	yes
14	CAS:603-33-8	c1ccc([Bi](c2ccccc2)c2ccccc2)cc1	CAS:900-95-8	CC(=O)O[Sn](c1ccccc1)(c1ccccc1)c1ccccc1	[*:1]c1ccccc1.[*:2]c1ccccc1.[*:3]c1ccccc1	[*:1][Bi]([*:2])[*:3]>>[*:1][Sn]([*:2])([*:3])OC(C)=O	2.61	yes
15	CAS:603-36-1	c1ccc([Sb](c2ccccc2)c2ccccc2)cc1	CAS:76-87-9	O[Sn](c1ccccc1)(c1ccccc1)c1ccccc1	[*:1]c1ccccc1.[*:2]c1ccccc1.[*:3]c1ccccc1	[*:1][Sb]([*:2])[*:3]>>[*:1][Sn]([*:2])([*:3])O	2.57	yes
16	CAS:603-36-1	c1ccc([Sb](c2ccccc2)c2ccccc2)cc1	CAS:379-52-2	F[Sn](c1ccccc1)(c1ccccc1)c1ccccc1	[*:1]c1ccccc1.[*:2]c1ccccc1.[*:3]c1ccccc1	[*:1][Sb]([*:2])[*:3]>>[*:1][Sn]([*:2])([*:3])F	2.55	yes
17	CAS:7683-59-2	CC(C)NCC(O)c1ccc(O)c(O)c1	CAS:51-43-4	CNC[CH](O)c1ccc(O)c(O)c1	[*:3]C.[*:1]O.[*:2]c1ccc(O)c(O)c1	[*:1]C([*:2])CN[C@H]([*:3])C>>[*:3]NCC([*:1])[*:2]	2.47	yes
18	CAS:51-43-4	CNC[CH](O)c1ccc(O)c(O)c1	CAS:7683-59-2	CC(C)NCC(O)c1ccc(O)c(O)c1	[*:2]C.[*:1]C(O)c1ccc(O)c(O)c1	[*:1]CN[*:2]>>[*:1]CNC([*:2])C	2.47	yes
19	CAS:51-43-4	CNC[CH](O)c1ccc(O)c(O)c1	CAS:7683-59-2	CC(C)NCC(O)c1ccc(O)c(O)c1	[*:2]C.[*:1]C(O)c1ccc(O)c(O)c1	[*:1]CN[*:2]>>[*:1]CN[C@@H]([*:2])C	2.47	yes
20	CAS:51-43-4	CNC[CH](O)c1ccc(O)c(O)c1	CAS:7683-59-2	CC(C)NCC(O)c1ccc(O)c(O)c1	[*:2]C.[*:1]CC(O)c1ccc(O)c(O)c1	[*:1]N[*:2]>>[*:1]NC([*:2])C	2.47	yes
21	CAS:51-43-4	CNC[CH](O)c1ccc(O)c(O)c1	CAS:7683-59-2	CC(C)NCC(O)c1ccc(O)c(O)c1	[*:1]CC(O)c1ccc(O)c(O)c1	[*:1]NC>>[*:1]NC(C)C	2.47	yes
22	CAS:51-43-4	CNC[CH](O)c1ccc(O)c(O)c1	CAS:7683-59-2	CC(C)NCC(O)c1ccc(O)c(O)c1	[*:2]C.[*:1]CC(O)c1ccc(O)c(O)c1	[*:1]N[*:2]>>[*:1]N[C@@H]([*:2])C	2.47	yes
23	CAS:51-43-4	CNC[CH](O)c1ccc(O)c(O)c1	CAS:7683-59-2	CC(C)NCC(O)c1ccc(O)c(O)c1	[*:2]C.[*:1]C(O)c1ccc(O)c(O)c1	[*:1]CN[*:2]>>[*:1]CN[C@H]([*:2])C	2.47	yes
24	CAS:51-43-4	CNC[CH](O)c1ccc(O)c(O)c1	CAS:7683-59-2	CC(C)NCC(O)c1ccc(O)c(O)c1	[*:2]C.[*:1]CC(O)c1ccc(O)c(O)c1	[*:1]N[*:2]>>[*:1]N[C@H]([*:2])C	2.47	yes
25	CAS:7683-59-2	CC(C)NCC(O)c1ccc(O)c(O)c1	CAS:51-43-4	CNC[CH](O)c1ccc(O)c(O)c1	[*:3]C.[*:1]O.[*:2]c1ccc(O)c(O)c1	[*:1]C([*:2])CNC([*:3])C>>[*:3]NCC([*:1])[*:2]	2.47	yes
26	CAS:7683-59-2	CC(C)NCC(O)c1ccc(O)c(O)c1	CAS:51-43-4	CNC[CH](O)c1ccc(O)c(O)c1	[*:3]C.[*:1]O.[*:2]c1ccc(O)c(O)c1	[*:1]C([*:2])CN[C@@H]([*:3])C>>[*:3]NCC([*:1])[*:2]	2.47	yes
27	CAS:51-43-4	CNC[CH](O)c1ccc(O)c(O)c1	CAS:7683-59-2	CC(C)NCC(O)c1ccc(O)c(O)c1	[*:1]NCC(O)c1ccc(O)c(O)c1	[*:1]C>>[*:1]C(C)C	2.47	yes
28	CAS:51-43-4	CNC[CH](O)c1ccc(O)c(O)c1	CAS:7683-59-2	CC(C)NCC(O)c1ccc(O)c(O)c1	[*:1]C(O)c1ccc(O)c(O)c1	[*:1]CNC>>[*:1]CNC(C)C	2.47	yes
29	CAS:603-36-1	c1ccc([Sb](c2ccccc2)c2ccccc2)cc1	CAS:639-58-7	Cl[Sn](c1ccccc1)(c1ccccc1)c1ccccc1	[*:1]c1ccccc1.[*:2]c1ccccc1.[*:3]c1ccccc1	[*:1][Sb]([*:2])[*:3]>>[*:1][Sn]([*:2])([*:3])Cl	2.37	yes
30	CAS:620-40-6	c1ccc(CN(Cc2ccccc2)Cc2ccccc2)cc1	CAS:900-95-8	CC(=O)O[Sn](c1ccccc1)(c1ccccc1)c1ccccc1	[*:1]c1ccccc1.[*:2]c1ccccc1.[*:3]c1ccccc1	[*:1]CN(C[*:2])C[*:3]>>[*:1][Sn]([*:2])([*:3])OC(C)=O	2.33	yes
31	CAS:791-31-1	O[Si](c1ccccc1)(c1ccccc1)c1ccccc1	CAS:76-87-9	O[Sn](c1ccccc1)(c1ccccc1)c1ccccc1	[*:1]c1ccccc1.[*:2]c1ccccc1.[*:3]c1ccccc1	[*:1][Si]([*:2])([*:3])O>>[*:1][Sn]([*:2])([*:3])O	2.29	yes
32	CAS:791-31-1	O[Si](c1ccccc1)(c1ccccc1)c1ccccc1	CAS:379-52-2	F[Sn](c1ccccc1)(c1ccccc1)c1ccccc1	[*:1]c1ccccc1.[*:2]c1ccccc1.[*:3]c1ccccc1	[*:1][Si]([*:2])([*:3])O>>[*:1][Sn]([*:2])([*:3])F	2.27	yes
33	CAS:603-33-8	c1ccc([Bi](c2ccccc2)c2ccccc2)cc1	CAS:76-87-9	O[Sn](c1ccccc1)(c1ccccc1)c1ccccc1	[*:1]c1ccccc1.[*:2]c1ccccc1.[*:3]c1ccccc1	[*:1][Bi]([*:2])[*:3]>>[*:1][Sn]([*:2])([*:3])O	2.26	yes
34	CAS:603-33-8	c1ccc([Bi](c2ccccc2)c2ccccc2)cc1	CAS:379-52-2	F[Sn](c1ccccc1)(c1ccccc1)c1ccccc1	[*:1]c1ccccc1.[*:2]c1ccccc1.[*:3]c1ccccc1	[*:1][Bi]([*:2])[*:3]>>[*:1][Sn]([*:2])([*:3])F	2.24	yes
35	CAS:115-86-6	O=P(Oc1ccccc1)(Oc1ccccc1)Oc1ccccc1	CAS:900-95-8	CC(=O)O[Sn](c1ccccc1)(c1ccccc1)c1ccccc1	[*:1]c1ccccc1.[*:2]c1ccccc1.[*:3]c1ccccc1	[*:1]OP(=O)(O[*:2])O[*:3]>>[*:1][Sn]([*:2])([*:3])OC(C)=O	2.11	yes
36	CAS:791-31-1	O[Si](c1ccccc1)(c1ccccc1)c1ccccc1	CAS:639-58-7	Cl[Sn](c1ccccc1)(c1ccccc1)c1ccccc1	[*:1]c1ccccc1.[*:2]c1ccccc1.[*:3]c1ccccc1	[*:1][Si]([*:2])([*:3])O>>[*:1][Sn]([*:2])([*:3])Cl	2.09	yes
37	CAS:74-31-7	c1ccc(Nc2ccc(Nc3ccccc3)cc2)cc1	CAS:101-54-2	Nc1ccc(Nc2ccccc2)cc1	[*:1]Nc1ccc(Nc2ccccc2)cc1	[*:1]c1ccccc1>>[*:1][H]	2.09	yes
38	CAS:603-33-8	c1ccc([Bi](c2ccccc2)c2ccccc2)cc1	CAS:639-58-7	Cl[Sn](c1ccccc1)(c1ccccc1)c1ccccc1	[*:1]c1ccccc1.[*:2]c1ccccc1.[*:3]c1ccccc1	[*:1][Bi]([*:2])[*:3]>>[*:1][Sn]([*:2])([*:3])Cl	2.07	yes
39	CAS:620-40-6	c1ccc(CN(Cc2ccccc2)Cc2ccccc2)cc1	CAS:76-87-9	O[Sn](c1ccccc1)(c1ccccc1)c1ccccc1	[*:1]c1ccccc1.[*:2]c1ccccc1.[*:3]c1ccccc1	[*:1]CN(C[*:2])C[*:3]>>[*:1][Sn]([*:2])([*:3])O	1.98	no
40	CAS:620-40-6	c1ccc(CN(Cc2ccccc2)Cc2ccccc2)cc1	CAS:379-52-2	F[Sn](c1ccccc1)(c1ccccc1)c1ccccc1	[*:1]c1ccccc1.[*:2]c1ccccc1.[*:3]c1ccccc1	[*:1]CN(C[*:2])C[*:3]>>[*:1][Sn]([*:2])([*:3])F	1.96	no
41	CAS:620-40-6	c1ccc(CN(Cc2ccccc2)Cc2ccccc2)cc1	CAS:639-58-7	Cl[Sn](c1ccccc1)(c1ccccc1)c1ccccc1	[*:1]c1ccccc1.[*:2]c1ccccc1.[*:3]c1ccccc1	[*:1]CN(C[*:2])C[*:3]>>[*:1][Sn]([*:2])([*:3])Cl	1.79	no
42	CAS:115-86-6	O=P(Oc1ccccc1)(Oc1ccccc1)Oc1ccccc1	CAS:76-87-9	O[Sn](c1ccccc1)(c1ccccc1)c1ccccc1	[*:1]c1ccccc1.[*:2]c1ccccc1.[*:3]c1ccccc1	[*:1]OP(=O)(O[*:2])O[*:3]>>[*:1][Sn]([*:2])([*:3])O	1.77	no
43	CAS:115-86-6	O=P(Oc1ccccc1)(Oc1ccccc1)Oc1ccccc1	CAS:379-52-2	F[Sn](c1ccccc1)(c1ccccc1)c1ccccc1	[*:1]c1ccccc1.[*:2]c1ccccc1.[*:3]c1ccccc1	[*:1]OP(=O)(O[*:2])O[*:3]>>[*:1][Sn]([*:2])([*:3])F	1.75	no
44	CAS:1162-06-7	CC(=O)O[Pb](c1ccccc1)(c1ccccc1)c1ccccc1	CAS:900-95-8	CC(=O)O[Sn](c1ccccc1)(c1ccccc1)c1ccccc1	[*:1]c1ccccc1.[*:2]c1ccccc1.[*:3]c1ccccc1	[*:1][Pb]([*:2])([*:3])OC(C)=O>>[*:1][Sn]([*:2])([*:3])OC(C)=O	1.6	no
45	CAS:115-86-6	O=P(Oc1ccccc1)(Oc1ccccc1)Oc1ccccc1	CAS:639-58-7	Cl[Sn](c1ccccc1)(c1ccccc1)c1ccccc1	[*:1]c1ccccc1.[*:2]c1ccccc1.[*:3]c1ccccc1	[*:1]OP(=O)(O[*:2])O[*:3]>>[*:1][Sn]([*:2])([*:3])Cl	1.57	no
46	CAS:594-30-9	Cl[Bi](Cl)(c1ccccc1)(c1ccccc1)c1ccccc1	CAS:900-95-8	CC(=O)O[Sn](c1ccccc1)(c1ccccc1)c1ccccc1	[*:1]c1ccccc1.[*:2]c1ccccc1.[*:3]c1ccccc1	[*:1][Bi]([*:2])([*:3])(Cl)Cl>>[*:1][Sn]([*:2])([*:3])OC(C)=O	1.49	no
47	CAS:101-72-4	CC(C)Nc1ccc(Nc2ccccc2)cc1	CAS:101-54-2	Nc1ccc(Nc2ccccc2)cc1	[*:1]Nc1ccc(Nc2ccccc2)cc1	[*:1]C(C)C>>[*:1][H]	1.47	no
48	CAS:101-54-2	Nc1ccc(Nc2ccccc2)cc1	CAS:101-72-4	CC(C)Nc1ccc(Nc2ccccc2)cc1	[*:1]c1ccc(Nc2ccccc2)cc1	[*:1]N>>[*:1]NC(C)C	1.47	no
49	CAS:594-30-9	Cl[Bi](Cl)(c1ccccc1)(c1ccccc1)c1ccccc1	CAS:603-36-1	c1ccc([Sb](c2ccccc2)c2ccccc2)cc1	[*:1]c1ccccc1.[*:2]c1ccccc1.[*:3]c1ccccc1	[*:1][Bi]([*:2])([*:3])(Cl)Cl>>[*:1][Sb]([*:2])[*:3]	1.42	no
50	CAS:115344-47-3	CN/C(=N\c1ccc(C2=NNC(=O)CC2C)cc1)NC#N	CAS:141505-33-1	C[CH]1CC(=O)NN=C1c1ccc(NN=C(C#N)C#N)cc1	[*:1]c1ccc(C2=NNC(=O)CC2C)cc1	[*:1]/N=C(\NC)NC#N>>[*:1]NN=C(C#N)C#N	1.33	no
51	CAS:1162-06-7	CC(=O)O[Pb](c1ccccc1)(c1ccccc1)c1ccccc1	CAS:603-36-1	c1ccc([Sb](c2ccccc2)c2ccccc2)cc1	[*:1]c1ccccc1.[*:2]c1ccccc1.[*:3]c1ccccc1	[*:1][Pb]([*:2])([*:3])OC(C)=O>>[*:1][Sb]([*:2])[*:3]	1.31	no
52	CAS:1162-06-7	CC(=O)O[Pb](c1ccccc1)(c1ccccc1)c1ccccc1	CAS:76-87-9	O[Sn](c1ccccc1)(c1ccccc1)c1ccccc1	[*:1]c1ccccc1.[*:2]c1ccccc1.[*:3]c1ccccc1	[*:1][Pb]([*:2])([*:3])OC(C)=O>>[*:1][Sn]([*:2])([*:3])O	1.26	no
53	CAS:1162-06-7	CC(=O)O[Pb](c1ccccc1)(c1ccccc1)c1ccccc1	CAS:379-52-2	F[Sn](c1ccccc1)(c1ccccc1)c1ccccc1	[*:1]c1ccccc1.[*:2]c1ccccc1.[*:3]c1ccccc1	[*:1][Pb]([*:2])([*:3])OC(C)=O>>[*:1][Sn]([*:2])([*:3])F	1.23	no
54	CAS:51-41-2	NC[CH](O)c1ccc(O)c(O)c1	CAS:51-43-4	CNC[CH](O)c1ccc(O)c(O)c1	[*:1]CC(O)c1ccc(O)c(O)c1	[*:1]N>>[*:1]NC	1.21	no
55	CAS:51-41-2	NC[CH](O)c1ccc(O)c(O)c1	CAS:51-43-4	CNC[CH](O)c1ccc(O)c(O)c1	[*:1]O.[*:2]c1ccc(O)c(O)c1	[*:1]C([*:2])CN>>[*:1]C([*:2])CNC	1.21	no
56	CAS:51-43-4	CNC[CH](O)c1ccc(O)c(O)c1	CAS:51-41-2	NC[CH](O)c1ccc(O)c(O)c1	[*:1]NCC(O)c1ccc(O)c(O)c1	[*:1]C>>[*:1][H]	1.21	no
57	CAS:51-41-2	NC[CH](O)c1ccc(O)c(O)c1	CAS:51-43-4	CNC[CH](O)c1ccc(O)c(O)c1	[*:1]C(O)c1ccc(O)c(O)c1	[*:1]CN>>[*:1]CNC	1.21	no
58	CAS:594-30-9	Cl[Bi](Cl)(c1ccccc1)(c1ccccc1)c1ccccc1	CAS:76-87-9	O[Sn](c1ccccc1)(c1ccccc1)c1ccccc1	[*:1]c1ccccc1.[*:2]c1ccccc1.[*:3]c1ccccc1	[*:1][Bi]([*:2])([*:3])(Cl)Cl>>[*:1][Sn]([*:2])([*:3])O	1.15	no
59	CAS:594-30-9	Cl[Bi](Cl)(c1ccccc1)(c1ccccc1)c1ccccc1	CAS:791-31-1	O[Si](c1ccccc1)(c1ccccc1)c1ccccc1	[*:1]c1ccccc1.[*:2]c1ccccc1.[*:3]c1ccccc1	[*:1][Bi]([*:2])([*:3])(Cl)Cl>>[*:1][Si]([*:2])([*:3])O	1.14	no
60	CAS:594-30-9	Cl[Bi](Cl)(c1ccccc1)(c1ccccc1)c1ccccc1	CAS:379-52-2	F[Sn](c1ccccc1)(c1ccccc1)c1ccccc1	[*:1]c1ccccc1.[*:2]c1ccccc1.[*:3]c1ccccc1	[*:1][Bi]([*:2])([*:3])(Cl)Cl>>[*:1][Sn]([*:2])([*:3])F	1.12	no
61	CAS:594-30-9	Cl[Bi](Cl)(c1ccccc1)(c1ccccc1)c1ccccc1	CAS:603-33-8	c1ccc([Bi](c2ccccc2)c2ccccc2)cc1	[*:1]c1ccccc1.[*:2]c1ccccc1.[*:3]c1ccccc1	[*:1][Bi]([*:2])([*:3])(Cl)Cl>>[*:1][Bi]([*:2])[*:3]	1.12	no
62	CAS:302-79-4	CC1=C(/C=C/C(C)=C/C=C/C(C)=C/C(=O)O)C(C)(C)CCC1	CAS:116-31-4	CC1=C(/C=C/C(C)=C/C=C/C(C)=C/C=O)C(C)(C)CCC1	[*:1]/C=C/C=C(C)/C=C/C1=C(C)CCCC1(C)C.[*:2]C	[*:1]C([*:2])=CC(=O)O>>[*:1]C([*:2])=CC=O	1.11	no
63	CAS:302-79-4	CC1=C(/C=C/C(C)=C/C=C/C(C)=C/C(=O)O)C(C)(C)CCC1	CAS:116-31-4	CC1=C(/C=C/C(C)=C/C=C/C(C)=C/C=O)C(C)(C)CCC1	[*:1]/C=C(C)/C=C/C1=C(C)CCCC1(C)C.[*:2]C	[*:1]/C=C\C([*:2])=C\C(=O)O>>[*:1]/C=C\C([*:2])=C\C=O	1.11	no
64	CAS:302-79-4	CC1=C(/C=C/C(C)=C/C=C/C(C)=C/C(=O)O)C(C)(C)CCC1	CAS:116-31-4	CC1=C(/C=C/C(C)=C/C=C/C(C)=C/C=O)C(C)(C)CCC1	[*:1]/C=C/C=C(C)/C=C/C1=C(C)CCCC1(C)C	[*:1]/C(C)=C\C(=O)O>>[*:1]/C(C)=C\C=O	1.11	no
65	CAS:302-79-4	CC1=C(/C=C/C(C)=C/C=C/C(C)=C/C(=O)O)C(C)(C)CCC1	CAS:116-31-4	CC1=C(/C=C/C(C)=C/C=C/C(C)=C/C=O)C(C)(C)CCC1	[*:1]/C=C(C)/C=C/C=C(C)/C=C/C1=C(C)CCCC1(C)C	[*:1]C(=O)O>>[*:1]C=O	1.11	no
66	CAS:1162-06-7	CC(=O)O[Pb](c1ccccc1)(c1ccccc1)c1ccccc1	CAS:639-58-7	Cl[Sn](c1ccccc1)(c1ccccc1)c1ccccc1	[*:1]c1ccccc1.[*:2]c1ccccc1.[*:3]c1ccccc1	[*:1][Pb]([*:2])([*:3])OC(C)=O>>[*:1][Sn]([*:2])([*:3])Cl	1.06	no
67	CAS:4726-14-1	CCCN(CCC)c1c([N+](=O)[O-])cc(S(C)(=O)=O)cc1[N+](=O)[O-]	CAS:19044-88-3	CCCN(CCC)c1c([N+](=O)[O-])cc(S(N)(=O)=O)cc1[N+](=O)[O-]	[*:1]c1cc([N+](=O)[O-])c(N(CCC)CCC)c([N+](=O)[O-])c1	[*:1]S(C)(=O)=O>>[*:1]S(N)(=O)=O	1.04	no
68	CAS:1162-06-7	CC(=O)O[Pb](c1ccccc1)(c1ccccc1)c1ccccc1	CAS:791-31-1	O[Si](c1ccccc1)(c1ccccc1)c1ccccc1	[*:1]c1ccccc1.[*:2]c1ccccc1.[*:3]c1ccccc1	[*:1][Pb]([*:2])([*:3])OC(C)=O>>[*:1][Si]([*:2])([*:3])O	1.03	no
69	CAS:603-33-8	c1ccc([Bi](c2ccccc2)c2ccccc2)cc1	CAS:1162-06-7	CC(=O)O[Pb](c1ccccc1)(c1ccccc1)c1ccccc1	[*:1]c1ccccc1.[*:2]c1ccccc1.[*:3]c1ccccc1	[*:1][Bi]([*:2])[*:3]>>[*:1][Pb]([*:2])([*:3])OC(C)=O	1.01	no
70	CAS:81-14-1	CC(=O)c1c(C)c([N+](=O)[O-])c(C(C)(C)C)c([N+](=O)[O-])c1C	CAS:81-15-2	Cc1c([N+](=O)[O-])c(C)c([N+](=O)[O-])c(C(C)(C)C)c1[N+](=O)[O-]	[*:1]c1c(C)c([N+](=O)[O-])c(C(C)(C)C)c([N+](=O)[O-])c1C	[*:1]C(C)=O>>[*:1][N+](=O)[O-]	1	no
71	CAS:5153-67-3	O=[N+]([O-])/C=C/c1ccccc1	CAS:705-60-2	CC(=Cc1ccccc1)[N+](=O)[O-]	[*:2][N+](=O)[O-].[*:1]c1ccccc1	[*:1]/C=C\[*:2]>>[*:1]C=C([*:2])C	1	no
72	CAS:2081-08-5	CC(c1ccc(O)cc1)c1ccc(O)cc1	CAS:6898-97-1	CCC(=C(CC)c1ccc(O)cc1)c1ccc(O)cc1	[*:1]c1ccc(O)cc1.[*:2]c1ccc(O)cc1	[*:1]C([*:2])C>>[*:1]C(CC)=C([*:2])CC	0.97	no
73	CAS:594-30-9	Cl[Bi](Cl)(c1ccccc1)(c1ccccc1)c1ccccc1	CAS:639-58-7	Cl[Sn](c1ccccc1)(c1ccccc1)c1ccccc1	[*:1]c1ccccc1.[*:2]c1ccccc1.[*:3]c1ccccc1	[*:1][Bi]([*:2])([*:3])(Cl)Cl>>[*:1][Sn]([*:2])([*:3])Cl	0.95	no
74	CAS:145-39-1	Cc1c(C)c([N+](=O)[O-])c(C(C)(C)C)c([N+](=O)[O-])c1C	CAS:81-14-1	CC(=O)c1c(C)c([N+](=O)[O-])c(C(C)(C)C)c([N+](=O)[O-])c1C	[*:1]c1c(C)c([N+](=O)[O-])c(C(C)(C)C)c([N+](=O)[O-])c1C	[*:1]C>>[*:1]C(C)=O	0.89	no
75	CAS:17540-75-9	CCC(C)c1cc(C(C)(C)C)c(O)c(C(C)(C)C)c1	CAS:1620-98-0	CC(C)(C)c1cc(C=O)cc(C(C)(C)C)c1O	[*:1]c1cc(C(C)(C)C)c(O)c(C(C)(C)C)c1	[*:1]C(C)CC>>[*:1]C=O	0.88	no
76	CAS:620-40-6	c1ccc(CN(Cc2ccccc2)Cc2ccccc2)cc1	CAS:594-30-9	Cl[Bi](Cl)(c1ccccc1)(c1ccccc1)c1ccccc1	[*:1]c1ccccc1.[*:2]c1ccccc1.[*:3]c1ccccc1	[*:1]CN(C[*:2])C[*:3]>>[*:1][Bi]([*:2])([*:3])(Cl)Cl	0.84	no
77	CAS:302-79-4	CC1=C(/C=C/C(C)=C/C=C/C(C)=C/C(=O)O)C(C)(C)CCC1	CAS:472-86-6	CC1=C(/C=C/C(C)=C/C=C/C(C)=C\C=O)C(C)(C)CCC1	[*:1]/C=C/C=C(C)/C=C/C1=C(C)CCCC1(C)C.[*:2]C	[*:1]C([*:2])=CC(=O)O>>[*:1]C([*:2])=CC=O	0.82	no
78	CAS:472-86-6	CC1=C(/C=C/C(C)=C/C=C/C(C)=C\C=O)C(C)(C)CCC1	CAS:302-79-4	CC1=C(/C=C/C(C)=C/C=C/C(C)=C/C(=O)O)C(C)(C)CCC1	[*:1]/C=C/C=C(C)/C=C/C1=C(C)CCCC1(C)C	[*:1]/C(C)=C/C=O>>[*:1]/C(C)=C\C(=O)O	0.82	no
79	CAS:472-86-6	CC1=C(/C=C/C(C)=C/C=C/C(C)=C\C=O)C(C)(C)CCC1	CAS:302-79-4	CC1=C(/C=C/C(C)=C/C=C/C(C)=C/C(=O)O)C(C)(C)CCC1	[*:1]/C=C(C)/C=C/C1=C(C)CCCC1(C)C.[*:2]C	[*:1]/C=C\C([*:2])=C/C=O>>[*:1]/C=C\C([*:2])=C\C(=O)O	0.82	no
80	CAS:4759-48-2	CC1=C(/C=C/C(C)=C/C=C/C(C)=C\C(=O)O)C(C)(C)CCC1	CAS:302-79-4	CC1=C(/C=C/C(C)=C/C=C/C(C)=C/C(=O)O)C(C)(C)CCC1	[*:1]/C=C(C)/C=C/C1=C(C)CCCC1(C)C.[*:2]C.[*:3]C(=O)O	[*:1]/C=C\C([*:2])=C/[*:3]>>[*:1]/C=C\C([*:2])=C\[*:3]	0.81	no
81	CAS:4759-48-2	CC1=C(/C=C/C(C)=C/C=C/C(C)=C\C(=O)O)C(C)(C)CCC1	CAS:302-79-4	CC1=C(/C=C/C(C)=C/C=C/C(C)=C/C(=O)O)C(C)(C)CCC1	[*:1]/C=C(C)/C=C/C1=C(C)CCCC1(C)C.[*:2]C	[*:1]/C=C\C([*:2])=C/C(=O)O>>[*:1]/C=C\C([*:2])=C\C(=O)O	0.81	no
82	CAS:302-79-4	CC1=C(/C=C/C(C)=C/C=C/C(C)=C/C(=O)O)C(C)(C)CCC1	CAS:4759-48-2	CC1=C(/C=C/C(C)=C/C=C/C(C)=C\C(=O)O)C(C)(C)CCC1	[*:3]/C=C/C1=C(C)CCCC1(C)C.[*:2]C.[*:1]C(=O)O	[*:1]/C=C([*:2])/C=C/C=C(\[*:3])C>>[*:1]/C=C([*:2])\C=C\C=C(/[*:3])C	0.81	no
83	CAS:4759-48-2	CC1=C(/C=C/C(C)=C/C=C/C(C)=C\C(=O)O)C(C)(C)CCC1	CAS:302-79-4	CC1=C(/C=C/C(C)=C/C=C/C(C)=C/C(=O)O)C(C)(C)CCC1	[*:1]/C=C/C=C(C)/C=C/C1=C(C)CCCC1(C)C	[*:1]/C(C)=C/C(=O)O>>[*:1]/C(C)=C\C(=O)O	0.81	no
84	CAS:4759-48-2	CC1=C(/C=C/C(C)=C/C=C/C(C)=C\C(=O)O)C(C)(C)CCC1	CAS:302-79-4	CC1=C(/C=C/C(C)=C/C=C/C(C)=C/C(=O)O)C(C)(C)CCC1	[*:1]/C=C(C)/C=C/C1=C(C)CCCC1(C)C.[*:2]C(=O)O	[*:1]/C=C\C(C)=C/[*:2]>>[*:1]/C=C\C(C)=C\[*:2]	0.81	no
85	CAS:4759-48-2	CC1=C(/C=C/C(C)=C/C=C/C(C)=C\C(=O)O)C(C)(C)CCC1	CAS:302-79-4	CC1=C(/C=C/C(C)=C/C=C/C(C)=C/C(=O)O)C(C)(C)CCC1	[*:3]/C=C/C1=C(C)CCCC1(C)C.[*:2]C.[*:1]C(=O)O	[*:1]/C=C([*:2])\C=C\C=C(/[*:3])C>>[*:1]/C=C(C)/C=C/C=C([*:2])[*:3]	0.81	no
86	CAS:4759-48-2	CC1=C(/C=C/C(C)=C/C=C/C(C)=C\C(=O)O)C(C)(C)CCC1	CAS:302-79-4	CC1=C(/C=C/C(C)=C/C=C/C(C)=C/C(=O)O)C(C)(C)CCC1	[*:2]/C=C/C=C(C)/C=C/C1=C(C)CCCC1(C)C.[*:1]C(=O)O	[*:1]/C=C(/[*:2])C>>[*:1]/C=C(\[*:2])C	0.81	no
87	CAS:302-79-4	CC1=C(/C=C/C(C)=C/C=C/C(C)=C/C(=O)O)C(C)(C)CCC1	CAS:4759-48-2	CC1=C(/C=C/C(C)=C/C=C/C(C)=C\C(=O)O)C(C)(C)CCC1	[*:2]/C=C/C1=C(C)CCCC1(C)C.[*:3]C.[*:1]C(=O)O	[*:1]/C=C(C)/C=C/C=C([*:2])[*:3]>>[*:1]/C=C(C)\C=C\C=C([*:2])[*:3]	0.81	no
88	CAS:302-79-4	CC1=C(/C=C/C(C)=C/C=C/C(C)=C/C(=O)O)C(C)(C)CCC1	CAS:4759-48-2	CC1=C(/C=C/C(C)=C/C=C/C(C)=C\C(=O)O)C(C)(C)CCC1	[*:3]/C=C/C1=C(C)CCCC1(C)C.[*:2]C.[*:1]C(=O)O	[*:1]/C=C([*:2])/C=C/C=C(\[*:3])C>>[*:1]/C=C(C)\C=C\C=C([*:2])[*:3]	0.81	no
89	CAS:116-31-4	CC1=C(/C=C/C(C)=C/C=C/C(C)=C/C=O)C(C)(C)CCC1	CAS:68-26-8	CC1=C(/C=C/C(C)=C/C=C/C(C)=C/CO)C(C)(C)CCC1	[*:1]/C=C/C=C(C)/C=C/C1=C(C)CCCC1(C)C.[*:2]C	[*:1]C([*:2])=CC=O>>[*:1]C([*:2])=CCO	0.81	no
90	CAS:116-31-4	CC1=C(/C=C/C(C)=C/C=C/C(C)=C/C=O)C(C)(C)CCC1	CAS:68-26-8	CC1=C(/C=C/C(C)=C/C=C/C(C)=C/CO)C(C)(C)CCC1	[*:1]/C=C(C)/C=C/C=C(C)/C=C/C1=C(C)CCCC1(C)C	[*:1]C=O>>[*:1]CO	0.81	no
91	CAS:116-31-4	CC1=C(/C=C/C(C)=C/C=C/C(C)=C/C=O)C(C)(C)CCC1	CAS:68-26-8	CC1=C(/C=C/C(C)=C/C=C/C(C)=C/CO)C(C)(C)CCC1	[*:1]/C=C(C)/C=C/C1=C(C)CCCC1(C)C	[*:1]/C=C\C(C)=C\C=O>>[*:1]/C=C\C(C)=C\CO	0.81	no
92	CAS:116-31-4	CC1=C(/C=C/C(C)=C/C=C/C(C)=C/C=O)C(C)(C)CCC1	CAS:68-26-8	CC1=C(/C=C/C(C)=C/C=C/C(C)=C/CO)C(C)(C)CCC1	[*:1]/C=C/C=C(C)/C=C/C1=C(C)CCCC1(C)C	[*:1]/C(C)=C\C=O>>[*:1]/C(C)=C\CO	0.81	no
93	CAS:116-31-4	CC1=C(/C=C/C(C)=C/C=C/C(C)=C/C=O)C(C)(C)CCC1	CAS:68-26-8	CC1=C(/C=C/C(C)=C/C=C/C(C)=C/CO)C(C)(C)CCC1	[*:1]/C=C(C)/C=C/C1=C(C)CCCC1(C)C.[*:2]C	[*:1]/C=C\C([*:2])=C\C=O>>[*:1]/C=C\C([*:2])=C\CO	0.81	no
94	CAS:115-86-6	O=P(Oc1ccccc1)(Oc1ccccc1)Oc1ccccc1	CAS:603-36-1	c1ccc([Sb](c2ccccc2)c2ccccc2)cc1	[*:1]c1ccccc1.[*:2]c1ccccc1.[*:3]c1ccccc1	[*:1]OP(=O)(O[*:2])O[*:3]>>[*:1][Sb]([*:2])[*:3]	0.8	no
95	CAS:1942-71-8	CC(C)(C)c1ccc(OC2CCCCC2O)cc1	CAS:2312-35-8	C#CCOS(=O)OC1CCCCC1Oc1ccc(C(C)(C)C)cc1	[*:1]C1CCCCC1Oc1ccc(C(C)(C)C)cc1	[*:1]O>>[*:1]OS(=O)OCC#C	0.79	no
96	CAS:829-74-3	C[CH](N)[CH](O)c1ccc(O)c(O)c1	CAS:99-45-6	CNCC(=O)c1ccc(O)c(O)c1	[*:1]C.[*:2]c1ccc(O)c(O)c1	[*:1]C(N)C([*:2])O>>[*:1]NCC([*:2])=O	0.79	no
97	CAS:122-78-1	O=CCc1ccccc1	CAS:100-56-1	Cl[Hg]c1ccccc1	[*:1]c1ccccc1	[*:1]CC=O>>[*:1][Hg]Cl	0.78	no
98	CAS:101-54-2	Nc1ccc(Nc2ccccc2)cc1	CAS:156-10-5	O=Nc1ccc(Nc2ccccc2)cc1	[*:1]c1ccc(Nc2ccccc2)cc1	[*:1]N>>[*:1]N=O	0.78	no
99	CAS:128-37-0	Cc1cc(C(C)(C)C)c(O)c(C(C)(C)C)c1	CAS:1620-98-0	CC(C)(C)c1cc(C=O)cc(C(C)(C)C)c1O	[*:1]c1cc(C(C)(C)C)c(O)c(C(C)(C)C)c1	[*:1]C>>[*:1]C=O	0.76	no
100	CAS:2081-08-5	CC(c1ccc(O)cc1)c1ccc(O)cc1	CAS:6807-17-6	CC(C)CC(C)(c1ccc(O)cc1)c1ccc(O)cc1	[*:1]C.[*:2]c1ccc(O)cc1.[*:3]c1ccc(O)cc1	[*:1]C([*:2])[*:3]>>[*:1][C@@H](C)CC([*:2])([*:3])C	0.75	no
101	CAS:2081-08-5	CC(c1ccc(O)cc1)c1ccc(O)cc1	CAS:6807-17-6	CC(C)CC(C)(c1ccc(O)cc1)c1ccc(O)cc1	[*:1]C.[*:2]c1ccc(O)cc1.[*:3]c1ccc(O)cc1	[*:1]C([*:2])[*:3]>>[*:1][C@H](C)CC([*:2])([*:3])C	0.75	no
102	CAS:2081-08-5	CC(c1ccc(O)cc1)c1ccc(O)cc1	CAS:6807-17-6	CC(C)CC(C)(c1ccc(O)cc1)c1ccc(O)cc1	[*:1]C.[*:2]c1ccc(O)cc1.[*:3]c1ccc(O)cc1	[*:1]C([*:2])[*:3]>>[*:1]C(C)CC([*:2])([*:3])C	0.75	no
103	CAS:6807-17-6	CC(C)CC(C)(c1ccc(O)cc1)c1ccc(O)cc1	CAS:2081-08-5	CC(c1ccc(O)cc1)c1ccc(O)cc1	[*:1]C.[*:2]c1ccc(O)cc1.[*:3]c1ccc(O)cc1	[*:1]C([*:2])([*:3])CC(C)C>>[*:1]C([*:2])[*:3]	0.75	no
104	CAS:6807-17-6	CC(C)CC(C)(c1ccc(O)cc1)c1ccc(O)cc1	CAS:2081-08-5	CC(c1ccc(O)cc1)c1ccc(O)cc1	[*:1]c1ccc(O)cc1.[*:2]c1ccc(O)cc1	[*:1]C([*:2])(C)CC(C)C>>[*:1]C([*:2])C	0.75	no
105	CAS:6807-17-6	CC(C)CC(C)(c1ccc(O)cc1)c1ccc(O)cc1	CAS:2081-08-5	CC(c1ccc(O)cc1)c1ccc(O)cc1	[*:1]C(C)(c1ccc(O)cc1)c1ccc(O)cc1	[*:1]CC(C)C>>[*:1][H]	0.75	no
106	CAS:829-74-3	C[CH](N)[CH](O)c1ccc(O)c(O)c1	CAS:51-43-4	CNC[CH](O)c1ccc(O)c(O)c1	[*:1]O.[*:2]c1ccc(O)c(O)c1	[*:1]C([*:2])C(C)N>>[*:1]C([*:2])CNC	0.75	no
107	CAS:829-74-3	C[CH](N)[CH](O)c1ccc(O)c(O)c1	CAS:51-43-4	CNC[CH](O)c1ccc(O)c(O)c1	[*:3]C.[*:1]O.[*:2]c1ccc(O)c(O)c1	[*:1]C([*:2])C([*:3])N>>[*:3]NCC([*:1])[*:2]	0.75	no
108	CAS:829-74-3	C[CH](N)[CH](O)c1ccc(O)c(O)c1	CAS:51-43-4	CNC[CH](O)c1ccc(O)c(O)c1	[*:1]C(O)c1ccc(O)c(O)c1	[*:1]C(C)N>>[*:1]CNC	0.75	no
109	CAS:829-74-3	C[CH](N)[CH](O)c1ccc(O)c(O)c1	CAS:51-43-4	CNC[CH](O)c1ccc(O)c(O)c1	[*:1]C.[*:2]c1ccc(O)c(O)c1	[*:1]C(N)C([*:2])O>>[*:1]NCC([*:2])O	0.75	no
110	CAS:829-74-3	C[CH](N)[CH](O)c1ccc(O)c(O)c1	CAS:51-43-4	CNC[CH](O)c1ccc(O)c(O)c1	[*:2]C.[*:1]C(O)c1ccc(O)c(O)c1	[*:1]C([*:2])N>>[*:1]CN[*:2]	0.75	no
111	CAS:86780-90-7	COC(=O)C1=C(C)NC(C)=C(C(=O)OCC(C)=O)C1c1ccccc1[N+](=O)[O-]	CAS:63675-72-9	COC(=O)C1=C(C)NC(C)=C(C(=O)OCC(C)C)C1c1ccccc1[N+](=O)[O-]	[*:1]C.[*:2]C1=C(C)NC(C)=C(C(=O)OC)C1c1ccccc1[N+](=O)[O-]	[*:1]C(=O)COC([*:2])=O>>[*:2]C(=O)OC[C@@H]([*:1])C	0.73	no
112	CAS:86780-90-7	COC(=O)C1=C(C)NC(C)=C(C(=O)OCC(C)=O)C1c1ccccc1[N+](=O)[O-]	CAS:63675-72-9	COC(=O)C1=C(C)NC(C)=C(C(=O)OCC(C)C)C1c1ccccc1[N+](=O)[O-]	[*:1]C.[*:2]COC(=O)C1=C(C)NC(C)=C(C(=O)OC)C1c1ccccc1[N+](=O)[O-]	[*:1]C([*:2])=O>>[*:1]C([*:2])C	0.73	no
113	CAS:86780-90-7	COC(=O)C1=C(C)NC(C)=C(C(=O)OCC(C)=O)C1c1ccccc1[N+](=O)[O-]	CAS:63675-72-9	COC(=O)C1=C(C)NC(C)=C(C(=O)OCC(C)C)C1c1ccccc1[N+](=O)[O-]	[*:1]C1=C(C)NC(C)=C(C(=O)OC)C1c1ccccc1[N+](=O)[O-]	[*:1]C(=O)OCC(C)=O>>[*:1]C(=O)OCC(C)C	0.73	no
114	CAS:86780-90-7	COC(=O)C1=C(C)NC(C)=C(C(=O)OCC(C)=O)C1c1ccccc1[N+](=O)[O-]	CAS:63675-72-9	COC(=O)C1=C(C)NC(C)=C(C(=O)OCC(C)C)C1c1ccccc1[N+](=O)[O-]	[*:1]C.[*:2]C1=C(C)NC(C)=C(C(=O)OC)C1c1ccccc1[N+](=O)[O-]	[*:1]C(=O)COC([*:2])=O>>[*:2]C(=O)OCC([*:1])C	0.73	no
115	CAS:86780-90-7	COC(=O)C1=C(C)NC(C)=C(C(=O)OCC(C)=O)C1c1ccccc1[N+](=O)[O-]	CAS:63675-72-9	COC(=O)C1=C(C)NC(C)=C(C(=O)OCC(C)C)C1c1ccccc1[N+](=O)[O-]	[*:1]OC(=O)C1=C(C)NC(C)=C(C(=O)OC)C1c1ccccc1[N+](=O)[O-]	[*:1]CC(C)=O>>[*:1]CC(C)C	0.73	no
116	CAS:86780-90-7	COC(=O)C1=C(C)NC(C)=C(C(=O)OCC(C)=O)C1c1ccccc1[N+](=O)[O-]	CAS:63675-72-9	COC(=O)C1=C(C)NC(C)=C(C(=O)OCC(C)C)C1c1ccccc1[N+](=O)[O-]	[*:1]C.[*:2]C1=C(C)NC(C)=C(C(=O)OC)C1c1ccccc1[N+](=O)[O-]	[*:1]C(=O)COC([*:2])=O>>[*:2]C(=O)OC[C@H]([*:1])C	0.73	no
117	CAS:86780-90-7	COC(=O)C1=C(C)NC(C)=C(C(=O)OCC(C)=O)C1c1ccccc1[N+](=O)[O-]	CAS:63675-72-9	COC(=O)C1=C(C)NC(C)=C(C(=O)OCC(C)C)C1c1ccccc1[N+](=O)[O-]	[*:2]C.[*:1]OC(=O)C1=C(C)NC(C)=C(C(=O)OC)C1c1ccccc1[N+](=O)[O-]	[*:1]CC([*:2])=O>>[*:1]CC([*:2])C	0.73	no
118	CAS:86780-90-7	COC(=O)C1=C(C)NC(C)=C(C(=O)OCC(C)=O)C1c1ccccc1[N+](=O)[O-]	CAS:63675-72-9	COC(=O)C1=C(C)NC(C)=C(C(=O)OCC(C)C)C1c1ccccc1[N+](=O)[O-]	[*:2]C.[*:1]OC(=O)C1=C(C)NC(C)=C(C(=O)OC)C1c1ccccc1[N+](=O)[O-]	[*:1]CC([*:2])=O>>[*:1]C[C@@H]([*:2])C	0.73	no
119	CAS:86780-90-7	COC(=O)C1=C(C)NC(C)=C(C(=O)OCC(C)=O)C1c1ccccc1[N+](=O)[O-]	CAS:63675-72-9	COC(=O)C1=C(C)NC(C)=C(C(=O)OCC(C)C)C1c1ccccc1[N+](=O)[O-]	[*:2]C.[*:1]OC(=O)C1=C(C)NC(C)=C(C(=O)OC)C1c1ccccc1[N+](=O)[O-]	[*:1]CC([*:2])=O>>[*:1]C[C@H]([*:2])C	0.73	no
120	CAS:86780-90-7	COC(=O)C1=C(C)NC(C)=C(C(=O)OCC(C)=O)C1c1ccccc1[N+](=O)[O-]	CAS:63675-72-9	COC(=O)C1=C(C)NC(C)=C(C(=O)OCC(C)C)C1c1ccccc1[N+](=O)[O-]	[*:1]COC(=O)C1=C(C)NC(C)=C(C(=O)OC)C1c1ccccc1[N+](=O)[O-]	[*:1]C(C)=O>>[*:1]C(C)C	0.73	no
121	CAS:620-40-6	c1ccc(CN(Cc2ccccc2)Cc2ccccc2)cc1	CAS:1162-06-7	CC(=O)O[Pb](c1ccccc1)(c1ccccc1)c1ccccc1	[*:1]c1ccccc1.[*:2]c1ccccc1.[*:3]c1ccccc1	[*:1]CN(C[*:2])C[*:3]>>[*:1][Pb]([*:2])([*:3])OC(C)=O	0.73	no
122	CAS:73573-42-9	COC(=O)[CH]1[CH]2C[CH]3c4[nH]c5cc(OC)ccc5c4CCN3C[CH]2C[CH](OC(=O)/C=C/c2ccc(O)c(OC)c2)[CH]1OC	CAS:3735-85-1	COC(=O)[CH]1[CH]2C[CH]3c4[nH]c5cc(OC)ccc5c4CCN3C[CH]2C[CH](OC(=O)COc2ccc(OC)cc2)[CH]1OC	[*:1]C(=O)OC1CC2CN3CCc4c([nH]c5cc(OC)ccc45)C3CC2C(C(=O)OC)C1OC	[*:1]/C=C\c1ccc(O)c(OC)c1>>[*:1]COc1ccc(OC)cc1	0.72	no
123	CAS:73573-42-9	COC(=O)[CH]1[CH]2C[CH]3c4[nH]c5cc(OC)ccc5c4CCN3C[CH]2C[CH](OC(=O)/C=C/c2ccc(O)c(OC)c2)[CH]1OC	CAS:3735-85-1	COC(=O)[CH]1[CH]2C[CH]3c4[nH]c5cc(OC)ccc5c4CCN3C[CH]2C[CH](OC(=O)COc2ccc(OC)cc2)[CH]1OC	[*:1]C1CC2CN3CCc4c([nH]c5cc(OC)ccc45)C3CC2C(C(=O)OC)C1OC.[*:2]OC	[*:1]OC(=O)/C=C/c1ccc(O)c([*:2])c1>>[*:1]OC(=O)COc1ccc([*:2])cc1	0.72	no
124	CAS:73573-42-9	COC(=O)[CH]1[CH]2C[CH]3c4[nH]c5cc(OC)ccc5c4CCN3C[CH]2C[CH](OC(=O)/C=C/c2ccc(O)c(OC)c2)[CH]1OC	CAS:3735-85-1	COC(=O)[CH]1[CH]2C[CH]3c4[nH]c5cc(OC)ccc5c4CCN3C[CH]2C[CH](OC(=O)COc2ccc(OC)cc2)[CH]1OC	[*:2]C.[*:1]C1CC2CN3CCc4c([nH]c5cc(OC)ccc45)C3CC2C(C(=O)OC)C1OC	[*:1]OC(=O)/C=C/c1ccc(O)c(O[*:2])c1>>[*:1]OC(=O)COc1ccc(O[*:2])cc1	0.72	no
125	CAS:73573-42-9	COC(=O)[CH]1[CH]2C[CH]3c4[nH]c5cc(OC)ccc5c4CCN3C[CH]2C[CH](OC(=O)/C=C/c2ccc(O)c(OC)c2)[CH]1OC	CAS:3735-85-1	COC(=O)[CH]1[CH]2C[CH]3c4[nH]c5cc(OC)ccc5c4CCN3C[CH]2C[CH](OC(=O)COc2ccc(OC)cc2)[CH]1OC	[*:2]C.[*:1]C(=O)OC1CC2CN3CCc4c([nH]c5cc(OC)ccc45)C3CC2C(C(=O)OC)C1OC	[*:1]/C=C\c1ccc(O)c(O[*:2])c1>>[*:1]COc1ccc(O[*:2])cc1	0.72	no
126	CAS:73573-42-9	COC(=O)[CH]1[CH]2C[CH]3c4[nH]c5cc(OC)ccc5c4CCN3C[CH]2C[CH](OC(=O)/C=C/c2ccc(O)c(OC)c2)[CH]1OC	CAS:3735-85-1	COC(=O)[CH]1[CH]2C[CH]3c4[nH]c5cc(OC)ccc5c4CCN3C[CH]2C[CH](OC(=O)COc2ccc(OC)cc2)[CH]1OC	[*:1]C(=O)OC1CC2CN3CCc4c([nH]c5cc(OC)ccc45)C3CC2C(C(=O)OC)C1OC.[*:2]OC	[*:1]/C=C\c1ccc(O)c([*:2])c1>>[*:1]COc1ccc([*:2])cc1	0.72	no
127	CAS:2081-08-5	CC(c1ccc(O)cc1)c1ccc(O)cc1	CAS:2664-63-3	Oc1ccc(Sc2ccc(O)cc2)cc1	[*:1]c1ccc(O)cc1.[*:2]c1ccc(O)cc1	[*:1]C([*:2])C>>[*:1]S[*:2]	0.7	no
128	CAS:1582-09-8	CCCN(CCC)c1c([N+](=O)[O-])cc(C(F)(F)F)cc1[N+](=O)[O-]	CAS:19044-88-3	CCCN(CCC)c1c([N+](=O)[O-])cc(S(N)(=O)=O)cc1[N+](=O)[O-]	[*:1]c1cc([N+](=O)[O-])c(N(CCC)CCC)c([N+](=O)[O-])c1	[*:1]C(F)(F)F>>[*:1]S(N)(=O)=O	0.7	no
129	CAS:156-10-5	O=Nc1ccc(Nc2ccccc2)cc1	CAS:101-72-4	CC(C)Nc1ccc(Nc2ccccc2)cc1	[*:1]c1ccc(Nc2ccccc2)cc1	[*:1]N=O>>[*:1]NC(C)C	0.69	no
130	CAS:2081-08-5	CC(c1ccc(O)cc1)c1ccc(O)cc1	CAS:2971-36-0	Oc1ccc(C(c2ccc(O)cc2)C(Cl)(Cl)Cl)cc1	[*:1]C(c1ccc(O)cc1)c1ccc(O)cc1	[*:1]C>>[*:1]C(Cl)(Cl)Cl	0.69	no
131	CAS:2081-08-5	CC(c1ccc(O)cc1)c1ccc(O)cc1	CAS:2971-36-0	Oc1ccc(C(c2ccc(O)cc2)C(Cl)(Cl)Cl)cc1	[*:1]c1ccc(O)cc1.[*:2]c1ccc(O)cc1	[*:1]C([*:2])C>>[*:1]C([*:2])C(Cl)(Cl)Cl	0.69	no
132	CAS:33820-53-0	CCCN(CCC)c1c([N+](=O)[O-])cc(C(C)C)cc1[N+](=O)[O-]	CAS:19044-88-3	CCCN(CCC)c1c([N+](=O)[O-])cc(S(N)(=O)=O)cc1[N+](=O)[O-]	[*:1]c1cc([N+](=O)[O-])c(N(CCC)CCC)c([N+](=O)[O-])c1	[*:1]C(C)C>>[*:1]S(N)(=O)=O	0.68	no
133	CAS:27955-94-8	CC(c1ccc(O)cc1)(c1ccc(O)cc1)c1ccc(O)cc1	CAS:2081-08-5	CC(c1ccc(O)cc1)c1ccc(O)cc1	[*:1]C(C)(c1ccc(O)cc1)c1ccc(O)cc1	[*:1]c1ccc(O)cc1>>[*:1][H]	0.68	no
134	CAS:55283-68-6	C=C(C)CN(CC)c1c([N+](=O)[O-])cc(C(F)(F)F)cc1[N+](=O)[O-]	CAS:33245-39-5	CCCN(CCCl)c1c([N+](=O)[O-])cc(C(F)(F)F)cc1[N+](=O)[O-]	[*:1]c1c([N+](=O)[O-])cc(C(F)(F)F)cc1[N+](=O)[O-]	[*:1]N(CC)CC(=C)C>>[*:1]N(CCC)CCCl	0.67	no
135	CAS:1620-98-0	CC(C)(C)c1cc(C=O)cc(C(C)(C)C)c1O	CAS:489-01-0	COc1cc(C(C)(C)C)c(O)c(C(C)(C)C)c1	[*:1]c1cc(C(C)(C)C)c(O)c(C(C)(C)C)c1	[*:1]C=O>>[*:1]OC	0.67	no
136	CAS:2081-08-5	CC(c1ccc(O)cc1)c1ccc(O)cc1	CAS:843-55-0	Oc1ccc(C2(c3ccc(O)cc3)CCCCC2)cc1	[*:1]c1ccc(O)cc1.[*:2]c1ccc(O)cc1	[*:1]C([*:2])C>>[*:1]C1([*:2])CCCCC1	0.65	no
137	CAS:1571-75-1	CC(c1ccccc1)(c1ccc(O)cc1)c1ccc(O)cc1	CAS:2081-08-5	CC(c1ccc(O)cc1)c1ccc(O)cc1	[*:1]C.[*:2]c1ccc(O)cc1.[*:3]c1ccc(O)cc1	[*:1]C([*:2])([*:3])c1ccccc1>>[*:1]C([*:2])[*:3]	0.65	no
138	CAS:1571-75-1	CC(c1ccccc1)(c1ccc(O)cc1)c1ccc(O)cc1	CAS:2081-08-5	CC(c1ccc(O)cc1)c1ccc(O)cc1	[*:1]C(C)(c1ccc(O)cc1)c1ccc(O)cc1	[*:1]c1ccccc1>>[*:1][H]	0.65	no
139	CAS:98-07-7	ClC(Cl)(Cl)c1ccccc1	CAS:2648-61-5	O=C(c1ccccc1)C(Cl)Cl	[*:2]Cl.[*:3]Cl.[*:1]c1ccccc1	[*:1]C([*:2])([*:3])Cl>>[*:1]C(=O)C([*:2])[*:3]	0.64	no
140	CAS:14868-03-2	Oc1ccc(C(=C(Cl)Cl)c2ccc(O)cc2)cc1	CAS:2081-08-5	CC(c1ccc(O)cc1)c1ccc(O)cc1	[*:1]c1ccc(O)cc1.[*:2]c1ccc(O)cc1	[*:1]C([*:2])=C(Cl)Cl>>[*:1]C([*:2])C	0.64	no
141	CAS:115-86-6	O=P(Oc1ccccc1)(Oc1ccccc1)Oc1ccccc1	CAS:594-30-9	Cl[Bi](Cl)(c1ccccc1)(c1ccccc1)c1ccccc1	[*:1]c1ccccc1.[*:2]c1ccccc1.[*:3]c1ccccc1	[*:1]OP(=O)(O[*:2])O[*:3]>>[*:1][Bi]([*:2])([*:3])(Cl)Cl	0.62	no
142	CAS:101-72-4	CC(C)Nc1ccc(Nc2ccccc2)cc1	CAS:74-31-7	c1ccc(Nc2ccc(Nc3ccccc3)cc2)cc1	[*:1]Nc1ccc(Nc2ccccc2)cc1	[*:1]C(C)C>>[*:1]c1ccccc1	0.62	no
143	CAS:98-07-7	ClC(Cl)(Cl)c1ccccc1	CAS:532-27-4	O=C(CCl)c1ccccc1	[*:1]Cl.[*:2]c1ccccc1	[*:1]C([*:2])(Cl)Cl>>[*:1]CC([*:2])=O	0.61	no
144	CAS:80-10-4	Cl[Si](Cl)(c1ccccc1)c1ccccc1	CAS:886-38-4	O=c1c(-c2ccccc2)c1-c1ccccc1	[*:1]c1ccccc1.[*:2]c1ccccc1	[*:1][Si]([*:2])(Cl)Cl>>[*:1]c1c([*:2])c1=O	0.59	no
145	CAS:620-40-6	c1ccc(CN(Cc2ccccc2)Cc2ccccc2)cc1	CAS:603-36-1	c1ccc([Sb](c2ccccc2)c2ccccc2)cc1	[*:1]c1ccccc1.[*:2]c1ccccc1.[*:3]c1ccccc1	[*:1]CN(C[*:2])C[*:3]>>[*:1][Sb]([*:2])[*:3]	0.58	no
146	CAS:93-53-8	CC(C=O)c1ccccc1	CAS:122-78-1	O=CCc1ccccc1	[*:1]C(C=O)c1ccccc1	[*:1]C>>[*:1][H]	0.58	no
147	CAS:93-53-8	CC(C=O)c1ccccc1	CAS:122-78-1	O=CCc1ccccc1	[*:1]C=O.[*:2]c1ccccc1	[*:1]C([*:2])C>>[*:1]C[*:2]	0.58	no
148	CAS:744-45-6	O=C(Oc1ccccc1)c1cccc(C(=O)Oc2ccccc2)c1	CAS:84-62-8	O=C(Oc1ccccc1)c1ccccc1C(=O)Oc1ccccc1	[*:1]C(=O)Oc1ccccc1.[*:2]C(=O)Oc1ccccc1	[*:1]c1cccc([*:2])c1>>[*:1]c1ccccc1[*:2]	0.57	no
149	CAS:41663-84-7	CN1C(=O)c2ccc([N+](=O)[O-])cc2C1=O	CAS:89-40-7	O=C1NC(=O)c2cc([N+](=O)[O-])ccc21	[*:1]N1C(=O)c2ccc([N+](=O)[O-])cc2C1=O	[*:1]C>>[*:1][H]	0.57	no
150	CAS:80-05-7	CC(C)(c1ccc(O)cc1)c1ccc(O)cc1	CAS:2081-08-5	CC(c1ccc(O)cc1)c1ccc(O)cc1	[*:1]c1ccc(O)cc1.[*:2]c1ccc(O)cc1	[*:1]C([*:2])(C)C>>[*:1]C([*:2])C	0.57	no
151	CAS:80-05-7	CC(C)(c1ccc(O)cc1)c1ccc(O)cc1	CAS:2081-08-5	CC(c1ccc(O)cc1)c1ccc(O)cc1	[*:1]C.[*:2]c1ccc(O)cc1.[*:3]c1ccc(O)cc1	[*:1]C([*:2])([*:3])C>>[*:1]C([*:2])[*:3]	0.57	no
152	CAS:80-05-7	CC(C)(c1ccc(O)cc1)c1ccc(O)cc1	CAS:2081-08-5	CC(c1ccc(O)cc1)c1ccc(O)cc1	[*:1]C(C)(c1ccc(O)cc1)c1ccc(O)cc1	[*:1]C>>[*:1][H]	0.57	no
153	CAS:86780-90-7	COC(=O)C1=C(C)NC(C)=C(C(=O)OCC(C)=O)C1c1ccccc1[N+](=O)[O-]	CAS:21829-25-4	COC(=O)C1=C(C)NC(C)=C(C(=O)OC)C1c1ccccc1[N+](=O)[O-]	[*:1]C.[*:2]C1=C(C)NC(C)=C(C(=O)OC)C1c1ccccc1[N+](=O)[O-]	[*:1]C(=O)COC([*:2])=O>>[*:1]OC([*:2])=O	0.56	no
154	CAS:21829-25-4	COC(=O)C1=C(C)NC(C)=C(C(=O)OC)C1c1ccccc1[N+](=O)[O-]	CAS:86780-90-7	COC(=O)C1=C(C)NC(C)=C(C(=O)OCC(C)=O)C1c1ccccc1[N+](=O)[O-]	[*:1]OC(=O)C1=C(C)NC(C)=C(C(=O)OC)C1c1ccccc1[N+](=O)[O-]	[*:1]C>>[*:1]CC(C)=O	0.56	no
155	CAS:21829-25-4	COC(=O)C1=C(C)NC(C)=C(C(=O)OC)C1c1ccccc1[N+](=O)[O-]	CAS:86780-90-7	COC(=O)C1=C(C)NC(C)=C(C(=O)OCC(C)=O)C1c1ccccc1[N+](=O)[O-]	[*:1]C1=C(C)NC(C)=C(C(=O)OC)C1c1ccccc1[N+](=O)[O-]	[*:1]C(=O)OC>>[*:1]C(=O)OCC(C)=O	0.56	no
156	CAS:86780-90-7	COC(=O)C1=C(C)NC(C)=C(C(=O)OCC(C)=O)C1c1ccccc1[N+](=O)[O-]	CAS:21829-25-4	COC(=O)C1=C(C)NC(C)=C(C(=O)OC)C1c1ccccc1[N+](=O)[O-]	[*:1]COC(=O)C1=C(C)NC(C)=C(C(=O)OC)C1c1ccccc1[N+](=O)[O-]	[*:1]C(C)=O>>[*:1][H]	0.56	no
157	CAS:56-53-1	CC/C(=C(/CC)c1ccc(O)cc1)c1ccc(O)cc1	CAS:2081-08-5	CC(c1ccc(O)cc1)c1ccc(O)cc1	[*:1]c1ccc(O)cc1.[*:2]c1ccc(O)cc1	[*:1]/C(CC)=C(/[*:2])CC>>[*:1]C([*:2])C	0.56	no
158	CAS:120-95-6	CCC(C)(C)c1ccc(O)c(C(C)(C)CC)c1	CAS:80-46-6	CCC(C)(C)c1ccc(O)cc1	[*:1]c1cc(C(C)(C)CC)ccc1O	[*:1]C(C)(C)CC>>[*:1][H]	0.55	no
159	CAS:5300-03-8	CC1=C(/C=C/C(C)=C\C=C\C(C)=C\C(=O)O)C(C)(C)CCC1	CAS:4759-48-2	CC1=C(/C=C/C(C)=C/C=C/C(C)=C\C(=O)O)C(C)(C)CCC1	[*:3]/C=C/C1=C(C)CCCC1(C)C.[*:2]C.[*:1]C(=O)O	[*:1]/C=C([*:2])/C=C/C=C(/[*:3])C>>[*:1]/C=C([*:2])\C=C\C=C(/[*:3])C	0.54	no
160	CAS:5300-03-8	CC1=C(/C=C/C(C)=C\C=C\C(C)=C\C(=O)O)C(C)(C)CCC1	CAS:4759-48-2	CC1=C(/C=C/C(C)=C/C=C/C(C)=C\C(=O)O)C(C)(C)CCC1	[*:3]/C=C/C1=C(C)CCCC1(C)C.[*:2]C.[*:1]C(=O)O	[*:1]/C=C([*:2])/C=C/C=C(/[*:3])C>>[*:1]/C=C(C)\C=C\C=C([*:2])[*:3]	0.54	no
161	CAS:4759-48-2	CC1=C(/C=C/C(C)=C/C=C/C(C)=C\C(=O)O)C(C)(C)CCC1	CAS:5300-03-8	CC1=C(/C=C/C(C)=C\C=C\C(C)=C\C(=O)O)C(C)(C)CCC1	[*:3]/C=C/C1=C(C)CCCC1(C)C.[*:2]C.[*:1]C(=O)O	[*:1]/C=C([*:2])\C=C\C=C(/[*:3])C>>[*:1]/C=C(C)/C=C/C=C([*:2])[*:3]	0.54	no
162	CAS:5300-03-8	CC1=C(/C=C/C(C)=C\C=C\C(C)=C\C(=O)O)C(C)(C)CCC1	CAS:4759-48-2	CC1=C(/C=C/C(C)=C/C=C/C(C)=C\C(=O)O)C(C)(C)CCC1	[*:2]/C=C/C1=C(C)CCCC1(C)C.[*:3]C.[*:1]C(=O)O	[*:1]/C=C(C)/C=C/C=C([*:2])[*:3]>>[*:1]/C=C(C)\C=C\C=C([*:2])[*:3]	0.54	no
163	CAS:639-58-7	Cl[Sn](c1ccccc1)(c1ccccc1)c1ccccc1	CAS:900-95-8	CC(=O)O[Sn](c1ccccc1)(c1ccccc1)c1ccccc1	[*:1]c1ccccc1.[*:2]c1ccccc1.[*:3]c1ccccc1	[*:1][Sn]([*:2])([*:3])Cl>>[*:1][Sn]([*:2])([*:3])OC(C)=O	0.54	no
164	CAS:1210-39-5	O=CC=C(c1ccccc1)c1ccccc1	CAS:886-38-4	O=c1c(-c2ccccc2)c1-c1ccccc1	[*:1]c1ccccc1.[*:2]c1ccccc1	[*:1]C([*:2])=CC=O>>[*:1]c1c([*:2])c1=O	0.52	no
165	CAS:115-86-6	O=P(Oc1ccccc1)(Oc1ccccc1)Oc1ccccc1	CAS:791-31-1	O[Si](c1ccccc1)(c1ccccc1)c1ccccc1	[*:1]c1ccccc1.[*:2]c1ccccc1.[*:3]c1ccccc1	[*:1]OP(=O)(O[*:2])O[*:3]>>[*:1][Si]([*:2])([*:3])O	0.52	no
166	CAS:472-86-6	CC1=C(/C=C/C(C)=C/C=C/C(C)=C\C=O)C(C)(C)CCC1	CAS:68-26-8	CC1=C(/C=C/C(C)=C/C=C/C(C)=C/CO)C(C)(C)CCC1	[*:1]/C=C(C)/C=C/C1=C(C)CCCC1(C)C	[*:1]/C=C\C(C)=C/C=O>>[*:1]/C=C\C(C)=C\CO	0.52	no
167	CAS:472-86-6	CC1=C(/C=C/C(C)=C/C=C/C(C)=C\C=O)C(C)(C)CCC1	CAS:68-26-8	CC1=C(/C=C/C(C)=C/C=C/C(C)=C/CO)C(C)(C)CCC1	[*:1]/C=C/C=C(C)/C=C/C1=C(C)CCCC1(C)C	[*:1]/C(C)=C/C=O>>[*:1]/C(C)=C\CO	0.52	no
168	CAS:472-86-6	CC1=C(/C=C/C(C)=C/C=C/C(C)=C\C=O)C(C)(C)CCC1	CAS:68-26-8	CC1=C(/C=C/C(C)=C/C=C/C(C)=C/CO)C(C)(C)CCC1	[*:1]/C=C/C=C(C)/C=C/C1=C(C)CCCC1(C)C.[*:2]C	[*:1]C([*:2])=CC=O>>[*:1]C([*:2])=CCO	0.52	no
169	CAS:472-86-6	CC1=C(/C=C/C(C)=C/C=C/C(C)=C\C=O)C(C)(C)CCC1	CAS:68-26-8	CC1=C(/C=C/C(C)=C/C=C/C(C)=C/CO)C(C)(C)CCC1	[*:1]/C=C(C)/C=C/C1=C(C)CCCC1(C)C.[*:2]C	[*:1]/C=C\C([*:2])=C/C=O>>[*:1]/C=C\C([*:2])=C\CO	0.52	no
170	CAS:115-86-6	O=P(Oc1ccccc1)(Oc1ccccc1)Oc1ccccc1	CAS:1162-06-7	CC(=O)O[Pb](c1ccccc1)(c1ccccc1)c1ccccc1	[*:1]c1ccccc1.[*:2]c1ccccc1.[*:3]c1ccccc1	[*:1]OP(=O)(O[*:2])O[*:3]>>[*:1][Pb]([*:2])([*:3])OC(C)=O	0.51	no
171	CAS:497-39-2	Cc1cc(O)c(C(C)(C)C)cc1C(C)(C)C	CAS:96-76-4	CC(C)(C)c1ccc(O)c(C(C)(C)C)c1	[*:1]c1cc(O)c(C(C)(C)C)cc1C(C)(C)C	[*:1]C>>[*:1][H]	0.51	no
172	CAS:4759-48-2	CC1=C(/C=C/C(C)=C/C=C/C(C)=C\C(=O)O)C(C)(C)CCC1	CAS:68-26-8	CC1=C(/C=C/C(C)=C/C=C/C(C)=C/CO)C(C)(C)CCC1	[*:1]/C=C/C=C(C)/C=C/C1=C(C)CCCC1(C)C	[*:1]/C(C)=C/C(=O)O>>[*:1]/C(C)=C\CO	0.51	no
173	CAS:4759-48-2	CC1=C(/C=C/C(C)=C/C=C/C(C)=C\C(=O)O)C(C)(C)CCC1	CAS:68-26-8	CC1=C(/C=C/C(C)=C/C=C/C(C)=C/CO)C(C)(C)CCC1	[*:1]/C=C(C)/C=C/C1=C(C)CCCC1(C)C.[*:2]C	[*:1]/C=C\C([*:2])=C/C(=O)O>>[*:1]/C=C\C([*:2])=C\CO	0.51	no
174	CAS:4759-48-2	CC1=C(/C=C/C(C)=C/C=C/C(C)=C\C(=O)O)C(C)(C)CCC1	CAS:68-26-8	CC1=C(/C=C/C(C)=C/C=C/C(C)=C/CO)C(C)(C)CCC1	[*:1]/C=C/C=C(C)/C=C/C1=C(C)CCCC1(C)C.[*:2]C	[*:1]C([*:2])=CC(=O)O>>[*:1]C([*:2])=CCO	0.51	no
175	CAS:29091-05-2	CCN(CC)c1c([N+](=O)[O-])cc(C(F)(F)F)c(N)c1[N+](=O)[O-]	CAS:29091-21-2	CCCN(CCC)c1c([N+](=O)[O-])cc(C(F)(F)F)c(N)c1[N+](=O)[O-]	[*:1]c1c([N+](=O)[O-])cc(C(F)(F)F)c(N)c1[N+](=O)[O-]	[*:1]N(CC)CC>>[*:1]N(CCC)CCC	0.5	no
176	CAS:115-86-6	O=P(Oc1ccccc1)(Oc1ccccc1)Oc1ccccc1	CAS:603-33-8	c1ccc([Bi](c2ccccc2)c2ccccc2)cc1	[*:1]c1ccccc1.[*:2]c1ccccc1.[*:3]c1ccccc1	[*:1]OP(=O)(O[*:2])O[*:3]>>[*:1][Bi]([*:2])[*:3]	0.5	no
177	CAS:73573-42-9	COC(=O)[CH]1[CH]2C[CH]3c4[nH]c5cc(OC)ccc5c4CCN3C[CH]2C[CH](OC(=O)/C=C/c2ccc(O)c(OC)c2)[CH]1OC	CAS:50-55-5	COC(=O)[CH]1[CH]2C[CH]3c4[nH]c5cc(OC)ccc5c4CCN3C[CH]2C[CH](OC(=O)c2cc(OC)c(OC)c(OC)c2)[CH]1OC	[*:1]C(=O)OC1CC2CN3CCc4c([nH]c5cc(OC)ccc45)C3CC2C(C(=O)OC)C1OC	[*:1]/C=C\c1ccc(O)c(OC)c1>>[*:1]c1cc(OC)c(OC)c(OC)c1	0.49	no
178	CAS:73573-42-9	COC(=O)[CH]1[CH]2C[CH]3c4[nH]c5cc(OC)ccc5c4CCN3C[CH]2C[CH](OC(=O)/C=C/c2ccc(O)c(OC)c2)[CH]1OC	CAS:50-55-5	COC(=O)[CH]1[CH]2C[CH]3c4[nH]c5cc(OC)ccc5c4CCN3C[CH]2C[CH](OC(=O)c2cc(OC)c(OC)c(OC)c2)[CH]1OC	[*:1]C(=O)OC1CC2CN3CCc4c([nH]c5cc(OC)ccc45)C3CC2C(C(=O)OC)C1OC.[*:2]OC	[*:1]/C=C\c1ccc(O)c([*:2])c1>>[*:1]c1cc([*:2])c(OC)c(OC)c1	0.49	no
179	CAS:73573-42-9	COC(=O)[CH]1[CH]2C[CH]3c4[nH]c5cc(OC)ccc5c4CCN3C[CH]2C[CH](OC(=O)/C=C/c2ccc(O)c(OC)c2)[CH]1OC	CAS:50-55-5	COC(=O)[CH]1[CH]2C[CH]3c4[nH]c5cc(OC)ccc5c4CCN3C[CH]2C[CH](OC(=O)c2cc(OC)c(OC)c(OC)c2)[CH]1OC	[*:2]C.[*:1]C(=O)OC1CC2CN3CCc4c([nH]c5cc(OC)ccc45)C3CC2C(C(=O)OC)C1OC	[*:1]/C=C\c1ccc(O)c(O[*:2])c1>>[*:2]Oc1c(OC)cc([*:1])cc1OC	0.49	no
180	CAS:73573-42-9	COC(=O)[CH]1[CH]2C[CH]3c4[nH]c5cc(OC)ccc5c4CCN3C[CH]2C[CH](OC(=O)/C=C/c2ccc(O)c(OC)c2)[CH]1OC	CAS:50-55-5	COC(=O)[CH]1[CH]2C[CH]3c4[nH]c5cc(OC)ccc5c4CCN3C[CH]2C[CH](OC(=O)c2cc(OC)c(OC)c(OC)c2)[CH]1OC	[*:2]C.[*:1]C(=O)OC1CC2CN3CCc4c([nH]c5cc(OC)ccc45)C3CC2C(C(=O)OC)C1OC	[*:1]/C=C\c1ccc(O)c(O[*:2])c1>>[*:2]Oc1cc([*:1])cc(OC)c1OC	0.49	no
181	CAS:73573-42-9	COC(=O)[CH]1[CH]2C[CH]3c4[nH]c5cc(OC)ccc5c4CCN3C[CH]2C[CH](OC(=O)/C=C/c2ccc(O)c(OC)c2)[CH]1OC	CAS:50-55-5	COC(=O)[CH]1[CH]2C[CH]3c4[nH]c5cc(OC)ccc5c4CCN3C[CH]2C[CH](OC(=O)c2cc(OC)c(OC)c(OC)c2)[CH]1OC	[*:1]C1CC2CN3CCc4c([nH]c5cc(OC)ccc45)C3CC2C(C(=O)OC)C1OC.[*:2]OC	[*:1]OC(=O)/C=C/c1ccc(O)c([*:2])c1>>[*:1]OC(=O)c1cc([*:2])c(OC)c(OC)c1	0.49	no
182	CAS:73573-42-9	COC(=O)[CH]1[CH]2C[CH]3c4[nH]c5cc(OC)ccc5c4CCN3C[CH]2C[CH](OC(=O)/C=C/c2ccc(O)c(OC)c2)[CH]1OC	CAS:50-55-5	COC(=O)[CH]1[CH]2C[CH]3c4[nH]c5cc(OC)ccc5c4CCN3C[CH]2C[CH](OC(=O)c2cc(OC)c(OC)c(OC)c2)[CH]1OC	[*:1]C1CC2CN3CCc4c([nH]c5cc(OC)ccc45)C3CC2C(C(=O)OC)C1OC.[*:2]OC	[*:1]OC(=O)/C=C/c1ccc(O)c([*:2])c1>>[*:1]OC(=O)c1cc(OC)c([*:2])c(OC)c1	0.49	no
183	CAS:73573-42-9	COC(=O)[CH]1[CH]2C[CH]3c4[nH]c5cc(OC)ccc5c4CCN3C[CH]2C[CH](OC(=O)/C=C/c2ccc(O)c(OC)c2)[CH]1OC	CAS:50-55-5	COC(=O)[CH]1[CH]2C[CH]3c4[nH]c5cc(OC)ccc5c4CCN3C[CH]2C[CH](OC(=O)c2cc(OC)c(OC)c(OC)c2)[CH]1OC	[*:1]C(=O)OC1CC2CN3CCc4c([nH]c5cc(OC)ccc45)C3CC2C(C(=O)OC)C1OC.[*:2]OC	[*:1]/C=C\c1ccc(O)c([*:2])c1>>[*:1]c1cc(OC)c([*:2])c(OC)c1	0.49	no
184	CAS:77-40-7	CCC(C)(c1ccc(O)cc1)c1ccc(O)cc1	CAS:2081-08-5	CC(c1ccc(O)cc1)c1ccc(O)cc1	[*:1]C.[*:2]c1ccc(O)cc1.[*:3]c1ccc(O)cc1	[*:1]C([*:2])([*:3])CC>>[*:1]C([*:2])[*:3]	0.49	no
185	CAS:77-40-7	CCC(C)(c1ccc(O)cc1)c1ccc(O)cc1	CAS:2081-08-5	CC(c1ccc(O)cc1)c1ccc(O)cc1	[*:1]C(C)(c1ccc(O)cc1)c1ccc(O)cc1	[*:1]CC>>[*:1][H]	0.49	no
186	CAS:77-40-7	CCC(C)(c1ccc(O)cc1)c1ccc(O)cc1	CAS:2081-08-5	CC(c1ccc(O)cc1)c1ccc(O)cc1	[*:1]c1ccc(O)cc1.[*:2]c1ccc(O)cc1	[*:1]C([*:2])(C)CC>>[*:1]C([*:2])C	0.49	no
187	CAS:77-40-7	CCC(C)(c1ccc(O)cc1)c1ccc(O)cc1	CAS:6898-97-1	CCC(=C(CC)c1ccc(O)cc1)c1ccc(O)cc1	[*:1]CC.[*:2]c1ccc(O)cc1.[*:3]c1ccc(O)cc1	[*:1]C([*:2])([*:3])C>>[*:1]C([*:2])=C([*:3])CC	0.48	no
188	CAS:77-40-7	CCC(C)(c1ccc(O)cc1)c1ccc(O)cc1	CAS:6898-97-1	CCC(=C(CC)c1ccc(O)cc1)c1ccc(O)cc1	[*:1]c1ccc(O)cc1.[*:2]c1ccc(O)cc1	[*:1]C([*:2])(C)CC>>[*:1]C(CC)=C([*:2])CC	0.48	no
189	CAS:95-80-7	Cc1ccc(N)cc1N	CAS:2835-95-2	Cc1ccc(N)cc1O	[*:1]c1cc(N)ccc1C	[*:1]N>>[*:1]O	0.47	no
190	CAS:829-74-3	C[CH](N)[CH](O)c1ccc(O)c(O)c1	CAS:51-41-2	NC[CH](O)c1ccc(O)c(O)c1	[*:1]C(N)C(O)c1ccc(O)c(O)c1	[*:1]C>>[*:1][H]	0.46	no
191	CAS:829-74-3	C[CH](N)[CH](O)c1ccc(O)c(O)c1	CAS:51-41-2	NC[CH](O)c1ccc(O)c(O)c1	[*:3]N.[*:1]O.[*:2]c1ccc(O)c(O)c1	[*:1]C([*:2])C([*:3])C>>[*:3]CC([*:1])[*:2]	0.46	no
192	CAS:829-74-3	C[CH](N)[CH](O)c1ccc(O)c(O)c1	CAS:51-41-2	NC[CH](O)c1ccc(O)c(O)c1	[*:1]N.[*:2]c1ccc(O)c(O)c1	[*:1]C(C)C([*:2])O>>[*:1]CC([*:2])O	0.46	no
193	CAS:829-74-3	C[CH](N)[CH](O)c1ccc(O)c(O)c1	CAS:51-41-2	NC[CH](O)c1ccc(O)c(O)c1	[*:1]O.[*:2]c1ccc(O)c(O)c1	[*:1]C([*:2])C(C)N>>[*:1]C([*:2])CN	0.46	no
194	CAS:829-74-3	C[CH](N)[CH](O)c1ccc(O)c(O)c1	CAS:51-41-2	NC[CH](O)c1ccc(O)c(O)c1	[*:1]C(O)c1ccc(O)c(O)c1	[*:1]C(C)N>>[*:1]CN	0.46	no
195	CAS:829-74-3	C[CH](N)[CH](O)c1ccc(O)c(O)c1	CAS:51-41-2	NC[CH](O)c1ccc(O)c(O)c1	[*:1]C(O)c1ccc(O)c(O)c1.[*:2]N	[*:1]C([*:2])C>>[*:1]C[*:2]	0.46	no
196	CAS:68-22-4	C#C[C]1(O)CC[CH]2[CH]3CCC4=CC(=O)CC[CH]4[CH]3CC[C]21C	CAS:797-63-7	C#C[C]1(O)CC[CH]2[CH]3CCC4=CC(=O)CC[CH]4[CH]3CC[C]21CC	[*:1]C12CCC3C4CCC(=O)C=C4CCC3C1CCC2(O)C#C	[*:1]C>>[*:1]CC	0.46	no
197	CAS:93-53-8	CC(C=O)c1ccccc1	CAS:104-53-0	O=CCCc1ccccc1	[*:1]C=O.[*:2]c1ccccc1	[*:1]C([*:2])C>>[*:1]CC[*:2]	0.44	no
198	CAS:481-85-6	Cc1cc(O)c2ccccc2c1O	CAS:31519-22-9	O=C(O)c1cc(O)c2ccccc2c1O	[*:1]c1cc(O)c2ccccc2c1O	[*:1]C>>[*:1]C(=O)O	0.43	no
199	CAS:56-53-1	CC/C(=C(/CC)c1ccc(O)cc1)c1ccc(O)cc1	CAS:6898-97-1	CCC(=C(CC)c1ccc(O)cc1)c1ccc(O)cc1	[*:1]c1ccc(O)cc1.[*:2]c1ccc(O)cc1	[*:1]/C(CC)=C(/[*:2])CC>>[*:1]C(CC)=C([*:2])CC	0.41	no
200	CAS:1241-94-7	CCCCC(CC)COP(=O)(Oc1ccccc1)Oc1ccccc1	CAS:115-86-6	O=P(Oc1ccccc1)(Oc1ccccc1)Oc1ccccc1	[*:1]OP(=O)(Oc1ccccc1)Oc1ccccc1	[*:1]CC(CC)CCCC>>[*:1]c1ccccc1	0.41	no
201	CAS:80-05-7	CC(C)(c1ccc(O)cc1)c1ccc(O)cc1	CAS:6898-97-1	CCC(=C(CC)c1ccc(O)cc1)c1ccc(O)cc1	[*:1]c1ccc(O)cc1.[*:2]c1ccc(O)cc1	[*:1]C([*:2])(C)C>>[*:1]C(CC)=C([*:2])CC	0.4	no
202	CID:34697	CC(C)CCCCCCCOP(=O)(Oc1ccccc1)Oc1ccccc1	CID:6528	Cc1ccc(OP(=O)(Oc2ccccc2)Oc2ccccc2)cc1	[*:2]C.[*:1]OP(=O)(Oc1ccccc1)Oc1ccccc1	[*:1]CCCCCCC[C@H]([*:2])C>>[*:1]c1ccc([*:2])cc1	0.4	no
203	CID:34697	CC(C)CCCCCCCOP(=O)(Oc1ccccc1)Oc1ccccc1	CID:6528	Cc1ccc(OP(=O)(Oc2ccccc2)Oc2ccccc2)cc1	[*:2]C.[*:1]OP(=O)(Oc1ccccc1)Oc1ccccc1	[*:1]CCCCCCC[C@@H]([*:2])C>>[*:1]c1ccc([*:2])cc1	0.4	no
204	CID:34697	CC(C)CCCCCCCOP(=O)(Oc1ccccc1)Oc1ccccc1	CID:6528	Cc1ccc(OP(=O)(Oc2ccccc2)Oc2ccccc2)cc1	[*:2]C.[*:1]OP(=O)(Oc1ccccc1)Oc1ccccc1	[*:1]CCCCCCCC([*:2])C>>[*:1]c1ccc([*:2])cc1	0.4	no
205	CAS:2835-68-9	NC(=O)c1ccc(N)cc1	CAS:123-30-8	Nc1ccc(O)cc1	[*:1]c1ccc(N)cc1	[*:1]C(N)=O>>[*:1]O	0.4	no
206	CAS:59-85-8	O=C(O)c1ccc([Hg]Cl)cc1	CAS:100-56-1	Cl[Hg]c1ccccc1	[*:1]c1ccc([Hg]Cl)cc1	[*:1]C(=O)O>>[*:1][H]	0.4	no
207	CAS:80-46-6	CCC(C)(C)c1ccc(O)cc1	CAS:140-66-9	CC(C)(C)CC(C)(C)c1ccc(O)cc1	[*:1]C(C)(C)c1ccc(O)cc1	[*:1]CC>>[*:1]CC(C)(C)C	0.39	no
208	CAS:452-86-8	Cc1ccc(O)c(O)c1	CAS:51-41-2	NC[CH](O)c1ccc(O)c(O)c1	[*:1]c1ccc(O)c(O)c1	[*:1]C>>[*:1]C(O)CN	0.38	no
209	CID:34697	CC(C)CCCCCCCOP(=O)(Oc1ccccc1)Oc1ccccc1	CID:158333	CC(C)(C)c1ccccc1OP(=O)(Oc1ccccc1)Oc1ccccc1	[*:2]C.[*:3]C.[*:1]OP(=O)(Oc1ccccc1)Oc1ccccc1	[*:1]CCCCCCCC([*:2])[*:3]>>[*:1]c1ccccc1C([*:2])([*:3])C	0.38	no
210	CID:34697	CC(C)CCCCCCCOP(=O)(Oc1ccccc1)Oc1ccccc1	CID:158333	CC(C)(C)c1ccccc1OP(=O)(Oc1ccccc1)Oc1ccccc1	[*:2]C.[*:1]OP(=O)(Oc1ccccc1)Oc1ccccc1	[*:1]CCCCCCC[C@@H]([*:2])C>>[*:1]c1ccccc1C([*:2])(C)C	0.38	no
211	CID:34697	CC(C)CCCCCCCOP(=O)(Oc1ccccc1)Oc1ccccc1	CID:158333	CC(C)(C)c1ccccc1OP(=O)(Oc1ccccc1)Oc1ccccc1	[*:2]C.[*:1]OP(=O)(Oc1ccccc1)Oc1ccccc1	[*:1]CCCCCCC[C@H]([*:2])C>>[*:1]c1ccccc1C([*:2])(C)C	0.38	no
212	CID:34697	CC(C)CCCCCCCOP(=O)(Oc1ccccc1)Oc1ccccc1	CID:158333	CC(C)(C)c1ccccc1OP(=O)(Oc1ccccc1)Oc1ccccc1	[*:2]C.[*:1]OP(=O)(Oc1ccccc1)Oc1ccccc1	[*:1]CCCCCCCC([*:2])C>>[*:1]c1ccccc1C([*:2])(C)C	0.38	no
213	CAS:71653-63-9	COC(=O)C1=C(C)NC(C)=C(C(=O)OC)C1c1ccccc1OC(F)F	CAS:21829-25-4	COC(=O)C1=C(C)NC(C)=C(C(=O)OC)C1c1ccccc1[N+](=O)[O-]	[*:1]c1ccccc1C1C(C(=O)OC)=C(C)NC(C)=C1C(=O)OC	[*:1]OC(F)F>>[*:1][N+](=O)[O-]	0.37	no
214	CAS:55283-68-6	C=C(C)CN(CC)c1c([N+](=O)[O-])cc(C(F)(F)F)cc1[N+](=O)[O-]	CAS:1861-40-1	CCCCN(CC)c1c([N+](=O)[O-])cc(C(F)(F)F)cc1[N+](=O)[O-]	[*:1]c1c([N+](=O)[O-])cc(C(F)(F)F)cc1[N+](=O)[O-]	[*:1]N(CC)CC(=C)C>>[*:1]N(CC)CCCC	0.37	no
215	CAS:55283-68-6	C=C(C)CN(CC)c1c([N+](=O)[O-])cc(C(F)(F)F)cc1[N+](=O)[O-]	CAS:1861-40-1	CCCCN(CC)c1c([N+](=O)[O-])cc(C(F)(F)F)cc1[N+](=O)[O-]	[*:1]CC.[*:2]c1c([N+](=O)[O-])cc(C(F)(F)F)cc1[N+](=O)[O-]	[*:1]N([*:2])CC(=C)C>>[*:1]N([*:2])CCCC	0.37	no
216	CAS:55283-68-6	C=C(C)CN(CC)c1c([N+](=O)[O-])cc(C(F)(F)F)cc1[N+](=O)[O-]	CAS:1861-40-1	CCCCN(CC)c1c([N+](=O)[O-])cc(C(F)(F)F)cc1[N+](=O)[O-]	[*:1]N(CC)c1c([N+](=O)[O-])cc(C(F)(F)F)cc1[N+](=O)[O-]	[*:1]CC(=C)C>>[*:1]CCCC	0.37	no
217	CAS:133-06-2	O=C1C2CC=CCC2C(=O)N1SC(Cl)(Cl)Cl	CAS:2425-06-1	O=C1C2CC=CCC2C(=O)N1SC(Cl)(Cl)C(Cl)Cl	[*:1]Cl.[*:2]Cl.[*:3]SN1C(=O)C2CC=CCC2C1=O	[*:1]C([*:2])([*:3])Cl>>[*:1]C(Cl)C([*:2])([*:3])Cl	0.37	no
218	CAS:133-06-2	O=C1C2CC=CCC2C(=O)N1SC(Cl)(Cl)Cl	CAS:2425-06-1	O=C1C2CC=CCC2C(=O)N1SC(Cl)(Cl)C(Cl)Cl	[*:1]Cl.[*:2]SN1C(=O)C2CC=CCC2C1=O	[*:1]C([*:2])(Cl)Cl>>[*:1]C(Cl)C([*:2])(Cl)Cl	0.37	no
219	CAS:133-06-2	O=C1C2CC=CCC2C(=O)N1SC(Cl)(Cl)Cl	CAS:2425-06-1	O=C1C2CC=CCC2C(=O)N1SC(Cl)(Cl)C(Cl)Cl	[*:1]Cl.[*:2]SN1C(=O)C2CC=CCC2C1=O	[*:1]C([*:2])(Cl)Cl>>[*:1][C@@H](Cl)C([*:2])(Cl)Cl	0.37	no
220	CAS:133-06-2	O=C1C2CC=CCC2C(=O)N1SC(Cl)(Cl)Cl	CAS:2425-06-1	O=C1C2CC=CCC2C(=O)N1SC(Cl)(Cl)C(Cl)Cl	[*:1]Cl.[*:2]Cl.[*:3]SN1C(=O)C2CC=CCC2C1=O	[*:1]C([*:2])([*:3])Cl>>[*:1][C@@H](Cl)C([*:2])([*:3])Cl	0.37	no
221	CAS:133-06-2	O=C1C2CC=CCC2C(=O)N1SC(Cl)(Cl)Cl	CAS:2425-06-1	O=C1C2CC=CCC2C(=O)N1SC(Cl)(Cl)C(Cl)Cl	[*:1]Cl.[*:2]SN1C(=O)C2CC=CCC2C1=O	[*:1]C([*:2])(Cl)Cl>>[*:1][C@H](Cl)C([*:2])(Cl)Cl	0.37	no
222	CAS:133-06-2	O=C1C2CC=CCC2C(=O)N1SC(Cl)(Cl)Cl	CAS:2425-06-1	O=C1C2CC=CCC2C(=O)N1SC(Cl)(Cl)C(Cl)Cl	[*:1]Cl.[*:2]Cl.[*:3]SN1C(=O)C2CC=CCC2C1=O	[*:1]C([*:2])([*:3])Cl>>[*:1]C([*:2])C([*:3])(Cl)Cl	0.37	no
223	CAS:2425-06-1	O=C1C2CC=CCC2C(=O)N1SC(Cl)(Cl)C(Cl)Cl	CAS:133-06-2	O=C1C2CC=CCC2C(=O)N1SC(Cl)(Cl)Cl	[*:1]C(Cl)(Cl)SN1C(=O)C2CC=CCC2C1=O	[*:1]C(Cl)Cl>>[*:1]Cl	0.37	no
224	CAS:2425-06-1	O=C1C2CC=CCC2C(=O)N1SC(Cl)(Cl)C(Cl)Cl	CAS:133-06-2	O=C1C2CC=CCC2C(=O)N1SC(Cl)(Cl)Cl	[*:1]SN1C(=O)C2CC=CCC2C1=O	[*:1]C(Cl)(Cl)C(Cl)Cl>>[*:1]C(Cl)(Cl)Cl	0.37	no
225	CAS:2425-06-1	O=C1C2CC=CCC2C(=O)N1SC(Cl)(Cl)C(Cl)Cl	CAS:133-06-2	O=C1C2CC=CCC2C(=O)N1SC(Cl)(Cl)Cl	[*:1]Cl.[*:2]Cl.[*:3]SN1C(=O)C2CC=CCC2C1=O	[*:1]C([*:2])([*:3])C(Cl)Cl>>[*:1]C([*:2])([*:3])Cl	0.37	no
226	CAS:133-06-2	O=C1C2CC=CCC2C(=O)N1SC(Cl)(Cl)Cl	CAS:2425-06-1	O=C1C2CC=CCC2C(=O)N1SC(Cl)(Cl)C(Cl)Cl	[*:1]Cl.[*:2]Cl.[*:3]SN1C(=O)C2CC=CCC2C1=O	[*:1]C([*:2])([*:3])Cl>>[*:1][C@H](Cl)C([*:2])([*:3])Cl	0.37	no
227	CAS:2425-06-1	O=C1C2CC=CCC2C(=O)N1SC(Cl)(Cl)C(Cl)Cl	CAS:133-06-2	O=C1C2CC=CCC2C(=O)N1SC(Cl)(Cl)Cl	[*:1]Cl.[*:2]SN1C(=O)C2CC=CCC2C1=O	[*:1]C([*:2])(Cl)C(Cl)Cl>>[*:1]C([*:2])(Cl)Cl	0.37	no
228	CAS:379-52-2	F[Sn](c1ccccc1)(c1ccccc1)c1ccccc1	CAS:900-95-8	CC(=O)O[Sn](c1ccccc1)(c1ccccc1)c1ccccc1	[*:1]c1ccccc1.[*:2]c1ccccc1.[*:3]c1ccccc1	[*:1][Sn]([*:2])([*:3])F>>[*:1][Sn]([*:2])([*:3])OC(C)=O	0.37	no
229	CAS:33820-53-0	CCCN(CCC)c1c([N+](=O)[O-])cc(C(C)C)cc1[N+](=O)[O-]	CAS:4726-14-1	CCCN(CCC)c1c([N+](=O)[O-])cc(S(C)(=O)=O)cc1[N+](=O)[O-]	[*:1]C.[*:2]c1cc([N+](=O)[O-])c(N(CCC)CCC)c([N+](=O)[O-])c1	[*:1]C([*:2])C>>[*:1]S([*:2])(=O)=O	0.36	no
230	CAS:33820-53-0	CCCN(CCC)c1c([N+](=O)[O-])cc(C(C)C)cc1[N+](=O)[O-]	CAS:4726-14-1	CCCN(CCC)c1c([N+](=O)[O-])cc(S(C)(=O)=O)cc1[N+](=O)[O-]	[*:1]c1cc([N+](=O)[O-])c(N(CCC)CCC)c([N+](=O)[O-])c1	[*:1]C(C)C>>[*:1]S(C)(=O)=O	0.36	no
231	CAS:65646-68-6	CC1=C(/C=C/C(C)=C/C=C/C(C)=C/C(=O)Nc2ccc(O)cc2)C(C)(C)CCC1	CAS:68-26-8	CC1=C(/C=C/C(C)=C/C=C/C(C)=C/CO)C(C)(C)CCC1	[*:1]/C=C(C)/C=C/C=C(C)/C=C/C1=C(C)CCCC1(C)C.[*:2]O	[*:1]C(=O)Nc1ccc([*:2])cc1>>[*:1]C[*:2]	0.36	no
232	CAS:4945-47-5	CN1CCC(N(Cc2ccccc2)c2ccccc2)CC1	CAS:86-12-4	CN1CCC(N(Cc2cccs2)c2ccccc2)CC1	[*:1]CN(c1ccccc1)C1CCN(C)CC1	[*:1]c1ccccc1>>[*:1]c1cccs1	0.35	no
233	CAS:4945-47-5	CN1CCC(N(Cc2ccccc2)c2ccccc2)CC1	CAS:86-12-4	CN1CCC(N(Cc2cccs2)c2ccccc2)CC1	[*:1]N(c1ccccc1)C1CCN(C)CC1	[*:1]Cc1ccccc1>>[*:1]Cc1cccs1	0.35	no
234	CAS:55283-68-6	C=C(C)CN(CC)c1c([N+](=O)[O-])cc(C(F)(F)F)cc1[N+](=O)[O-]	CAS:1582-09-8	CCCN(CCC)c1c([N+](=O)[O-])cc(C(F)(F)F)cc1[N+](=O)[O-]	[*:1]c1c([N+](=O)[O-])cc(C(F)(F)F)cc1[N+](=O)[O-]	[*:1]N(CC)CC(=C)C>>[*:1]N(CCC)CCC	0.35	no
235	CAS:76-87-9	O[Sn](c1ccccc1)(c1ccccc1)c1ccccc1	CAS:900-95-8	CC(=O)O[Sn](c1ccccc1)(c1ccccc1)c1ccccc1	[*:1]c1ccccc1.[*:2]c1ccccc1.[*:3]c1ccccc1	[*:1][Sn]([*:2])([*:3])O>>[*:1][Sn]([*:2])([*:3])OC(C)=O	0.34	no
236	CAS:1582-09-8	CCCN(CCC)c1c([N+](=O)[O-])cc(C(F)(F)F)cc1[N+](=O)[O-]	CAS:4726-14-1	CCCN(CCC)c1c([N+](=O)[O-])cc(S(C)(=O)=O)cc1[N+](=O)[O-]	[*:1]c1cc([N+](=O)[O-])c(N(CCC)CCC)c([N+](=O)[O-])c1	[*:1]C(F)(F)F>>[*:1]S(C)(=O)=O	0.34	no
237	CAS:26399-36-0	CCCN(CC1CC1)c1c([N+](=O)[O-])cc(C(F)(F)F)cc1[N+](=O)[O-]	CAS:33245-39-5	CCCN(CCCl)c1c([N+](=O)[O-])cc(C(F)(F)F)cc1[N+](=O)[O-]	[*:1]N(CCC)c1c([N+](=O)[O-])cc(C(F)(F)F)cc1[N+](=O)[O-]	[*:1]CC1CC1>>[*:1]CCCl	0.34	no
238	CAS:26399-36-0	CCCN(CC1CC1)c1c([N+](=O)[O-])cc(C(F)(F)F)cc1[N+](=O)[O-]	CAS:33245-39-5	CCCN(CCCl)c1c([N+](=O)[O-])cc(C(F)(F)F)cc1[N+](=O)[O-]	[*:1]CCC.[*:2]c1c([N+](=O)[O-])cc(C(F)(F)F)cc1[N+](=O)[O-]	[*:1]N([*:2])CC1CC1>>[*:1]N([*:2])CCCl	0.34	no
239	CAS:26399-36-0	CCCN(CC1CC1)c1c([N+](=O)[O-])cc(C(F)(F)F)cc1[N+](=O)[O-]	CAS:33245-39-5	CCCN(CCCl)c1c([N+](=O)[O-])cc(C(F)(F)F)cc1[N+](=O)[O-]	[*:1]c1c([N+](=O)[O-])cc(C(F)(F)F)cc1[N+](=O)[O-]	[*:1]N(CCC)CC1CC1>>[*:1]N(CCC)CCCl	0.34	no
240	CAS:62-23-7	O=C(O)c1ccc([N+](=O)[O-])cc1	CAS:100-29-8	CCOc1ccc([N+](=O)[O-])cc1	[*:1]c1ccc([N+](=O)[O-])cc1	[*:1]C(=O)O>>[*:1]OCC	0.34	no
241	CAS:55283-68-6	C=C(C)CN(CC)c1c([N+](=O)[O-])cc(C(F)(F)F)cc1[N+](=O)[O-]	CAS:26399-36-0	CCCN(CC1CC1)c1c([N+](=O)[O-])cc(C(F)(F)F)cc1[N+](=O)[O-]	[*:1]c1c([N+](=O)[O-])cc(C(F)(F)F)cc1[N+](=O)[O-]	[*:1]N(CC)CC(=C)C>>[*:1]N(CCC)CC1CC1	0.33	no
242	CAS:14868-03-2	Oc1ccc(C(=C(Cl)Cl)c2ccc(O)cc2)cc1	CAS:6898-97-1	CCC(=C(CC)c1ccc(O)cc1)c1ccc(O)cc1	[*:1]c1ccc(O)cc1.[*:2]c1ccc(O)cc1	[*:1]C([*:2])=C(Cl)Cl>>[*:1]C(CC)=C([*:2])CC	0.33	no
243	CAS:85-60-9	CCCC(c1cc(C(C)(C)C)c(O)cc1C)c1cc(C(C)(C)C)c(O)cc1C	CAS:96-69-5	Cc1cc(O)c(C(C)(C)C)cc1Sc1cc(C(C)(C)C)c(O)cc1C	[*:1]c1cc(C(C)(C)C)c(O)cc1C.[*:2]c1cc(C(C)(C)C)c(O)cc1C	[*:1]C([*:2])CCC>>[*:1]S[*:2]	0.32	no
244	CAS:1582-09-8	CCCN(CCC)c1c([N+](=O)[O-])cc(C(F)(F)F)cc1[N+](=O)[O-]	CAS:33245-39-5	CCCN(CCCl)c1c([N+](=O)[O-])cc(C(F)(F)F)cc1[N+](=O)[O-]	[*:1]c1c([N+](=O)[O-])cc(C(F)(F)F)cc1[N+](=O)[O-]	[*:1]N(CCC)CCC>>[*:1]N(CCC)CCCl	0.32	no
245	CAS:1582-09-8	CCCN(CCC)c1c([N+](=O)[O-])cc(C(F)(F)F)cc1[N+](=O)[O-]	CAS:33245-39-5	CCCN(CCCl)c1c([N+](=O)[O-])cc(C(F)(F)F)cc1[N+](=O)[O-]	[*:1]N(CCC)c1c([N+](=O)[O-])cc(C(F)(F)F)cc1[N+](=O)[O-]	[*:1]CCC>>[*:1]CCCl	0.32	no
246	CAS:1582-09-8	CCCN(CCC)c1c([N+](=O)[O-])cc(C(F)(F)F)cc1[N+](=O)[O-]	CAS:33245-39-5	CCCN(CCCl)c1c([N+](=O)[O-])cc(C(F)(F)F)cc1[N+](=O)[O-]	[*:1]CCC.[*:2]c1c([N+](=O)[O-])cc(C(F)(F)F)cc1[N+](=O)[O-]	[*:1]N([*:2])CCC>>[*:1]N([*:2])CCCl	0.32	no
247	CAS:6898-97-1	CCC(=C(CC)c1ccc(O)cc1)c1ccc(O)cc1	CAS:843-55-0	Oc1ccc(C2(c3ccc(O)cc3)CCCCC2)cc1	[*:1]c1ccc(O)cc1.[*:2]c1ccc(O)cc1	[*:1]C(CC)=C([*:2])CC>>[*:1]C1([*:2])CCCCC1	0.32	no
248	CAS:620-40-6	c1ccc(CN(Cc2ccccc2)Cc2ccccc2)cc1	CAS:791-31-1	O[Si](c1ccccc1)(c1ccccc1)c1ccccc1	[*:1]c1ccccc1.[*:2]c1ccccc1.[*:3]c1ccccc1	[*:1]CN(C[*:2])C[*:3]>>[*:1][Si]([*:2])([*:3])O	0.31	no
249	CAS:603-33-8	c1ccc([Bi](c2ccccc2)c2ccccc2)cc1	CAS:603-36-1	c1ccc([Sb](c2ccccc2)c2ccccc2)cc1	[*:1]c1ccccc1.[*:2]c1ccccc1.[*:3]c1ccccc1	[*:1][Bi]([*:2])[*:3]>>[*:1][Sb]([*:2])[*:3]	0.31	no
250	CAS:1861-40-1	CCCCN(CC)c1c([N+](=O)[O-])cc(C(F)(F)F)cc1[N+](=O)[O-]	CAS:33245-39-5	CCCN(CCCl)c1c([N+](=O)[O-])cc(C(F)(F)F)cc1[N+](=O)[O-]	[*:1]c1c([N+](=O)[O-])cc(C(F)(F)F)cc1[N+](=O)[O-]	[*:1]N(CC)CCCC>>[*:1]N(CCC)CCCl	0.31	no
251	CAS:59-85-8	O=C(O)c1ccc([Hg]Cl)cc1	CAS:62-23-7	O=C(O)c1ccc([N+](=O)[O-])cc1	[*:1]c1ccc(C(=O)O)cc1	[*:1][Hg]Cl>>[*:1][N+](=O)[O-]	0.3	no
252	CAS:302-79-4	CC1=C(/C=C/C(C)=C/C=C/C(C)=C/C(=O)O)C(C)(C)CCC1	CAS:68-26-8	CC1=C(/C=C/C(C)=C/C=C/C(C)=C/CO)C(C)(C)CCC1	[*:1]/C=C/C=C(C)/C=C/C1=C(C)CCCC1(C)C.[*:2]C	[*:1]C([*:2])=CC(=O)O>>[*:1]C([*:2])=CCO	0.3	no
253	CAS:302-79-4	CC1=C(/C=C/C(C)=C/C=C/C(C)=C/C(=O)O)C(C)(C)CCC1	CAS:68-26-8	CC1=C(/C=C/C(C)=C/C=C/C(C)=C/CO)C(C)(C)CCC1	[*:1]/C=C/C=C(C)/C=C/C1=C(C)CCCC1(C)C	[*:1]/C(C)=C\C(=O)O>>[*:1]/C(C)=C\CO	0.3	no
254	CAS:302-79-4	CC1=C(/C=C/C(C)=C/C=C/C(C)=C/C(=O)O)C(C)(C)CCC1	CAS:68-26-8	CC1=C(/C=C/C(C)=C/C=C/C(C)=C/CO)C(C)(C)CCC1	[*:1]/C=C(C)/C=C/C1=C(C)CCCC1(C)C.[*:2]C	[*:1]/C=C\C([*:2])=C\C(=O)O>>[*:1]/C=C\C([*:2])=C\CO	0.3	no
255	CAS:302-79-4	CC1=C(/C=C/C(C)=C/C=C/C(C)=C/C(=O)O)C(C)(C)CCC1	CAS:68-26-8	CC1=C(/C=C/C(C)=C/C=C/C(C)=C/CO)C(C)(C)CCC1	[*:1]/C=C(C)/C=C/C=C(C)/C=C/C1=C(C)CCCC1(C)C	[*:1]C(=O)O>>[*:1]CO	0.3	no
256	CAS:4759-48-2	CC1=C(/C=C/C(C)=C/C=C/C(C)=C\C(=O)O)C(C)(C)CCC1	CAS:116-31-4	CC1=C(/C=C/C(C)=C/C=C/C(C)=C/C=O)C(C)(C)CCC1	[*:1]/C=C/C=C(C)/C=C/C1=C(C)CCCC1(C)C.[*:2]C	[*:1]C([*:2])=CC(=O)O>>[*:1]C([*:2])=CC=O	0.3	no
257	CAS:4759-48-2	CC1=C(/C=C/C(C)=C/C=C/C(C)=C\C(=O)O)C(C)(C)CCC1	CAS:116-31-4	CC1=C(/C=C/C(C)=C/C=C/C(C)=C/C=O)C(C)(C)CCC1	[*:1]/C=C(C)/C=C/C1=C(C)CCCC1(C)C.[*:2]C	[*:1]/C=C\C([*:2])=C/C(=O)O>>[*:1]/C=C\C([*:2])=C\C=O	0.3	no
258	CAS:4759-48-2	CC1=C(/C=C/C(C)=C/C=C/C(C)=C\C(=O)O)C(C)(C)CCC1	CAS:116-31-4	CC1=C(/C=C/C(C)=C/C=C/C(C)=C/C=O)C(C)(C)CCC1	[*:1]/C=C/C=C(C)/C=C/C1=C(C)CCCC1(C)C	[*:1]/C(C)=C/C(=O)O>>[*:1]/C(C)=C\C=O	0.3	no
259	CAS:1241-94-7	CCCCC(CC)COP(=O)(Oc1ccccc1)Oc1ccccc1	CID:6528	Cc1ccc(OP(=O)(Oc2ccccc2)Oc2ccccc2)cc1	[*:1]OP(=O)(Oc1ccccc1)Oc1ccccc1	[*:1]CC(CC)CCCC>>[*:1]c1ccc(C)cc1	0.3	no
260	CAS:472-86-6	CC1=C(/C=C/C(C)=C/C=C/C(C)=C\C=O)C(C)(C)CCC1	CAS:116-31-4	CC1=C(/C=C/C(C)=C/C=C/C(C)=C/C=O)C(C)(C)CCC1	[*:1]/C=C(C)/C=C/C1=C(C)CCCC1(C)C	[*:1]/C=C\C(C)=C/C=O>>[*:1]/C=C\C(C)=C\C=O	0.29	no
261	CAS:472-86-6	CC1=C(/C=C/C(C)=C/C=C/C(C)=C\C=O)C(C)(C)CCC1	CAS:116-31-4	CC1=C(/C=C/C(C)=C/C=C/C(C)=C/C=O)C(C)(C)CCC1	[*:2]/C=C/C=C(C)/C=C/C1=C(C)CCCC1(C)C.[*:1]C=O	[*:1]/C=C(/[*:2])C>>[*:1]/C=C(\[*:2])C	0.29	no
262	CAS:472-86-6	CC1=C(/C=C/C(C)=C/C=C/C(C)=C\C=O)C(C)(C)CCC1	CAS:116-31-4	CC1=C(/C=C/C(C)=C/C=C/C(C)=C/C=O)C(C)(C)CCC1	[*:1]/C=C(C)/C=C/C1=C(C)CCCC1(C)C.[*:2]C.[*:3]C=O	[*:1]/C=C\C([*:2])=C/[*:3]>>[*:1]/C=C\C([*:2])=C\[*:3]	0.29	no
263	CAS:116-31-4	CC1=C(/C=C/C(C)=C/C=C/C(C)=C/C=O)C(C)(C)CCC1	CAS:472-86-6	CC1=C(/C=C/C(C)=C/C=C/C(C)=C\C=O)C(C)(C)CCC1	[*:3]/C=C/C1=C(C)CCCC1(C)C.[*:2]C.[*:1]C=O	[*:1]/C=C([*:2])/C=C/C=C(\[*:3])C>>[*:1]/C=C(C)\C=C\C=C([*:2])[*:3]	0.29	no
264	CAS:116-31-4	CC1=C(/C=C/C(C)=C/C=C/C(C)=C/C=O)C(C)(C)CCC1	CAS:472-86-6	CC1=C(/C=C/C(C)=C/C=C/C(C)=C\C=O)C(C)(C)CCC1	[*:3]/C=C/C1=C(C)CCCC1(C)C.[*:2]C.[*:1]C=O	[*:1]/C=C([*:2])/C=C/C=C(\[*:3])C>>[*:1]/C=C([*:2])\C=C\C=C(/[*:3])C	0.29	no
265	CAS:472-86-6	CC1=C(/C=C/C(C)=C/C=C/C(C)=C\C=O)C(C)(C)CCC1	CAS:116-31-4	CC1=C(/C=C/C(C)=C/C=C/C(C)=C/C=O)C(C)(C)CCC1	[*:3]/C=C/C1=C(C)CCCC1(C)C.[*:2]C.[*:1]C=O	[*:1]/C=C([*:2])\C=C\C=C(/[*:3])C>>[*:1]/C=C(C)/C=C/C=C([*:2])[*:3]	0.29	no
266	CAS:116-31-4	CC1=C(/C=C/C(C)=C/C=C/C(C)=C/C=O)C(C)(C)CCC1	CAS:472-86-6	CC1=C(/C=C/C(C)=C/C=C/C(C)=C\C=O)C(C)(C)CCC1	[*:2]/C=C/C1=C(C)CCCC1(C)C.[*:3]C.[*:1]C=O	[*:1]/C=C(C)/C=C/C=C([*:2])[*:3]>>[*:1]/C=C(C)\C=C\C=C([*:2])[*:3]	0.29	no
267	CAS:472-86-6	CC1=C(/C=C/C(C)=C/C=C/C(C)=C\C=O)C(C)(C)CCC1	CAS:116-31-4	CC1=C(/C=C/C(C)=C/C=C/C(C)=C/C=O)C(C)(C)CCC1	[*:1]/C=C(C)/C=C/C1=C(C)CCCC1(C)C.[*:2]C=O	[*:1]/C=C\C(C)=C/[*:2]>>[*:1]/C=C\C(C)=C\[*:2]	0.29	no
268	CAS:472-86-6	CC1=C(/C=C/C(C)=C/C=C/C(C)=C\C=O)C(C)(C)CCC1	CAS:116-31-4	CC1=C(/C=C/C(C)=C/C=C/C(C)=C/C=O)C(C)(C)CCC1	[*:1]/C=C/C=C(C)/C=C/C1=C(C)CCCC1(C)C	[*:1]/C(C)=C/C=O>>[*:1]/C(C)=C\C=O	0.29	no
269	CAS:472-86-6	CC1=C(/C=C/C(C)=C/C=C/C(C)=C\C=O)C(C)(C)CCC1	CAS:116-31-4	CC1=C(/C=C/C(C)=C/C=C/C(C)=C/C=O)C(C)(C)CCC1	[*:1]/C=C(C)/C=C/C1=C(C)CCCC1(C)C.[*:2]C	[*:1]/C=C\C([*:2])=C/C=O>>[*:1]/C=C\C([*:2])=C\C=O	0.29	no
270	CAS:2971-36-0	Oc1ccc(C(c2ccc(O)cc2)C(Cl)(Cl)Cl)cc1	CAS:6898-97-1	CCC(=C(CC)c1ccc(O)cc1)c1ccc(O)cc1	[*:1]c1ccc(O)cc1.[*:2]c1ccc(O)cc1	[*:1]C([*:2])C(Cl)(Cl)Cl>>[*:1]C(CC)=C([*:2])CC	0.28	no
271	CAS:620-40-6	c1ccc(CN(Cc2ccccc2)Cc2ccccc2)cc1	CAS:603-33-8	c1ccc([Bi](c2ccccc2)c2ccccc2)cc1	[*:1]c1ccccc1.[*:2]c1ccccc1.[*:3]c1ccccc1	[*:1]CN(C[*:2])C[*:3]>>[*:1][Bi]([*:2])[*:3]	0.28	no
272	CAS:62-23-7	O=C(O)c1ccc([N+](=O)[O-])cc1	CAS:100-25-4	O=[N+]([O-])c1ccc([N+](=O)[O-])cc1	[*:1]c1ccc([N+](=O)[O-])cc1	[*:1]C(=O)O>>[*:1][N+](=O)[O-]	0.28	no
273	CAS:603-36-1	c1ccc([Sb](c2ccccc2)c2ccccc2)cc1	CAS:791-31-1	O[Si](c1ccccc1)(c1ccccc1)c1ccccc1	[*:1]c1ccccc1.[*:2]c1ccccc1.[*:3]c1ccccc1	[*:1][Sb]([*:2])[*:3]>>[*:1][Si]([*:2])([*:3])O	0.28	no
274	CAS:5300-03-8	CC1=C(/C=C/C(C)=C\C=C\C(C)=C\C(=O)O)C(C)(C)CCC1	CAS:302-79-4	CC1=C(/C=C/C(C)=C/C=C/C(C)=C/C(=O)O)C(C)(C)CCC1	[*:3]/C=C/C1=C(C)CCCC1(C)C.[*:2]C.[*:1]C(=O)O	[*:1]/C=C([*:2])/C=C/C=C(/[*:3])C>>[*:1]/C=C([*:2])/C=C/C=C(\[*:3])C	0.27	no
275	CAS:5300-03-8	CC1=C(/C=C/C(C)=C\C=C\C(C)=C\C(=O)O)C(C)(C)CCC1	CAS:302-79-4	CC1=C(/C=C/C(C)=C/C=C/C(C)=C/C(=O)O)C(C)(C)CCC1	[*:3]/C=C\C(C)=C\C(=O)O.[*:2]C.[*:1]C1=C(C)CCCC1(C)C	[*:1]/C=C\C([*:2])=C/[*:3]>>[*:1]/C=C\C([*:2])=C\[*:3]	0.27	no
276	CAS:5300-03-8	CC1=C(/C=C/C(C)=C\C=C\C(C)=C\C(=O)O)C(C)(C)CCC1	CAS:302-79-4	CC1=C(/C=C/C(C)=C/C=C/C(C)=C/C(=O)O)C(C)(C)CCC1	[*:2]/C=C\C(C)=C\C(=O)O.[*:1]C1=C(C)CCCC1(C)C	[*:1]/C=C\C(C)=C/[*:2]>>[*:1]/C=C\C(C)=C\[*:2]	0.27	no
277	CAS:5300-03-8	CC1=C(/C=C/C(C)=C\C=C\C(C)=C\C(=O)O)C(C)(C)CCC1	CAS:302-79-4	CC1=C(/C=C/C(C)=C/C=C/C(C)=C/C(=O)O)C(C)(C)CCC1	[*:1]/C(C)=C\C(=O)O.[*:2]/C=C/C1=C(C)CCCC1(C)C	[*:1]/C=C/C=C(/[*:2])C>>[*:1]/C=C/C=C(\[*:2])C	0.27	no
278	CAS:5300-03-8	CC1=C(/C=C/C(C)=C\C=C\C(C)=C\C(=O)O)C(C)(C)CCC1	CAS:302-79-4	CC1=C(/C=C/C(C)=C/C=C/C(C)=C/C(=O)O)C(C)(C)CCC1	[*:2]/C=C/C1=C(C)CCCC1(C)C.[*:1]/C=C\C(C)=C\C(=O)O	[*:1]/C=C(/[*:2])C>>[*:1]/C=C(\[*:2])C	0.27	no
279	CAS:5300-03-8	CC1=C(/C=C/C(C)=C\C=C\C(C)=C\C(=O)O)C(C)(C)CCC1	CAS:302-79-4	CC1=C(/C=C/C(C)=C/C=C/C(C)=C/C(=O)O)C(C)(C)CCC1	[*:3]/C=C/C1=C(C)CCCC1(C)C.[*:2]C.[*:1]C(=O)O	[*:1]/C=C([*:2])/C=C/C=C(/[*:3])C>>[*:1]/C=C(C)/C=C/C=C([*:2])[*:3]	0.27	no
280	CAS:5300-03-8	CC1=C(/C=C/C(C)=C\C=C\C(C)=C\C(=O)O)C(C)(C)CCC1	CAS:302-79-4	CC1=C(/C=C/C(C)=C/C=C/C(C)=C/C(=O)O)C(C)(C)CCC1	[*:2]/C(C)=C\C(=O)O.[*:1]C1=C(C)CCCC1(C)C	[*:1]/C=C\C(C)=C/C=C/[*:2]>>[*:1]/C=C\C(C)=C\C=C\[*:2]	0.27	no
281	CAS:5300-03-8	CC1=C(/C=C/C(C)=C\C=C\C(C)=C\C(=O)O)C(C)(C)CCC1	CAS:302-79-4	CC1=C(/C=C/C(C)=C/C=C/C(C)=C/C(=O)O)C(C)(C)CCC1	[*:3]/C(C)=C\C(=O)O.[*:2]C.[*:1]C1=C(C)CCCC1(C)C	[*:1]/C=C\C([*:2])=C/C=C/[*:3]>>[*:1]/C=C\C([*:2])=C\C=C\[*:3]	0.27	no
282	CAS:302-79-4	CC1=C(/C=C/C(C)=C/C=C/C(C)=C/C(=O)O)C(C)(C)CCC1	CAS:5300-03-8	CC1=C(/C=C/C(C)=C\C=C\C(C)=C\C(=O)O)C(C)(C)CCC1	[*:3]/C=C/C1=C(C)CCCC1(C)C.[*:2]C.[*:1]C(=O)O	[*:1]/C=C([*:2])/C=C/C=C(\[*:3])C>>[*:1]/C=C(C)/C=C/C=C([*:2])[*:3]	0.27	no
283	CAS:6898-97-1	CCC(=C(CC)c1ccc(O)cc1)c1ccc(O)cc1	CAS:2664-63-3	Oc1ccc(Sc2ccc(O)cc2)cc1	[*:1]c1ccc(O)cc1.[*:2]c1ccc(O)cc1	[*:1]C(CC)=C([*:2])CC>>[*:1]S[*:2]	0.27	no
284	CAS:1689-82-3	Oc1ccc(/N=N/c2ccccc2)cc1	CAS:103-16-2	Oc1ccc(OCc2ccccc2)cc1	[*:2]c1ccc(O)cc1.[*:1]c1ccccc1	[*:1]/N=N\[*:2]>>[*:1]CO[*:2]	0.27	no
285	CAS:23031-36-9	C#CCC1=C(C)C(OC(=O)C2C(C=C(C)C)C2(C)C)CC1=O	CAS:584-79-2	C=CCC1=C(C)C(OC(=O)C2C(C=C(C)C)C2(C)C)CC1=O	[*:1]C1=C(C)C(OC(=O)C2C(C=C(C)C)C2(C)C)CC1=O	[*:1]CC#C>>[*:1]CC=C	0.26	no
286	CAS:23031-36-9	C#CCC1=C(C)C(OC(=O)C2C(C=C(C)C)C2(C)C)CC1=O	CAS:584-79-2	C=CCC1=C(C)C(OC(=O)C2C(C=C(C)C)C2(C)C)CC1=O	[*:1]CC1=C(C)C(OC(=O)C2C(C=C(C)C)C2(C)C)CC1=O	[*:1]C#C>>[*:1]C=C	0.26	no
287	CAS:77-40-7	CCC(C)(c1ccc(O)cc1)c1ccc(O)cc1	CAS:6807-17-6	CC(C)CC(C)(c1ccc(O)cc1)c1ccc(O)cc1	[*:1]C(C)(c1ccc(O)cc1)c1ccc(O)cc1	[*:1]CC>>[*:1]CC(C)C	0.26	no
288	CAS:77-40-7	CCC(C)(c1ccc(O)cc1)c1ccc(O)cc1	CAS:6807-17-6	CC(C)CC(C)(c1ccc(O)cc1)c1ccc(O)cc1	[*:1]c1ccc(O)cc1.[*:2]c1ccc(O)cc1	[*:1]C([*:2])(C)CC>>[*:1]C([*:2])(C)CC(C)C	0.26	no
289	CAS:77-40-7	CCC(C)(c1ccc(O)cc1)c1ccc(O)cc1	CAS:6807-17-6	CC(C)CC(C)(c1ccc(O)cc1)c1ccc(O)cc1	[*:1]C.[*:2]c1ccc(O)cc1.[*:3]c1ccc(O)cc1	[*:1]C([*:2])([*:3])CC>>[*:1][C@H](C)CC([*:2])([*:3])C	0.26	no
290	CAS:77-40-7	CCC(C)(c1ccc(O)cc1)c1ccc(O)cc1	CAS:6807-17-6	CC(C)CC(C)(c1ccc(O)cc1)c1ccc(O)cc1	[*:1]C.[*:2]c1ccc(O)cc1.[*:3]c1ccc(O)cc1	[*:1]C([*:2])([*:3])CC>>[*:1][C@@H](C)CC([*:2])([*:3])C	0.26	no
291	CAS:77-40-7	CCC(C)(c1ccc(O)cc1)c1ccc(O)cc1	CAS:6807-17-6	CC(C)CC(C)(c1ccc(O)cc1)c1ccc(O)cc1	[*:1]C.[*:2]c1ccc(O)cc1.[*:3]c1ccc(O)cc1	[*:1]C([*:2])([*:3])CC>>[*:1]C(C)CC([*:2])([*:3])C	0.26	no
292	CAS:77-40-7	CCC(C)(c1ccc(O)cc1)c1ccc(O)cc1	CAS:6807-17-6	CC(C)CC(C)(c1ccc(O)cc1)c1ccc(O)cc1	[*:1]C.[*:2]c1ccc(O)cc1.[*:3]c1ccc(O)cc1	[*:1]C([*:2])([*:3])CC>>[*:1]C([*:2])([*:3])CC(C)C	0.26	no
293	CAS:80-06-8	CC(O)(c1ccc(Cl)cc1)c1ccc(Cl)cc1	CAS:5836-10-2	CC(C)OC(=O)C(O)(c1ccc(Cl)cc1)c1ccc(Cl)cc1	[*:1]C.[*:2]c1ccc(Cl)cc1.[*:3]c1ccc(Cl)cc1	[*:1]C([*:2])([*:3])O>>[*:1]C(C)OC(=O)C([*:2])([*:3])O	0.26	no
294	CAS:80-06-8	CC(O)(c1ccc(Cl)cc1)c1ccc(Cl)cc1	CAS:5836-10-2	CC(C)OC(=O)C(O)(c1ccc(Cl)cc1)c1ccc(Cl)cc1	[*:1]C(O)(c1ccc(Cl)cc1)c1ccc(Cl)cc1	[*:1]C>>[*:1]C(=O)OC(C)C	0.26	no
295	CAS:80-06-8	CC(O)(c1ccc(Cl)cc1)c1ccc(Cl)cc1	CAS:5836-10-2	CC(C)OC(=O)C(O)(c1ccc(Cl)cc1)c1ccc(Cl)cc1	[*:1]O.[*:2]c1ccc(Cl)cc1.[*:3]c1ccc(Cl)cc1	[*:1]C([*:2])([*:3])C>>[*:1]C([*:2])([*:3])C(=O)OC(C)C	0.26	no
296	CAS:80-06-8	CC(O)(c1ccc(Cl)cc1)c1ccc(Cl)cc1	CAS:5836-10-2	CC(C)OC(=O)C(O)(c1ccc(Cl)cc1)c1ccc(Cl)cc1	[*:1]C.[*:2]c1ccc(Cl)cc1.[*:3]c1ccc(Cl)cc1	[*:1]C([*:2])([*:3])O>>[*:1][C@H](C)OC(=O)C([*:2])([*:3])O	0.26	no
297	CAS:80-06-8	CC(O)(c1ccc(Cl)cc1)c1ccc(Cl)cc1	CAS:5836-10-2	CC(C)OC(=O)C(O)(c1ccc(Cl)cc1)c1ccc(Cl)cc1	[*:1]C.[*:2]c1ccc(Cl)cc1.[*:3]c1ccc(Cl)cc1	[*:1]C([*:2])([*:3])O>>[*:1][C@@H](C)OC(=O)C([*:2])([*:3])O	0.26	no
298	CAS:80-06-8	CC(O)(c1ccc(Cl)cc1)c1ccc(Cl)cc1	CAS:510-15-6	CCOC(=O)C(O)(c1ccc(Cl)cc1)c1ccc(Cl)cc1	[*:1]c1ccc(Cl)cc1.[*:2]c1ccc(Cl)cc1	[*:1]C([*:2])(C)O>>[*:1]C([*:2])(O)C(=O)OCC	0.23	no
299	CAS:80-06-8	CC(O)(c1ccc(Cl)cc1)c1ccc(Cl)cc1	CAS:510-15-6	CCOC(=O)C(O)(c1ccc(Cl)cc1)c1ccc(Cl)cc1	[*:1]C(O)(c1ccc(Cl)cc1)c1ccc(Cl)cc1	[*:1]C>>[*:1]C(=O)OCC	0.23	no
300	CAS:80-06-8	CC(O)(c1ccc(Cl)cc1)c1ccc(Cl)cc1	CAS:510-15-6	CCOC(=O)C(O)(c1ccc(Cl)cc1)c1ccc(Cl)cc1	[*:1]O.[*:2]c1ccc(Cl)cc1.[*:3]c1ccc(Cl)cc1	[*:1]C([*:2])([*:3])C>>[*:1]C([*:2])([*:3])C(=O)OCC	0.23	no
301	CAS:80-06-8	CC(O)(c1ccc(Cl)cc1)c1ccc(Cl)cc1	CAS:17781-31-6	OC(c1ccc(Cl)cc1)(c1ccc(Cl)cc1)c1cccnc1	[*:1]O.[*:2]c1ccc(Cl)cc1.[*:3]c1ccc(Cl)cc1	[*:1]C([*:2])([*:3])C>>[*:1]C([*:2])([*:3])c1cccnc1	0.23	no
302	CAS:80-06-8	CC(O)(c1ccc(Cl)cc1)c1ccc(Cl)cc1	CAS:17781-31-6	OC(c1ccc(Cl)cc1)(c1ccc(Cl)cc1)c1cccnc1	[*:1]C(O)(c1ccc(Cl)cc1)c1ccc(Cl)cc1	[*:1]C>>[*:1]c1cccnc1	0.23	no
303	CAS:3735-85-1	COC(=O)[CH]1[CH]2C[CH]3c4[nH]c5cc(OC)ccc5c4CCN3C[CH]2C[CH](OC(=O)COc2ccc(OC)cc2)[CH]1OC	CAS:50-55-5	COC(=O)[CH]1[CH]2C[CH]3c4[nH]c5cc(OC)ccc5c4CCN3C[CH]2C[CH](OC(=O)c2cc(OC)c(OC)c(OC)c2)[CH]1OC	[*:1]C1CC2CN3CCc4c([nH]c5cc(OC)ccc45)C3CC2C(C(=O)OC)C1OC.[*:2]OC	[*:1]OC(=O)COc1ccc([*:2])cc1>>[*:1]OC(=O)c1cc([*:2])c(OC)c(OC)c1	0.23	no
304	CAS:3735-85-1	COC(=O)[CH]1[CH]2C[CH]3c4[nH]c5cc(OC)ccc5c4CCN3C[CH]2C[CH](OC(=O)COc2ccc(OC)cc2)[CH]1OC	CAS:50-55-5	COC(=O)[CH]1[CH]2C[CH]3c4[nH]c5cc(OC)ccc5c4CCN3C[CH]2C[CH](OC(=O)c2cc(OC)c(OC)c(OC)c2)[CH]1OC	[*:2]C.[*:1]C(=O)OC1CC2CN3CCc4c([nH]c5cc(OC)ccc45)C3CC2C(C(=O)OC)C1OC	[*:1]COc1ccc(O[*:2])cc1>>[*:2]Oc1cc([*:1])cc(OC)c1OC	0.23	no
305	CAS:3735-85-1	COC(=O)[CH]1[CH]2C[CH]3c4[nH]c5cc(OC)ccc5c4CCN3C[CH]2C[CH](OC(=O)COc2ccc(OC)cc2)[CH]1OC	CAS:50-55-5	COC(=O)[CH]1[CH]2C[CH]3c4[nH]c5cc(OC)ccc5c4CCN3C[CH]2C[CH](OC(=O)c2cc(OC)c(OC)c(OC)c2)[CH]1OC	[*:1]C(=O)OC1CC2CN3CCc4c([nH]c5cc(OC)ccc45)C3CC2C(C(=O)OC)C1OC	[*:1]COc1ccc(OC)cc1>>[*:1]c1cc(OC)c(OC)c(OC)c1	0.23	no
306	CAS:3735-85-1	COC(=O)[CH]1[CH]2C[CH]3c4[nH]c5cc(OC)ccc5c4CCN3C[CH]2C[CH](OC(=O)COc2ccc(OC)cc2)[CH]1OC	CAS:50-55-5	COC(=O)[CH]1[CH]2C[CH]3c4[nH]c5cc(OC)ccc5c4CCN3C[CH]2C[CH](OC(=O)c2cc(OC)c(OC)c(OC)c2)[CH]1OC	[*:1]C(=O)OC1CC2CN3CCc4c([nH]c5cc(OC)ccc45)C3CC2C(C(=O)OC)C1OC.[*:2]OC	[*:1]COc1ccc([*:2])cc1>>[*:1]c1cc([*:2])c(OC)c(OC)c1	0.23	no
307	CAS:3735-85-1	COC(=O)[CH]1[CH]2C[CH]3c4[nH]c5cc(OC)ccc5c4CCN3C[CH]2C[CH](OC(=O)COc2ccc(OC)cc2)[CH]1OC	CAS:50-55-5	COC(=O)[CH]1[CH]2C[CH]3c4[nH]c5cc(OC)ccc5c4CCN3C[CH]2C[CH](OC(=O)c2cc(OC)c(OC)c(OC)c2)[CH]1OC	[*:2]C.[*:1]C(=O)OC1CC2CN3CCc4c([nH]c5cc(OC)ccc45)C3CC2C(C(=O)OC)C1OC	[*:1]COc1ccc(O[*:2])cc1>>[*:2]Oc1c(OC)cc([*:1])cc1OC	0.23	no
308	CAS:3735-85-1	COC(=O)[CH]1[CH]2C[CH]3c4[nH]c5cc(OC)ccc5c4CCN3C[CH]2C[CH](OC(=O)COc2ccc(OC)cc2)[CH]1OC	CAS:50-55-5	COC(=O)[CH]1[CH]2C[CH]3c4[nH]c5cc(OC)ccc5c4CCN3C[CH]2C[CH](OC(=O)c2cc(OC)c(OC)c(OC)c2)[CH]1OC	[*:1]C1CC2CN3CCc4c([nH]c5cc(OC)ccc45)C3CC2C(C(=O)OC)C1OC.[*:2]OC	[*:1]OC(=O)COc1ccc([*:2])cc1>>[*:1]OC(=O)c1cc(OC)c([*:2])c(OC)c1	0.23	no
309	CAS:3735-85-1	COC(=O)[CH]1[CH]2C[CH]3c4[nH]c5cc(OC)ccc5c4CCN3C[CH]2C[CH](OC(=O)COc2ccc(OC)cc2)[CH]1OC	CAS:50-55-5	COC(=O)[CH]1[CH]2C[CH]3c4[nH]c5cc(OC)ccc5c4CCN3C[CH]2C[CH](OC(=O)c2cc(OC)c(OC)c(OC)c2)[CH]1OC	[*:1]C(=O)OC1CC2CN3CCc4c([nH]c5cc(OC)ccc45)C3CC2C(C(=O)OC)C1OC.[*:2]OC	[*:1]COc1ccc([*:2])cc1>>[*:1]c1cc(OC)c([*:2])c(OC)c1	0.23	no
310	CAS:599-64-4	CC(C)(c1ccccc1)c1ccc(O)cc1	CAS:103-16-2	Oc1ccc(OCc2ccccc2)cc1	[*:2]c1ccc(O)cc1.[*:1]c1ccccc1	[*:1]C([*:2])(C)C>>[*:1]CO[*:2]	0.22	no
311	CAS:6807-17-6	CC(C)CC(C)(c1ccc(O)cc1)c1ccc(O)cc1	CAS:6898-97-1	CCC(=C(CC)c1ccc(O)cc1)c1ccc(O)cc1	[*:1]c1ccc(O)cc1.[*:2]c1ccc(O)cc1	[*:1]C([*:2])(C)CC(C)C>>[*:1]C(CC)=C([*:2])CC	0.22	no
312	CAS:620-40-6	c1ccc(CN(Cc2ccccc2)Cc2ccccc2)cc1	CAS:115-86-6	O=P(Oc1ccccc1)(Oc1ccccc1)Oc1ccccc1	[*:1]c1ccccc1.[*:2]c1ccccc1.[*:3]c1ccccc1	[*:1]CN(C[*:2])C[*:3]>>[*:1]OP(=O)(O[*:2])O[*:3]	0.22	no
313	CAS:789-02-6	Clc1ccc(C(c2ccccc2Cl)C(Cl)(Cl)Cl)cc1	CAS:53-19-0	Clc1ccc(C(c2ccccc2Cl)C(Cl)Cl)cc1	[*:1]C(c1ccc(Cl)cc1)c1ccccc1Cl.[*:2]Cl.[*:3]Cl	[*:1]C([*:2])([*:3])Cl>>[*:1]C([*:2])[*:3]	0.21	no
314	CAS:789-02-6	Clc1ccc(C(c2ccccc2Cl)C(Cl)(Cl)Cl)cc1	CAS:53-19-0	Clc1ccc(C(c2ccccc2Cl)C(Cl)Cl)cc1	[*:1]c1ccc(Cl)cc1.[*:2]c1ccccc1Cl	[*:1]C([*:2])C(Cl)(Cl)Cl>>[*:1]C([*:2])C(Cl)Cl	0.21	no
315	CAS:789-02-6	Clc1ccc(C(c2ccccc2Cl)C(Cl)(Cl)Cl)cc1	CAS:53-19-0	Clc1ccc(C(c2ccccc2Cl)C(Cl)Cl)cc1	[*:3]Cl.[*:1]c1ccc(Cl)cc1.[*:2]c1ccccc1Cl	[*:1]C([*:2])C([*:3])(Cl)Cl>>[*:1]C([*:2])[C@H]([*:3])Cl	0.21	no
316	CAS:789-02-6	Clc1ccc(C(c2ccccc2Cl)C(Cl)(Cl)Cl)cc1	CAS:53-19-0	Clc1ccc(C(c2ccccc2Cl)C(Cl)Cl)cc1	[*:1]C(Cl)(Cl)C(c1ccc(Cl)cc1)c1ccccc1Cl	[*:1]Cl>>[*:1][H]	0.21	no
317	CAS:789-02-6	Clc1ccc(C(c2ccccc2Cl)C(Cl)(Cl)Cl)cc1	CAS:53-19-0	Clc1ccc(C(c2ccccc2Cl)C(Cl)Cl)cc1	[*:3]Cl.[*:1]c1ccc(Cl)cc1.[*:2]c1ccccc1Cl	[*:1]C([*:2])C([*:3])(Cl)Cl>>[*:1]C([*:2])[C@@H]([*:3])Cl	0.21	no
318	CAS:789-02-6	Clc1ccc(C(c2ccccc2Cl)C(Cl)(Cl)Cl)cc1	CAS:53-19-0	Clc1ccc(C(c2ccccc2Cl)C(Cl)Cl)cc1	[*:3]Cl.[*:1]c1ccc(Cl)cc1.[*:2]c1ccccc1Cl	[*:1]C([*:2])C([*:3])(Cl)Cl>>[*:1]C([*:2])C([*:3])Cl	0.21	no
319	CAS:789-02-6	Clc1ccc(C(c2ccccc2Cl)C(Cl)(Cl)Cl)cc1	CAS:53-19-0	Clc1ccc(C(c2ccccc2Cl)C(Cl)Cl)cc1	[*:1]C(c1ccc(Cl)cc1)c1ccccc1Cl	[*:1]C(Cl)(Cl)Cl>>[*:1]C(Cl)Cl	0.21	no
320	CAS:789-02-6	Clc1ccc(C(c2ccccc2Cl)C(Cl)(Cl)Cl)cc1	CAS:53-19-0	Clc1ccc(C(c2ccccc2Cl)C(Cl)Cl)cc1	[*:1]C(c1ccc(Cl)cc1)c1ccccc1Cl.[*:2]Cl	[*:1]C([*:2])(Cl)Cl>>[*:1]C([*:2])Cl	0.21	no
321	CAS:315-18-4	CNC(=O)Oc1cc(C)c(N(C)C)c(C)c1	CAS:2032-65-7	CNC(=O)Oc1cc(C)c(SC)c(C)c1	[*:1]c1c(C)cc(OC(=O)NC)cc1C	[*:1]N(C)C>>[*:1]SC	0.21	no
322	CAS:315-18-4	CNC(=O)Oc1cc(C)c(N(C)C)c(C)c1	CAS:2032-65-7	CNC(=O)Oc1cc(C)c(SC)c(C)c1	[*:1]C.[*:2]c1c(C)cc(OC(=O)NC)cc1C	[*:1]N([*:2])C>>[*:1]S[*:2]	0.21	no
323	CAS:77-40-7	CCC(C)(c1ccc(O)cc1)c1ccc(O)cc1	CAS:2664-63-3	Oc1ccc(Sc2ccc(O)cc2)cc1	[*:1]c1ccc(O)cc1.[*:2]c1ccc(O)cc1	[*:1]C([*:2])(C)CC>>[*:1]S[*:2]	0.21	no
324	CAS:17540-75-9	CCC(C)c1cc(C(C)(C)C)c(O)c(C(C)(C)C)c1	CAS:489-01-0	COc1cc(C(C)(C)C)c(O)c(C(C)(C)C)c1	[*:1]C.[*:2]c1cc(C(C)(C)C)c(O)c(C(C)(C)C)c1	[*:1]C([*:2])CC>>[*:1]O[*:2]	0.21	no
325	CAS:17540-75-9	CCC(C)c1cc(C(C)(C)C)c(O)c(C(C)(C)C)c1	CAS:489-01-0	COc1cc(C(C)(C)C)c(O)c(C(C)(C)C)c1	[*:1]c1cc(C(C)(C)C)c(O)c(C(C)(C)C)c1	[*:1]C(C)CC>>[*:1]OC	0.21	no
326	CAS:97-00-7	O=[N+]([O-])c1ccc(Cl)c([N+](=O)[O-])c1	CAS:1594-56-5	N#CSc1ccc([N+](=O)[O-])cc1[N+](=O)[O-]	[*:1]c1ccc([N+](=O)[O-])cc1[N+](=O)[O-]	[*:1]Cl>>[*:1]SC#N	0.21	no
327	CAS:53-96-3	CC(=O)Nc1ccc2c(c1)Cc1ccccc1-2	CAS:2443-58-5	Oc1ccc2c(c1)Cc1ccccc1-2	[*:1]c1ccc2c(c1)Cc1ccccc1-2	[*:1]NC(C)=O>>[*:1]O	0.21	no
328	CAS:77-40-7	CCC(C)(c1ccc(O)cc1)c1ccc(O)cc1	CAS:2971-36-0	Oc1ccc(C(c2ccc(O)cc2)C(Cl)(Cl)Cl)cc1	[*:1]c1ccc(O)cc1.[*:2]c1ccc(O)cc1	[*:1]C([*:2])(C)CC>>[*:1]C([*:2])C(Cl)(Cl)Cl	0.2	no
329	CAS:4945-47-5	CN1CCC(N(Cc2ccccc2)c2ccccc2)CC1	CAS:59-96-1	CC(COc1ccccc1)N(CCCl)Cc1ccccc1	[*:1]C.[*:3]Cc1ccccc1.[*:2]c1ccccc1	[*:1]N1CCC(N([*:2])[*:3])CC1>>[*:2]OCC([*:1])N([*:3])CCCl	0.2	no
330	CAS:639-58-7	Cl[Sn](c1ccccc1)(c1ccccc1)c1ccccc1	CAS:76-87-9	O[Sn](c1ccccc1)(c1ccccc1)c1ccccc1	[*:1]c1ccccc1.[*:2]c1ccccc1.[*:3]c1ccccc1	[*:1][Sn]([*:2])([*:3])Cl>>[*:1][Sn]([*:2])([*:3])O	0.2	no
331	CAS:56-53-1	CC/C(=C(/CC)c1ccc(O)cc1)c1ccc(O)cc1	CAS:6807-17-6	CC(C)CC(C)(c1ccc(O)cc1)c1ccc(O)cc1	[*:1]c1ccc(O)cc1.[*:2]c1ccc(O)cc1	[*:1]/C(CC)=C(/[*:2])CC>>[*:1]C([*:2])(C)CC(C)C	0.19	no
332	CAS:77-40-7	CCC(C)(c1ccc(O)cc1)c1ccc(O)cc1	CAS:27955-94-8	CC(c1ccc(O)cc1)(c1ccc(O)cc1)c1ccc(O)cc1	[*:1]C(C)(c1ccc(O)cc1)c1ccc(O)cc1	[*:1]CC>>[*:1]c1ccc(O)cc1	0.19	no
333	CAS:80-05-7	CC(C)(c1ccc(O)cc1)c1ccc(O)cc1	CAS:6807-17-6	CC(C)CC(C)(c1ccc(O)cc1)c1ccc(O)cc1	[*:1]C(C)(c1ccc(O)cc1)c1ccc(O)cc1	[*:1]C>>[*:1]CC(C)C	0.18	no
334	CAS:80-05-7	CC(C)(c1ccc(O)cc1)c1ccc(O)cc1	CAS:6807-17-6	CC(C)CC(C)(c1ccc(O)cc1)c1ccc(O)cc1	[*:1]c1ccc(O)cc1.[*:2]c1ccc(O)cc1	[*:1]C([*:2])(C)C>>[*:1]C([*:2])(C)CC(C)C	0.18	no
335	CAS:6807-17-6	CC(C)CC(C)(c1ccc(O)cc1)c1ccc(O)cc1	CAS:80-05-7	CC(C)(c1ccc(O)cc1)c1ccc(O)cc1	[*:1]CC(C)(c1ccc(O)cc1)c1ccc(O)cc1	[*:1]C(C)C>>[*:1][H]	0.18	no
336	CAS:80-05-7	CC(C)(c1ccc(O)cc1)c1ccc(O)cc1	CAS:6807-17-6	CC(C)CC(C)(c1ccc(O)cc1)c1ccc(O)cc1	[*:1]C.[*:2]c1ccc(O)cc1.[*:3]c1ccc(O)cc1	[*:1]C([*:2])([*:3])C>>[*:1]C([*:2])([*:3])CC(C)C	0.18	no
337	CAS:80-05-7	CC(C)(c1ccc(O)cc1)c1ccc(O)cc1	CAS:6807-17-6	CC(C)CC(C)(c1ccc(O)cc1)c1ccc(O)cc1	[*:1]C.[*:2]c1ccc(O)cc1.[*:3]c1ccc(O)cc1	[*:1]C([*:2])([*:3])C>>[*:1]C(C)CC([*:2])([*:3])C	0.18	no
338	CAS:80-05-7	CC(C)(c1ccc(O)cc1)c1ccc(O)cc1	CAS:6807-17-6	CC(C)CC(C)(c1ccc(O)cc1)c1ccc(O)cc1	[*:1]C.[*:2]c1ccc(O)cc1.[*:3]c1ccc(O)cc1	[*:1]C([*:2])([*:3])C>>[*:1][C@@H](C)CC([*:2])([*:3])C	0.18	no
339	CAS:80-05-7	CC(C)(c1ccc(O)cc1)c1ccc(O)cc1	CAS:6807-17-6	CC(C)CC(C)(c1ccc(O)cc1)c1ccc(O)cc1	[*:1]C.[*:2]c1ccc(O)cc1.[*:3]c1ccc(O)cc1	[*:1]C([*:2])([*:3])C>>[*:1][C@H](C)CC([*:2])([*:3])C	0.18	no
340	CAS:639-58-7	Cl[Sn](c1ccccc1)(c1ccccc1)c1ccccc1	CAS:379-52-2	F[Sn](c1ccccc1)(c1ccccc1)c1ccccc1	[*:1]c1ccccc1.[*:2]c1ccccc1.[*:3]c1ccccc1	[*:1][Sn]([*:2])([*:3])Cl>>[*:1][Sn]([*:2])([*:3])F	0.17	no
341	CAS:63675-72-9	COC(=O)C1=C(C)NC(C)=C(C(=O)OCC(C)C)C1c1ccccc1[N+](=O)[O-]	CAS:21829-25-4	COC(=O)C1=C(C)NC(C)=C(C(=O)OC)C1c1ccccc1[N+](=O)[O-]	[*:2]C.[*:1]C1=C(C)NC(C)=C(C(=O)OC)C1c1ccccc1[N+](=O)[O-]	[*:1]C(=O)OC[C@H]([*:2])C>>[*:2]OC([*:1])=O	0.17	no
342	CAS:21829-25-4	COC(=O)C1=C(C)NC(C)=C(C(=O)OC)C1c1ccccc1[N+](=O)[O-]	CAS:63675-72-9	COC(=O)C1=C(C)NC(C)=C(C(=O)OCC(C)C)C1c1ccccc1[N+](=O)[O-]	[*:1]OC(=O)C1=C(C)NC(C)=C(C(=O)OC)C1c1ccccc1[N+](=O)[O-]	[*:1]C>>[*:1]CC(C)C	0.17	no
343	CAS:21829-25-4	COC(=O)C1=C(C)NC(C)=C(C(=O)OC)C1c1ccccc1[N+](=O)[O-]	CAS:63675-72-9	COC(=O)C1=C(C)NC(C)=C(C(=O)OCC(C)C)C1c1ccccc1[N+](=O)[O-]	[*:1]C1=C(C)NC(C)=C(C(=O)OC)C1c1ccccc1[N+](=O)[O-]	[*:1]C(=O)OC>>[*:1]C(=O)OCC(C)C	0.17	no
344	CAS:63675-72-9	COC(=O)C1=C(C)NC(C)=C(C(=O)OCC(C)C)C1c1ccccc1[N+](=O)[O-]	CAS:21829-25-4	COC(=O)C1=C(C)NC(C)=C(C(=O)OC)C1c1ccccc1[N+](=O)[O-]	[*:2]C.[*:1]C1=C(C)NC(C)=C(C(=O)OC)C1c1ccccc1[N+](=O)[O-]	[*:1]C(=O)OCC([*:2])C>>[*:2]OC([*:1])=O	0.17	no
345	CAS:63675-72-9	COC(=O)C1=C(C)NC(C)=C(C(=O)OCC(C)C)C1c1ccccc1[N+](=O)[O-]	CAS:21829-25-4	COC(=O)C1=C(C)NC(C)=C(C(=O)OC)C1c1ccccc1[N+](=O)[O-]	[*:1]COC(=O)C1=C(C)NC(C)=C(C(=O)OC)C1c1ccccc1[N+](=O)[O-]	[*:1]C(C)C>>[*:1][H]	0.17	no
346	CAS:63675-72-9	COC(=O)C1=C(C)NC(C)=C(C(=O)OCC(C)C)C1c1ccccc1[N+](=O)[O-]	CAS:21829-25-4	COC(=O)C1=C(C)NC(C)=C(C(=O)OC)C1c1ccccc1[N+](=O)[O-]	[*:2]C.[*:1]C1=C(C)NC(C)=C(C(=O)OC)C1c1ccccc1[N+](=O)[O-]	[*:1]C(=O)OC[C@@H]([*:2])C>>[*:2]OC([*:1])=O	0.17	no
347	CAS:731-27-1	Cc1ccc(N(SC(F)(Cl)Cl)S(=O)(=O)N(C)C)cc1	CAS:1085-98-9	CN(C)S(=O)(=O)N(SC(F)(Cl)Cl)c1ccccc1	[*:1]c1ccc(N(SC(F)(Cl)Cl)S(=O)(=O)N(C)C)cc1	[*:1]C>>[*:1][H]	0.16	no
348	CAS:77-40-7	CCC(C)(c1ccc(O)cc1)c1ccc(O)cc1	CAS:843-55-0	Oc1ccc(C2(c3ccc(O)cc3)CCCCC2)cc1	[*:1]c1ccc(O)cc1.[*:2]c1ccc(O)cc1	[*:1]C([*:2])(C)CC>>[*:1]C1([*:2])CCCCC1	0.16	no
349	CAS:77-40-7	CCC(C)(c1ccc(O)cc1)c1ccc(O)cc1	CAS:1571-75-1	CC(c1ccccc1)(c1ccc(O)cc1)c1ccc(O)cc1	[*:1]C(C)(c1ccc(O)cc1)c1ccc(O)cc1	[*:1]CC>>[*:1]c1ccccc1	0.16	no
350	CAS:77-40-7	CCC(C)(c1ccc(O)cc1)c1ccc(O)cc1	CAS:1571-75-1	CC(c1ccccc1)(c1ccc(O)cc1)c1ccc(O)cc1	[*:1]C.[*:2]c1ccc(O)cc1.[*:3]c1ccc(O)cc1	[*:1]C([*:2])([*:3])CC>>[*:1]C([*:2])([*:3])c1ccccc1	0.16	no
351	CAS:60125-24-8	COc1ccccc1/C=C/C=O	CAS:1504-74-1	COc1ccccc1C=CC=O	[*:1]c1ccccc1OC	[*:1]/C=C\C=O>>[*:1]C=CC=O	0.15	no
352	CAS:60125-24-8	COc1ccccc1/C=C/C=O	CAS:1504-74-1	COc1ccccc1C=CC=O	[*:1]C=O.[*:2]c1ccccc1OC	[*:1]/C=C\[*:2]>>[*:1]C=C[*:2]	0.15	no
353	CAS:1879-09-0	Cc1cc(C)c(O)c(C(C)(C)C)c1	CAS:128-37-0	Cc1cc(C(C)(C)C)c(O)c(C(C)(C)C)c1	[*:1]c1cc(C)cc(C(C)(C)C)c1O	[*:1]C>>[*:1]C(C)(C)C	0.15	no
354	CAS:77-40-7	CCC(C)(c1ccc(O)cc1)c1ccc(O)cc1	CAS:14868-03-2	Oc1ccc(C(=C(Cl)Cl)c2ccc(O)cc2)cc1	[*:1]c1ccc(O)cc1.[*:2]c1ccc(O)cc1	[*:1]C([*:2])(C)CC>>[*:1]C([*:2])=C(Cl)Cl	0.15	no
355	CAS:107534-96-3	CC(C)(C)C(O)(CCc1ccc(Cl)cc1)Cn1cncn1	CAS:43121-43-3	CC(C)(C)C(=O)C(Oc1ccc(Cl)cc1)n1cncn1	[*:2]C(C)(C)C.[*:1]c1ccc(Cl)cc1.[*:3]n1cncn1	[*:1]CCC([*:2])(O)C[*:3]>>[*:1]OC([*:3])C([*:2])=O	0.15	no
356	CAS:56-53-1	CC/C(=C(/CC)c1ccc(O)cc1)c1ccc(O)cc1	CAS:2664-63-3	Oc1ccc(Sc2ccc(O)cc2)cc1	[*:1]c1ccc(O)cc1.[*:2]c1ccc(O)cc1	[*:1]/C(CC)=C(/[*:2])CC>>[*:1]S[*:2]	0.14	no
357	CAS:2648-61-5	O=C(c1ccccc1)C(Cl)Cl	CAS:70-11-1	O=C(CBr)c1ccccc1	[*:1]C(=O)c1ccccc1	[*:1]C(Cl)Cl>>[*:1]CBr	0.14	no
358	CAS:122-78-1	O=CCc1ccccc1	CAS:104-53-0	O=CCCc1ccccc1	[*:1]C=O.[*:2]c1ccccc1	[*:1]C[*:2]>>[*:1]CC[*:2]	0.14	no
359	CID:158333	CC(C)(C)c1ccccc1OP(=O)(Oc1ccccc1)Oc1ccccc1	CAS:115-86-6	O=P(Oc1ccccc1)(Oc1ccccc1)Oc1ccccc1	[*:1]c1ccccc1OP(=O)(Oc1ccccc1)Oc1ccccc1	[*:1]C(C)(C)C>>[*:1][H]	0.13	no
360	CAS:80-05-7	CC(C)(c1ccc(O)cc1)c1ccc(O)cc1	CAS:2664-63-3	Oc1ccc(Sc2ccc(O)cc2)cc1	[*:1]c1ccc(O)cc1.[*:2]c1ccc(O)cc1	[*:1]C([*:2])(C)C>>[*:1]S[*:2]	0.13	no
361	CAS:56-53-1	CC/C(=C(/CC)c1ccc(O)cc1)c1ccc(O)cc1	CAS:2971-36-0	Oc1ccc(C(c2ccc(O)cc2)C(Cl)(Cl)Cl)cc1	[*:1]c1ccc(O)cc1.[*:2]c1ccc(O)cc1	[*:1]/C(CC)=C(/[*:2])CC>>[*:1]C([*:2])C(Cl)(Cl)Cl	0.13	no
362	CAS:80-05-7	CC(C)(c1ccc(O)cc1)c1ccc(O)cc1	CAS:2971-36-0	Oc1ccc(C(c2ccc(O)cc2)C(Cl)(Cl)Cl)cc1	[*:1]c1ccc(O)cc1.[*:2]c1ccc(O)cc1	[*:1]C([*:2])(C)C>>[*:1]C([*:2])C(Cl)(Cl)Cl	0.12	no
363	CAS:128-37-0	Cc1cc(C(C)(C)C)c(O)c(C(C)(C)C)c1	CAS:17540-75-9	CCC(C)c1cc(C(C)(C)C)c(O)c(C(C)(C)C)c1	[*:1]c1cc(C(C)(C)C)c(O)c(C(C)(C)C)c1	[*:1]C>>[*:1]C(C)CC	0.12	no
364	CAS:62-38-4	CC(=O)O[Hg]c1ccccc1	CAS:122-64-5	CC(O)C(=O)O[Hg]c1ccccc1	[*:1]C(=O)O[Hg]c1ccccc1	[*:1]C>>[*:1]C(C)O	0.12	no
365	CAS:38083-17-9	CC(C)(C)C(=O)C(Oc1ccc(Cl)cc1)n1ccnc1	CAS:43121-43-3	CC(C)(C)C(=O)C(Oc1ccc(Cl)cc1)n1cncn1	[*:1]C(=O)C(C)(C)C.[*:2]Oc1ccc(Cl)cc1	[*:1]C([*:2])n1ccnc1>>[*:1]C([*:2])n1cncn1	0.12	no
366	CAS:38083-17-9	CC(C)(C)C(=O)C(Oc1ccc(Cl)cc1)n1ccnc1	CAS:43121-43-3	CC(C)(C)C(=O)C(Oc1ccc(Cl)cc1)n1cncn1	[*:1]C(Oc1ccc(Cl)cc1)C(=O)C(C)(C)C	[*:1]n1ccnc1>>[*:1]n1cncn1	0.12	no
367	CAS:80-05-7	CC(C)(c1ccc(O)cc1)c1ccc(O)cc1	CAS:599-64-4	CC(C)(c1ccccc1)c1ccc(O)cc1	[*:1]c1ccc(C(C)(C)c2ccc(O)cc2)cc1	[*:1]O>>[*:1][H]	0.12	no
368	CAS:80-15-9	CC(C)(OO)c1ccccc1	CAS:3027-21-2	CO[Si](C)(OC)c1ccccc1	[*:1]C.[*:2]C.[*:3]c1ccccc1	[*:1]C([*:2])([*:3])OO>>[*:1]O[Si]([*:2])([*:3])OC	0.12	no
369	CAS:80-15-9	CC(C)(OO)c1ccccc1	CAS:3027-21-2	CO[Si](C)(OC)c1ccccc1	[*:1]C.[*:3]C.[*:2]c1ccccc1	[*:1]C([*:2])([*:3])OO>>[*:1]O[Si]([*:2])(C)O[*:3]	0.12	no
370	CAS:29091-21-2	CCCN(CCC)c1c([N+](=O)[O-])cc(C(F)(F)F)c(N)c1[N+](=O)[O-]	CAS:1582-09-8	CCCN(CCC)c1c([N+](=O)[O-])cc(C(F)(F)F)cc1[N+](=O)[O-]	[*:1]c1c(C(F)(F)F)cc([N+](=O)[O-])c(N(CCC)CCC)c1[N+](=O)[O-]	[*:1]N>>[*:1][H]	0.12	no
371	CAS:1879-09-0	Cc1cc(C)c(O)c(C(C)(C)C)c1	CAS:2219-82-1	Cc1cccc(C(C)(C)C)c1O	[*:1]c1cc(C)c(O)c(C(C)(C)C)c1	[*:1]C>>[*:1][H]	0.12	no
372	CAS:72-33-3	C#C[C]1(O)CC[CH]2[CH]3CCc4cc(OC)ccc4[CH]3CC[C]21C	CAS:57-63-6	C#C[C]1(O)CC[CH]2[CH]3CCc4cc(O)ccc4[CH]3CC[C]21C	[*:1]Oc1ccc2c(c1)CCC1C2CCC2(C)C1CCC2(O)C#C	[*:1]C>>[*:1][H]	0.12	no
373	CAS:57-63-6	C#C[C]1(O)CC[CH]2[CH]3CCc4cc(O)ccc4[CH]3CC[C]21C	CAS:72-33-3	C#C[C]1(O)CC[CH]2[CH]3CCc4cc(OC)ccc4[CH]3CC[C]21C	[*:1]c1ccc2c(c1)CCC1C2CCC2(C)C1CCC2(O)C#C	[*:1]O>>[*:1]OC	0.12	no
374	CAS:80-05-7	CC(C)(c1ccc(O)cc1)c1ccc(O)cc1	CAS:27955-94-8	CC(c1ccc(O)cc1)(c1ccc(O)cc1)c1ccc(O)cc1	[*:1]C(C)(c1ccc(O)cc1)c1ccc(O)cc1	[*:1]C>>[*:1]c1ccc(O)cc1	0.11	no
375	CAS:50-14-6	C=C1CC[CH](O)C/C1=C/C=C1\CCC[C]2(C)[CH]([CH](C)/C=C/[CH](C)C(C)C)CC[CH]12	CAS:67-97-0	C=C1CC[CH](O)C/C1=C/C=C1\CCC[C]2(C)[CH]([CH](C)CCCC(C)C)CC[CH]12	[*:1]C.[*:3]C.[*:2]C1CCC2/C(=C/C=C3/CC(O)CCC3=C)CCCC12C	[*:1]C([*:2])/C=C/C(C)C([*:3])C>>[*:1]C([*:3])CCCC([*:2])C	0.11	no
376	CAS:50-14-6	C=C1CC[CH](O)C/C1=C/C=C1\CCC[C]2(C)[CH]([CH](C)/C=C/[CH](C)C(C)C)CC[CH]12	CAS:67-97-0	C=C1CC[CH](O)C/C1=C/C=C1\CCC[C]2(C)[CH]([CH](C)CCCC(C)C)CC[CH]12	[*:1]C(C)C.[*:2]C1CCC2/C(=C/C=C3/CC(O)CCC3=C)CCCC12C	[*:1]C(C)/C=C/C([*:2])C>>[*:1]CCCC([*:2])C	0.11	no
377	CAS:50-14-6	C=C1CC[CH](O)C/C1=C/C=C1\CCC[C]2(C)[CH]([CH](C)/C=C/[CH](C)C(C)C)CC[CH]12	CAS:67-97-0	C=C1CC[CH](O)C/C1=C/C=C1\CCC[C]2(C)[CH]([CH](C)CCCC(C)C)CC[CH]12	[*:2]C(C)C.[*:1]C(C)C1CCC2/C(=C/C=C3/CC(O)CCC3=C)CCCC21C	[*:1]/C=C\C([*:2])C>>[*:1]CCC[*:2]	0.11	no
378	CAS:67-97-0	C=C1CC[CH](O)C/C1=C/C=C1\CCC[C]2(C)[CH]([CH](C)CCCC(C)C)CC[CH]12	CAS:50-14-6	C=C1CC[CH](O)C/C1=C/C=C1\CCC[C]2(C)[CH]([CH](C)/C=C/[CH](C)C(C)C)CC[CH]12	[*:2]C.[*:3]C.[*:1]C1CCC2/C(=C/C=C3/CC(O)CCC3=C)CCCC12C	[*:1]C([*:2])CCC[C@@H]([*:3])C>>[*:1]C(C)/C=C/C([*:2])C([*:3])C	0.11	no
379	CAS:50-14-6	C=C1CC[CH](O)C/C1=C/C=C1\CCC[C]2(C)[CH]([CH](C)/C=C/[CH](C)C(C)C)CC[CH]12	CAS:67-97-0	C=C1CC[CH](O)C/C1=C/C=C1\CCC[C]2(C)[CH]([CH](C)CCCC(C)C)CC[CH]12	[*:2]C.[*:1]C(C)C1CCC2/C(=C/C=C3/CC(O)CCC3=C)CCCC21C	[*:1]/C=C\C(C)C([*:2])C>>[*:1]CCCC([*:2])C	0.11	no
380	CAS:67-97-0	C=C1CC[CH](O)C/C1=C/C=C1\CCC[C]2(C)[CH]([CH](C)CCCC(C)C)CC[CH]12	CAS:50-14-6	C=C1CC[CH](O)C/C1=C/C=C1\CCC[C]2(C)[CH]([CH](C)/C=C/[CH](C)C(C)C)CC[CH]12	[*:2]C.[*:3]C.[*:1]C1CCC2/C(=C/C=C3/CC(O)CCC3=C)CCCC12C	[*:1]C([*:2])CCC[C@H]([*:3])C>>[*:1]C(C)/C=C/C([*:2])C([*:3])C	0.11	no
381	CAS:50-14-6	C=C1CC[CH](O)C/C1=C/C=C1\CCC[C]2(C)[CH]([CH](C)/C=C/[CH](C)C(C)C)CC[CH]12	CAS:67-97-0	C=C1CC[CH](O)C/C1=C/C=C1\CCC[C]2(C)[CH]([CH](C)CCCC(C)C)CC[CH]12	[*:2]C.[*:3]C.[*:1]C(C)C1CCC2/C(=C/C=C3/CC(O)CCC3=C)CCCC21C	[*:1]/C=C\C([*:2])[C@@H]([*:3])C>>[*:1]CCCC([*:2])[*:3]	0.11	no
382	CAS:50-14-6	C=C1CC[CH](O)C/C1=C/C=C1\CCC[C]2(C)[CH]([CH](C)/C=C/[CH](C)C(C)C)CC[CH]12	CAS:67-97-0	C=C1CC[CH](O)C/C1=C/C=C1\CCC[C]2(C)[CH]([CH](C)CCCC(C)C)CC[CH]12	[*:2]C.[*:1]C1CCC2/C(=C/C=C3/CC(O)CCC3=C)CCCC12C	[*:1]C(C)/C=C/C([*:2])C(C)C>>[*:1]C(C)CCC[C@@H]([*:2])C	0.11	no
383	CAS:50-14-6	C=C1CC[CH](O)C/C1=C/C=C1\CCC[C]2(C)[CH]([CH](C)/C=C/[CH](C)C(C)C)CC[CH]12	CAS:67-97-0	C=C1CC[CH](O)C/C1=C/C=C1\CCC[C]2(C)[CH]([CH](C)CCCC(C)C)CC[CH]12	[*:1]C.[*:2]C1CCC2/C(=C/C=C3/CC(O)CCC3=C)CCCC12C	[*:1]C([*:2])/C=C/C(C)C(C)C>>[*:1]C(C)CCCC([*:2])C	0.11	no
384	CAS:50-14-6	C=C1CC[CH](O)C/C1=C/C=C1\CCC[C]2(C)[CH]([CH](C)/C=C/[CH](C)C(C)C)CC[CH]12	CAS:67-97-0	C=C1CC[CH](O)C/C1=C/C=C1\CCC[C]2(C)[CH]([CH](C)CCCC(C)C)CC[CH]12	[*:1]C.[*:3]C.[*:2]C1CCC2/C(=C/C=C3/CC(O)CCC3=C)CCCC12C	[*:1]C([*:2])/C=C/C([*:3])C(C)C>>[*:1]C([*:2])CCC[C@H]([*:3])C	0.11	no
385	CAS:50-14-6	C=C1CC[CH](O)C/C1=C/C=C1\CCC[C]2(C)[CH]([CH](C)/C=C/[CH](C)C(C)C)CC[CH]12	CAS:67-97-0	C=C1CC[CH](O)C/C1=C/C=C1\CCC[C]2(C)[CH]([CH](C)CCCC(C)C)CC[CH]12	[*:2]C.[*:1]C1CCC2/C(=C/C=C3/CC(O)CCC3=C)CCCC12C	[*:1]C([*:2])/C=C/C(C)C(C)C>>[*:1]C(C)CCC[C@@H]([*:2])C	0.11	no
386	CAS:50-14-6	C=C1CC[CH](O)C/C1=C/C=C1\CCC[C]2(C)[CH]([CH](C)/C=C/[CH](C)C(C)C)CC[CH]12	CAS:67-97-0	C=C1CC[CH](O)C/C1=C/C=C1\CCC[C]2(C)[CH]([CH](C)CCCC(C)C)CC[CH]12	[*:2]C.[*:1]C1CCC2/C(=C/C=C3/CC(O)CCC3=C)CCCC12C	[*:1]C([*:2])/C=C/C(C)C(C)C>>[*:1]C(C)CCC[C@H]([*:2])C	0.11	no
387	CAS:67-97-0	C=C1CC[CH](O)C/C1=C/C=C1\CCC[C]2(C)[CH]([CH](C)CCCC(C)C)CC[CH]12	CAS:50-14-6	C=C1CC[CH](O)C/C1=C/C=C1\CCC[C]2(C)[CH]([CH](C)/C=C/[CH](C)C(C)C)CC[CH]12	[*:2]C.[*:1]C1CCC2/C(=C/C=C3/CC(O)CCC3=C)CCCC12C	[*:1]C([*:2])CCCC(C)C>>[*:1]C(C)/C=C/C([*:2])C(C)C	0.11	no
388	CAS:50-14-6	C=C1CC[CH](O)C/C1=C/C=C1\CCC[C]2(C)[CH]([CH](C)/C=C/[CH](C)C(C)C)CC[CH]12	CAS:67-97-0	C=C1CC[CH](O)C/C1=C/C=C1\CCC[C]2(C)[CH]([CH](C)CCCC(C)C)CC[CH]12	[*:1]C(C)C1CCC2/C(=C/C=C3/CC(O)CCC3=C)CCCC21C	[*:1]/C=C\C(C)C(C)C>>[*:1]CCCC(C)C	0.11	no
389	CAS:50-14-6	C=C1CC[CH](O)C/C1=C/C=C1\CCC[C]2(C)[CH]([CH](C)/C=C/[CH](C)C(C)C)CC[CH]12	CAS:67-97-0	C=C1CC[CH](O)C/C1=C/C=C1\CCC[C]2(C)[CH]([CH](C)CCCC(C)C)CC[CH]12	[*:2]C.[*:1]C(C)C.[*:3]C1CCC2/C(=C/C=C3/CC(O)CCC3=C)CCCC12C	[*:1]C([*:2])/C=C/C([*:3])C>>[*:1]CCCC([*:2])[*:3]	0.11	no
390	CAS:50-14-6	C=C1CC[CH](O)C/C1=C/C=C1\CCC[C]2(C)[CH]([CH](C)/C=C/[CH](C)C(C)C)CC[CH]12	CAS:67-97-0	C=C1CC[CH](O)C/C1=C/C=C1\CCC[C]2(C)[CH]([CH](C)CCCC(C)C)CC[CH]12	[*:2]C.[*:3]C.[*:1]C(C)C1CCC2/C(=C/C=C3/CC(O)CCC3=C)CCCC21C	[*:1]/C=C\C([*:2])C([*:3])C>>[*:1]CCCC([*:2])[*:3]	0.11	no
391	CAS:50-14-6	C=C1CC[CH](O)C/C1=C/C=C1\CCC[C]2(C)[CH]([CH](C)/C=C/[CH](C)C(C)C)CC[CH]12	CAS:67-97-0	C=C1CC[CH](O)C/C1=C/C=C1\CCC[C]2(C)[CH]([CH](C)CCCC(C)C)CC[CH]12	[*:1]C.[*:3]C(C)C.[*:2]C1CCC2/C(=C/C=C3/CC(O)CCC3=C)CCCC12C	[*:1]C([*:2])/C=C/C([*:3])C>>[*:3]CCCC([*:1])[*:2]	0.11	no
392	CAS:50-14-6	C=C1CC[CH](O)C/C1=C/C=C1\CCC[C]2(C)[CH]([CH](C)/C=C/[CH](C)C(C)C)CC[CH]12	CAS:67-97-0	C=C1CC[CH](O)C/C1=C/C=C1\CCC[C]2(C)[CH]([CH](C)CCCC(C)C)CC[CH]12	[*:2]C.[*:1]C(C)C1CCC2/C(=C/C=C3/CC(O)CCC3=C)CCCC21C	[*:1]/C=C\C([*:2])C(C)C>>[*:1]CCCC([*:2])C	0.11	no
393	CAS:50-14-6	C=C1CC[CH](O)C/C1=C/C=C1\CCC[C]2(C)[CH]([CH](C)/C=C/[CH](C)C(C)C)CC[CH]12	CAS:67-97-0	C=C1CC[CH](O)C/C1=C/C=C1\CCC[C]2(C)[CH]([CH](C)CCCC(C)C)CC[CH]12	[*:2]C.[*:1]C(C)C1CCC2/C(=C/C=C3/CC(O)CCC3=C)CCCC21C	[*:1]/C=C\C([*:2])C(C)C>>[*:1]CCC[C@@H]([*:2])C	0.11	no
394	CAS:50-14-6	C=C1CC[CH](O)C/C1=C/C=C1\CCC[C]2(C)[CH]([CH](C)/C=C/[CH](C)C(C)C)CC[CH]12	CAS:67-97-0	C=C1CC[CH](O)C/C1=C/C=C1\CCC[C]2(C)[CH]([CH](C)CCCC(C)C)CC[CH]12	[*:2]C.[*:1]C(C)C1CCC2/C(=C/C=C3/CC(O)CCC3=C)CCCC21C	[*:1]/C=C\C([*:2])C(C)C>>[*:1]CCC[C@H]([*:2])C	0.11	no
395	CAS:50-14-6	C=C1CC[CH](O)C/C1=C/C=C1\CCC[C]2(C)[CH]([CH](C)/C=C/[CH](C)C(C)C)CC[CH]12	CAS:67-97-0	C=C1CC[CH](O)C/C1=C/C=C1\CCC[C]2(C)[CH]([CH](C)CCCC(C)C)CC[CH]12	[*:2]C.[*:1]C(C)C1CCC2/C(=C/C=C3/CC(O)CCC3=C)CCCC21C	[*:1]/C=C\C(C)C([*:2])C>>[*:1]CCC[C@@H]([*:2])C	0.11	no
396	CAS:50-14-6	C=C1CC[CH](O)C/C1=C/C=C1\CCC[C]2(C)[CH]([CH](C)/C=C/[CH](C)C(C)C)CC[CH]12	CAS:67-97-0	C=C1CC[CH](O)C/C1=C/C=C1\CCC[C]2(C)[CH]([CH](C)CCCC(C)C)CC[CH]12	[*:2]C.[*:1]C(C)C1CCC2/C(=C/C=C3/CC(O)CCC3=C)CCCC21C	[*:1]/C=C\C(C)C([*:2])C>>[*:1]CCC[C@H]([*:2])C	0.11	no
397	CAS:50-14-6	C=C1CC[CH](O)C/C1=C/C=C1\CCC[C]2(C)[CH]([CH](C)/C=C/[CH](C)C(C)C)CC[CH]12	CAS:67-97-0	C=C1CC[CH](O)C/C1=C/C=C1\CCC[C]2(C)[CH]([CH](C)CCCC(C)C)CC[CH]12	[*:2]C.[*:1]C(C)C1CCC2/C(=C/C=C3/CC(O)CCC3=C)CCCC21C	[*:1]/C=C\C(C)[C@@H]([*:2])C>>[*:1]CCCC([*:2])C	0.11	no
398	CAS:50-14-6	C=C1CC[CH](O)C/C1=C/C=C1\CCC[C]2(C)[CH]([CH](C)/C=C/[CH](C)C(C)C)CC[CH]12	CAS:67-97-0	C=C1CC[CH](O)C/C1=C/C=C1\CCC[C]2(C)[CH]([CH](C)CCCC(C)C)CC[CH]12	[*:1]C.[*:3]C.[*:2]C1CCC2/C(=C/C=C3/CC(O)CCC3=C)CCCC12C	[*:1]C([*:2])/C=C/C([*:3])C(C)C>>[*:1]C([*:2])CCC[C@@H]([*:3])C	0.11	no
399	CAS:50-14-6	C=C1CC[CH](O)C/C1=C/C=C1\CCC[C]2(C)[CH]([CH](C)/C=C/[CH](C)C(C)C)CC[CH]12	CAS:67-97-0	C=C1CC[CH](O)C/C1=C/C=C1\CCC[C]2(C)[CH]([CH](C)CCCC(C)C)CC[CH]12	[*:1]C.[*:3]C.[*:2]C1CCC2/C(=C/C=C3/CC(O)CCC3=C)CCCC12C	[*:1]C([*:2])/C=C/C([*:3])C(C)C>>[*:1]C([*:2])CCCC([*:3])C	0.11	no
400	CAS:50-14-6	C=C1CC[CH](O)C/C1=C/C=C1\CCC[C]2(C)[CH]([CH](C)/C=C/[CH](C)C(C)C)CC[CH]12	CAS:67-97-0	C=C1CC[CH](O)C/C1=C/C=C1\CCC[C]2(C)[CH]([CH](C)CCCC(C)C)CC[CH]12	[*:1]C.[*:3]C.[*:2]C1CCC2/C(=C/C=C3/CC(O)CCC3=C)CCCC12C	[*:1]C([*:2])/C=C/C([*:3])C(C)C>>[*:1]C([*:3])CCCC([*:2])C	0.11	no
401	CAS:50-14-6	C=C1CC[CH](O)C/C1=C/C=C1\CCC[C]2(C)[CH]([CH](C)/C=C/[CH](C)C(C)C)CC[CH]12	CAS:67-97-0	C=C1CC[CH](O)C/C1=C/C=C1\CCC[C]2(C)[CH]([CH](C)CCCC(C)C)CC[CH]12	[*:2]C.[*:3]C.[*:1]C(C)C1CCC2/C(=C/C=C3/CC(O)CCC3=C)CCCC21C	[*:1]/C=C\C(C)C([*:2])[*:3]>>[*:1]CCCC([*:2])[*:3]	0.11	no
402	CAS:50-14-6	C=C1CC[CH](O)C/C1=C/C=C1\CCC[C]2(C)[CH]([CH](C)/C=C/[CH](C)C(C)C)CC[CH]12	CAS:67-97-0	C=C1CC[CH](O)C/C1=C/C=C1\CCC[C]2(C)[CH]([CH](C)CCCC(C)C)CC[CH]12	[*:2]C.[*:3]C.[*:1]C(C)C1CCC2/C(=C/C=C3/CC(O)CCC3=C)CCCC21C	[*:1]/C=C\C([*:2])[C@H]([*:3])C>>[*:1]CCCC([*:2])[*:3]	0.11	no
403	CAS:50-14-6	C=C1CC[CH](O)C/C1=C/C=C1\CCC[C]2(C)[CH]([CH](C)/C=C/[CH](C)C(C)C)CC[CH]12	CAS:67-97-0	C=C1CC[CH](O)C/C1=C/C=C1\CCC[C]2(C)[CH]([CH](C)CCCC(C)C)CC[CH]12	[*:2]C.[*:1]C1CCC2/C(=C/C=C3/CC(O)CCC3=C)CCCC12C	[*:1]C(C)/C=C/C([*:2])C(C)C>>[*:1]C(C)CCCC([*:2])C	0.11	no
404	CAS:67-97-0	C=C1CC[CH](O)C/C1=C/C=C1\CCC[C]2(C)[CH]([CH](C)CCCC(C)C)CC[CH]12	CAS:50-14-6	C=C1CC[CH](O)C/C1=C/C=C1\CCC[C]2(C)[CH]([CH](C)/C=C/[CH](C)C(C)C)CC[CH]12	[*:2]C.[*:3]C.[*:1]C1CCC2/C(=C/C=C3/CC(O)CCC3=C)CCCC12C	[*:1]C([*:2])CCCC([*:3])C>>[*:1]C(C)/C=C/C([*:2])C([*:3])C	0.11	no
405	CAS:50-14-6	C=C1CC[CH](O)C/C1=C/C=C1\CCC[C]2(C)[CH]([CH](C)/C=C/[CH](C)C(C)C)CC[CH]12	CAS:67-97-0	C=C1CC[CH](O)C/C1=C/C=C1\CCC[C]2(C)[CH]([CH](C)CCCC(C)C)CC[CH]12	[*:1]C.[*:2]C1CCC2/C(=C/C=C3/CC(O)CCC3=C)CCCC12C	[*:1]C([*:2])/C=C/C(C)C(C)C>>[*:1]C([*:2])CCCC(C)C	0.11	no
406	CAS:67-97-0	C=C1CC[CH](O)C/C1=C/C=C1\CCC[C]2(C)[CH]([CH](C)CCCC(C)C)CC[CH]12	CAS:50-14-6	C=C1CC[CH](O)C/C1=C/C=C1\CCC[C]2(C)[CH]([CH](C)/C=C/[CH](C)C(C)C)CC[CH]12	[*:2]C.[*:1]C1CCC2/C(=C/C=C3/CC(O)CCC3=C)CCCC12C	[*:1]C([*:2])CCCC(C)C>>[*:1]C(C)/C=C/C(C)[C@H]([*:2])C	0.11	no
407	CAS:67-97-0	C=C1CC[CH](O)C/C1=C/C=C1\CCC[C]2(C)[CH]([CH](C)CCCC(C)C)CC[CH]12	CAS:50-14-6	C=C1CC[CH](O)C/C1=C/C=C1\CCC[C]2(C)[CH]([CH](C)/C=C/[CH](C)C(C)C)CC[CH]12	[*:2]C.[*:1]C1CCC2/C(=C/C=C3/CC(O)CCC3=C)CCCC12C	[*:1]C([*:2])CCCC(C)C>>[*:1]C(C)/C=C/C(C)C([*:2])C	0.11	no
408	CAS:67-97-0	C=C1CC[CH](O)C/C1=C/C=C1\CCC[C]2(C)[CH]([CH](C)CCCC(C)C)CC[CH]12	CAS:50-14-6	C=C1CC[CH](O)C/C1=C/C=C1\CCC[C]2(C)[CH]([CH](C)/C=C/[CH](C)C(C)C)CC[CH]12	[*:2]C.[*:3]C.[*:1]C1CCC2/C(=C/C=C3/CC(O)CCC3=C)CCCC12C	[*:1]C([*:2])CCCC([*:3])C>>[*:1]C(C)/C=C/C([*:2])[C@H]([*:3])C	0.11	no
409	CAS:50-14-6	C=C1CC[CH](O)C/C1=C/C=C1\CCC[C]2(C)[CH]([CH](C)/C=C/[CH](C)C(C)C)CC[CH]12	CAS:67-97-0	C=C1CC[CH](O)C/C1=C/C=C1\CCC[C]2(C)[CH]([CH](C)CCCC(C)C)CC[CH]12	[*:1]C1CCC2/C(=C/C=C3/CC(O)CCC3=C)CCCC12C	[*:1]C(C)/C=C/C(C)C(C)C>>[*:1]C(C)CCCC(C)C	0.11	no
410	CAS:67-97-0	C=C1CC[CH](O)C/C1=C/C=C1\CCC[C]2(C)[CH]([CH](C)CCCC(C)C)CC[CH]12	CAS:50-14-6	C=C1CC[CH](O)C/C1=C/C=C1\CCC[C]2(C)[CH]([CH](C)/C=C/[CH](C)C(C)C)CC[CH]12	[*:2]C.[*:3]C.[*:1]C1CCC2/C(=C/C=C3/CC(O)CCC3=C)CCCC12C	[*:1]C([*:2])CCCC([*:3])C>>[*:1]C(C)/C=C/C([*:2])[C@@H]([*:3])C	0.11	no
411	CAS:50-14-6	C=C1CC[CH](O)C/C1=C/C=C1\CCC[C]2(C)[CH]([CH](C)/C=C/[CH](C)C(C)C)CC[CH]12	CAS:67-97-0	C=C1CC[CH](O)C/C1=C/C=C1\CCC[C]2(C)[CH]([CH](C)CCCC(C)C)CC[CH]12	[*:1]C.[*:3]C.[*:2]C1CCC2/C(=C/C=C3/CC(O)CCC3=C)CCCC12C	[*:1]C([*:2])/C=C/C(C)C([*:3])C>>[*:1]C([*:2])CCCC([*:3])C	0.11	no
412	CAS:50-14-6	C=C1CC[CH](O)C/C1=C/C=C1\CCC[C]2(C)[CH]([CH](C)/C=C/[CH](C)C(C)C)CC[CH]12	CAS:67-97-0	C=C1CC[CH](O)C/C1=C/C=C1\CCC[C]2(C)[CH]([CH](C)CCCC(C)C)CC[CH]12	[*:1]C.[*:3]C.[*:2]C1CCC2/C(=C/C=C3/CC(O)CCC3=C)CCCC12C	[*:1]C([*:2])/C=C/C(C)C([*:3])C>>[*:1]C([*:2])CCC[C@@H]([*:3])C	0.11	no
413	CAS:50-14-6	C=C1CC[CH](O)C/C1=C/C=C1\CCC[C]2(C)[CH]([CH](C)/C=C/[CH](C)C(C)C)CC[CH]12	CAS:67-97-0	C=C1CC[CH](O)C/C1=C/C=C1\CCC[C]2(C)[CH]([CH](C)CCCC(C)C)CC[CH]12	[*:2]C.[*:1]C1CCC2/C(=C/C=C3/CC(O)CCC3=C)CCCC12C	[*:1]C(C)/C=C/C([*:2])C(C)C>>[*:1]C(C)CCC[C@H]([*:2])C	0.11	no
414	CAS:50-14-6	C=C1CC[CH](O)C/C1=C/C=C1\CCC[C]2(C)[CH]([CH](C)/C=C/[CH](C)C(C)C)CC[CH]12	CAS:67-97-0	C=C1CC[CH](O)C/C1=C/C=C1\CCC[C]2(C)[CH]([CH](C)CCCC(C)C)CC[CH]12	[*:1]C.[*:3]C.[*:2]C1CCC2/C(=C/C=C3/CC(O)CCC3=C)CCCC12C	[*:1]C([*:2])/C=C/C(C)C([*:3])C>>[*:1]C([*:2])CCC[C@H]([*:3])C	0.11	no
415	CAS:50-14-6	C=C1CC[CH](O)C/C1=C/C=C1\CCC[C]2(C)[CH]([CH](C)/C=C/[CH](C)C(C)C)CC[CH]12	CAS:67-97-0	C=C1CC[CH](O)C/C1=C/C=C1\CCC[C]2(C)[CH]([CH](C)CCCC(C)C)CC[CH]12	[*:1]C.[*:3]C.[*:2]C1CCC2/C(=C/C=C3/CC(O)CCC3=C)CCCC12C	[*:1]C([*:2])/C=C/C(C)[C@@H]([*:3])C>>[*:1]C([*:3])CCCC([*:2])C	0.11	no
416	CAS:50-14-6	C=C1CC[CH](O)C/C1=C/C=C1\CCC[C]2(C)[CH]([CH](C)/C=C/[CH](C)C(C)C)CC[CH]12	CAS:67-97-0	C=C1CC[CH](O)C/C1=C/C=C1\CCC[C]2(C)[CH]([CH](C)CCCC(C)C)CC[CH]12	[*:1]C.[*:3]C.[*:2]C1CCC2/C(=C/C=C3/CC(O)CCC3=C)CCCC12C	[*:1]C([*:2])/C=C/C(C)[C@@H]([*:3])C>>[*:1]C([*:2])CCCC([*:3])C	0.11	no
417	CAS:50-14-6	C=C1CC[CH](O)C/C1=C/C=C1\CCC[C]2(C)[CH]([CH](C)/C=C/[CH](C)C(C)C)CC[CH]12	CAS:67-97-0	C=C1CC[CH](O)C/C1=C/C=C1\CCC[C]2(C)[CH]([CH](C)CCCC(C)C)CC[CH]12	[*:1]C.[*:3]C.[*:2]C1CCC2/C(=C/C=C3/CC(O)CCC3=C)CCCC12C	[*:1]C([*:2])/C=C/C(C)[C@H]([*:3])C>>[*:1]C([*:3])CCCC([*:2])C	0.11	no
418	CAS:50-14-6	C=C1CC[CH](O)C/C1=C/C=C1\CCC[C]2(C)[CH]([CH](C)/C=C/[CH](C)C(C)C)CC[CH]12	CAS:67-97-0	C=C1CC[CH](O)C/C1=C/C=C1\CCC[C]2(C)[CH]([CH](C)CCCC(C)C)CC[CH]12	[*:1]C.[*:3]C.[*:2]C1CCC2/C(=C/C=C3/CC(O)CCC3=C)CCCC12C	[*:1]C([*:2])/C=C/C(C)[C@H]([*:3])C>>[*:1]C([*:2])CCCC([*:3])C	0.11	no
419	CAS:67-97-0	C=C1CC[CH](O)C/C1=C/C=C1\CCC[C]2(C)[CH]([CH](C)CCCC(C)C)CC[CH]12	CAS:50-14-6	C=C1CC[CH](O)C/C1=C/C=C1\CCC[C]2(C)[CH]([CH](C)/C=C/[CH](C)C(C)C)CC[CH]12	[*:1]C.[*:2]C.[*:3]C1CCC2/C(=C/C=C3/CC(O)CCC3=C)CCCC12C	[*:1]C([*:2])CCCC([*:3])C>>[*:3]C(C)/C=C/C([*:1])[C@H]([*:2])C	0.11	no
420	CAS:67-97-0	C=C1CC[CH](O)C/C1=C/C=C1\CCC[C]2(C)[CH]([CH](C)CCCC(C)C)CC[CH]12	CAS:50-14-6	C=C1CC[CH](O)C/C1=C/C=C1\CCC[C]2(C)[CH]([CH](C)/C=C/[CH](C)C(C)C)CC[CH]12	[*:2]C.[*:3]C.[*:1]C1CCC2/C(=C/C=C3/CC(O)CCC3=C)CCCC12C	[*:1]C([*:2])CCCC([*:3])C>>[*:1]C(C)/C=C/C(C)C([*:2])[*:3]	0.11	no
421	CAS:67-97-0	C=C1CC[CH](O)C/C1=C/C=C1\CCC[C]2(C)[CH]([CH](C)CCCC(C)C)CC[CH]12	CAS:50-14-6	C=C1CC[CH](O)C/C1=C/C=C1\CCC[C]2(C)[CH]([CH](C)/C=C/[CH](C)C(C)C)CC[CH]12	[*:1]C.[*:2]C.[*:3]C1CCC2/C(=C/C=C3/CC(O)CCC3=C)CCCC12C	[*:1]C([*:2])CCCC([*:3])C>>[*:3]C(C)/C=C/C(C)C([*:1])[*:2]	0.11	no
422	CAS:67-97-0	C=C1CC[CH](O)C/C1=C/C=C1\CCC[C]2(C)[CH]([CH](C)CCCC(C)C)CC[CH]12	CAS:50-14-6	C=C1CC[CH](O)C/C1=C/C=C1\CCC[C]2(C)[CH]([CH](C)/C=C/[CH](C)C(C)C)CC[CH]12	[*:2]C.[*:3]C.[*:1]C1CCC2/C(=C/C=C3/CC(O)CCC3=C)CCCC12C	[*:1]C([*:2])CCC[C@H]([*:3])C>>[*:1]C(C)/C=C/C(C)C([*:2])[*:3]	0.11	no
423	CAS:67-97-0	C=C1CC[CH](O)C/C1=C/C=C1\CCC[C]2(C)[CH]([CH](C)CCCC(C)C)CC[CH]12	CAS:50-14-6	C=C1CC[CH](O)C/C1=C/C=C1\CCC[C]2(C)[CH]([CH](C)/C=C/[CH](C)C(C)C)CC[CH]12	[*:1]C.[*:2]C.[*:3]C1CCC2/C(=C/C=C3/CC(O)CCC3=C)CCCC12C	[*:1]C([*:2])CCCC([*:3])C>>[*:3]C(C)/C=C/C([*:1])C([*:2])C	0.11	no
424	CAS:67-97-0	C=C1CC[CH](O)C/C1=C/C=C1\CCC[C]2(C)[CH]([CH](C)CCCC(C)C)CC[CH]12	CAS:50-14-6	C=C1CC[CH](O)C/C1=C/C=C1\CCC[C]2(C)[CH]([CH](C)/C=C/[CH](C)C(C)C)CC[CH]12	[*:2]C.[*:3]C.[*:1]C1CCC2/C(=C/C=C3/CC(O)CCC3=C)CCCC12C	[*:1]C([*:2])CCC[C@@H]([*:3])C>>[*:1]C(C)/C=C/C(C)C([*:2])[*:3]	0.11	no
425	CAS:67-97-0	C=C1CC[CH](O)C/C1=C/C=C1\CCC[C]2(C)[CH]([CH](C)CCCC(C)C)CC[CH]12	CAS:50-14-6	C=C1CC[CH](O)C/C1=C/C=C1\CCC[C]2(C)[CH]([CH](C)/C=C/[CH](C)C(C)C)CC[CH]12	[*:1]C.[*:2]C.[*:3]C1CCC2/C(=C/C=C3/CC(O)CCC3=C)CCCC12C	[*:1]C([*:2])CCCC([*:3])C>>[*:3]C(C)/C=C/C([*:1])[C@@H]([*:2])C	0.11	no
426	CAS:50-14-6	C=C1CC[CH](O)C/C1=C/C=C1\CCC[C]2(C)[CH]([CH](C)/C=C/[CH](C)C(C)C)CC[CH]12	CAS:67-97-0	C=C1CC[CH](O)C/C1=C/C=C1\CCC[C]2(C)[CH]([CH](C)CCCC(C)C)CC[CH]12	[*:2]C.[*:1]C1CCC2/C(=C/C=C3/CC(O)CCC3=C)CCCC12C	[*:1]C(C)/C=C/C(C)[C@H]([*:2])C>>[*:1]C(C)CCCC([*:2])C	0.11	no
427	CAS:50-14-6	C=C1CC[CH](O)C/C1=C/C=C1\CCC[C]2(C)[CH]([CH](C)/C=C/[CH](C)C(C)C)CC[CH]12	CAS:67-97-0	C=C1CC[CH](O)C/C1=C/C=C1\CCC[C]2(C)[CH]([CH](C)CCCC(C)C)CC[CH]12	[*:2]C.[*:1]C(C)C1CCC2/C(=C/C=C3/CC(O)CCC3=C)CCCC21C	[*:1]/C=C\C(C)[C@H]([*:2])C>>[*:1]CCCC([*:2])C	0.11	no
428	CAS:50-14-6	C=C1CC[CH](O)C/C1=C/C=C1\CCC[C]2(C)[CH]([CH](C)/C=C/[CH](C)C(C)C)CC[CH]12	CAS:67-97-0	C=C1CC[CH](O)C/C1=C/C=C1\CCC[C]2(C)[CH]([CH](C)CCCC(C)C)CC[CH]12	[*:2]C.[*:1]C1CCC2/C(=C/C=C3/CC(O)CCC3=C)CCCC12C	[*:1]C(C)/C=C/C(C)C([*:2])C>>[*:1]C(C)CCC[C@H]([*:2])C	0.11	no
429	CAS:50-14-6	C=C1CC[CH](O)C/C1=C/C=C1\CCC[C]2(C)[CH]([CH](C)/C=C/[CH](C)C(C)C)CC[CH]12	CAS:67-97-0	C=C1CC[CH](O)C/C1=C/C=C1\CCC[C]2(C)[CH]([CH](C)CCCC(C)C)CC[CH]12	[*:2]C.[*:1]C1CCC2/C(=C/C=C3/CC(O)CCC3=C)CCCC12C	[*:1]C(C)/C=C/C(C)C([*:2])C>>[*:1]C(C)CCCC([*:2])C	0.11	no
430	CAS:50-14-6	C=C1CC[CH](O)C/C1=C/C=C1\CCC[C]2(C)[CH]([CH](C)/C=C/[CH](C)C(C)C)CC[CH]12	CAS:67-97-0	C=C1CC[CH](O)C/C1=C/C=C1\CCC[C]2(C)[CH]([CH](C)CCCC(C)C)CC[CH]12	[*:2]C.[*:1]C1CCC2/C(=C/C=C3/CC(O)CCC3=C)CCCC12C	[*:1]C(C)/C=C/C(C)C([*:2])C>>[*:1]C(C)CCC[C@@H]([*:2])C	0.11	no
431	CAS:67-97-0	C=C1CC[CH](O)C/C1=C/C=C1\CCC[C]2(C)[CH]([CH](C)CCCC(C)C)CC[CH]12	CAS:50-14-6	C=C1CC[CH](O)C/C1=C/C=C1\CCC[C]2(C)[CH]([CH](C)/C=C/[CH](C)C(C)C)CC[CH]12	[*:2]C.[*:1]C1CCC2/C(=C/C=C3/CC(O)CCC3=C)CCCC12C	[*:1]C([*:2])CCCC(C)C>>[*:1]C(C)/C=C/C(C)[C@@H]([*:2])C	0.11	no
432	CAS:50-14-6	C=C1CC[CH](O)C/C1=C/C=C1\CCC[C]2(C)[CH]([CH](C)/C=C/[CH](C)C(C)C)CC[CH]12	CAS:67-97-0	C=C1CC[CH](O)C/C1=C/C=C1\CCC[C]2(C)[CH]([CH](C)CCCC(C)C)CC[CH]12	[*:2]C.[*:1]C1CCC2/C(=C/C=C3/CC(O)CCC3=C)CCCC12C	[*:1]C(C)/C=C/C(C)[C@@H]([*:2])C>>[*:1]C(C)CCCC([*:2])C	0.11	no
433	CAS:70-11-1	O=C(CBr)c1ccccc1	CAS:532-27-4	O=C(CCl)c1ccccc1	[*:1]C(=O)c1ccccc1	[*:1]CBr>>[*:1]CCl	0.11	no
434	CAS:70-11-1	O=C(CBr)c1ccccc1	CAS:532-27-4	O=C(CCl)c1ccccc1	[*:1]CC(=O)c1ccccc1	[*:1]Br>>[*:1]Cl	0.11	no
435	CAS:6807-17-6	CC(C)CC(C)(c1ccc(O)cc1)c1ccc(O)cc1	CAS:14868-03-2	Oc1ccc(C(=C(Cl)Cl)c2ccc(O)cc2)cc1	[*:1]c1ccc(O)cc1.[*:2]c1ccc(O)cc1	[*:1]C([*:2])(C)CC(C)C>>[*:1]C([*:2])=C(Cl)Cl	0.11	no
436	CAS:90-30-2	c1ccc(Nc2cccc3ccccc23)cc1	CAS:119356-77-3	CN(C)[CH](CCOc1cccc2ccccc12)c1ccccc1	[*:1]c1cccc2ccccc12.[*:2]c1ccccc1	[*:1]N[*:2]>>[*:1]OCCC([*:2])N(C)C	0.11	no
437	CAS:594-30-9	Cl[Bi](Cl)(c1ccccc1)(c1ccccc1)c1ccccc1	CAS:1162-06-7	CC(=O)O[Pb](c1ccccc1)(c1ccccc1)c1ccccc1	[*:1]c1ccccc1.[*:2]c1ccccc1.[*:3]c1ccccc1	[*:1][Bi]([*:2])([*:3])(Cl)Cl>>[*:1][Pb]([*:2])([*:3])OC(C)=O	0.11	no
438	CAS:145-39-1	Cc1c(C)c([N+](=O)[O-])c(C(C)(C)C)c([N+](=O)[O-])c1C	CAS:81-15-2	Cc1c([N+](=O)[O-])c(C)c([N+](=O)[O-])c(C(C)(C)C)c1[N+](=O)[O-]	[*:1]c1c(C)c([N+](=O)[O-])c(C(C)(C)C)c([N+](=O)[O-])c1C	[*:1]C>>[*:1][N+](=O)[O-]	0.11	no
439	CID:6528	Cc1ccc(OP(=O)(Oc2ccccc2)Oc2ccccc2)cc1	CAS:115-86-6	O=P(Oc1ccccc1)(Oc1ccccc1)Oc1ccccc1	[*:1]OP(=O)(Oc1ccccc1)Oc1ccccc1	[*:1]c1ccc(C)cc1>>[*:1]c1ccccc1	0.11	no
440	CID:6528	Cc1ccc(OP(=O)(Oc2ccccc2)Oc2ccccc2)cc1	CAS:115-86-6	O=P(Oc1ccccc1)(Oc1ccccc1)Oc1ccccc1	[*:1]c1ccc(OP(=O)(Oc2ccccc2)Oc2ccccc2)cc1	[*:1]C>>[*:1][H]	0.11	no
441	CAS:123-30-8	Nc1ccc(O)cc1	CAS:123-31-9	Oc1ccc(O)cc1	[*:1]c1ccc(O)cc1	[*:1]N>>[*:1]O	0.11	no
442	CAS:1571-75-1	CC(c1ccccc1)(c1ccc(O)cc1)c1ccc(O)cc1	CAS:6807-17-6	CC(C)CC(C)(c1ccc(O)cc1)c1ccc(O)cc1	[*:1]C.[*:2]c1ccc(O)cc1.[*:3]c1ccc(O)cc1	[*:1]C([*:2])([*:3])c1ccccc1>>[*:1]C(C)CC([*:2])([*:3])C	0.1	no
443	CAS:6807-17-6	CC(C)CC(C)(c1ccc(O)cc1)c1ccc(O)cc1	CAS:1571-75-1	CC(c1ccccc1)(c1ccc(O)cc1)c1ccc(O)cc1	[*:1]C.[*:2]c1ccc(O)cc1.[*:3]c1ccc(O)cc1	[*:1]C([*:2])([*:3])CC(C)C>>[*:1]C([*:2])([*:3])c1ccccc1	0.1	no
444	CAS:6807-17-6	CC(C)CC(C)(c1ccc(O)cc1)c1ccc(O)cc1	CAS:1571-75-1	CC(c1ccccc1)(c1ccc(O)cc1)c1ccc(O)cc1	[*:1]C(C)(c1ccc(O)cc1)c1ccc(O)cc1	[*:1]CC(C)C>>[*:1]c1ccccc1	0.1	no
445	CAS:1571-75-1	CC(c1ccccc1)(c1ccc(O)cc1)c1ccc(O)cc1	CAS:6807-17-6	CC(C)CC(C)(c1ccc(O)cc1)c1ccc(O)cc1	[*:1]C.[*:2]c1ccc(O)cc1.[*:3]c1ccc(O)cc1	[*:1]C([*:2])([*:3])c1ccccc1>>[*:1][C@@H](C)CC([*:2])([*:3])C	0.1	no
446	CAS:1571-75-1	CC(c1ccccc1)(c1ccc(O)cc1)c1ccc(O)cc1	CAS:6807-17-6	CC(C)CC(C)(c1ccc(O)cc1)c1ccc(O)cc1	[*:1]C.[*:2]c1ccc(O)cc1.[*:3]c1ccc(O)cc1	[*:1]C([*:2])([*:3])c1ccccc1>>[*:1][C@H](C)CC([*:2])([*:3])C	0.1	no
447	CAS:6807-17-6	CC(C)CC(C)(c1ccc(O)cc1)c1ccc(O)cc1	CAS:843-55-0	Oc1ccc(C2(c3ccc(O)cc3)CCCCC2)cc1	[*:1]c1ccc(O)cc1.[*:2]c1ccc(O)cc1	[*:1]C([*:2])(C)CC(C)C>>[*:1]C1([*:2])CCCCC1	0.1	no
448	CAS:56-53-1	CC/C(=C(/CC)c1ccc(O)cc1)c1ccc(O)cc1	CAS:843-55-0	Oc1ccc(C2(c3ccc(O)cc3)CCCCC2)cc1	[*:1]c1ccc(O)cc1.[*:2]c1ccc(O)cc1	[*:1]/C(CC)=C(/[*:2])CC>>[*:1]C1([*:2])CCCCC1	0.09	no
449	CAS:128-37-0	Cc1cc(C(C)(C)C)c(O)c(C(C)(C)C)c1	CAS:489-01-0	COc1cc(C(C)(C)C)c(O)c(C(C)(C)C)c1	[*:1]c1cc(C(C)(C)C)c(O)c(C(C)(C)C)c1	[*:1]C>>[*:1]OC	0.09	no
450	CAS:80-05-7	CC(C)(c1ccc(O)cc1)c1ccc(O)cc1	CAS:843-55-0	Oc1ccc(C2(c3ccc(O)cc3)CCCCC2)cc1	[*:1]c1ccc(O)cc1.[*:2]c1ccc(O)cc1	[*:1]C([*:2])(C)C>>[*:1]C1([*:2])CCCCC1	0.09	no
451	CAS:56-53-1	CC/C(=C(/CC)c1ccc(O)cc1)c1ccc(O)cc1	CAS:14868-03-2	Oc1ccc(C(=C(Cl)Cl)c2ccc(O)cc2)cc1	[*:1]c1ccc(O)cc1.[*:2]c1ccc(O)cc1	[*:1]/C(CC)=C(/[*:2])CC>>[*:1]C([*:2])=C(Cl)Cl	0.08	no
452	CAS:80-05-7	CC(C)(c1ccc(O)cc1)c1ccc(O)cc1	CAS:1571-75-1	CC(c1ccccc1)(c1ccc(O)cc1)c1ccc(O)cc1	[*:1]C(C)(c1ccc(O)cc1)c1ccc(O)cc1	[*:1]C>>[*:1]c1ccccc1	0.08	no
453	CAS:80-05-7	CC(C)(c1ccc(O)cc1)c1ccc(O)cc1	CAS:1571-75-1	CC(c1ccccc1)(c1ccc(O)cc1)c1ccc(O)cc1	[*:1]C.[*:2]c1ccc(O)cc1.[*:3]c1ccc(O)cc1	[*:1]C([*:2])([*:3])C>>[*:1]C([*:2])([*:3])c1ccccc1	0.08	no
454	CAS:80-05-7	CC(C)(c1ccc(O)cc1)c1ccc(O)cc1	CAS:77-40-7	CCC(C)(c1ccc(O)cc1)c1ccc(O)cc1	[*:1]c1ccc(O)cc1.[*:2]c1ccc(O)cc1	[*:1]C([*:2])(C)C>>[*:1]C([*:2])(C)CC	0.08	no
455	CAS:80-05-7	CC(C)(c1ccc(O)cc1)c1ccc(O)cc1	CAS:77-40-7	CCC(C)(c1ccc(O)cc1)c1ccc(O)cc1	[*:1]C.[*:2]c1ccc(O)cc1.[*:3]c1ccc(O)cc1	[*:1]C([*:2])([*:3])C>>[*:1]C([*:2])([*:3])CC	0.08	no
456	CAS:80-05-7	CC(C)(c1ccc(O)cc1)c1ccc(O)cc1	CAS:77-40-7	CCC(C)(c1ccc(O)cc1)c1ccc(O)cc1	[*:1]C(C)(c1ccc(O)cc1)c1ccc(O)cc1	[*:1]C>>[*:1]CC	0.08	no
457	CAS:95-80-7	Cc1ccc(N)cc1N	CAS:95-53-4	Cc1ccccc1N	[*:1]c1ccc(C)c(N)c1	[*:1]N>>[*:1][H]	0.08	no
458	CAS:80-05-7	CC(C)(c1ccc(O)cc1)c1ccc(O)cc1	CAS:14868-03-2	Oc1ccc(C(=C(Cl)Cl)c2ccc(O)cc2)cc1	[*:1]c1ccc(O)cc1.[*:2]c1ccc(O)cc1	[*:1]C([*:2])(C)C>>[*:1]C([*:2])=C(Cl)Cl	0.07	no
459	CAS:934-00-9	COc1cccc(O)c1O	CAS:87-66-1	Oc1cccc(O)c1O	[*:1]Oc1cccc(O)c1O	[*:1]C>>[*:1][H]	0.07	no
460	CAS:87-66-1	Oc1cccc(O)c1O	CAS:934-00-9	COc1cccc(O)c1O	[*:1]c1cccc(O)c1O	[*:1]O>>[*:1]OC	0.07	no
461	CAS:6807-17-6	CC(C)CC(C)(c1ccc(O)cc1)c1ccc(O)cc1	CAS:27955-94-8	CC(c1ccc(O)cc1)(c1ccc(O)cc1)c1ccc(O)cc1	[*:1]C(C)(c1ccc(O)cc1)c1ccc(O)cc1	[*:1]CC(C)C>>[*:1]c1ccc(O)cc1	0.07	no
462	CAS:56-53-1	CC/C(=C(/CC)c1ccc(O)cc1)c1ccc(O)cc1	CAS:77-40-7	CCC(C)(c1ccc(O)cc1)c1ccc(O)cc1	[*:1]c1ccc(O)cc1.[*:2]c1ccc(O)cc1	[*:1]/C(CC)=C(/[*:2])CC>>[*:1]C([*:2])(C)CC	0.07	no
463	CAS:77-40-7	CCC(C)(c1ccc(O)cc1)c1ccc(O)cc1	CAS:56-53-1	CC/C(=C(/CC)c1ccc(O)cc1)c1ccc(O)cc1	[*:1]CC.[*:2]c1ccc(O)cc1.[*:3]c1ccc(O)cc1	[*:1]C([*:2])([*:3])C>>[*:1]C([*:2])=C([*:3])CC	0.07	no
464	CAS:2835-99-6	Cc1cc(O)ccc1N	CAS:123-30-8	Nc1ccc(O)cc1	[*:1]c1cc(O)ccc1N	[*:1]C>>[*:1][H]	0.07	no
465	CAS:1210-39-5	O=CC=C(c1ccccc1)c1ccccc1	CAS:80-10-4	Cl[Si](Cl)(c1ccccc1)c1ccccc1	[*:1]c1ccccc1.[*:2]c1ccccc1	[*:1]C([*:2])=CC=O>>[*:1][Si]([*:2])(Cl)Cl	0.07	no
466	CAS:152-43-2	C#C[C]1(O)CC[CH]2[CH]3CCc4cc(OC5CCCC5)ccc4[CH]3CC[C]21C	CAS:57-63-6	C#C[C]1(O)CC[CH]2[CH]3CCc4cc(O)ccc4[CH]3CC[C]21C	[*:1]Oc1ccc2c(c1)CCC1C2CCC2(C)C1CCC2(O)C#C	[*:1]C1CCCC1>>[*:1][H]	0.06	no
467	CAS:57-63-6	C#C[C]1(O)CC[CH]2[CH]3CCc4cc(O)ccc4[CH]3CC[C]21C	CAS:152-43-2	C#C[C]1(O)CC[CH]2[CH]3CCc4cc(OC5CCCC5)ccc4[CH]3CC[C]21C	[*:1]c1ccc2c(c1)CCC1C2CCC2(C)C1CCC2(O)C#C	[*:1]O>>[*:1]OC1CCCC1	0.06	no
468	CAS:14868-03-2	Oc1ccc(C(=C(Cl)Cl)c2ccc(O)cc2)cc1	CAS:2664-63-3	Oc1ccc(Sc2ccc(O)cc2)cc1	[*:1]c1ccc(O)cc1.[*:2]c1ccc(O)cc1	[*:1]C([*:2])=C(Cl)Cl>>[*:1]S[*:2]	0.06	no
469	CAS:6807-17-6	CC(C)CC(C)(c1ccc(O)cc1)c1ccc(O)cc1	CAS:2971-36-0	Oc1ccc(C(c2ccc(O)cc2)C(Cl)(Cl)Cl)cc1	[*:1]c1ccc(O)cc1.[*:2]c1ccc(O)cc1	[*:1]C([*:2])(C)CC(C)C>>[*:1]C([*:2])C(Cl)(Cl)Cl	0.06	no
470	CAS:100-29-8	CCOc1ccc([N+](=O)[O-])cc1	CAS:100-25-4	O=[N+]([O-])c1ccc([N+](=O)[O-])cc1	[*:1]c1ccc([N+](=O)[O-])cc1	[*:1]OCC>>[*:1][N+](=O)[O-]	0.06	no
471	CAS:2835-99-6	Cc1cc(O)ccc1N	CAS:95-53-4	Cc1ccccc1N	[*:1]c1ccc(N)c(C)c1	[*:1]O>>[*:1][H]	0.06	no
472	CAS:72-33-3	C#C[C]1(O)CC[CH]2[CH]3CCc4cc(OC)ccc4[CH]3CC[C]21C	CAS:152-43-2	C#C[C]1(O)CC[CH]2[CH]3CCc4cc(OC5CCCC5)ccc4[CH]3CC[C]21C	[*:1]Oc1ccc2c(c1)CCC1C2CCC2(C)C1CCC2(O)C#C	[*:1]C>>[*:1]C1CCCC1	0.05	no
473	CAS:72-33-3	C#C[C]1(O)CC[CH]2[CH]3CCc4cc(OC)ccc4[CH]3CC[C]21C	CAS:152-43-2	C#C[C]1(O)CC[CH]2[CH]3CCc4cc(OC5CCCC5)ccc4[CH]3CC[C]21C	[*:1]c1ccc2c(c1)CCC1C2CCC2(C)C1CCC2(O)C#C	[*:1]OC>>[*:1]OC1CCCC1	0.05	no
474	CAS:14868-03-2	Oc1ccc(C(=C(Cl)Cl)c2ccc(O)cc2)cc1	CAS:2971-36-0	Oc1ccc(C(c2ccc(O)cc2)C(Cl)(Cl)Cl)cc1	[*:3]Cl.[*:1]c1ccc(O)cc1.[*:2]c1ccc(O)cc1	[*:1]C([*:2])=C([*:3])Cl>>[*:1]C([*:2])C([*:3])(Cl)Cl	0.05	no
475	CAS:14868-03-2	Oc1ccc(C(=C(Cl)Cl)c2ccc(O)cc2)cc1	CAS:2971-36-0	Oc1ccc(C(c2ccc(O)cc2)C(Cl)(Cl)Cl)cc1	[*:1]c1ccc(O)cc1.[*:2]c1ccc(O)cc1	[*:1]C([*:2])=C(Cl)Cl>>[*:1]C([*:2])C(Cl)(Cl)Cl	0.05	no
476	CAS:6807-17-6	CC(C)CC(C)(c1ccc(O)cc1)c1ccc(O)cc1	CAS:2664-63-3	Oc1ccc(Sc2ccc(O)cc2)cc1	[*:1]c1ccc(O)cc1.[*:2]c1ccc(O)cc1	[*:1]C([*:2])(C)CC(C)C>>[*:1]S[*:2]	0.05	no
477	CAS:1689-82-3	Oc1ccc(/N=N/c2ccccc2)cc1	CAS:599-64-4	CC(C)(c1ccccc1)c1ccc(O)cc1	[*:1]c1ccc(O)cc1.[*:2]c1ccccc1	[*:1]/N=N\[*:2]>>[*:1]C([*:2])(C)C	0.05	no
478	CAS:843-55-0	Oc1ccc(C2(c3ccc(O)cc3)CCCCC2)cc1	CAS:2664-63-3	Oc1ccc(Sc2ccc(O)cc2)cc1	[*:1]c1ccc(O)cc1.[*:2]c1ccc(O)cc1	[*:1]C1([*:2])CCCCC1>>[*:1]S[*:2]	0.05	no
479	CAS:92-39-7	Clc1ccc2c(c1)Nc1ccccc1S2	CAS:92-84-2	c1ccc2c(c1)Nc1ccccc1S2	[*:1]c1ccc2c(c1)Nc1ccccc1S2	[*:1]Cl>>[*:1][H]	0.04	no
480	CAS:80-43-3	CC(C)(OOC(C)(C)c1ccccc1)c1ccccc1	CAS:2772-45-4	CC(C)(c1ccccc1)c1ccc(O)c(C(C)(C)c2ccccc2)c1	[*:1]C(C)(C)c1ccccc1.[*:2]C(C)(C)c1ccccc1	[*:1]OO[*:2]>>[*:1]c1ccc(O)c([*:2])c1	0.04	no
481	CAS:99-45-6	CNCC(=O)c1ccc(O)c(O)c1	CAS:51-43-4	CNC[CH](O)c1ccc(O)c(O)c1	[*:1]CNC.[*:2]c1ccc(O)c(O)c1	[*:1]C([*:2])=O>>[*:1]C([*:2])O	0.04	no
482	CAS:99-45-6	CNCC(=O)c1ccc(O)c(O)c1	CAS:51-43-4	CNC[CH](O)c1ccc(O)c(O)c1	[*:1]C.[*:2]c1ccc(O)c(O)c1	[*:1]NCC([*:2])=O>>[*:1]NCC([*:2])O	0.04	no
483	CAS:99-45-6	CNCC(=O)c1ccc(O)c(O)c1	CAS:51-43-4	CNC[CH](O)c1ccc(O)c(O)c1	[*:1]NC.[*:2]c1ccc(O)c(O)c1	[*:1]CC([*:2])=O>>[*:1]CC([*:2])O	0.04	no
484	CAS:599-64-4	CC(C)(c1ccccc1)c1ccc(O)cc1	CAS:1571-75-1	CC(c1ccccc1)(c1ccc(O)cc1)c1ccc(O)cc1	[*:1]C(C)(c1ccccc1)c1ccc(O)cc1	[*:1]C>>[*:1]c1ccc(O)cc1	0.04	no
485	CAS:2971-36-0	Oc1ccc(C(c2ccc(O)cc2)C(Cl)(Cl)Cl)cc1	CAS:843-55-0	Oc1ccc(C2(c3ccc(O)cc3)CCCCC2)cc1	[*:1]c1ccc(O)cc1.[*:2]c1ccc(O)cc1	[*:1]C([*:2])C(Cl)(Cl)Cl>>[*:1]C1([*:2])CCCCC1	0.04	no
486	CAS:27955-94-8	CC(c1ccc(O)cc1)(c1ccc(O)cc1)c1ccc(O)cc1	CAS:1571-75-1	CC(c1ccccc1)(c1ccc(O)cc1)c1ccc(O)cc1	[*:1]C(C)(c1ccc(O)cc1)c1ccc(O)cc1	[*:1]c1ccc(O)cc1>>[*:1]c1ccccc1	0.03	no
487	CAS:27955-94-8	CC(c1ccc(O)cc1)(c1ccc(O)cc1)c1ccc(O)cc1	CAS:1571-75-1	CC(c1ccccc1)(c1ccc(O)cc1)c1ccc(O)cc1	[*:1]c1ccc(C(C)(c2ccc(O)cc2)c2ccc(O)cc2)cc1	[*:1]O>>[*:1][H]	0.03	no
488	CAS:1861-40-1	CCCCN(CC)c1c([N+](=O)[O-])cc(C(F)(F)F)cc1[N+](=O)[O-]	CAS:26399-36-0	CCCN(CC1CC1)c1c([N+](=O)[O-])cc(C(F)(F)F)cc1[N+](=O)[O-]	[*:1]c1c([N+](=O)[O-])cc(C(F)(F)F)cc1[N+](=O)[O-]	[*:1]N(CC)CCCC>>[*:1]N(CCC)CC1CC1	0.03	no
489	CAS:5836-10-2	CC(C)OC(=O)C(O)(c1ccc(Cl)cc1)c1ccc(Cl)cc1	CAS:17781-31-6	OC(c1ccc(Cl)cc1)(c1ccc(Cl)cc1)c1cccnc1	[*:1]C(O)(c1ccc(Cl)cc1)c1ccc(Cl)cc1	[*:1]C(=O)OC(C)C>>[*:1]c1cccnc1	0.03	no
490	CAS:5836-10-2	CC(C)OC(=O)C(O)(c1ccc(Cl)cc1)c1ccc(Cl)cc1	CAS:17781-31-6	OC(c1ccc(Cl)cc1)(c1ccc(Cl)cc1)c1cccnc1	[*:1]O.[*:2]c1ccc(Cl)cc1.[*:3]c1ccc(Cl)cc1	[*:1]C([*:2])([*:3])C(=O)OC(C)C>>[*:1]C([*:2])([*:3])c1cccnc1	0.03	no
491	CAS:13360-45-7	CON(C)C(=O)Nc1ccc(Br)c(Cl)c1	CAS:330-55-2	CON(C)C(=O)Nc1ccc(Cl)c(Cl)c1	[*:1]c1ccc(NC(=O)N(C)OC)cc1Cl	[*:1]Br>>[*:1]Cl	0.03	no
492	CAS:5836-10-2	CC(C)OC(=O)C(O)(c1ccc(Cl)cc1)c1ccc(Cl)cc1	CAS:510-15-6	CCOC(=O)C(O)(c1ccc(Cl)cc1)c1ccc(Cl)cc1	[*:1]C(O)(c1ccc(Cl)cc1)c1ccc(Cl)cc1	[*:1]C(=O)OC(C)C>>[*:1]C(=O)OCC	0.03	no
493	CAS:5836-10-2	CC(C)OC(=O)C(O)(c1ccc(Cl)cc1)c1ccc(Cl)cc1	CAS:510-15-6	CCOC(=O)C(O)(c1ccc(Cl)cc1)c1ccc(Cl)cc1	[*:1]OC(=O)C(O)(c1ccc(Cl)cc1)c1ccc(Cl)cc1	[*:1]C(C)C>>[*:1]CC	0.03	no
494	CAS:5836-10-2	CC(C)OC(=O)C(O)(c1ccc(Cl)cc1)c1ccc(Cl)cc1	CAS:510-15-6	CCOC(=O)C(O)(c1ccc(Cl)cc1)c1ccc(Cl)cc1	[*:1][C@H](C)OC(=O)C(O)(c1ccc(Cl)cc1)c1ccc(Cl)cc1	[*:1]C>>[*:1][H]	0.03	no
495	CAS:5836-10-2	CC(C)OC(=O)C(O)(c1ccc(Cl)cc1)c1ccc(Cl)cc1	CAS:510-15-6	CCOC(=O)C(O)(c1ccc(Cl)cc1)c1ccc(Cl)cc1	[*:1][C@@H](C)OC(=O)C(O)(c1ccc(Cl)cc1)c1ccc(Cl)cc1	[*:1]C>>[*:1][H]	0.03	no
496	CAS:5836-10-2	CC(C)OC(=O)C(O)(c1ccc(Cl)cc1)c1ccc(Cl)cc1	CAS:510-15-6	CCOC(=O)C(O)(c1ccc(Cl)cc1)c1ccc(Cl)cc1	[*:1]O.[*:2]c1ccc(Cl)cc1.[*:3]c1ccc(Cl)cc1	[*:1]C([*:2])([*:3])C(=O)OC(C)C>>[*:1]C([*:2])([*:3])C(=O)OCC	0.03	no
497	CAS:5836-10-2	CC(C)OC(=O)C(O)(c1ccc(Cl)cc1)c1ccc(Cl)cc1	CAS:510-15-6	CCOC(=O)C(O)(c1ccc(Cl)cc1)c1ccc(Cl)cc1	[*:1]C(C)OC(=O)C(O)(c1ccc(Cl)cc1)c1ccc(Cl)cc1	[*:1]C>>[*:1][H]	0.03	no
498	CAS:2648-61-5	O=C(c1ccccc1)C(Cl)Cl	CAS:532-27-4	O=C(CCl)c1ccccc1	[*:1]C(=O)c1ccccc1	[*:1]C(Cl)Cl>>[*:1]CCl	0.03	no
499	CAS:2648-61-5	O=C(c1ccccc1)C(Cl)Cl	CAS:532-27-4	O=C(CCl)c1ccccc1	[*:1]C(=O)c1ccccc1.[*:2]Cl	[*:1]C([*:2])Cl>>[*:1]C[*:2]	0.03	no
500	CAS:2648-61-5	O=C(c1ccccc1)C(Cl)Cl	CAS:532-27-4	O=C(CCl)c1ccccc1	[*:1][C@@H](Cl)C(=O)c1ccccc1	[*:1]Cl>>[*:1][H]	0.03	no
501	CAS:2648-61-5	O=C(c1ccccc1)C(Cl)Cl	CAS:532-27-4	O=C(CCl)c1ccccc1	[*:1]C(Cl)C(=O)c1ccccc1	[*:1]Cl>>[*:1][H]	0.03	no
502	CAS:2648-61-5	O=C(c1ccccc1)C(Cl)Cl	CAS:532-27-4	O=C(CCl)c1ccccc1	[*:1][C@H](Cl)C(=O)c1ccccc1	[*:1]Cl>>[*:1][H]	0.03	no
503	CAS:603-33-8	c1ccc([Bi](c2ccccc2)c2ccccc2)cc1	CAS:791-31-1	O[Si](c1ccccc1)(c1ccccc1)c1ccccc1	[*:1]c1ccccc1.[*:2]c1ccccc1.[*:3]c1ccccc1	[*:1][Bi]([*:2])[*:3]>>[*:1][Si]([*:2])([*:3])O	0.03	no
504	CID:6528	Cc1ccc(OP(=O)(Oc2ccccc2)Oc2ccccc2)cc1	CID:158333	CC(C)(C)c1ccccc1OP(=O)(Oc1ccccc1)Oc1ccccc1	[*:2]C.[*:1]OP(=O)(Oc1ccccc1)Oc1ccccc1	[*:1]c1ccc([*:2])cc1>>[*:1]c1ccccc1C([*:2])(C)C	0.02	no
505	CAS:379-52-2	F[Sn](c1ccccc1)(c1ccccc1)c1ccccc1	CAS:76-87-9	O[Sn](c1ccccc1)(c1ccccc1)c1ccccc1	[*:1]c1ccccc1.[*:2]c1ccccc1.[*:3]c1ccccc1	[*:1][Sn]([*:2])([*:3])F>>[*:1][Sn]([*:2])([*:3])O	0.02	no
506	CAS:26399-36-0	CCCN(CC1CC1)c1c([N+](=O)[O-])cc(C(F)(F)F)cc1[N+](=O)[O-]	CAS:1582-09-8	CCCN(CCC)c1c([N+](=O)[O-])cc(C(F)(F)F)cc1[N+](=O)[O-]	[*:1]CCC.[*:2]c1c([N+](=O)[O-])cc(C(F)(F)F)cc1[N+](=O)[O-]	[*:1]N([*:2])CC1CC1>>[*:1]N([*:2])CCC	0.02	no
507	CAS:26399-36-0	CCCN(CC1CC1)c1c([N+](=O)[O-])cc(C(F)(F)F)cc1[N+](=O)[O-]	CAS:1582-09-8	CCCN(CCC)c1c([N+](=O)[O-])cc(C(F)(F)F)cc1[N+](=O)[O-]	[*:1]N(CCC)c1c([N+](=O)[O-])cc(C(F)(F)F)cc1[N+](=O)[O-]	[*:1]CC1CC1>>[*:1]CCC	0.02	no
508	CAS:26399-36-0	CCCN(CC1CC1)c1c([N+](=O)[O-])cc(C(F)(F)F)cc1[N+](=O)[O-]	CAS:1582-09-8	CCCN(CCC)c1c([N+](=O)[O-])cc(C(F)(F)F)cc1[N+](=O)[O-]	[*:1]c1c([N+](=O)[O-])cc(C(F)(F)F)cc1[N+](=O)[O-]	[*:1]N(CCC)CC1CC1>>[*:1]N(CCC)CCC	0.02	no
509	CAS:33820-53-0	CCCN(CCC)c1c([N+](=O)[O-])cc(C(C)C)cc1[N+](=O)[O-]	CAS:1582-09-8	CCCN(CCC)c1c([N+](=O)[O-])cc(C(F)(F)F)cc1[N+](=O)[O-]	[*:1]c1cc([N+](=O)[O-])c(N(CCC)CCC)c([N+](=O)[O-])c1	[*:1]C(C)C>>[*:1]C(F)(F)F	0.02	no
510	CAS:60-87-7	CC(CN1c2ccccc2Sc2ccccc21)N(C)C	CAS:92-84-2	c1ccc2c(c1)Nc1ccccc1S2	[*:1]N1c2ccccc2Sc2ccccc21	[*:1]CC(C)N(C)C>>[*:1][H]	0.02	no
511	CAS:104-43-8	CCCCCCCCCCCCc1ccc(O)cc1	CID:171144	CCCCCCCCCCCCc1ccccc1O	[*:1]CCCCCCCCCCCC.[*:2]O	[*:1]c1ccc([*:2])cc1>>[*:1]c1ccccc1[*:2]	0.01	no
512	CAS:14868-03-2	Oc1ccc(C(=C(Cl)Cl)c2ccc(O)cc2)cc1	CAS:843-55-0	Oc1ccc(C2(c3ccc(O)cc3)CCCCC2)cc1	[*:1]c1ccc(O)cc1.[*:2]c1ccc(O)cc1	[*:1]C([*:2])=C(Cl)Cl>>[*:1]C1([*:2])CCCCC1	0.01	no
513	CAS:51218-45-2	CCc1cccc(C)c1N(C(=O)CCl)C(C)COC	CAS:87392-12-9	CCc1cccc(C)c1N(C(=O)CCl)[CH](C)COC	[*:1]C.[*:2]N(C(=O)CCl)c1c(C)cccc1CC	[*:1]C([*:2])COC>>[*:1]OCC([*:2])C	0.01	no
514	CAS:1861-40-1	CCCCN(CC)c1c([N+](=O)[O-])cc(C(F)(F)F)cc1[N+](=O)[O-]	CAS:1582-09-8	CCCN(CCC)c1c([N+](=O)[O-])cc(C(F)(F)F)cc1[N+](=O)[O-]	[*:1]c1c([N+](=O)[O-])cc(C(F)(F)F)cc1[N+](=O)[O-]	[*:1]N(CC)CCCC>>[*:1]N(CCC)CCC	0.01	no
515	CAS:2971-36-0	Oc1ccc(C(c2ccc(O)cc2)C(Cl)(Cl)Cl)cc1	CAS:2664-63-3	Oc1ccc(Sc2ccc(O)cc2)cc1	[*:1]c1ccc(O)cc1.[*:2]c1ccc(O)cc1	[*:1]C([*:2])C(Cl)(Cl)Cl>>[*:1]S[*:2]	0.01	no
516	CAS:4759-48-2	CC1=C(/C=C/C(C)=C/C=C/C(C)=C\C(=O)O)C(C)(C)CCC1	CAS:472-86-6	CC1=C(/C=C/C(C)=C/C=C/C(C)=C\C=O)C(C)(C)CCC1	[*:1]/C=C(C)\C=C\C=C(C)\C=C\C1=C(C)CCCC1(C)C	[*:1]C(=O)O>>[*:1]C=O	0.01	no
517	CAS:4759-48-2	CC1=C(/C=C/C(C)=C/C=C/C(C)=C\C(=O)O)C(C)(C)CCC1	CAS:472-86-6	CC1=C(/C=C/C(C)=C/C=C/C(C)=C\C=O)C(C)(C)CCC1	[*:1]/C=C/C=C(C)/C=C/C1=C(C)CCCC1(C)C.[*:2]C	[*:1]C([*:2])=CC(=O)O>>[*:1]C([*:2])=CC=O	0.01	no
518	CAS:4759-48-2	CC1=C(/C=C/C(C)=C/C=C/C(C)=C\C(=O)O)C(C)(C)CCC1	CAS:472-86-6	CC1=C(/C=C/C(C)=C/C=C/C(C)=C\C=O)C(C)(C)CCC1	[*:1]/C=C(C)/C=C/C1=C(C)CCCC1(C)C.[*:2]C	[*:1]/C=C\C([*:2])=C/C(=O)O>>[*:1]/C=C\C([*:2])=C/C=O	0.01	no
519	CAS:4759-48-2	CC1=C(/C=C/C(C)=C/C=C/C(C)=C\C(=O)O)C(C)(C)CCC1	CAS:472-86-6	CC1=C(/C=C/C(C)=C/C=C/C(C)=C\C=O)C(C)(C)CCC1	[*:1]/C=C/C=C(C)/C=C/C1=C(C)CCCC1(C)C	[*:1]/C(C)=C/C(=O)O>>[*:1]/C(C)=C/C=O	0.01	no
520	CAS:56-53-1	CC/C(=C(/CC)c1ccc(O)cc1)c1ccc(O)cc1	CAS:80-05-7	CC(C)(c1ccc(O)cc1)c1ccc(O)cc1	[*:1]c1ccc(O)cc1.[*:2]c1ccc(O)cc1	[*:1]/C(CC)=C(/[*:2])CC>>[*:1]C([*:2])(C)C	0.01	no
521	CAS:52-76-6	C#C[C]1(O)CC[CH]2[CH]3CCC4=CCCC[CH]4[CH]3CC[C]21C	CAS:965-90-2	CC[C]1(O)CC[CH]2[CH]3CCC4=CCCC[CH]4[CH]3CC[C]21C	[*:1]C1(O)CCC2C3CCC4=CCCCC4C3CCC21C	[*:1]C#C>>[*:1]CC	0.01	no
522	CAS:510-15-6	CCOC(=O)C(O)(c1ccc(Cl)cc1)c1ccc(Cl)cc1	CAS:17781-31-6	OC(c1ccc(Cl)cc1)(c1ccc(Cl)cc1)c1cccnc1	[*:1]O.[*:2]c1ccc(Cl)cc1.[*:3]c1ccc(Cl)cc1	[*:1]C([*:2])([*:3])C(=O)OCC>>[*:1]C([*:2])([*:3])c1cccnc1	0	no
523	CAS:510-15-6	CCOC(=O)C(O)(c1ccc(Cl)cc1)c1ccc(Cl)cc1	CAS:17781-31-6	OC(c1ccc(Cl)cc1)(c1ccc(Cl)cc1)c1cccnc1	[*:1]C(O)(c1ccc(Cl)cc1)c1ccc(Cl)cc1	[*:1]C(=O)OCC>>[*:1]c1cccnc1	0	no

## Sheet: Table S6
Table S6: Activity cliff classification of 69 activity cliff pairs identified in the TSHR antagonist dataset. For each chemical pair, the table provides the chemical identifiers, computed chemical similarity by using the Tanimoto coefficient between the ECFP4 fingerprints, activity cliff classification using the workflow (Figure 1d) and formation of MMP-cliff. Note that the Tanimoto similarity an…
Serial Number	First Chemical Identifier	Second Chemical Identifier	Tanimoto Similarity	Activity Difference (ΔpAC50)	Activity Cliff Classification	MMP-cliff
1	CAS:578-54-1	CAS:7756-96-9	0.42	5.82	R-group cliff	No
2	CAS:58-27-5	CID:8981	0.36	4.94	Unclassified	No
3	CAS:1210-12-4	CAS:1468-95-7	0.68	4.55	R-group cliff	Yes
4	CAS:1468-95-7	CAS:2052-07-5	0.39	4.55	Unclassified	No
5	CAS:139-66-2	CAS:1468-95-7	0.37	4.37	Unclassified	No
6	CAS:40796-97-2	CAS:51-36-5	0.39	4.31	Unclassified	No
7	CAS:1468-95-7	CAS:3118-97-6	0.35	4.29	Unclassified	No
8	CID:460	CAS:481-85-6	0.36	4.27	Unclassified	No
9	CAS:1468-95-7	CAS:2113-57-7	0.37	4.27	Unclassified	No
10	CAS:50-45-3	CAS:83-38-5	0.44	4.25	R-group cliff	No
11	CAS:50-45-3	CAS:89-75-8	0.41	4.13	R-group cliff	No
12	CAS:1468-95-7	CAS:835-11-0	0.37	4.13	Unclassified	No
13	CAS:1468-95-7	CAS:451-40-1	0.36	4.02	Unclassified	No
14	CAS:1468-95-7	CAS:4273-98-7	0.35	4.02	Unclassified	No
15	CAS:1468-95-7	CAS:321-60-8	0.39	4.01	Unclassified	No
16	CAS:1468-95-7	CAS:3586-14-9	0.35	4.01	Unclassified	No
17	CAS:1468-95-7	CAS:86-00-0	0.36	3.92	Unclassified	No
18	CAS:118-58-1	CAS:1468-95-7	0.37	3.92	Unclassified	No
19	CAS:1468-95-7	CAS:6051-87-2	0.4	3.91	Unclassified	No
20	CAS:35065-27-1	CAS:70-30-4	0.41	3.9	Unclassified	No
21	CAS:1468-95-7	CAS:90-41-5	0.39	3.84	Unclassified	No
22	CAS:132-54-7	CAS:1468-95-7	0.42	3.84	Unclassified	No
23	CAS:5407-98-7	CAS:613-94-5	0.48	3.78	Unclassified	No
24	CAS:1468-95-7	CAS:2531-84-2	0.49	3.76	Unclassified	No
25	CAS:1468-95-7	CAS:538-74-9	0.35	3.68	Unclassified	No
26	CAS:135-62-6	CAS:1468-95-7	0.41	3.67	Unclassified	No
27	CID:460	CAS:533-75-5	0.47	3.65	Unclassified	No
28	CAS:1468-95-7	CAS:886-08-8	0.38	3.65	Unclassified	No
29	CAS:1468-95-7	CAS:573-17-1	0.6	3.58	Unclassified	No
30	CAS:1468-95-7	CAS:481-85-6	0.36	3.52	Unclassified	No
31	CAS:103-29-7	CAS:1468-95-7	0.37	3.48	Unclassified	No
32	CAS:134-84-9	CAS:613-94-5	0.39	3.36	Unclassified	No
33	CAS:1470-57-1	CAS:613-94-5	0.38	3.35	Unclassified	No
34	CAS:613-94-5	CAS:85-19-8	0.38	3.33	Unclassified	No
35	CAS:613-94-5	CAS:719-59-5	0.4	3.31	Unclassified	No
36	CAS:451-40-1	CAS:613-94-5	0.38	3.29	Unclassified	No
37	CAS:100-56-1	CAS:613-94-5	0.38	3.23	R-group cliff	No
38	CAS:3236-71-3	CAS:84-15-1	0.37	3.2	Unclassified	No
39	CAS:13029-08-8	CAS:1468-95-7	0.38	3.15	Unclassified	No
40	CAS:613-94-5	CAS:6789-88-4	0.39	3.15	R-group cliff	No
41	CAS:613-94-5	CAS:705-60-2	0.36	3.13	R-group cliff	No
42	CAS:1671-75-6	CAS:613-94-5	0.42	3.09	R-group cliff	No
43	CAS:613-94-5	CAS:62-38-4	0.4	3.05	R-group cliff	No
44	CAS:122-64-5	CAS:613-94-5	0.36	3	R-group cliff	No
45	CAS:25152-85-6	CAS:613-94-5	0.39	2.99	R-group cliff	No
46	CAS:5444-75-7	CAS:613-94-5	0.36	2.99	R-group cliff	No
47	CAS:134-85-0	CAS:613-94-5	0.39	2.96	Unclassified	No
48	CAS:2152-44-5	CAS:25122-57-0	0.63	2.75	Unclassified	No
49	CAS:25122-57-0	CAS:33755-46-3	0.63	2.7	Unclassified	No
50	CAS:201530-41-8	CAS:3236-71-3	0.38	2.68	Unclassified	No
51	CAS:100-42-5	CAS:645-49-8	0.38	2.62	Unclassified	No
52	CAS:2381-21-7	CAS:3331-46-2	0.53	2.52	Unclassified	No
53	CAS:25122-57-0	CAS:76738-96-0	0.37	2.5	Unclassified	No
54	CAS:100-42-5	CAS:100-56-1	0.44	2.48	R-group cliff	Yes
55	CAS:100-42-5	CAS:7779-65-9	0.36	2.47	R-group cliff	No
56	CAS:613-94-5	CAS:637-03-6	0.42	2.46	R-group cliff	No
57	CAS:1210-12-4	CAS:215-58-7	0.45	2.45	Unclassified	No
58	CAS:2265-64-7	CAS:25122-57-0	0.45	2.39	Unclassified	No
59	CAS:100-42-5	CAS:705-60-2	0.47	2.38	R-group cliff	No
60	CAS:2381-21-7	CAS:3118-97-6	0.38	2.27	Unclassified	No
61	CAS:35189-28-7	CAS:57-85-2	0.35	2.19	Scaffold/R-group cliff	No
62	CAS:25122-57-0	CAS:4419-39-0	0.46	2.18	Unclassified	No
63	CAS:533-75-5	CAS:613-94-5	0.39	2.18	Unclassified	No
64	CAS:215-58-7	CAS:603-36-1	0.4	2.16	Unclassified	No
65	CAS:135-57-9	CAS:603-36-1	0.37	2.12	Unclassified	No
66	CAS:1468-95-7	CAS:215-58-7	0.45	2.1	Unclassified	No
67	CAS:100-42-5	CAS:122-67-8	0.38	2.07	R-group cliff	No
68	CAS:100-42-5	CAS:102-96-5	0.5	2.07	R-group cliff	Yes
69	CAS:115-33-3	CAS:3236-71-3	0.38	2.06	Unclassified	No

## Sheet: Table S7
Table S7: List of 4 activity cliff generators (ACGs) identified using the SAS map in the TSHR antagonist dataset. For each ACG, the table provides the chemicals which form activity cliffs (separated by '|' symbol) and the number of activity cliff pairs.
Serial Number	Activity Cliff Generator	Chemical Identifiers	Number of Activity Cliff Pairs
1	CAS:1468-95-7	CAS:139-66-2|CAS:132-54-7|CAS:6051-87-2|CAS:118-58-1|CAS:135-62-6|CAS:86-00-0|CAS:321-60-8|CAS:886-08-8|CAS:835-11-0|CAS:451-40-1|CAS:90-41-5|CAS:215-58-7|CAS:2113-57-7|CAS:573-17-1|CAS:3118-97-6|CAS:13029-08-8|CAS:103-29-7|CAS:2052-07-5|CAS:1210-12-4|CAS:481-85-6|CAS:4273-98-7|CAS:3586-14-9|CAS:538-74-9|CAS:2531-84-2	24
2	CAS:613-94-5	CAS:1470-57-1|CAS:451-40-1|CAS:62-38-4|CAS:134-85-0|CAS:122-64-5|CAS:533-75-5|CAS:637-03-6|CAS:1671-75-6|CAS:134-84-9|CAS:5444-75-7|CAS:85-19-8|CAS:25152-85-6|CAS:6789-88-4|CAS:705-60-2|CAS:719-59-5|CAS:100-56-1|CAS:5407-98-7	17
3	CAS:100-42-5	CAS:645-49-8|CAS:102-96-5|CAS:122-67-8|CAS:705-60-2|CAS:100-56-1|CAS:7779-65-9	6
4	CAS:25122-57-0	CAS:2265-64-7|CAS:76738-96-0|CAS:4419-39-0|CAS:33755-46-3|CAS:2152-44-5	5

## Sheet: Table S8
Table S8: List of 590 matched molecular pairs (MMPs) identified in the TSHR antagonist dataset. For each MMP, the table provides the chemical identifiers, chemical SMILES (after performing canonicalization in RDKit and removing stereoisomer information) which was then used as input SMILES in mmpdb platform in order to generate MMPs, generated constant part and transformation between the chemical …
Serial Number	First Chemical Identifier	First Chemical SMILES	Second Chemical Identifier	Second Chemical SMILES	Constant Part	Transformation	Activity Difference (ΔpAC50)	MMP-cliff
1	CAS:1210-12-4	N#Cc1c2ccccc2cc2ccccc12	CAS:1468-95-7	OCc1c2ccccc2cc2ccccc12	[*:1]c1c2ccccc2cc2ccccc12	[*:1]C#N>>[*:1]CO	4.55	yes
2	CAS:100-42-5	C=Cc1ccccc1	CAS:100-56-1	Cl[Hg]c1ccccc1	[*:1]c1ccccc1	[*:1]C=C>>[*:1][Hg]Cl	2.48	yes
3	CAS:102-96-5	O=[N+]([O-])C=Cc1ccccc1	CAS:100-42-5	C=Cc1ccccc1	[*:1]C=Cc1ccccc1	[*:1][N+](=O)[O-]>>[*:1][H]	2.07	yes
4	CAS:100-42-5	C=Cc1ccccc1	CAS:637-03-6	O=[As]c1ccccc1	[*:1]c1ccccc1	[*:1]C=C>>[*:1][As]=O	1.71	no
5	CAS:66230-04-4	CC(C)[CH](C(=O)O[CH](C#N)c1cccc(Oc2ccccc2)c1)c1ccc(Cl)cc1	CAS:39515-41-8	CC1(C)C(C(=O)OC(C#N)c2cccc(Oc3ccccc3)c2)C1(C)C	[*:2]C.[*:1]C(=O)OC(C#N)c1cccc(Oc2ccccc2)c1	[*:1]C(c1ccc(Cl)cc1)[C@@H]([*:2])C>>[*:1]C1C([*:2])(C)C1(C)C	1.7	no
6	CAS:66230-04-4	CC(C)[CH](C(=O)O[CH](C#N)c1cccc(Oc2ccccc2)c1)c1ccc(Cl)cc1	CAS:39515-41-8	CC1(C)C(C(=O)OC(C#N)c2cccc(Oc3ccccc3)c2)C1(C)C	[*:1]C.[*:2]C(=O)OC(C#N)c1cccc(Oc2ccccc2)c1	[*:1]C(C)C([*:2])c1ccc(Cl)cc1>>[*:2][C@H]1C([*:1])(C)C1(C)C	1.7	no
7	CAS:66230-04-4	CC(C)[CH](C(=O)O[CH](C#N)c1cccc(Oc2ccccc2)c1)c1ccc(Cl)cc1	CAS:39515-41-8	CC1(C)C(C(=O)OC(C#N)c2cccc(Oc3ccccc3)c2)C1(C)C	[*:1]C.[*:2]C.[*:3]C(=O)OC(C#N)c1cccc(Oc2ccccc2)c1	[*:1]C([*:2])C([*:3])c1ccc(Cl)cc1>>[*:3]C1C([*:1])(C)C1([*:2])C	1.7	no
8	CAS:66230-04-4	CC(C)[CH](C(=O)O[CH](C#N)c1cccc(Oc2ccccc2)c1)c1ccc(Cl)cc1	CAS:39515-41-8	CC1(C)C(C(=O)OC(C#N)c2cccc(Oc3ccccc3)c2)C1(C)C	[*:1]C.[*:2]C(=O)OC(C#N)c1cccc(Oc2ccccc2)c1	[*:1]C(C)C([*:2])c1ccc(Cl)cc1>>[*:2]C1C(C)(C)[C@]1([*:1])C	1.7	no
9	CAS:66230-04-4	CC(C)[CH](C(=O)O[CH](C#N)c1cccc(Oc2ccccc2)c1)c1ccc(Cl)cc1	CAS:39515-41-8	CC1(C)C(C(=O)OC(C#N)c2cccc(Oc3ccccc3)c2)C1(C)C	[*:1]C.[*:2]C(=O)OC(C#N)c1cccc(Oc2ccccc2)c1	[*:1]C(C)C([*:2])c1ccc(Cl)cc1>>[*:2][C@@H]1C([*:1])(C)C1(C)C	1.7	no
10	CAS:66230-04-4	CC(C)[CH](C(=O)O[CH](C#N)c1cccc(Oc2ccccc2)c1)c1ccc(Cl)cc1	CAS:39515-41-8	CC1(C)C(C(=O)OC(C#N)c2cccc(Oc3ccccc3)c2)C1(C)C	[*:1]C.[*:2]C.[*:3]C(=O)OC(C#N)c1cccc(Oc2ccccc2)c1	[*:1]C([*:2])C([*:3])c1ccc(Cl)cc1>>[*:3][C@@H]1C([*:1])([*:2])C1(C)C	1.7	no
11	CAS:66230-04-4	CC(C)[CH](C(=O)O[CH](C#N)c1cccc(Oc2ccccc2)c1)c1ccc(Cl)cc1	CAS:39515-41-8	CC1(C)C(C(=O)OC(C#N)c2cccc(Oc3ccccc3)c2)C1(C)C	[*:1]C.[*:2]C.[*:3]C(=O)OC(C#N)c1cccc(Oc2ccccc2)c1	[*:1]C([*:2])C([*:3])c1ccc(Cl)cc1>>[*:3][C@H]1C([*:1])([*:2])C1(C)C	1.7	no
12	CAS:66230-04-4	CC(C)[CH](C(=O)O[CH](C#N)c1cccc(Oc2ccccc2)c1)c1ccc(Cl)cc1	CAS:39515-41-8	CC1(C)C(C(=O)OC(C#N)c2cccc(Oc3ccccc3)c2)C1(C)C	[*:1]C.[*:2]C.[*:3]C(=O)OC(C#N)c1cccc(Oc2ccccc2)c1	[*:1]C([*:2])C([*:3])c1ccc(Cl)cc1>>[*:3]C1C([*:1])([*:2])C1(C)C	1.7	no
13	CAS:66230-04-4	CC(C)[CH](C(=O)O[CH](C#N)c1cccc(Oc2ccccc2)c1)c1ccc(Cl)cc1	CAS:39515-41-8	CC1(C)C(C(=O)OC(C#N)c2cccc(Oc3ccccc3)c2)C1(C)C	[*:1]C.[*:2]C.[*:3]C(=O)OC(C#N)c1cccc(Oc2ccccc2)c1	[*:1]C([*:2])C([*:3])c1ccc(Cl)cc1>>[*:3]C1C([*:1])(C)[C@@]1([*:2])C	1.7	no
14	CAS:66230-04-4	CC(C)[CH](C(=O)O[CH](C#N)c1cccc(Oc2ccccc2)c1)c1ccc(Cl)cc1	CAS:39515-41-8	CC1(C)C(C(=O)OC(C#N)c2cccc(Oc3ccccc3)c2)C1(C)C	[*:1]C.[*:2]C.[*:3]C(=O)OC(C#N)c1cccc(Oc2ccccc2)c1	[*:1]C([*:2])C([*:3])c1ccc(Cl)cc1>>[*:3]C1C([*:1])(C)[C@]1([*:2])C	1.7	no
15	CAS:66230-04-4	CC(C)[CH](C(=O)O[CH](C#N)c1cccc(Oc2ccccc2)c1)c1ccc(Cl)cc1	CAS:39515-41-8	CC1(C)C(C(=O)OC(C#N)c2cccc(Oc3ccccc3)c2)C1(C)C	[*:1]C.[*:2]C(=O)OC(C#N)c1cccc(Oc2ccccc2)c1	[*:1]C(C)C([*:2])c1ccc(Cl)cc1>>[*:2]C1C([*:1])(C)C1(C)C	1.7	no
16	CAS:66230-04-4	CC(C)[CH](C(=O)O[CH](C#N)c1cccc(Oc2ccccc2)c1)c1ccc(Cl)cc1	CAS:39515-41-8	CC1(C)C(C(=O)OC(C#N)c2cccc(Oc3ccccc3)c2)C1(C)C	[*:1]C.[*:2]C(=O)OC(C#N)c1cccc(Oc2ccccc2)c1	[*:1]C(C)C([*:2])c1ccc(Cl)cc1>>[*:2]C1C(C)(C)[C@@]1([*:1])C	1.7	no
17	CAS:66230-04-4	CC(C)[CH](C(=O)O[CH](C#N)c1cccc(Oc2ccccc2)c1)c1ccc(Cl)cc1	CAS:39515-41-8	CC1(C)C(C(=O)OC(C#N)c2cccc(Oc3ccccc3)c2)C1(C)C	[*:2]C.[*:1]C(=O)OC(C#N)c1cccc(Oc2ccccc2)c1	[*:1]C(c1ccc(Cl)cc1)[C@H]([*:2])C>>[*:1]C1C([*:2])(C)C1(C)C	1.7	no
18	CAS:66230-04-4	CC(C)[CH](C(=O)O[CH](C#N)c1cccc(Oc2ccccc2)c1)c1ccc(Cl)cc1	CAS:67375-30-8	CC1(C)[CH](C=C(Cl)Cl)[CH]1C(=O)O[CH](C#N)c1cccc(Oc2ccccc2)c1	[*:1]C.[*:2]C(=O)OC(C#N)c1cccc(Oc2ccccc2)c1	[*:1]C(C)C([*:2])c1ccc(Cl)cc1>>[*:2]C1C(C=C(Cl)Cl)[C@@]1([*:1])C	1.55	no
19	CAS:67375-30-8	CC1(C)[CH](C=C(Cl)Cl)[CH]1C(=O)O[CH](C#N)c1cccc(Oc2ccccc2)c1	CAS:66230-04-4	CC(C)[CH](C(=O)O[CH](C#N)c1cccc(Oc2ccccc2)c1)c1ccc(Cl)cc1	[*:3]C.[*:2]C(=O)OC(C#N)c1cccc(Oc2ccccc2)c1.[*:1]Cl	[*:1]C(Cl)=CC1C([*:2])C1([*:3])C>>[*:1]c1ccc(C([*:2])[C@H]([*:3])C)cc1	1.55	no
20	CAS:67375-30-8	CC1(C)[CH](C=C(Cl)Cl)[CH]1C(=O)O[CH](C#N)c1cccc(Oc2ccccc2)c1	CAS:66230-04-4	CC(C)[CH](C(=O)O[CH](C#N)c1cccc(Oc2ccccc2)c1)c1ccc(Cl)cc1	[*:3]C.[*:2]C(=O)OC(C#N)c1cccc(Oc2ccccc2)c1.[*:1]Cl	[*:1]C(Cl)=CC1C([*:2])C1([*:3])C>>[*:1]c1ccc(C([*:2])C([*:3])C)cc1	1.55	no
21	CAS:67375-30-8	CC1(C)[CH](C=C(Cl)Cl)[CH]1C(=O)O[CH](C#N)c1cccc(Oc2ccccc2)c1	CAS:66230-04-4	CC(C)[CH](C(=O)O[CH](C#N)c1cccc(Oc2ccccc2)c1)c1ccc(Cl)cc1	[*:3]C.[*:2]C(=O)OC(C#N)c1cccc(Oc2ccccc2)c1.[*:1]Cl	[*:1]C(Cl)=CC1C([*:2])[C@@]1([*:3])C>>[*:1]c1ccc(C([*:2])C([*:3])C)cc1	1.55	no
22	CAS:66230-04-4	CC(C)[CH](C(=O)O[CH](C#N)c1cccc(Oc2ccccc2)c1)c1ccc(Cl)cc1	CAS:67375-30-8	CC1(C)[CH](C=C(Cl)Cl)[CH]1C(=O)O[CH](C#N)c1cccc(Oc2ccccc2)c1	[*:2]C.[*:1]C(=O)OC(C#N)c1cccc(Oc2ccccc2)c1	[*:1]C(c1ccc(Cl)cc1)[C@@H]([*:2])C>>[*:1]C1C(C=C(Cl)Cl)C1([*:2])C	1.55	no
23	CAS:66230-04-4	CC(C)[CH](C(=O)O[CH](C#N)c1cccc(Oc2ccccc2)c1)c1ccc(Cl)cc1	CAS:67375-30-8	CC1(C)[CH](C=C(Cl)Cl)[CH]1C(=O)O[CH](C#N)c1cccc(Oc2ccccc2)c1	[*:1]C.[*:2]C(=O)OC(C#N)c1cccc(Oc2ccccc2)c1	[*:1]C(C)C([*:2])c1ccc(Cl)cc1>>[*:2]C1C(C=C(Cl)Cl)[C@]1([*:1])C	1.55	no
24	CAS:66230-04-4	CC(C)[CH](C(=O)O[CH](C#N)c1cccc(Oc2ccccc2)c1)c1ccc(Cl)cc1	CAS:67375-30-8	CC1(C)[CH](C=C(Cl)Cl)[CH]1C(=O)O[CH](C#N)c1cccc(Oc2ccccc2)c1	[*:2]C.[*:1]C(=O)OC(C#N)c1cccc(Oc2ccccc2)c1	[*:1]C(c1ccc(Cl)cc1)[C@H]([*:2])C>>[*:1]C1C(C=C(Cl)Cl)C1([*:2])C	1.55	no
25	CAS:66230-04-4	CC(C)[CH](C(=O)O[CH](C#N)c1cccc(Oc2ccccc2)c1)c1ccc(Cl)cc1	CAS:67375-30-8	CC1(C)[CH](C=C(Cl)Cl)[CH]1C(=O)O[CH](C#N)c1cccc(Oc2ccccc2)c1	[*:1]C.[*:2]C.[*:3]C(=O)OC(C#N)c1cccc(Oc2ccccc2)c1	[*:1]C([*:2])C([*:3])c1ccc(Cl)cc1>>[*:3]C1C(C=C(Cl)Cl)C1([*:1])[*:2]	1.55	no
26	CAS:67375-30-8	CC1(C)[CH](C=C(Cl)Cl)[CH]1C(=O)O[CH](C#N)c1cccc(Oc2ccccc2)c1	CAS:66230-04-4	CC(C)[CH](C(=O)O[CH](C#N)c1cccc(Oc2ccccc2)c1)c1ccc(Cl)cc1	[*:3]C.[*:2]C(=O)OC(C#N)c1cccc(Oc2ccccc2)c1.[*:1]Cl	[*:1]C(Cl)=CC1C([*:2])[C@]1([*:3])C>>[*:1]c1ccc(C([*:2])C([*:3])C)cc1	1.55	no
27	CAS:67375-30-8	CC1(C)[CH](C=C(Cl)Cl)[CH]1C(=O)O[CH](C#N)c1cccc(Oc2ccccc2)c1	CAS:66230-04-4	CC(C)[CH](C(=O)O[CH](C#N)c1cccc(Oc2ccccc2)c1)c1ccc(Cl)cc1	[*:2]C(=O)OC(C#N)c1cccc(Oc2ccccc2)c1.[*:1]Cl	[*:1]C(Cl)=CC1C([*:2])C1(C)C>>[*:1]c1ccc(C([*:2])C(C)C)cc1	1.55	no
28	CAS:67375-30-8	CC1(C)[CH](C=C(Cl)Cl)[CH]1C(=O)O[CH](C#N)c1cccc(Oc2ccccc2)c1	CAS:66230-04-4	CC(C)[CH](C(=O)O[CH](C#N)c1cccc(Oc2ccccc2)c1)c1ccc(Cl)cc1	[*:3]C.[*:2]C(=O)OC(C#N)c1cccc(Oc2ccccc2)c1.[*:1]Cl	[*:1]C(Cl)=CC1C([*:2])C1([*:3])C>>[*:1]c1ccc(C([*:2])[C@@H]([*:3])C)cc1	1.55	no
29	CAS:66230-04-4	CC(C)[CH](C(=O)O[CH](C#N)c1cccc(Oc2ccccc2)c1)c1ccc(Cl)cc1	CAS:67375-30-8	CC1(C)[CH](C=C(Cl)Cl)[CH]1C(=O)O[CH](C#N)c1cccc(Oc2ccccc2)c1	[*:1]C.[*:2]C(=O)OC(C#N)c1cccc(Oc2ccccc2)c1	[*:1]C(C)C([*:2])c1ccc(Cl)cc1>>[*:2]C1C(C=C(Cl)Cl)C1([*:1])C	1.55	no
30	CAS:92-59-1	CCN(Cc1ccccc1)c1ccccc1	CAS:882-33-7	c1ccc(SSc2ccccc2)cc1	[*:1]c1ccccc1.[*:2]c1ccccc1	[*:1]CN([*:2])CC>>[*:1]SS[*:2]	1.32	no
31	CAS:622-20-8	c1ccc(SCCSc2ccccc2)cc1	CAS:882-33-7	c1ccc(SSc2ccccc2)cc1	[*:1]c1ccccc1.[*:2]c1ccccc1	[*:1]SCCS[*:2]>>[*:1]SS[*:2]	1.22	no
32	CAS:102-20-5	O=C(Cc1ccccc1)OCCc1ccccc1	CAS:92-59-1	CCN(Cc1ccccc1)c1ccccc1	[*:2]Cc1ccccc1.[*:1]c1ccccc1	[*:1]CCOC([*:2])=O>>[*:1]N([*:2])CC	1.17	no
33	CAS:102-20-5	O=C(Cc1ccccc1)OCCc1ccccc1	CAS:92-59-1	CCN(Cc1ccccc1)c1ccccc1	[*:1]c1ccccc1.[*:2]c1ccccc1	[*:1]CCOC(=O)C[*:2]>>[*:1]CN([*:2])CC	1.17	no
34	CAS:139-66-2	c1ccc(Sc2ccccc2)cc1	CAS:882-33-7	c1ccc(SSc2ccccc2)cc1	[*:1]c1ccccc1.[*:2]c1ccccc1	[*:1]S[*:2]>>[*:1]SS[*:2]	1.15	no
35	CAS:2409-55-4	Cc1ccc(O)c(C(C)(C)C)c1	CID:8456	COc1ccc(O)c(C(C)(C)C)c1	[*:1]c1ccc(O)c(C(C)(C)C)c1	[*:1]C>>[*:1]OC	1.11	no
36	CAS:603-36-1	c1ccc([Sb](c2ccccc2)c2ccccc2)cc1	CAS:639-58-7	Cl[Sn](c1ccccc1)(c1ccccc1)c1ccccc1	[*:1]c1ccccc1.[*:2]c1ccccc1.[*:3]c1ccccc1	[*:1][Sb]([*:2])[*:3]>>[*:1][Sn]([*:2])([*:3])Cl	1.09	no
37	CAS:603-36-1	c1ccc([Sb](c2ccccc2)c2ccccc2)cc1	CAS:76-87-9	O[Sn](c1ccccc1)(c1ccccc1)c1ccccc1	[*:1]c1ccccc1.[*:2]c1ccccc1.[*:3]c1ccccc1	[*:1][Sb]([*:2])[*:3]>>[*:1][Sn]([*:2])([*:3])O	1.08	no
38	CAS:102-20-5	O=C(Cc1ccccc1)OCCc1ccccc1	CAS:622-20-8	c1ccc(SCCSc2ccccc2)cc1	[*:1]c1ccccc1.[*:2]c1ccccc1	[*:1]CCOC(=O)C[*:2]>>[*:1]SCCS[*:2]	1.07	no
39	CAS:6197-30-4	CCCCC(CC)COC(=O)C(C#N)=C(c1ccccc1)c1ccccc1	CAS:5232-99-5	CCOC(=O)C(C#N)=C(c1ccccc1)c1ccccc1	[*:1]C(C#N)=C(c1ccccc1)c1ccccc1.[*:2]CC	[*:1]C(=O)OCC([*:2])CCCC>>[*:2]OC([*:1])=O	1.07	no
40	CAS:5232-99-5	CCOC(=O)C(C#N)=C(c1ccccc1)c1ccccc1	CAS:6197-30-4	CCCCC(CC)COC(=O)C(C#N)=C(c1ccccc1)c1ccccc1	[*:1]OC(=O)C(C#N)=C(c1ccccc1)c1ccccc1	[*:1]CC>>[*:1]CC(CC)CCCC	1.07	no
41	CAS:103-29-7	c1ccc(CCc2ccccc2)cc1	CAS:92-59-1	CCN(Cc1ccccc1)c1ccccc1	[*:1]c1ccccc1.[*:2]c1ccccc1	[*:1]CC[*:2]>>[*:1]CN([*:2])CC	1.06	no
42	CAS:1210-39-5	O=CC=C(c1ccccc1)c1ccccc1	CAS:92-59-1	CCN(Cc1ccccc1)c1ccccc1	[*:1]c1ccccc1.[*:2]c1ccccc1	[*:1]C([*:2])=CC=O>>[*:1]CN([*:2])CC	1.02	no
43	CAS:102-20-5	O=C(Cc1ccccc1)OCCc1ccccc1	CAS:139-66-2	c1ccc(Sc2ccccc2)cc1	[*:1]c1ccccc1.[*:2]c1ccccc1	[*:1]CCOC(=O)C[*:2]>>[*:1]S[*:2]	0.99	no
44	CAS:103-29-7	c1ccc(CCc2ccccc2)cc1	CAS:622-20-8	c1ccc(SCCSc2ccccc2)cc1	[*:1]c1ccccc1.[*:2]c1ccccc1	[*:1]CC[*:2]>>[*:1]SCCS[*:2]	0.96	no
45	CAS:495-48-7	[O-][N+](=Nc1ccccc1)c1ccccc1	CAS:882-33-7	c1ccc(SSc2ccccc2)cc1	[*:1]c1ccccc1.[*:2]c1ccccc1	[*:1]N=[N+]([*:2])[O-]>>[*:1]SS[*:2]	0.94	no
46	CAS:1210-39-5	O=CC=C(c1ccccc1)c1ccccc1	CAS:622-20-8	c1ccc(SCCSc2ccccc2)cc1	[*:1]c1ccccc1.[*:2]c1ccccc1	[*:1]C([*:2])=CC=O>>[*:1]SCCS[*:2]	0.92	no
47	CAS:94-47-3	O=C(OCCc1ccccc1)c1ccccc1	CAS:882-33-7	c1ccc(SSc2ccccc2)cc1	[*:1]c1ccccc1.[*:2]c1ccccc1	[*:1]CCOC([*:2])=O>>[*:1]SS[*:2]	0.89	no
48	CAS:103-29-7	c1ccc(CCc2ccccc2)cc1	CAS:139-66-2	c1ccc(Sc2ccccc2)cc1	[*:1]c1ccccc1.[*:2]c1ccccc1	[*:1]CC[*:2]>>[*:1]S[*:2]	0.88	no
49	CAS:645-49-8	C(=C\c1ccccc1)\c1ccccc1	CAS:882-33-7	c1ccc(SSc2ccccc2)cc1	[*:1]c1ccccc1.[*:2]c1ccccc1	[*:1]/C=C\[*:2]>>[*:1]SS[*:2]	0.87	no
50	CAS:92-59-1	CCN(Cc1ccccc1)c1ccccc1	CAS:538-74-9	c1ccc(CSCc2ccccc2)cc1	[*:1]c1ccccc1.[*:2]c1ccccc1	[*:1]CN([*:2])CC>>[*:1]CSC[*:2]	0.87	no
51	CAS:538-74-9	c1ccc(CSCc2ccccc2)cc1	CAS:92-59-1	CCN(Cc1ccccc1)c1ccccc1	[*:2]Cc1ccccc1.[*:1]c1ccccc1	[*:1]CS[*:2]>>[*:1]N([*:2])CC	0.87	no
52	CAS:1210-39-5	O=CC=C(c1ccccc1)c1ccccc1	CAS:139-66-2	c1ccc(Sc2ccccc2)cc1	[*:1]c1ccccc1.[*:2]c1ccccc1	[*:1]C([*:2])=CC=O>>[*:1]S[*:2]	0.85	no
53	CAS:102-16-9	O=C(Cc1ccccc1)OCc1ccccc1	CAS:92-59-1	CCN(Cc1ccccc1)c1ccccc1	[*:2]Cc1ccccc1.[*:1]c1ccccc1	[*:1]CC(=O)O[*:2]>>[*:1]N([*:2])CC	0.83	no
54	CAS:102-16-9	O=C(Cc1ccccc1)OCc1ccccc1	CAS:92-59-1	CCN(Cc1ccccc1)c1ccccc1	[*:2]Cc1ccccc1.[*:1]c1ccccc1	[*:1]COC([*:2])=O>>[*:1]N([*:2])CC	0.83	no
55	CAS:92-59-1	CCN(Cc1ccccc1)c1ccccc1	CAS:102-16-9	O=C(Cc1ccccc1)OCc1ccccc1	[*:1]c1ccccc1.[*:2]c1ccccc1	[*:1]CN([*:2])CC>>[*:1]COC(=O)C[*:2]	0.83	no
56	CAS:103-41-3	O=C(C=Cc1ccccc1)OCc1ccccc1	CAS:92-59-1	CCN(Cc1ccccc1)c1ccccc1	[*:2]Cc1ccccc1.[*:1]c1ccccc1	[*:1]C=CC(=O)O[*:2]>>[*:1]N([*:2])CC	0.83	no
57	CAS:103-41-3	O=C(C=Cc1ccccc1)OCc1ccccc1	CAS:92-59-1	CCN(Cc1ccccc1)c1ccccc1	[*:1]c1ccccc1.[*:2]c1ccccc1	[*:1]C=CC(=O)OC[*:2]>>[*:1]CN([*:2])CC	0.83	no
58	CAS:103-33-3	c1ccc(N=Nc2ccccc2)cc1	CAS:882-33-7	c1ccc(SSc2ccccc2)cc1	[*:1]c1ccccc1.[*:2]c1ccccc1	[*:1]N=N[*:2]>>[*:1]SS[*:2]	0.81	no
59	CAS:603-36-1	c1ccc([Sb](c2ccccc2)c2ccccc2)cc1	CAS:379-52-2	F[Sn](c1ccccc1)(c1ccccc1)c1ccccc1	[*:1]c1ccccc1.[*:2]c1ccccc1.[*:3]c1ccccc1	[*:1][Sb]([*:2])[*:3]>>[*:1][Sn]([*:2])([*:3])F	0.81	no
60	CAS:72-55-9	ClC(Cl)=C(c1ccc(Cl)cc1)c1ccc(Cl)cc1	CAS:3424-82-6	ClC(Cl)=C(c1ccc(Cl)cc1)c1ccccc1Cl	[*:1]C(=C(Cl)Cl)c1ccc(Cl)cc1.[*:2]Cl	[*:1]c1ccc([*:2])cc1>>[*:1]c1ccccc1[*:2]	0.81	no
61	CAS:86-29-3	N#CC(c1ccccc1)c1ccccc1	CAS:882-33-7	c1ccc(SSc2ccccc2)cc1	[*:1]c1ccccc1.[*:2]c1ccccc1	[*:1]C([*:2])C#N>>[*:1]SS[*:2]	0.8	no
62	CAS:778-22-3	CC(C)(c1ccccc1)c1ccccc1	CAS:882-33-7	c1ccc(SSc2ccccc2)cc1	[*:1]c1ccccc1.[*:2]c1ccccc1	[*:1]C([*:2])(C)C>>[*:1]SS[*:2]	0.8	no
63	CAS:451-40-1	O=C(Cc1ccccc1)c1ccccc1	CAS:882-33-7	c1ccc(SSc2ccccc2)cc1	[*:1]c1ccccc1.[*:2]c1ccccc1	[*:1]CC([*:2])=O>>[*:1]SS[*:2]	0.8	no
64	CAS:102-20-5	O=C(Cc1ccccc1)OCCc1ccccc1	CAS:495-48-7	[O-][N+](=Nc1ccccc1)c1ccccc1	[*:1]c1ccccc1.[*:2]c1ccccc1	[*:1]CCOC(=O)C[*:2]>>[*:1]N=[N+]([*:2])[O-]	0.79	no
65	CAS:882-33-7	c1ccc(SSc2ccccc2)cc1	CAS:92-06-8	c1ccc(-c2cccc(-c3ccccc3)c2)cc1	[*:1]c1ccccc1.[*:2]c1ccccc1	[*:1]SS[*:2]>>[*:1]c1cccc([*:2])c1	0.77	no
66	CAS:603-36-1	c1ccc([Sb](c2ccccc2)c2ccccc2)cc1	CAS:900-95-8	CC(=O)O[Sn](c1ccccc1)(c1ccccc1)c1ccccc1	[*:1]c1ccccc1.[*:2]c1ccccc1.[*:3]c1ccccc1	[*:1][Sb]([*:2])[*:3]>>[*:1][Sn]([*:2])([*:3])OC(C)=O	0.77	no
67	CAS:637-03-6	O=[As]c1ccccc1	CAS:100-56-1	Cl[Hg]c1ccccc1	[*:1]c1ccccc1	[*:1][As]=O>>[*:1][Hg]Cl	0.77	no
68	CAS:538-74-9	c1ccc(CSCc2ccccc2)cc1	CAS:622-20-8	c1ccc(SCCSc2ccccc2)cc1	[*:1]c1ccccc1.[*:2]c1ccccc1	[*:1]CSC[*:2]>>[*:1]SCCS[*:2]	0.77	no
69	CAS:102-16-9	O=C(Cc1ccccc1)OCc1ccccc1	CAS:622-20-8	c1ccc(SCCSc2ccccc2)cc1	[*:1]c1ccccc1.[*:2]c1ccccc1	[*:1]COC(=O)C[*:2]>>[*:1]SCCS[*:2]	0.73	no
70	CAS:103-41-3	O=C(C=Cc1ccccc1)OCc1ccccc1	CAS:622-20-8	c1ccc(SCCSc2ccccc2)cc1	[*:1]c1ccccc1.[*:2]c1ccccc1	[*:1]C=CC(=O)OC[*:2]>>[*:1]SCCS[*:2]	0.73	no
71	CAS:94-47-3	O=C(OCCc1ccccc1)c1ccccc1	CAS:102-20-5	O=C(Cc1ccccc1)OCCc1ccccc1	[*:1]c1ccccc1.[*:2]c1ccccc1	[*:1]CCOC([*:2])=O>>[*:1]CCOC(=O)C[*:2]	0.73	no
72	CAS:102-20-5	O=C(Cc1ccccc1)OCCc1ccccc1	CAS:94-47-3	O=C(OCCc1ccccc1)c1ccccc1	[*:2]CCc1ccccc1.[*:1]c1ccccc1	[*:1]CC(=O)O[*:2]>>[*:2]OC([*:1])=O	0.73	no
73	CAS:104-66-5	c1ccc(OCCOc2ccccc2)cc1	CAS:882-33-7	c1ccc(SSc2ccccc2)cc1	[*:1]c1ccccc1.[*:2]c1ccccc1	[*:1]OCCO[*:2]>>[*:1]SS[*:2]	0.73	no
74	CAS:1162-06-7	CC(=O)O[Pb](c1ccccc1)(c1ccccc1)c1ccccc1	CAS:603-36-1	c1ccc([Sb](c2ccccc2)c2ccccc2)cc1	[*:1]c1ccccc1.[*:2]c1ccccc1.[*:3]c1ccccc1	[*:1][Pb]([*:2])([*:3])OC(C)=O>>[*:1][Sb]([*:2])[*:3]	0.72	no
75	CAS:645-49-8	C(=C\c1ccccc1)\c1ccccc1	CAS:102-20-5	O=C(Cc1ccccc1)OCCc1ccccc1	[*:1]c1ccccc1.[*:2]c1ccccc1	[*:1]/C=C\[*:2]>>[*:1]CCOC(=O)C[*:2]	0.72	no
76	CAS:92-59-1	CCN(Cc1ccccc1)c1ccccc1	CAS:102-09-0	O=C(Oc1ccccc1)Oc1ccccc1	[*:1]c1ccccc1.[*:2]c1ccccc1	[*:1]CN([*:2])CC>>[*:1]OC(=O)O[*:2]	0.72	no
77	CAS:2052-07-5	Brc1ccccc1-c1ccccc1	CAS:90-41-5	Nc1ccccc1-c1ccccc1	[*:1]c1ccccc1-c1ccccc1	[*:1]Br>>[*:1]N	0.71	no
78	CAS:538-74-9	c1ccc(CSCc2ccccc2)cc1	CAS:139-66-2	c1ccc(Sc2ccccc2)cc1	[*:1]c1ccccc1.[*:2]c1ccccc1	[*:1]CSC[*:2]>>[*:1]S[*:2]	0.69	no
79	CAS:882-33-7	c1ccc(SSc2ccccc2)cc1	CAS:84-15-1	c1ccc(-c2ccccc2-c2ccccc2)cc1	[*:1]c1ccccc1.[*:2]c1ccccc1	[*:1]SS[*:2]>>[*:1]c1ccccc1[*:2]	0.68	no
80	CAS:103-29-7	c1ccc(CCc2ccccc2)cc1	CAS:495-48-7	[O-][N+](=Nc1ccccc1)c1ccccc1	[*:1]c1ccccc1.[*:2]c1ccccc1	[*:1]CC[*:2]>>[*:1]N=[N+]([*:2])[O-]	0.68	no
81	CAS:102-16-9	O=C(Cc1ccccc1)OCc1ccccc1	CAS:139-66-2	c1ccc(Sc2ccccc2)cc1	[*:1]c1ccccc1.[*:2]c1ccccc1	[*:1]COC(=O)C[*:2]>>[*:1]S[*:2]	0.66	no
82	CAS:103-41-3	O=C(C=Cc1ccccc1)OCc1ccccc1	CAS:139-66-2	c1ccc(Sc2ccccc2)cc1	[*:1]c1ccccc1.[*:2]c1ccccc1	[*:1]C=CC(=O)OC[*:2]>>[*:1]S[*:2]	0.65	no
83	CAS:102-20-5	O=C(Cc1ccccc1)OCCc1ccccc1	CAS:103-33-3	c1ccc(N=Nc2ccccc2)cc1	[*:1]c1ccccc1.[*:2]c1ccccc1	[*:1]CCOC(=O)C[*:2]>>[*:1]N=N[*:2]	0.65	no
84	CAS:87-02-5	Nc1ccc2c(O)cc(S(=O)(=O)O)cc2c1	CAS:119-40-4	O=S(=O)(O)c1cc(O)c2ccc(Nc3ccccc3)cc2c1	[*:1]c1ccc2c(O)cc(S(=O)(=O)O)cc2c1	[*:1]N>>[*:1]Nc1ccccc1	0.65	no
85	CAS:119-40-4	O=S(=O)(O)c1cc(O)c2ccc(Nc3ccccc3)cc2c1	CAS:87-02-5	Nc1ccc2c(O)cc(S(=O)(=O)O)cc2c1	[*:1]Nc1ccc2c(O)cc(S(=O)(=O)O)cc2c1	[*:1]c1ccccc1>>[*:1][H]	0.65	no
86	CAS:86-29-3	N#CC(c1ccccc1)c1ccccc1	CAS:102-20-5	O=C(Cc1ccccc1)OCCc1ccccc1	[*:1]c1ccccc1.[*:2]c1ccccc1	[*:1]C([*:2])C#N>>[*:1]CCOC(=O)C[*:2]	0.65	no
87	CAS:778-22-3	CC(C)(c1ccccc1)c1ccccc1	CAS:102-20-5	O=C(Cc1ccccc1)OCCc1ccccc1	[*:1]c1ccccc1.[*:2]c1ccccc1	[*:1]C([*:2])(C)C>>[*:1]CCOC(=O)C[*:2]	0.65	no
88	CAS:92-59-1	CCN(Cc1ccccc1)c1ccccc1	CAS:84-15-1	c1ccc(-c2ccccc2-c2ccccc2)cc1	[*:1]c1ccccc1.[*:2]c1ccccc1	[*:1]CN([*:2])CC>>[*:1]c1ccccc1[*:2]	0.64	no
89	CAS:2052-07-5	Brc1ccccc1-c1ccccc1	CAS:84-15-1	c1ccc(-c2ccccc2-c2ccccc2)cc1	[*:1]c1ccccc1-c1ccccc1	[*:1]Br>>[*:1]c1ccccc1	0.64	no
90	CAS:451-40-1	O=C(Cc1ccccc1)c1ccccc1	CAS:102-20-5	O=C(Cc1ccccc1)OCCc1ccccc1	[*:2]Cc1ccccc1.[*:1]c1ccccc1	[*:1]C([*:2])=O>>[*:1]CCOC([*:2])=O	0.64	no
91	CAS:451-40-1	O=C(Cc1ccccc1)c1ccccc1	CAS:102-20-5	O=C(Cc1ccccc1)OCCc1ccccc1	[*:1]c1ccccc1.[*:2]c1ccccc1	[*:1]CC([*:2])=O>>[*:1]CCOC(=O)C[*:2]	0.64	no
92	CAS:1210-39-5	O=CC=C(c1ccccc1)c1ccccc1	CAS:495-48-7	[O-][N+](=Nc1ccccc1)c1ccccc1	[*:1]c1ccccc1.[*:2]c1ccccc1	[*:1]C([*:2])=CC=O>>[*:1]N=[N+]([*:2])[O-]	0.64	no
93	CAS:103-29-7	c1ccc(CCc2ccccc2)cc1	CAS:94-47-3	O=C(OCCc1ccccc1)c1ccccc1	[*:1]c1ccccc1.[*:2]c1ccccc1	[*:1]CC[*:2]>>[*:1]CCOC([*:2])=O	0.62	no
94	CAS:2052-07-5	Brc1ccccc1-c1ccccc1	CAS:86-00-0	O=[N+]([O-])c1ccccc1-c1ccccc1	[*:1]c1ccccc1-c1ccccc1	[*:1]Br>>[*:1][N+](=O)[O-]	0.62	no
95	CAS:102-09-0	O=C(Oc1ccccc1)Oc1ccccc1	CAS:622-20-8	c1ccc(SCCSc2ccccc2)cc1	[*:1]c1ccccc1.[*:2]c1ccccc1	[*:1]OC(=O)O[*:2]>>[*:1]SCCS[*:2]	0.62	no
96	CAS:102-20-5	O=C(Cc1ccccc1)OCCc1ccccc1	CAS:92-06-8	c1ccc(-c2cccc(-c3ccccc3)c2)cc1	[*:1]c1ccccc1.[*:2]c1ccccc1	[*:1]CCOC(=O)C[*:2]>>[*:1]c1cccc([*:2])c1	0.62	no
97	CAS:645-49-8	C(=C\c1ccccc1)\c1ccccc1	CAS:103-29-7	c1ccc(CCc2ccccc2)cc1	[*:1]c1ccccc1.[*:2]c1ccccc1	[*:1]/C=C\[*:2]>>[*:1]CC[*:2]	0.61	no
98	CAS:102-09-0	O=C(Oc1ccccc1)Oc1ccccc1	CAS:882-33-7	c1ccc(SSc2ccccc2)cc1	[*:1]c1ccccc1.[*:2]c1ccccc1	[*:1]OC(=O)O[*:2]>>[*:1]SS[*:2]	0.61	no
99	CAS:58-27-5	CC1=CC(=O)c2ccccc2C1=O	CAS:130-15-4	O=C1C=CC(=O)c2ccccc21	[*:1]C1=CC(=O)c2ccccc2C1=O	[*:1]C>>[*:1][H]	0.6	no
100	CAS:92-59-1	CCN(Cc1ccccc1)c1ccccc1	CAS:104-66-5	c1ccc(OCCOc2ccccc2)cc1	[*:1]c1ccccc1.[*:2]c1ccccc1	[*:1]CN([*:2])CC>>[*:1]OCCO[*:2]	0.6	no
101	CAS:1210-39-5	O=CC=C(c1ccccc1)c1ccccc1	CAS:94-47-3	O=C(OCCc1ccccc1)c1ccccc1	[*:1]c1ccccc1.[*:2]c1ccccc1	[*:1]C([*:2])=CC=O>>[*:1]CCOC([*:2])=O	0.58	no
102	CAS:645-49-8	C(=C\c1ccccc1)\c1ccccc1	CAS:1210-39-5	O=CC=C(c1ccccc1)c1ccccc1	[*:1]c1ccccc1.[*:2]c1ccccc1	[*:1]/C=C\[*:2]>>[*:1]C([*:2])=CC=O	0.57	no
103	CAS:102-20-5	O=C(Cc1ccccc1)OCCc1ccccc1	CAS:104-66-5	c1ccc(OCCOc2ccccc2)cc1	[*:1]c1ccccc1.[*:2]c1ccccc1	[*:1]CCOC(=O)C[*:2]>>[*:1]OCCO[*:2]	0.57	no
104	CAS:58-72-0	C(=C(c1ccccc1)c1ccccc1)c1ccccc1	CAS:639-58-7	Cl[Sn](c1ccccc1)(c1ccccc1)c1ccccc1	[*:1]c1ccccc1.[*:2]c1ccccc1.[*:3]c1ccccc1	[*:1]C=C([*:2])[*:3]>>[*:1][Sn]([*:2])([*:3])Cl	0.57	no
105	CAS:58-72-0	C(=C(c1ccccc1)c1ccccc1)c1ccccc1	CAS:76-87-9	O[Sn](c1ccccc1)(c1ccccc1)c1ccccc1	[*:1]c1ccccc1.[*:2]c1ccccc1.[*:3]c1ccccc1	[*:1]C=C([*:2])[*:3]>>[*:1][Sn]([*:2])([*:3])O	0.56	no
106	CAS:92-59-1	CCN(Cc1ccccc1)c1ccccc1	CAS:92-06-8	c1ccc(-c2cccc(-c3ccccc3)c2)cc1	[*:1]c1ccccc1.[*:2]c1ccccc1	[*:1]CN([*:2])CC>>[*:1]c1cccc([*:2])c1	0.55	no
107	CAS:103-29-7	c1ccc(CCc2ccccc2)cc1	CAS:103-33-3	c1ccc(N=Nc2ccccc2)cc1	[*:1]c1ccccc1.[*:2]c1ccccc1	[*:1]CC[*:2]>>[*:1]N=N[*:2]	0.55	no
108	CAS:622-20-8	c1ccc(SCCSc2ccccc2)cc1	CAS:84-15-1	c1ccc(-c2ccccc2-c2ccccc2)cc1	[*:1]c1ccccc1.[*:2]c1ccccc1	[*:1]SCCS[*:2]>>[*:1]c1ccccc1[*:2]	0.54	no
109	CAS:102-09-0	O=C(Oc1ccccc1)Oc1ccccc1	CAS:139-66-2	c1ccc(Sc2ccccc2)cc1	[*:1]c1ccccc1.[*:2]c1ccccc1	[*:1]OC(=O)O[*:2]>>[*:1]S[*:2]	0.54	no
110	CAS:86-29-3	N#CC(c1ccccc1)c1ccccc1	CAS:103-29-7	c1ccc(CCc2ccccc2)cc1	[*:1]c1ccccc1.[*:2]c1ccccc1	[*:1]C([*:2])C#N>>[*:1]CC[*:2]	0.54	no
111	CAS:778-22-3	CC(C)(c1ccccc1)c1ccccc1	CAS:103-29-7	c1ccc(CCc2ccccc2)cc1	[*:1]c1ccccc1.[*:2]c1ccccc1	[*:1]C([*:2])(C)C>>[*:1]CC[*:2]	0.54	no
112	CAS:451-40-1	O=C(Cc1ccccc1)c1ccccc1	CAS:103-29-7	c1ccc(CCc2ccccc2)cc1	[*:1]c1ccccc1.[*:2]c1ccccc1	[*:1]CC([*:2])=O>>[*:1]CC[*:2]	0.53	no
113	CAS:2052-07-5	Brc1ccccc1-c1ccccc1	CAS:321-60-8	Fc1ccccc1-c1ccccc1	[*:1]c1ccccc1-c1ccccc1	[*:1]Br>>[*:1]F	0.53	no
114	CAS:70-10-0	O=c1[nH]sc2cc(Cl)ccc12	CAS:2634-33-5	O=c1[nH]sc2ccccc12	[*:1]c1ccc2c(=O)[nH]sc2c1	[*:1]Cl>>[*:1][H]	0.53	no
115	CAS:451-40-1	O=C(Cc1ccccc1)c1ccccc1	CAS:92-59-1	CCN(Cc1ccccc1)c1ccccc1	[*:1]Cc1ccccc1.[*:2]c1ccccc1	[*:1]C([*:2])=O>>[*:1]N([*:2])CC	0.53	no
116	CAS:451-40-1	O=C(Cc1ccccc1)c1ccccc1	CAS:92-59-1	CCN(Cc1ccccc1)c1ccccc1	[*:1]c1ccccc1.[*:2]c1ccccc1	[*:1]CC([*:2])=O>>[*:1]CN([*:2])CC	0.53	no
117	CAS:102-20-5	O=C(Cc1ccccc1)OCCc1ccccc1	CAS:84-15-1	c1ccc(-c2ccccc2-c2ccccc2)cc1	[*:1]c1ccccc1.[*:2]c1ccccc1	[*:1]CCOC(=O)C[*:2]>>[*:1]c1ccccc1[*:2]	0.53	no
118	CAS:778-22-3	CC(C)(c1ccccc1)c1ccccc1	CAS:92-59-1	CCN(Cc1ccccc1)c1ccccc1	[*:1]c1ccccc1.[*:2]c1ccccc1	[*:1]C([*:2])(C)C>>[*:1]CN([*:2])CC	0.52	no
119	CAS:86-29-3	N#CC(c1ccccc1)c1ccccc1	CAS:92-59-1	CCN(Cc1ccccc1)c1ccccc1	[*:1]c1ccccc1.[*:2]c1ccccc1	[*:1]C([*:2])C#N>>[*:1]CN([*:2])CC	0.52	no
120	CAS:58-72-0	C(=C(c1ccccc1)c1ccccc1)c1ccccc1	CAS:603-36-1	c1ccc([Sb](c2ccccc2)c2ccccc2)cc1	[*:1]c1ccccc1.[*:2]c1ccccc1.[*:3]c1ccccc1	[*:1]C=C([*:2])[*:3]>>[*:1][Sb]([*:2])[*:3]	0.52	no
121	CAS:24817-51-4	CCC(C)C(=O)OCCc1ccccc1	CAS:103-52-6	CCCC(=O)OCCc1ccccc1	[*:1]C(CC)C(=O)OCCc1ccccc1	[*:1]C>>[*:1][H]	0.52	no
122	CAS:24817-51-4	CCC(C)C(=O)OCCc1ccccc1	CAS:103-52-6	CCCC(=O)OCCc1ccccc1	[*:1]C(=O)OCCc1ccccc1	[*:1]C(C)CC>>[*:1]CCC	0.52	no
123	CAS:92-59-1	CCN(Cc1ccccc1)c1ccccc1	CAS:103-33-3	c1ccc(N=Nc2ccccc2)cc1	[*:1]c1ccccc1.[*:2]c1ccccc1	[*:1]CN([*:2])CC>>[*:1]N=N[*:2]	0.52	no
124	CAS:103-29-7	c1ccc(CCc2ccccc2)cc1	CAS:92-06-8	c1ccc(-c2cccc(-c3ccccc3)c2)cc1	[*:1]c1ccccc1.[*:2]c1ccccc1	[*:1]CC[*:2]>>[*:1]c1cccc([*:2])c1	0.51	no
125	CAS:1210-39-5	O=CC=C(c1ccccc1)c1ccccc1	CAS:103-33-3	c1ccc(N=Nc2ccccc2)cc1	[*:1]c1ccccc1.[*:2]c1ccccc1	[*:1]C([*:2])=CC=O>>[*:1]N=N[*:2]	0.51	no
126	CAS:1210-39-5	O=CC=C(c1ccccc1)c1ccccc1	CAS:86-29-3	N#CC(c1ccccc1)c1ccccc1	[*:1]c1ccccc1.[*:2]c1ccccc1	[*:1]C([*:2])=CC=O>>[*:1]C([*:2])C#N	0.5	no
127	CAS:778-22-3	CC(C)(c1ccccc1)c1ccccc1	CAS:1210-39-5	O=CC=C(c1ccccc1)c1ccccc1	[*:1]c1ccccc1.[*:2]c1ccccc1	[*:1]C([*:2])(C)C>>[*:1]C([*:2])=CC=O	0.5	no
128	CAS:90-51-7	Nc1ccc2cc(S(=O)(=O)O)cc(O)c2c1	CAS:93-00-5	Nc1ccc2cc(S(=O)(=O)O)ccc2c1	[*:1]c1cc(S(=O)(=O)O)cc2ccc(N)cc12	[*:1]O>>[*:1][H]	0.5	no
129	CAS:1210-39-5	O=CC=C(c1ccccc1)c1ccccc1	CAS:451-40-1	O=C(Cc1ccccc1)c1ccccc1	[*:1]c1ccccc1.[*:2]c1ccccc1	[*:1]C([*:2])=CC=O>>[*:1]CC([*:2])=O	0.5	no
130	CAS:104-66-5	c1ccc(OCCOc2ccccc2)cc1	CAS:622-20-8	c1ccc(SCCSc2ccccc2)cc1	[*:1]c1ccccc1.[*:2]c1ccccc1	[*:1]OCCO[*:2]>>[*:1]SCCS[*:2]	0.49	no
131	CAS:103-41-3	O=C(C=Cc1ccccc1)OCc1ccccc1	CAS:882-33-7	c1ccc(SSc2ccccc2)cc1	[*:1]c1ccccc1.[*:2]c1ccccc1	[*:1]C=CC(=O)OC[*:2]>>[*:1]SS[*:2]	0.49	no
132	CAS:102-16-9	O=C(Cc1ccccc1)OCc1ccccc1	CAS:882-33-7	c1ccc(SSc2ccccc2)cc1	[*:1]c1ccccc1.[*:2]c1ccccc1	[*:1]COC(=O)C[*:2]>>[*:1]SS[*:2]	0.49	no
133	CAS:538-74-9	c1ccc(CSCc2ccccc2)cc1	CAS:495-48-7	[O-][N+](=Nc1ccccc1)c1ccccc1	[*:1]c1ccccc1.[*:2]c1ccccc1	[*:1]CSC[*:2]>>[*:1]N=[N+]([*:2])[O-]	0.49	no
134	CAS:1210-39-5	O=CC=C(c1ccccc1)c1ccccc1	CAS:92-06-8	c1ccc(-c2cccc(-c3ccccc3)c2)cc1	[*:1]c1ccccc1.[*:2]c1ccccc1	[*:1]C([*:2])=CC=O>>[*:1]c1cccc([*:2])c1	0.47	no
135	CAS:92-66-0	Brc1ccc(-c2ccccc2)cc1	CAS:644-08-6	Cc1ccc(-c2ccccc2)cc1	[*:1]c1ccc(-c2ccccc2)cc1	[*:1]Br>>[*:1]C	0.47	no
136	CAS:103-29-7	c1ccc(CCc2ccccc2)cc1	CAS:104-66-5	c1ccc(OCCOc2ccccc2)cc1	[*:1]c1ccccc1.[*:2]c1ccccc1	[*:1]CC[*:2]>>[*:1]OCCO[*:2]	0.46	no
137	CAS:139-66-2	c1ccc(Sc2ccccc2)cc1	CAS:84-15-1	c1ccc(-c2ccccc2-c2ccccc2)cc1	[*:1]c1ccccc1.[*:2]c1ccccc1	[*:1]S[*:2]>>[*:1]c1ccccc1[*:2]	0.46	no
138	CAS:15972-60-8	CCc1cccc(CC)c1N(COC)C(=O)CCl	CAS:23184-66-9	CCCCOCN(C(=O)CCl)c1c(CC)cccc1CC	[*:1]N(C(=O)CCl)c1c(CC)cccc1CC	[*:1]COC>>[*:1]COCCCC	0.46	no
139	CAS:15972-60-8	CCc1cccc(CC)c1N(COC)C(=O)CCl	CAS:23184-66-9	CCCCOCN(C(=O)CCl)c1c(CC)cccc1CC	[*:1]OCN(C(=O)CCl)c1c(CC)cccc1CC	[*:1]C>>[*:1]CCCC	0.46	no
140	CAS:15972-60-8	CCc1cccc(CC)c1N(COC)C(=O)CCl	CAS:23184-66-9	CCCCOCN(C(=O)CCl)c1c(CC)cccc1CC	[*:1]CN(C(=O)CCl)c1c(CC)cccc1CC	[*:1]OC>>[*:1]OCCCC	0.46	no
141	CAS:538-74-9	c1ccc(CSCc2ccccc2)cc1	CAS:882-33-7	c1ccc(SSc2ccccc2)cc1	[*:1]c1ccccc1.[*:2]c1ccccc1	[*:1]CSC[*:2]>>[*:1]SS[*:2]	0.46	no
142	CAS:622-20-8	c1ccc(SCCSc2ccccc2)cc1	CAS:92-06-8	c1ccc(-c2cccc(-c3ccccc3)c2)cc1	[*:1]c1ccccc1.[*:2]c1ccccc1	[*:1]SCCS[*:2]>>[*:1]c1cccc([*:2])c1	0.45	no
143	CAS:102-20-5	O=C(Cc1ccccc1)OCCc1ccccc1	CAS:102-09-0	O=C(Oc1ccccc1)Oc1ccccc1	[*:1]c1ccccc1.[*:2]c1ccccc1	[*:1]CCOC(=O)C[*:2]>>[*:1]OC(=O)O[*:2]	0.45	no
144	CAS:102-16-9	O=C(Cc1ccccc1)OCc1ccccc1	CAS:495-48-7	[O-][N+](=Nc1ccccc1)c1ccccc1	[*:1]c1ccccc1.[*:2]c1ccccc1	[*:1]COC(=O)C[*:2]>>[*:1]N=[N+]([*:2])[O-]	0.45	no
145	CAS:645-49-8	C(=C\c1ccccc1)\c1ccccc1	CAS:92-59-1	CCN(Cc1ccccc1)c1ccccc1	[*:1]c1ccccc1.[*:2]c1ccccc1	[*:1]/C=C\[*:2]>>[*:1]CN([*:2])CC	0.45	no
146	CAS:103-41-3	O=C(C=Cc1ccccc1)OCc1ccccc1	CAS:495-48-7	[O-][N+](=Nc1ccccc1)c1ccccc1	[*:1]c1ccccc1.[*:2]c1ccccc1	[*:1]C=CC(=O)OC[*:2]>>[*:1]N=[N+]([*:2])[O-]	0.45	no
147	CAS:28434-00-6	C=CCC1=C(C)[CH](OC(=O)[CH]2[CH](C=C(C)C)C2(C)C)CC1=O	CAS:584-79-2	C=CCC1=C(C)C(OC(=O)C2C(C=C(C)C)C2(C)C)CC1=O	[*:1]C.[*:2]C.[*:3]C(=O)OC1CC(=O)C(CC=C)=C1C	[*:1]C([*:2])=CC1C([*:3])C1(C)C>>[*:1]C(C)=CC1C([*:3])C1([*:2])C	0.45	no
148	CAS:28434-00-6	C=CCC1=C(C)[CH](OC(=O)[CH]2[CH](C=C(C)C)C2(C)C)CC1=O	CAS:584-79-2	C=CCC1=C(C)C(OC(=O)C2C(C=C(C)C)C2(C)C)CC1=O	[*:1]C.[*:2]C.[*:3]C(=O)OC1CC(=O)C(CC=C)=C1C	[*:1]C([*:2])=CC1C([*:3])C1(C)C>>[*:3]C1C(C=C(C)C)C1([*:1])[*:2]	0.45	no
149	CAS:28434-00-6	C=CCC1=C(C)[CH](OC(=O)[CH]2[CH](C=C(C)C)C2(C)C)CC1=O	CAS:584-79-2	C=CCC1=C(C)C(OC(=O)C2C(C=C(C)C)C2(C)C)CC1=O	[*:1]C.[*:2]C.[*:3]C(=O)OC1CC(=O)C(CC=C)=C1C	[*:1]C([*:2])=CC1C([*:3])C1(C)C>>[*:1]C(C)=CC1C([*:3])[C@@]1([*:2])C	0.45	no
150	CAS:28434-00-6	C=CCC1=C(C)[CH](OC(=O)[CH]2[CH](C=C(C)C)C2(C)C)CC1=O	CAS:584-79-2	C=CCC1=C(C)C(OC(=O)C2C(C=C(C)C)C2(C)C)CC1=O	[*:1]C.[*:2]C.[*:3]C(=O)OC1CC(=O)C(CC=C)=C1C	[*:1]C([*:2])=CC1C([*:3])C1(C)C>>[*:1]C(C)=CC1C([*:3])[C@]1([*:2])C	0.45	no
151	CAS:584-79-2	C=CCC1=C(C)C(OC(=O)C2C(C=C(C)C)C2(C)C)CC1=O	CAS:28434-00-6	C=CCC1=C(C)[CH](OC(=O)[CH]2[CH](C=C(C)C)C2(C)C)CC1=O	[*:1]C.[*:3]C.[*:2]C(=O)OC1CC(=O)C(CC=C)=C1C	[*:1]C(C)=CC1C([*:2])C1([*:3])C>>[*:1]C(C)=CC1C([*:2])[C@]1([*:3])C	0.45	no
152	CAS:584-79-2	C=CCC1=C(C)C(OC(=O)C2C(C=C(C)C)C2(C)C)CC1=O	CAS:28434-00-6	C=CCC1=C(C)[CH](OC(=O)[CH]2[CH](C=C(C)C)C2(C)C)CC1=O	[*:1]C.[*:3]C.[*:2]C(=O)OC1CC(=O)C(CC=C)=C1C	[*:1]C(C)=CC1C([*:2])C1([*:3])C>>[*:2]C1C(C=C(C)C)C1([*:1])[*:3]	0.45	no
153	CAS:584-79-2	C=CCC1=C(C)C(OC(=O)C2C(C=C(C)C)C2(C)C)CC1=O	CAS:28434-00-6	C=CCC1=C(C)[CH](OC(=O)[CH]2[CH](C=C(C)C)C2(C)C)CC1=O	[*:3]C.[*:1]C1CC(=O)C(CC=C)=C1C.[*:2]C=C(C)C	[*:1]OC(=O)C1C([*:2])C1([*:3])C>>[*:1]OC(=O)C1C([*:2])[C@]1([*:3])C	0.45	no
154	CAS:584-79-2	C=CCC1=C(C)C(OC(=O)C2C(C=C(C)C)C2(C)C)CC1=O	CAS:28434-00-6	C=CCC1=C(C)[CH](OC(=O)[CH]2[CH](C=C(C)C)C2(C)C)CC1=O	[*:3]C.[*:1]C1CC(=O)C(CC=C)=C1C.[*:2]C=C(C)C	[*:1]OC(=O)C1C([*:2])C1([*:3])C>>[*:1]OC(=O)C1C([*:2])[C@@]1([*:3])C	0.45	no
155	CAS:28434-00-6	C=CCC1=C(C)[CH](OC(=O)[CH]2[CH](C=C(C)C)C2(C)C)CC1=O	CAS:584-79-2	C=CCC1=C(C)C(OC(=O)C2C(C=C(C)C)C2(C)C)CC1=O	[*:1]C.[*:3]C.[*:2]C(=O)OC1CC(=O)C(CC=C)=C1C	[*:1]C(C)=CC1C([*:2])[C@]1([*:3])C>>[*:2]C1C(C=C(C)C)C1([*:1])[*:3]	0.45	no
156	CAS:584-79-2	C=CCC1=C(C)C(OC(=O)C2C(C=C(C)C)C2(C)C)CC1=O	CAS:28434-00-6	C=CCC1=C(C)[CH](OC(=O)[CH]2[CH](C=C(C)C)C2(C)C)CC1=O	[*:1]C.[*:3]C.[*:2]C(=O)OC1CC(=O)C(CC=C)=C1C	[*:1]C(C)=CC1C([*:2])[C@@]1([*:3])C>>[*:2]C1C(C=C(C)C)C1([*:1])[*:3]	0.45	no
157	CAS:584-79-2	C=CCC1=C(C)C(OC(=O)C2C(C=C(C)C)C2(C)C)CC1=O	CAS:28434-00-6	C=CCC1=C(C)[CH](OC(=O)[CH]2[CH](C=C(C)C)C2(C)C)CC1=O	[*:1]C.[*:3]C.[*:2]C(=O)OC1CC(=O)C(CC=C)=C1C	[*:1]C(C)=CC1C([*:2])C1([*:3])C>>[*:1]C(C)=CC1C([*:2])[C@@]1([*:3])C	0.45	no
158	CAS:94-47-3	O=C(OCCc1ccccc1)c1ccccc1	CAS:92-59-1	CCN(Cc1ccccc1)c1ccccc1	[*:1]c1ccccc1.[*:2]c1ccccc1	[*:1]CCOC([*:2])=O>>[*:1]CN([*:2])CC	0.44	no
159	CAS:72-55-9	ClC(Cl)=C(c1ccc(Cl)cc1)c1ccc(Cl)cc1	CAS:90-98-2	O=C(c1ccc(Cl)cc1)c1ccc(Cl)cc1	[*:1]c1ccc(Cl)cc1.[*:2]c1ccc(Cl)cc1	[*:1]C([*:2])=C(Cl)Cl>>[*:1]C([*:2])=O	0.44	no
160	CAS:5153-67-3	O=[N+]([O-])/C=C/c1ccccc1	CAS:705-60-2	CC(=Cc1ccccc1)[N+](=O)[O-]	[*:2][N+](=O)[O-].[*:1]c1ccccc1	[*:1]/C=C\[*:2]>>[*:1]C=C([*:2])C	0.43	no
161	CAS:103-53-7	O=C(C=Cc1ccccc1)OCCc1ccccc1	CAS:102-20-5	O=C(Cc1ccccc1)OCCc1ccccc1	[*:2]CCc1ccccc1.[*:1]c1ccccc1	[*:1]C=CC(=O)O[*:2]>>[*:1]CC(=O)O[*:2]	0.43	no
162	CAS:102-20-5	O=C(Cc1ccccc1)OCCc1ccccc1	CAS:103-53-7	O=C(C=Cc1ccccc1)OCCc1ccccc1	[*:1]C(=O)OCCc1ccccc1.[*:2]c1ccccc1	[*:1]C[*:2]>>[*:1]C=C[*:2]	0.43	no
163	CAS:94-47-3	O=C(OCCc1ccccc1)c1ccccc1	CAS:538-74-9	c1ccc(CSCc2ccccc2)cc1	[*:1]c1ccccc1.[*:2]c1ccccc1	[*:1]CCOC([*:2])=O>>[*:1]CSC[*:2]	0.43	no
164	CAS:5307-14-2	Nc1ccc(N)c([N+](=O)[O-])c1	CAS:54029-45-7	N#CSc1ccc(N)c([N+](=O)[O-])c1	[*:1]c1ccc(N)c([N+](=O)[O-])c1	[*:1]N>>[*:1]SC#N	0.43	no
165	CAS:1210-39-5	O=CC=C(c1ccccc1)c1ccccc1	CAS:104-66-5	c1ccc(OCCOc2ccccc2)cc1	[*:1]c1ccccc1.[*:2]c1ccccc1	[*:1]C([*:2])=CC=O>>[*:1]OCCO[*:2]	0.43	no
166	CAS:451-40-1	O=C(Cc1ccccc1)c1ccccc1	CAS:622-20-8	c1ccc(SCCSc2ccccc2)cc1	[*:1]c1ccccc1.[*:2]c1ccccc1	[*:1]CC([*:2])=O>>[*:1]SCCS[*:2]	0.43	no
167	CAS:58769-20-3	CC1(C)[CH](/C=C2\CCSC2=O)[CH]1C(=O)OCc1coc(Cc2ccccc2)c1	CAS:10453-86-8	CC(C)=CC1C(C(=O)OCc2coc(Cc3ccccc3)c2)C1(C)C	[*:1]C1C(C(=O)OCc2coc(Cc3ccccc3)c2)C1(C)C	[*:1]/C=C1/CCSC1=O>>[*:1]C=C(C)C	0.43	no
168	CAS:5307-14-2	Nc1ccc(N)c([N+](=O)[O-])c1	CAS:2871-01-4	Nc1ccc(NCCO)c([N+](=O)[O-])c1	[*:1]c1ccc(N)cc1[N+](=O)[O-]	[*:1]N>>[*:1]NCCO	0.42	no
169	CAS:2871-01-4	Nc1ccc(NCCO)c([N+](=O)[O-])c1	CAS:5307-14-2	Nc1ccc(N)c([N+](=O)[O-])c1	[*:1]Nc1ccc(N)cc1[N+](=O)[O-]	[*:1]CCO>>[*:1][H]	0.42	no
170	CAS:778-22-3	CC(C)(c1ccccc1)c1ccccc1	CAS:622-20-8	c1ccc(SCCSc2ccccc2)cc1	[*:1]c1ccccc1.[*:2]c1ccccc1	[*:1]C([*:2])(C)C>>[*:1]SCCS[*:2]	0.42	no
171	CAS:86-29-3	N#CC(c1ccccc1)c1ccccc1	CAS:622-20-8	c1ccc(SCCSc2ccccc2)cc1	[*:1]c1ccccc1.[*:2]c1ccccc1	[*:1]C([*:2])C#N>>[*:1]SCCS[*:2]	0.42	no
172	CAS:103-29-7	c1ccc(CCc2ccccc2)cc1	CAS:84-15-1	c1ccc(-c2ccccc2-c2ccccc2)cc1	[*:1]c1ccccc1.[*:2]c1ccccc1	[*:1]CC[*:2]>>[*:1]c1ccccc1[*:2]	0.42	no
173	CAS:645-49-8	C(=C\c1ccccc1)\c1ccccc1	CAS:538-74-9	c1ccc(CSCc2ccccc2)cc1	[*:1]c1ccccc1.[*:2]c1ccccc1	[*:1]/C=C\[*:2]>>[*:1]CSC[*:2]	0.42	no
174	CAS:104-66-5	c1ccc(OCCOc2ccccc2)cc1	CAS:139-66-2	c1ccc(Sc2ccccc2)cc1	[*:1]c1ccccc1.[*:2]c1ccccc1	[*:1]OCCO[*:2]>>[*:1]S[*:2]	0.42	no
175	CAS:103-33-3	c1ccc(N=Nc2ccccc2)cc1	CAS:622-20-8	c1ccc(SCCSc2ccccc2)cc1	[*:1]c1ccccc1.[*:2]c1ccccc1	[*:1]N=N[*:2]>>[*:1]SCCS[*:2]	0.41	no
176	CAS:134-84-9	Cc1ccc(C(=O)c2ccccc2)cc1	CAS:134-85-0	O=C(c1ccccc1)c1ccc(Cl)cc1	[*:1]c1ccc(C(=O)c2ccccc2)cc1	[*:1]C>>[*:1]Cl	0.4	no
177	CAS:122-67-8	CC(C)COC(=O)C=Cc1ccccc1	CAS:7779-65-9	CC(C)CCOC(=O)C=Cc1ccccc1	[*:2]C.[*:1]OC(=O)C=Cc1ccccc1	[*:1]CC([*:2])C>>[*:1]CC[C@@H]([*:2])C	0.4	no
178	CAS:122-67-8	CC(C)COC(=O)C=Cc1ccccc1	CAS:7779-65-9	CC(C)CCOC(=O)C=Cc1ccccc1	[*:1]C(C)C.[*:2]OC(=O)C=Cc1ccccc1	[*:1]C[*:2]>>[*:1]CC[*:2]	0.4	no
179	CAS:7779-65-9	CC(C)CCOC(=O)C=Cc1ccccc1	CAS:122-67-8	CC(C)COC(=O)C=Cc1ccccc1	[*:1]C(C)C.[*:2]C=Cc1ccccc1	[*:1]CCOC([*:2])=O>>[*:1]COC([*:2])=O	0.4	no
180	CAS:122-67-8	CC(C)COC(=O)C=Cc1ccccc1	CAS:7779-65-9	CC(C)CCOC(=O)C=Cc1ccccc1	[*:1]OC(=O)C=Cc1ccccc1	[*:1]CC(C)C>>[*:1]CCC(C)C	0.4	no
181	CAS:122-67-8	CC(C)COC(=O)C=Cc1ccccc1	CAS:7779-65-9	CC(C)CCOC(=O)C=Cc1ccccc1	[*:2]C.[*:1]OC(=O)C=Cc1ccccc1	[*:1]CC([*:2])C>>[*:1]CC[C@H]([*:2])C	0.4	no
182	CAS:7779-65-9	CC(C)CCOC(=O)C=Cc1ccccc1	CAS:122-67-8	CC(C)COC(=O)C=Cc1ccccc1	[*:2]C.[*:1]OC(=O)C=Cc1ccccc1	[*:1]CCC([*:2])C>>[*:1]C[C@H]([*:2])C	0.4	no
183	CAS:7779-65-9	CC(C)CCOC(=O)C=Cc1ccccc1	CAS:122-67-8	CC(C)COC(=O)C=Cc1ccccc1	[*:2]C.[*:1]OC(=O)C=Cc1ccccc1	[*:1]CCC([*:2])C>>[*:1]C[C@@H]([*:2])C	0.4	no
184	CAS:122-67-8	CC(C)COC(=O)C=Cc1ccccc1	CAS:7779-65-9	CC(C)CCOC(=O)C=Cc1ccccc1	[*:2]C.[*:3]C.[*:1]OC(=O)C=Cc1ccccc1	[*:1]CC([*:2])[*:3]>>[*:1]CCC([*:2])[*:3]	0.4	no
185	CAS:122-67-8	CC(C)COC(=O)C=Cc1ccccc1	CAS:7779-65-9	CC(C)CCOC(=O)C=Cc1ccccc1	[*:2]C.[*:1]OC(=O)C=Cc1ccccc1	[*:1]CC([*:2])C>>[*:1]CCC([*:2])C	0.4	no
186	CAS:92-66-0	Brc1ccc(-c2ccccc2)cc1	CAS:2051-62-9	Clc1ccc(-c2ccccc2)cc1	[*:1]c1ccc(-c2ccccc2)cc1	[*:1]Br>>[*:1]Cl	0.4	no
187	CAS:94-47-3	O=C(OCCc1ccccc1)c1ccccc1	CAS:102-16-9	O=C(Cc1ccccc1)OCc1ccccc1	[*:1]c1ccccc1.[*:2]c1ccccc1	[*:1]CCOC([*:2])=O>>[*:1]COC(=O)C[*:2]	0.39	no
188	CAS:103-41-3	O=C(C=Cc1ccccc1)OCc1ccccc1	CAS:94-47-3	O=C(OCCc1ccccc1)c1ccccc1	[*:1]c1ccccc1.[*:2]c1ccccc1	[*:1]C=CC(=O)OC[*:2]>>[*:1]CCOC([*:2])=O	0.39	no
189	CAS:18127-01-0	CC(C)(C)c1ccc(CCC=O)cc1	CAS:3101-60-8	CC(C)(C)c1ccc(OCC2CO2)cc1	[*:1]c1ccc(C(C)(C)C)cc1	[*:1]CCC=O>>[*:1]OCC1CO1	0.39	no
190	CAS:645-49-8	C(=C\c1ccccc1)\c1ccccc1	CAS:102-16-9	O=C(Cc1ccccc1)OCc1ccccc1	[*:1]c1ccccc1.[*:2]c1ccccc1	[*:1]/C=C\[*:2]>>[*:1]COC(=O)C[*:2]	0.38	no
191	CAS:92-59-1	CCN(Cc1ccccc1)c1ccccc1	CAS:495-48-7	[O-][N+](=Nc1ccccc1)c1ccccc1	[*:1]c1ccccc1.[*:2]c1ccccc1	[*:1]CN([*:2])CC>>[*:1]N=[N+]([*:2])[O-]	0.38	no
192	CAS:645-49-8	C(=C\c1ccccc1)\c1ccccc1	CAS:103-41-3	O=C(C=Cc1ccccc1)OCc1ccccc1	[*:1]c1ccccc1.[*:2]c1ccccc1	[*:1]/C=C\[*:2]>>[*:1]C=CC(=O)OC[*:2]	0.38	no
193	CAS:1210-39-5	O=CC=C(c1ccccc1)c1ccccc1	CAS:84-15-1	c1ccc(-c2ccccc2-c2ccccc2)cc1	[*:1]c1ccccc1.[*:2]c1ccccc1	[*:1]C([*:2])=CC=O>>[*:1]c1ccccc1[*:2]	0.38	no
194	CAS:2545-59-7	CCCCOCCOC(=O)COc1cc(Cl)c(Cl)cc1Cl	CAS:64700-56-7	CCCCOCCOC(=O)COc1nc(Cl)c(Cl)cc1Cl	[*:2]Cl.[*:3]Cl.[*:1]OCC(=O)OCCOCCCC	[*:1]c1cc([*:2])c(Cl)cc1[*:3]>>[*:2]c1cc(Cl)c([*:1])nc1[*:3]	0.38	no
195	CAS:2545-59-7	CCCCOCCOC(=O)COc1cc(Cl)c(Cl)cc1Cl	CAS:64700-56-7	CCCCOCCOC(=O)COc1nc(Cl)c(Cl)cc1Cl	[*:1]Cl.[*:2]Cl.[*:3]OCC(=O)OCCOCCCC	[*:1]c1cc([*:2])c(Cl)cc1[*:3]>>[*:1]c1cc([*:2])c(Cl)nc1[*:3]	0.38	no
196	CAS:2545-59-7	CCCCOCCOC(=O)COc1cc(Cl)c(Cl)cc1Cl	CAS:64700-56-7	CCCCOCCOC(=O)COc1nc(Cl)c(Cl)cc1Cl	[*:2]Cl.[*:3]Cl.[*:1]OCC(=O)OCCOCCCC	[*:1]c1cc([*:2])c(Cl)cc1[*:3]>>[*:2]c1cc([*:3])c(Cl)nc1[*:1]	0.38	no
197	CAS:2545-59-7	CCCCOCCOC(=O)COc1cc(Cl)c(Cl)cc1Cl	CAS:64700-56-7	CCCCOCCOC(=O)COc1nc(Cl)c(Cl)cc1Cl	[*:1]Cl.[*:2]Cl.[*:3]OCC(=O)OCCOCCCC	[*:1]c1cc([*:2])c(Cl)cc1[*:3]>>[*:1]c1cc(Cl)c([*:2])nc1[*:3]	0.38	no
198	CAS:2545-59-7	CCCCOCCOC(=O)COc1cc(Cl)c(Cl)cc1Cl	CAS:64700-56-7	CCCCOCCOC(=O)COc1nc(Cl)c(Cl)cc1Cl	[*:1]Cl.[*:2]Cl.[*:3]OCC(=O)OCCOCCCC	[*:1]c1cc([*:2])c(Cl)cc1[*:3]>>[*:1]c1cc(Cl)c([*:3])nc1[*:2]	0.38	no
199	CAS:2545-59-7	CCCCOCCOC(=O)COc1cc(Cl)c(Cl)cc1Cl	CAS:64700-56-7	CCCCOCCOC(=O)COc1nc(Cl)c(Cl)cc1Cl	[*:1]Cl.[*:3]Cl.[*:2]OCC(=O)OCCOCCCC	[*:1]c1cc([*:2])c(Cl)cc1[*:3]>>[*:1]c1cc([*:3])c(Cl)nc1[*:2]	0.38	no
200	CAS:2545-59-7	CCCCOCCOC(=O)COc1cc(Cl)c(Cl)cc1Cl	CAS:64700-56-7	CCCCOCCOC(=O)COc1nc(Cl)c(Cl)cc1Cl	[*:1]Cl.[*:3]Cl.[*:2]OCC(=O)OCCOCCCC	[*:1]c1cc([*:2])c(Cl)cc1[*:3]>>[*:1]c1cc(Cl)c([*:3])nc1[*:2]	0.38	no
201	CAS:2545-59-7	CCCCOCCOC(=O)COc1cc(Cl)c(Cl)cc1Cl	CAS:64700-56-7	CCCCOCCOC(=O)COc1nc(Cl)c(Cl)cc1Cl	[*:2]Cl.[*:3]Cl.[*:1]OCC(=O)OCCOCCCC	[*:1]c1cc([*:2])c(Cl)cc1[*:3]>>[*:2]c1cc(Cl)c([*:3])nc1[*:1]	0.38	no
202	CAS:2545-59-7	CCCCOCCOC(=O)COc1cc(Cl)c(Cl)cc1Cl	CAS:64700-56-7	CCCCOCCOC(=O)COc1nc(Cl)c(Cl)cc1Cl	[*:1]Cl.[*:3]Cl.[*:2]OCC(=O)OCCOCCCC	[*:1]c1cc([*:2])c(Cl)cc1[*:3]>>[*:1]c1cc(Cl)c([*:2])nc1[*:3]	0.38	no
203	CAS:139-66-2	c1ccc(Sc2ccccc2)cc1	CAS:92-06-8	c1ccc(-c2cccc(-c3ccccc3)c2)cc1	[*:1]c1ccccc1.[*:2]c1ccccc1	[*:1]S[*:2]>>[*:1]c1cccc([*:2])c1	0.38	no
204	CAS:1162-06-7	CC(=O)O[Pb](c1ccccc1)(c1ccccc1)c1ccccc1	CAS:639-58-7	Cl[Sn](c1ccccc1)(c1ccccc1)c1ccccc1	[*:1]c1ccccc1.[*:2]c1ccccc1.[*:3]c1ccccc1	[*:1][Pb]([*:2])([*:3])OC(C)=O>>[*:1][Sn]([*:2])([*:3])Cl	0.37	no
205	CAS:71441-28-6	C/C(=C\c1ccc(C(=O)O)cc1)c1ccc2c(c1)C(C)(C)CCC2(C)C	CAS:94497-51-5	CC1(C)CCC(C)(C)c2cc(NC(=O)c3ccc(C(=O)O)cc3)ccc21	[*:1]c1ccc(C(=O)O)cc1.[*:2]c1ccc2c(c1)C(C)(C)CCC2(C)C	[*:1]/C=C(/[*:2])C>>[*:2]NC([*:1])=O	0.37	no
206	CAS:94-11-1	CC(C)OC(=O)COc1ccc(Cl)cc1Cl	CAS:1928-38-7	COC(=O)COc1ccc(Cl)cc1Cl	[*:2]C.[*:1]COc1ccc(Cl)cc1Cl	[*:1]C(=O)O[C@H]([*:2])C>>[*:2]OC([*:1])=O	0.36	no
207	CAS:1928-38-7	COC(=O)COc1ccc(Cl)cc1Cl	CAS:94-11-1	CC(C)OC(=O)COc1ccc(Cl)cc1Cl	[*:1]OC(=O)COc1ccc(Cl)cc1Cl	[*:1]C>>[*:1]C(C)C	0.36	no
208	CAS:94-11-1	CC(C)OC(=O)COc1ccc(Cl)cc1Cl	CAS:1928-38-7	COC(=O)COc1ccc(Cl)cc1Cl	[*:2]C.[*:1]COc1ccc(Cl)cc1Cl	[*:1]C(=O)OC([*:2])C>>[*:2]OC([*:1])=O	0.36	no
209	CAS:94-11-1	CC(C)OC(=O)COc1ccc(Cl)cc1Cl	CAS:1928-38-7	COC(=O)COc1ccc(Cl)cc1Cl	[*:2]C.[*:1]COc1ccc(Cl)cc1Cl	[*:1]C(=O)O[C@@H]([*:2])C>>[*:2]OC([*:1])=O	0.36	no
210	CAS:1162-06-7	CC(=O)O[Pb](c1ccccc1)(c1ccccc1)c1ccccc1	CAS:76-87-9	O[Sn](c1ccccc1)(c1ccccc1)c1ccccc1	[*:1]c1ccccc1.[*:2]c1ccccc1.[*:3]c1ccccc1	[*:1][Pb]([*:2])([*:3])OC(C)=O>>[*:1][Sn]([*:2])([*:3])O	0.36	no
211	CAS:66246-88-6	CCCC(Cn1cncn1)c1ccc(Cl)cc1Cl	CAS:60207-90-1	CCCC1COC(Cn2cncn2)(c2ccc(Cl)cc2Cl)O1	[*:3]CCC.[*:2]c1ccc(Cl)cc1Cl.[*:1]n1cncn1	[*:1]CC([*:2])[*:3]>>[*:1]CC1([*:2])OCC([*:3])O1	0.36	no
212	CAS:66246-88-6	CCCC(Cn1cncn1)c1ccc(Cl)cc1Cl	CAS:60207-90-1	CCCC1COC(Cn2cncn2)(c2ccc(Cl)cc2Cl)O1	[*:1]CCC.[*:2]Cn1cncn1.[*:3]c1ccc(Cl)cc1Cl	[*:1]C([*:2])[*:3]>>[*:1]C1COC([*:2])([*:3])O1	0.36	no
213	CAS:538-74-9	c1ccc(CSCc2ccccc2)cc1	CAS:103-33-3	c1ccc(N=Nc2ccccc2)cc1	[*:1]c1ccccc1.[*:2]c1ccccc1	[*:1]CSC[*:2]>>[*:1]N=N[*:2]	0.35	no
214	CAS:122008-85-9	CCCCOC(=O)[CH](C)Oc1ccc(Oc2ccc(C#N)cc2F)cc1	CAS:79241-46-6	CCCCOC(=O)[CH](C)Oc1ccc(Oc2ccc(C(F)(F)F)cn2)cc1	[*:2]F.[*:1]Oc1ccc(OC(C)C(=O)OCCCC)cc1	[*:1]c1ccc(C#N)cc1[*:2]>>[*:1]c1ccc(C([*:2])(F)F)cn1	0.35	no
215	CAS:451-40-1	O=C(Cc1ccccc1)c1ccccc1	CAS:139-66-2	c1ccc(Sc2ccccc2)cc1	[*:1]c1ccccc1.[*:2]c1ccccc1	[*:1]CC([*:2])=O>>[*:1]S[*:2]	0.35	no
216	CAS:645-49-8	C(=C\c1ccccc1)\c1ccccc1	CAS:622-20-8	c1ccc(SCCSc2ccccc2)cc1	[*:1]c1ccccc1.[*:2]c1ccccc1	[*:1]/C=C\[*:2]>>[*:1]SCCS[*:2]	0.35	no
217	CAS:86-29-3	N#CC(c1ccccc1)c1ccccc1	CAS:538-74-9	c1ccc(CSCc2ccccc2)cc1	[*:1]c1ccccc1.[*:2]c1ccccc1	[*:1]C([*:2])C#N>>[*:1]CSC[*:2]	0.35	no
218	CAS:778-22-3	CC(C)(c1ccccc1)c1ccccc1	CAS:538-74-9	c1ccc(CSCc2ccccc2)cc1	[*:1]c1ccccc1.[*:2]c1ccccc1	[*:1]C([*:2])(C)C>>[*:1]CSC[*:2]	0.35	no
219	CAS:778-22-3	CC(C)(c1ccccc1)c1ccccc1	CAS:139-66-2	c1ccc(Sc2ccccc2)cc1	[*:1]c1ccccc1.[*:2]c1ccccc1	[*:1]C([*:2])(C)C>>[*:1]S[*:2]	0.35	no
220	CAS:86-29-3	N#CC(c1ccccc1)c1ccccc1	CAS:139-66-2	c1ccc(Sc2ccccc2)cc1	[*:1]c1ccccc1.[*:2]c1ccccc1	[*:1]C([*:2])C#N>>[*:1]S[*:2]	0.34	no
221	CAS:103-29-7	c1ccc(CCc2ccccc2)cc1	CAS:102-09-0	O=C(Oc1ccccc1)Oc1ccccc1	[*:1]c1ccccc1.[*:2]c1ccccc1	[*:1]CC[*:2]>>[*:1]OC(=O)O[*:2]	0.34	no
222	CAS:451-40-1	O=C(Cc1ccccc1)c1ccccc1	CAS:538-74-9	c1ccc(CSCc2ccccc2)cc1	[*:2]Cc1ccccc1.[*:1]c1ccccc1	[*:1]C([*:2])=O>>[*:1]CS[*:2]	0.34	no
223	CAS:451-40-1	O=C(Cc1ccccc1)c1ccccc1	CAS:538-74-9	c1ccc(CSCc2ccccc2)cc1	[*:1]c1ccccc1.[*:2]c1ccccc1	[*:1]CC([*:2])=O>>[*:1]CSC[*:2]	0.34	no
224	CAS:103-52-6	CCCC(=O)OCCc1ccccc1	CAS:6290-37-5	CCCCCC(=O)OCCc1ccccc1	[*:1]C(=O)OCCc1ccccc1	[*:1]CCC>>[*:1]CCCCC	0.34	no
225	CAS:71441-28-6	C/C(=C\c1ccc(C(=O)O)cc1)c1ccc2c(c1)C(C)(C)CCC2(C)C	CAS:102121-60-8	CC1(C)CCC(C)(C)c2cc(C(=O)Nc3ccc(C(=O)O)cc3)ccc21	[*:1]c1ccc(C(=O)O)cc1.[*:2]c1ccc2c(c1)C(C)(C)CCC2(C)C	[*:1]/C=C(/[*:2])C>>[*:1]NC([*:2])=O	0.34	no
226	CAS:103-33-3	c1ccc(N=Nc2ccccc2)cc1	CAS:139-66-2	c1ccc(Sc2ccccc2)cc1	[*:1]c1ccccc1.[*:2]c1ccccc1	[*:1]N=N[*:2]>>[*:1]S[*:2]	0.34	no
227	CAS:94-47-3	O=C(OCCc1ccccc1)c1ccccc1	CAS:622-20-8	c1ccc(SCCSc2ccccc2)cc1	[*:1]c1ccccc1.[*:2]c1ccccc1	[*:1]CCOC([*:2])=O>>[*:1]SCCS[*:2]	0.34	no
228	CAS:103-41-3	O=C(C=Cc1ccccc1)OCc1ccccc1	CAS:102-20-5	O=C(Cc1ccccc1)OCCc1ccccc1	[*:1]c1ccccc1.[*:2]c1ccccc1	[*:1]C=CC(=O)OC[*:2]>>[*:1]CCOC(=O)C[*:2]	0.34	no
229	CAS:103-41-3	O=C(C=Cc1ccccc1)OCc1ccccc1	CAS:102-20-5	O=C(Cc1ccccc1)OCCc1ccccc1	[*:2]Cc1ccccc1.[*:1]c1ccccc1	[*:1]C=CC(=O)O[*:2]>>[*:1]CCOC([*:2])=O	0.34	no
230	CAS:94-91-7	CC(C/N=C/c1ccccc1O)/N=C/c1ccccc1O	CAS:835-11-0	O=C(c1ccccc1O)c1ccccc1O	[*:1]c1ccccc1O.[*:2]c1ccccc1O	[*:1]/C=N/CC(C)/N=C/[*:2]>>[*:1]C([*:2])=O	0.34	no
231	CAS:102-16-9	O=C(Cc1ccccc1)OCc1ccccc1	CAS:102-20-5	O=C(Cc1ccccc1)OCCc1ccccc1	[*:2]Cc1ccccc1.[*:1]c1ccccc1	[*:1]CC(=O)O[*:2]>>[*:1]CCOC([*:2])=O	0.34	no
232	CAS:102-20-5	O=C(Cc1ccccc1)OCCc1ccccc1	CAS:102-16-9	O=C(Cc1ccccc1)OCc1ccccc1	[*:1]c1ccccc1.[*:2]c1ccccc1	[*:1]CCOC(=O)C[*:2]>>[*:1]COC(=O)C[*:2]	0.34	no
233	CAS:102-16-9	O=C(Cc1ccccc1)OCc1ccccc1	CAS:102-20-5	O=C(Cc1ccccc1)OCCc1ccccc1	[*:1]OC(=O)Cc1ccccc1.[*:2]c1ccccc1	[*:1]C[*:2]>>[*:1]CC[*:2]	0.34	no
234	CAS:102-20-5	O=C(Cc1ccccc1)OCCc1ccccc1	CAS:102-16-9	O=C(Cc1ccccc1)OCc1ccccc1	[*:2]Cc1ccccc1.[*:1]c1ccccc1	[*:1]CCOC([*:2])=O>>[*:1]COC([*:2])=O	0.34	no
235	CAS:495-48-7	[O-][N+](=Nc1ccccc1)c1ccccc1	CAS:102-09-0	O=C(Oc1ccccc1)Oc1ccccc1	[*:1]c1ccccc1.[*:2]c1ccccc1	[*:1]N=[N+]([*:2])[O-]>>[*:1]OC(=O)O[*:2]	0.34	no
236	CAS:115-32-2	OC(c1ccc(Cl)cc1)(c1ccc(Cl)cc1)C(Cl)(Cl)Cl	CAS:72-55-9	ClC(Cl)=C(c1ccc(Cl)cc1)c1ccc(Cl)cc1	[*:3]Cl.[*:1]c1ccc(Cl)cc1.[*:2]c1ccc(Cl)cc1	[*:1]C([*:2])(O)C([*:3])(Cl)Cl>>[*:1]C([*:2])=C([*:3])Cl	0.33	no
237	CAS:115-32-2	OC(c1ccc(Cl)cc1)(c1ccc(Cl)cc1)C(Cl)(Cl)Cl	CAS:72-55-9	ClC(Cl)=C(c1ccc(Cl)cc1)c1ccc(Cl)cc1	[*:1]c1ccc(Cl)cc1.[*:2]c1ccc(Cl)cc1	[*:1]C([*:2])(O)C(Cl)(Cl)Cl>>[*:1]C([*:2])=C(Cl)Cl	0.33	no
238	CAS:94-11-1	CC(C)OC(=O)COc1ccc(Cl)cc1Cl	CAS:533-23-3	CCOC(=O)COc1ccc(Cl)cc1Cl	[*:1][C@@H](C)OC(=O)COc1ccc(Cl)cc1Cl	[*:1]C>>[*:1][H]	0.33	no
239	CAS:94-11-1	CC(C)OC(=O)COc1ccc(Cl)cc1Cl	CAS:533-23-3	CCOC(=O)COc1ccc(Cl)cc1Cl	[*:1][C@H](C)OC(=O)COc1ccc(Cl)cc1Cl	[*:1]C>>[*:1][H]	0.33	no
240	CAS:94-11-1	CC(C)OC(=O)COc1ccc(Cl)cc1Cl	CAS:533-23-3	CCOC(=O)COc1ccc(Cl)cc1Cl	[*:1]OC(=O)COc1ccc(Cl)cc1Cl	[*:1]C(C)C>>[*:1]CC	0.33	no
241	CAS:94-11-1	CC(C)OC(=O)COc1ccc(Cl)cc1Cl	CAS:533-23-3	CCOC(=O)COc1ccc(Cl)cc1Cl	[*:1]C(C)OC(=O)COc1ccc(Cl)cc1Cl	[*:1]C>>[*:1][H]	0.33	no
242	CAS:639-58-7	Cl[Sn](c1ccccc1)(c1ccccc1)c1ccccc1	CAS:900-95-8	CC(=O)O[Sn](c1ccccc1)(c1ccccc1)c1ccccc1	[*:1]c1ccccc1.[*:2]c1ccccc1.[*:3]c1ccccc1	[*:1][Sn]([*:2])([*:3])Cl>>[*:1][Sn]([*:2])([*:3])OC(C)=O	0.32	no
243	CAS:102-16-9	O=C(Cc1ccccc1)OCc1ccccc1	CAS:103-33-3	c1ccc(N=Nc2ccccc2)cc1	[*:1]c1ccccc1.[*:2]c1ccccc1	[*:1]COC(=O)C[*:2]>>[*:1]N=N[*:2]	0.32	no
244	CAS:103-41-3	O=C(C=Cc1ccccc1)OCc1ccccc1	CAS:103-33-3	c1ccc(N=Nc2ccccc2)cc1	[*:1]c1ccccc1.[*:2]c1ccccc1	[*:1]C=CC(=O)OC[*:2]>>[*:1]N=N[*:2]	0.32	no
245	CAS:538-74-9	c1ccc(CSCc2ccccc2)cc1	CAS:92-06-8	c1ccc(-c2cccc(-c3ccccc3)c2)cc1	[*:1]c1ccccc1.[*:2]c1ccccc1	[*:1]CSC[*:2]>>[*:1]c1cccc([*:2])c1	0.32	no
246	CAS:76-87-9	O[Sn](c1ccccc1)(c1ccccc1)c1ccccc1	CAS:900-95-8	CC(=O)O[Sn](c1ccccc1)(c1ccccc1)c1ccccc1	[*:1]c1ccccc1.[*:2]c1ccccc1.[*:3]c1ccccc1	[*:1][Sn]([*:2])([*:3])O>>[*:1][Sn]([*:2])([*:3])OC(C)=O	0.31	no
247	CAS:705-60-2	CC(=Cc1ccccc1)[N+](=O)[O-]	CAS:102-96-5	O=[N+]([O-])C=Cc1ccccc1	[*:2][N+](=O)[O-].[*:1]c1ccccc1	[*:1]C=C([*:2])C>>[*:1]C=C[*:2]	0.31	no
248	CAS:705-60-2	CC(=Cc1ccccc1)[N+](=O)[O-]	CAS:102-96-5	O=[N+]([O-])C=Cc1ccccc1	[*:1]C(=Cc1ccccc1)[N+](=O)[O-]	[*:1]C>>[*:1][H]	0.31	no
249	CAS:86-29-3	N#CC(c1ccccc1)c1ccccc1	CAS:102-16-9	O=C(Cc1ccccc1)OCc1ccccc1	[*:1]c1ccccc1.[*:2]c1ccccc1	[*:1]C([*:2])C#N>>[*:1]COC(=O)C[*:2]	0.31	no
250	CAS:778-22-3	CC(C)(c1ccccc1)c1ccccc1	CAS:102-16-9	O=C(Cc1ccccc1)OCc1ccccc1	[*:1]c1ccccc1.[*:2]c1ccccc1	[*:1]C([*:2])(C)C>>[*:1]COC(=O)C[*:2]	0.31	no
251	CAS:86-29-3	N#CC(c1ccccc1)c1ccccc1	CAS:103-41-3	O=C(C=Cc1ccccc1)OCc1ccccc1	[*:1]c1ccccc1.[*:2]c1ccccc1	[*:1]C([*:2])C#N>>[*:1]C=CC(=O)OC[*:2]	0.31	no
252	CAS:778-22-3	CC(C)(c1ccccc1)c1ccccc1	CAS:103-41-3	O=C(C=Cc1ccccc1)OCc1ccccc1	[*:1]c1ccccc1.[*:2]c1ccccc1	[*:1]C([*:2])(C)C>>[*:1]C=CC(=O)OC[*:2]	0.31	no
253	CAS:72-55-9	ClC(Cl)=C(c1ccc(Cl)cc1)c1ccc(Cl)cc1	CAS:50-29-3	Clc1ccc(C(c2ccc(Cl)cc2)C(Cl)(Cl)Cl)cc1	[*:1]c1ccc(Cl)cc1.[*:2]c1ccc(Cl)cc1	[*:1]C([*:2])=C(Cl)Cl>>[*:1]C([*:2])C(Cl)(Cl)Cl	0.31	no
254	CAS:72-55-9	ClC(Cl)=C(c1ccc(Cl)cc1)c1ccc(Cl)cc1	CAS:50-29-3	Clc1ccc(C(c2ccc(Cl)cc2)C(Cl)(Cl)Cl)cc1	[*:3]Cl.[*:1]c1ccc(Cl)cc1.[*:2]c1ccc(Cl)cc1	[*:1]C([*:2])=C([*:3])Cl>>[*:1]C([*:2])C([*:3])(Cl)Cl	0.31	no
255	CAS:451-40-1	O=C(Cc1ccccc1)c1ccccc1	CAS:102-16-9	O=C(Cc1ccccc1)OCc1ccccc1	[*:2]Cc1ccccc1.[*:1]c1ccccc1	[*:1]C([*:2])=O>>[*:1]CC(=O)O[*:2]	0.31	no
256	CAS:451-40-1	O=C(Cc1ccccc1)c1ccccc1	CAS:102-16-9	O=C(Cc1ccccc1)OCc1ccccc1	[*:1]c1ccccc1.[*:2]c1ccccc1	[*:1]CC([*:2])=O>>[*:1]COC(=O)C[*:2]	0.31	no
257	CAS:451-40-1	O=C(Cc1ccccc1)c1ccccc1	CAS:102-16-9	O=C(Cc1ccccc1)OCc1ccccc1	[*:2]Cc1ccccc1.[*:1]c1ccccc1	[*:1]C([*:2])=O>>[*:1]COC([*:2])=O	0.31	no
258	CAS:1210-39-5	O=CC=C(c1ccccc1)c1ccccc1	CAS:102-09-0	O=C(Oc1ccccc1)Oc1ccccc1	[*:1]c1ccccc1.[*:2]c1ccccc1	[*:1]C([*:2])=CC=O>>[*:1]OC(=O)O[*:2]	0.31	no
259	CAS:451-40-1	O=C(Cc1ccccc1)c1ccccc1	CAS:103-41-3	O=C(C=Cc1ccccc1)OCc1ccccc1	[*:2]Cc1ccccc1.[*:1]c1ccccc1	[*:1]C([*:2])=O>>[*:1]C=CC(=O)O[*:2]	0.3	no
260	CAS:103-41-3	O=C(C=Cc1ccccc1)OCc1ccccc1	CAS:451-40-1	O=C(Cc1ccccc1)c1ccccc1	[*:1]c1ccccc1.[*:2]c1ccccc1	[*:1]C=CC(=O)OC[*:2]>>[*:1]CC([*:2])=O	0.3	no
261	CAS:1928-47-8	CCCCC(CC)COC(=O)COc1cc(Cl)c(Cl)cc1Cl	CAS:2545-59-7	CCCCOCCOC(=O)COc1cc(Cl)c(Cl)cc1Cl	[*:2]CCCC.[*:1]OC(=O)COc1cc(Cl)c(Cl)cc1Cl	[*:1]CC([*:2])CC>>[*:1]CCO[*:2]	0.3	no
262	CAS:1928-47-8	CCCCC(CC)COC(=O)COc1cc(Cl)c(Cl)cc1Cl	CAS:2545-59-7	CCCCOCCOC(=O)COc1cc(Cl)c(Cl)cc1Cl	[*:2]CCCC.[*:1]COc1cc(Cl)c(Cl)cc1Cl	[*:1]C(=O)OCC([*:2])CC>>[*:2]OCCOC([*:1])=O	0.3	no
263	CAS:23593-75-1	Clc1ccccc1C(c1ccccc1)(c1ccccc1)n1ccnc1	CAS:60628-96-8	c1ccc(-c2ccc(C(c3ccccc3)n3ccnc3)cc2)cc1	[*:1]c1ccccc1.[*:2]c1ccccc1.[*:3]n1ccnc1	[*:1]C([*:2])([*:3])c1ccccc1Cl>>[*:1]c1ccc(C([*:2])[*:3])cc1	0.3	no
264	CAS:1210-39-5	O=CC=C(c1ccccc1)c1ccccc1	CAS:882-33-7	c1ccc(SSc2ccccc2)cc1	[*:1]c1ccccc1.[*:2]c1ccccc1	[*:1]C([*:2])=CC=O>>[*:1]SS[*:2]	0.3	no
265	CAS:102-20-5	O=C(Cc1ccccc1)OCCc1ccccc1	CAS:538-74-9	c1ccc(CSCc2ccccc2)cc1	[*:2]Cc1ccccc1.[*:1]c1ccccc1	[*:1]CCOC([*:2])=O>>[*:1]CS[*:2]	0.3	no
266	CAS:102-20-5	O=C(Cc1ccccc1)OCCc1ccccc1	CAS:538-74-9	c1ccc(CSCc2ccccc2)cc1	[*:1]c1ccccc1.[*:2]c1ccccc1	[*:1]CCOC(=O)C[*:2]>>[*:1]CSC[*:2]	0.3	no
267	CAS:103-53-7	O=C(C=Cc1ccccc1)OCCc1ccccc1	CAS:94-47-3	O=C(OCCc1ccccc1)c1ccccc1	[*:2]CCc1ccccc1.[*:1]c1ccccc1	[*:1]C=CC(=O)O[*:2]>>[*:2]OC([*:1])=O	0.3	no
268	CAS:72-55-9	ClC(Cl)=C(c1ccc(Cl)cc1)c1ccc(Cl)cc1	CAS:80-07-9	O=S(=O)(c1ccc(Cl)cc1)c1ccc(Cl)cc1	[*:1]c1ccc(Cl)cc1.[*:2]c1ccc(Cl)cc1	[*:1]C([*:2])=C(Cl)Cl>>[*:1]S([*:2])(=O)=O	0.29	no
269	CAS:5598-15-2	CCOP(=O)(OCC)Oc1nc(Cl)c(Cl)cc1Cl	CAS:2921-88-2	CCOP(=S)(OCC)Oc1nc(Cl)c(Cl)cc1Cl	[*:1]CC.[*:2]CC.[*:3]c1nc(Cl)c(Cl)cc1Cl	[*:1]OP(=O)(O[*:2])O[*:3]>>[*:1]OP(=S)(O[*:2])O[*:3]	0.29	no
270	CAS:90-98-2	O=C(c1ccc(Cl)cc1)c1ccc(Cl)cc1	CAS:134-85-0	O=C(c1ccccc1)c1ccc(Cl)cc1	[*:1]c1ccc(C(=O)c2ccc(Cl)cc2)cc1	[*:1]Cl>>[*:1][H]	0.29	no
271	CAS:58-72-0	C(=C(c1ccccc1)c1ccccc1)c1ccccc1	CAS:379-52-2	F[Sn](c1ccccc1)(c1ccccc1)c1ccccc1	[*:1]c1ccccc1.[*:2]c1ccccc1.[*:3]c1ccccc1	[*:1]C=C([*:2])[*:3]>>[*:1][Sn]([*:2])([*:3])F	0.29	no
272	CAS:639-58-7	Cl[Sn](c1ccccc1)(c1ccccc1)c1ccccc1	CAS:379-52-2	F[Sn](c1ccccc1)(c1ccccc1)c1ccccc1	[*:1]c1ccccc1.[*:2]c1ccccc1.[*:3]c1ccccc1	[*:1][Sn]([*:2])([*:3])Cl>>[*:1][Sn]([*:2])([*:3])F	0.28	no
273	CAS:495-48-7	[O-][N+](=Nc1ccccc1)c1ccccc1	CAS:622-20-8	c1ccc(SCCSc2ccccc2)cc1	[*:1]c1ccccc1.[*:2]c1ccccc1	[*:1]N=[N+]([*:2])[O-]>>[*:1]SCCS[*:2]	0.28	no
274	CAS:102-16-9	O=C(Cc1ccccc1)OCc1ccccc1	CAS:92-06-8	c1ccc(-c2cccc(-c3ccccc3)c2)cc1	[*:1]c1ccccc1.[*:2]c1ccccc1	[*:1]COC(=O)C[*:2]>>[*:1]c1cccc([*:2])c1	0.28	no
275	CAS:103-41-3	O=C(C=Cc1ccccc1)OCc1ccccc1	CAS:92-06-8	c1ccc(-c2cccc(-c3ccccc3)c2)cc1	[*:1]c1ccccc1.[*:2]c1ccccc1	[*:1]C=CC(=O)OC[*:2]>>[*:1]c1cccc([*:2])c1	0.28	no
276	CAS:94-47-3	O=C(OCCc1ccccc1)c1ccccc1	CAS:102-09-0	O=C(Oc1ccccc1)Oc1ccccc1	[*:1]c1ccccc1.[*:2]c1ccccc1	[*:1]CCOC([*:2])=O>>[*:1]OC(=O)O[*:2]	0.28	no
277	CAS:72-55-9	ClC(Cl)=C(c1ccc(Cl)cc1)c1ccc(Cl)cc1	CAS:80-33-1	O=S(=O)(Oc1ccc(Cl)cc1)c1ccc(Cl)cc1	[*:1]c1ccc(Cl)cc1.[*:2]c1ccc(Cl)cc1	[*:1]C([*:2])=C(Cl)Cl>>[*:1]OS([*:2])(=O)=O	0.28	no
278	CAS:2113-57-7	Brc1cccc(-c2ccccc2)c1	CAS:92-06-8	c1ccc(-c2cccc(-c3ccccc3)c2)cc1	[*:1]c1cccc(-c2ccccc2)c1	[*:1]Br>>[*:1]c1ccccc1	0.28	no
279	CAS:56917-29-4	C#Cc1ccc(-c2ccccc2F)cc1	CAS:321-60-8	Fc1ccccc1-c1ccccc1	[*:1]c1ccc(-c2ccccc2F)cc1	[*:1]C#C>>[*:1][H]	0.28	no
280	CAS:379-52-2	F[Sn](c1ccccc1)(c1ccccc1)c1ccccc1	CAS:76-87-9	O[Sn](c1ccccc1)(c1ccccc1)c1ccccc1	[*:1]c1ccccc1.[*:2]c1ccccc1.[*:3]c1ccccc1	[*:1][Sn]([*:2])([*:3])F>>[*:1][Sn]([*:2])([*:3])O	0.28	no
281	CAS:55719-85-2	C/C=C(\C)C(=O)OCCc1ccccc1	CAS:24817-51-4	CCC(C)C(=O)OCCc1ccccc1	[*:1]C.[*:2]C(=O)OCCc1ccccc1	[*:1]/C=C(\[*:2])C>>[*:1]C([*:2])CC	0.27	no
282	CAS:55719-85-2	C/C=C(\C)C(=O)OCCc1ccccc1	CAS:24817-51-4	CCC(C)C(=O)OCCc1ccccc1	[*:1]C(=O)OCCc1ccccc1	[*:1]/C(C)=C/C>>[*:1]C(C)CC	0.27	no
283	CAS:55719-85-2	C/C=C(\C)C(=O)OCCc1ccccc1	CAS:24817-51-4	CCC(C)C(=O)OCCc1ccccc1	[*:1]C.[*:2]C(=O)OCCc1ccccc1	[*:1]C([*:2])=CC>>[*:1]C([*:2])CC	0.27	no
284	CAS:538-74-9	c1ccc(CSCc2ccccc2)cc1	CAS:104-66-5	c1ccc(OCCOc2ccccc2)cc1	[*:1]c1ccccc1.[*:2]c1ccccc1	[*:1]CSC[*:2]>>[*:1]OCCO[*:2]	0.27	no
285	CAS:645-49-8	C(=C\c1ccccc1)\c1ccccc1	CAS:139-66-2	c1ccc(Sc2ccccc2)cc1	[*:1]c1ccccc1.[*:2]c1ccccc1	[*:1]/C=C\[*:2]>>[*:1]S[*:2]	0.27	no
286	CAS:10287-53-3	CCOC(=O)c1ccc(N(C)C)cc1	CAS:21245-01-2	CC(C)CCOC(=O)c1ccc(N(C)C)cc1	[*:1]OC(=O)c1ccc(N(C)C)cc1	[*:1]CC>>[*:1]CCC(C)C	0.27	no
287	CAS:21245-01-2	CC(C)CCOC(=O)c1ccc(N(C)C)cc1	CAS:10287-53-3	CCOC(=O)c1ccc(N(C)C)cc1	[*:1]CCOC(=O)c1ccc(N(C)C)cc1	[*:1]C(C)C>>[*:1][H]	0.27	no
288	CAS:886-08-8	Oc1ccccc1C=NCc1ccccc1	CAS:118-58-1	O=C(OCc1ccccc1)c1ccccc1O	[*:2]c1ccccc1.[*:1]c1ccccc1O	[*:1]C=NC[*:2]>>[*:2]COC([*:1])=O	0.27	no
289	CAS:886-08-8	Oc1ccccc1C=NCc1ccccc1	CAS:118-58-1	O=C(OCc1ccccc1)c1ccccc1O	[*:2]Cc1ccccc1.[*:1]c1ccccc1O	[*:1]C=N[*:2]>>[*:2]OC([*:1])=O	0.27	no
290	CAS:86-29-3	N#CC(c1ccccc1)c1ccccc1	CAS:5232-99-5	CCOC(=O)C(C#N)=C(c1ccccc1)c1ccccc1	[*:3]C#N.[*:1]c1ccccc1.[*:2]c1ccccc1	[*:1]C([*:2])[*:3]>>[*:1]C([*:2])=C([*:3])C(=O)OCC	0.27	no
291	CAS:645-49-8	C(=C\c1ccccc1)\c1ccccc1	CAS:102-09-0	O=C(Oc1ccccc1)Oc1ccccc1	[*:1]c1ccccc1.[*:2]c1ccccc1	[*:1]/C=C\[*:2]>>[*:1]OC(=O)O[*:2]	0.27	no
292	CAS:21245-02-3	CCCCC(CC)COC(=O)c1ccc(N(C)C)cc1	CAS:5444-75-7	CCCCC(CC)COC(=O)c1ccccc1	[*:1]c1ccc(C(=O)OCC(CC)CCCC)cc1	[*:1]N(C)C>>[*:1][H]	0.26	no
293	CAS:103-29-7	c1ccc(CCc2ccccc2)cc1	CAS:882-33-7	c1ccc(SSc2ccccc2)cc1	[*:1]c1ccccc1.[*:2]c1ccccc1	[*:1]CC[*:2]>>[*:1]SS[*:2]	0.26	no
294	CAS:94-47-3	O=C(OCCc1ccccc1)c1ccccc1	CAS:139-66-2	c1ccc(Sc2ccccc2)cc1	[*:1]c1ccccc1.[*:2]c1ccccc1	[*:1]CCOC([*:2])=O>>[*:1]S[*:2]	0.26	no
295	CAS:495-48-7	[O-][N+](=Nc1ccccc1)c1ccccc1	CAS:84-15-1	c1ccc(-c2ccccc2-c2ccccc2)cc1	[*:1]c1ccccc1.[*:2]c1ccccc1	[*:1]N=[N+]([*:2])[O-]>>[*:1]c1ccccc1[*:2]	0.26	no
296	CAS:68359-37-5	CC1(C)C(C=C(Cl)Cl)C1C(=O)OC(C#N)c1ccc(F)c(Oc2ccccc2)c1	CAS:67375-30-8	CC1(C)[CH](C=C(Cl)Cl)[CH]1C(=O)O[CH](C#N)c1cccc(Oc2ccccc2)c1	[*:2]C(C#N)OC(=O)C1C(C=C(Cl)Cl)C1(C)C.[*:1]c1ccccc1	[*:1]Oc1cc([*:2])ccc1F>>[*:1]Oc1cccc([*:2])c1	0.26	no
297	CAS:68359-37-5	CC1(C)C(C=C(Cl)Cl)C1C(=O)OC(C#N)c1ccc(F)c(Oc2ccccc2)c1	CAS:67375-30-8	CC1(C)[CH](C=C(Cl)Cl)[CH]1C(=O)O[CH](C#N)c1cccc(Oc2ccccc2)c1	[*:1]C(C#N)OC(=O)C1C(C=C(Cl)Cl)C1(C)C.[*:2]Oc1ccccc1	[*:1]c1ccc(F)c([*:2])c1>>[*:1]c1cccc([*:2])c1	0.26	no
298	CAS:68359-37-5	CC1(C)C(C=C(Cl)Cl)C1C(=O)OC(C#N)c1ccc(F)c(Oc2ccccc2)c1	CAS:67375-30-8	CC1(C)[CH](C=C(Cl)Cl)[CH]1C(=O)O[CH](C#N)c1cccc(Oc2ccccc2)c1	[*:2]C#N.[*:3]OC(=O)C1C(C=C(Cl)Cl)C1(C)C.[*:1]c1ccccc1	[*:1]Oc1cc(C([*:2])[*:3])ccc1F>>[*:1]Oc1cccc(C([*:2])[*:3])c1	0.26	no
299	CAS:68359-37-5	CC1(C)C(C=C(Cl)Cl)C1C(=O)OC(C#N)c1ccc(F)c(Oc2ccccc2)c1	CAS:67375-30-8	CC1(C)[CH](C=C(Cl)Cl)[CH]1C(=O)O[CH](C#N)c1cccc(Oc2ccccc2)c1	[*:2]C#N.[*:3]OC(=O)C1C(C=C(Cl)Cl)C1(C)C.[*:1]Oc1ccccc1	[*:1]c1cc(C([*:2])[*:3])ccc1F>>[*:1]c1cccc(C([*:2])[*:3])c1	0.26	no
300	CAS:68359-37-5	CC1(C)C(C=C(Cl)Cl)C1C(=O)OC(C#N)c1ccc(F)c(Oc2ccccc2)c1	CAS:67375-30-8	CC1(C)[CH](C=C(Cl)Cl)[CH]1C(=O)O[CH](C#N)c1cccc(Oc2ccccc2)c1	[*:1]c1ccc(C(C#N)OC(=O)C2C(C=C(Cl)Cl)C2(C)C)cc1Oc1ccccc1	[*:1]F>>[*:1][H]	0.26	no
301	CAS:92-59-1	CCN(Cc1ccccc1)c1ccccc1	CAS:5232-99-5	CCOC(=O)C(C#N)=C(c1ccccc1)c1ccccc1	[*:2]CC.[*:1]c1ccccc1.[*:3]c1ccccc1	[*:1]CN([*:2])[*:3]>>[*:2]OC(=O)C(C#N)=C([*:1])[*:3]	0.26	no
302	CAS:10094-34-5	CCCC(=O)OC(C)(C)Cc1ccccc1	CAS:103-52-6	CCCC(=O)OCCc1ccccc1	[*:2]OC(=O)CCC.[*:1]c1ccccc1	[*:1]CC([*:2])(C)C>>[*:1]CC[*:2]	0.25	no
303	CAS:72-55-9	ClC(Cl)=C(c1ccc(Cl)cc1)c1ccc(Cl)cc1	CAS:72-54-8	Clc1ccc(C(c2ccc(Cl)cc2)C(Cl)Cl)cc1	[*:3]Cl.[*:1]c1ccc(Cl)cc1.[*:2]c1ccc(Cl)cc1	[*:1]C([*:2])=C([*:3])Cl>>[*:1]C([*:2])C([*:3])Cl	0.25	no
304	CAS:72-55-9	ClC(Cl)=C(c1ccc(Cl)cc1)c1ccc(Cl)cc1	CAS:72-54-8	Clc1ccc(C(c2ccc(Cl)cc2)C(Cl)Cl)cc1	[*:1]c1ccc(Cl)cc1.[*:2]c1ccc(Cl)cc1	[*:1]C([*:2])=C(Cl)Cl>>[*:1]C([*:2])C(Cl)Cl	0.25	no
305	CAS:72-55-9	ClC(Cl)=C(c1ccc(Cl)cc1)c1ccc(Cl)cc1	CAS:72-54-8	Clc1ccc(C(c2ccc(Cl)cc2)C(Cl)Cl)cc1	[*:3]Cl.[*:1]c1ccc(Cl)cc1.[*:2]c1ccc(Cl)cc1	[*:1]C([*:2])=C([*:3])Cl>>[*:1]C([*:2])[C@H]([*:3])Cl	0.25	no
306	CAS:72-55-9	ClC(Cl)=C(c1ccc(Cl)cc1)c1ccc(Cl)cc1	CAS:72-54-8	Clc1ccc(C(c2ccc(Cl)cc2)C(Cl)Cl)cc1	[*:3]Cl.[*:1]c1ccc(Cl)cc1.[*:2]c1ccc(Cl)cc1	[*:1]C([*:2])=C([*:3])Cl>>[*:1]C([*:2])[C@@H]([*:3])Cl	0.25	no
307	CAS:66346-01-8	CC(C)(C)C(=O)CCc1ccc(Cl)cc1	CAS:80443-63-6	CC(C)(C)C1(CCc2ccc(Cl)cc2)CO1	[*:2]C(C)(C)C.[*:1]c1ccc(Cl)cc1	[*:1]CCC([*:2])=O>>[*:1]CCC1([*:2])CO1	0.25	no
308	CAS:66346-01-8	CC(C)(C)C(=O)CCc1ccc(Cl)cc1	CAS:80443-63-6	CC(C)(C)C1(CCc2ccc(Cl)cc2)CO1	[*:1]C(C)(C)C.[*:2]CCc1ccc(Cl)cc1	[*:1]C([*:2])=O>>[*:1]C1([*:2])CO1	0.25	no
309	CAS:80443-63-6	CC(C)(C)C1(CCc2ccc(Cl)cc2)CO1	CAS:66346-01-8	CC(C)(C)C(=O)CCc1ccc(Cl)cc1	[*:1]C.[*:2]C.[*:3]CCc1ccc(Cl)cc1	[*:1]C([*:2])(C)C1([*:3])CO1>>[*:3]C(=O)C([*:1])([*:2])C	0.25	no
310	CAS:58-72-0	C(=C(c1ccccc1)c1ccccc1)c1ccccc1	CAS:900-95-8	CC(=O)O[Sn](c1ccccc1)(c1ccccc1)c1ccccc1	[*:1]c1ccccc1.[*:2]c1ccccc1.[*:3]c1ccccc1	[*:1]C=C([*:2])[*:3]>>[*:1][Sn]([*:2])([*:3])OC(C)=O	0.25	no
311	CAS:18854-01-8	CCOP(=S)(OCC)Oc1cc(-c2ccccc2)on1	CAS:24017-47-8	CCOP(=S)(OCC)Oc1ncn(-c2ccccc2)n1	[*:1]OP(=S)(OCC)OCC.[*:2]c1ccccc1	[*:1]c1cc([*:2])on1>>[*:1]c1ncn([*:2])n1	0.25	no
312	CAS:55719-85-2	C/C=C(\C)C(=O)OCCc1ccccc1	CAS:103-52-6	CCCC(=O)OCCc1ccccc1	[*:1]C(=O)OCCc1ccccc1	[*:1]/C(C)=C/C>>[*:1]CCC	0.24	no
313	CAS:102-16-9	O=C(Cc1ccccc1)OCc1ccccc1	CAS:104-66-5	c1ccc(OCCOc2ccccc2)cc1	[*:1]c1ccccc1.[*:2]c1ccccc1	[*:1]COC(=O)C[*:2]>>[*:1]OCCO[*:2]	0.24	no
314	CAS:103-41-3	O=C(C=Cc1ccccc1)OCc1ccccc1	CAS:104-66-5	c1ccc(OCCOc2ccccc2)cc1	[*:1]c1ccccc1.[*:2]c1ccccc1	[*:1]C=CC(=O)OC[*:2]>>[*:1]OCCO[*:2]	0.24	no
315	CAS:122008-85-9	CCCCOC(=O)[CH](C)Oc1ccc(Oc2ccc(C#N)cc2F)cc1	CAS:69806-50-4	CCCCOC(=O)C(C)Oc1ccc(Oc2ccc(C(F)(F)F)cn2)cc1	[*:2]F.[*:1]Oc1ccc(OC(C)C(=O)OCCCC)cc1	[*:1]c1ccc(C#N)cc1[*:2]>>[*:1]c1ccc(C([*:2])(F)F)cn1	0.23	no
316	CAS:2104-96-3	COP(=S)(OC)Oc1cc(Cl)c(Br)cc1Cl	CAS:18181-70-9	COP(=S)(OC)Oc1cc(Cl)c(I)cc1Cl	[*:1]c1cc(Cl)c(OP(=S)(OC)OC)cc1Cl	[*:1]Br>>[*:1]I	0.23	no
317	CAS:103-41-3	O=C(C=Cc1ccccc1)OCc1ccccc1	CAS:103-29-7	c1ccc(CCc2ccccc2)cc1	[*:1]c1ccccc1.[*:2]c1ccccc1	[*:1]C=CC(=O)OC[*:2]>>[*:1]CC[*:2]	0.23	no
318	CAS:103-29-7	c1ccc(CCc2ccccc2)cc1	CAS:102-16-9	O=C(Cc1ccccc1)OCc1ccccc1	[*:1]c1ccccc1.[*:2]c1ccccc1	[*:1]CC[*:2]>>[*:1]COC(=O)C[*:2]	0.23	no
319	CAS:28434-01-7	CC(C)=C[CH]1[CH](C(=O)OCc2coc(Cc3ccccc3)c2)C1(C)C	CAS:10453-86-8	CC(C)=CC1C(C(=O)OCc2coc(Cc3ccccc3)c2)C1(C)C	[*:2]C.[*:1]C(=O)OCc1coc(Cc2ccccc2)c1	[*:1]C1C(C=C(C)C)C1([*:2])C>>[*:1]C1C(C=C(C)C)[C@@]1([*:2])C	0.23	no
320	CAS:10453-86-8	CC(C)=CC1C(C(=O)OCc2coc(Cc3ccccc3)c2)C1(C)C	CAS:28434-01-7	CC(C)=C[CH]1[CH](C(=O)OCc2coc(Cc3ccccc3)c2)C1(C)C	[*:1]C.[*:2]C(=O)OCc1coc(Cc2ccccc2)c1	[*:1]C(C)=CC1C([*:2])C1(C)C>>[*:2]C1C(C=C(C)C)[C@@]1([*:1])C	0.23	no
321	CAS:10453-86-8	CC(C)=CC1C(C(=O)OCc2coc(Cc3ccccc3)c2)C1(C)C	CAS:28434-01-7	CC(C)=C[CH]1[CH](C(=O)OCc2coc(Cc3ccccc3)c2)C1(C)C	[*:3]C.[*:2]C=C(C)C.[*:1]Cc1coc(Cc2ccccc2)c1	[*:1]OC(=O)C1C([*:2])C1([*:3])C>>[*:1]OC(=O)C1C([*:2])[C@]1([*:3])C	0.23	no
322	CAS:28434-01-7	CC(C)=C[CH]1[CH](C(=O)OCc2coc(Cc3ccccc3)c2)C1(C)C	CAS:10453-86-8	CC(C)=CC1C(C(=O)OCc2coc(Cc3ccccc3)c2)C1(C)C	[*:1]C.[*:2]C(=O)OCc1coc(Cc2ccccc2)c1	[*:1]C(C)=CC1C([*:2])C1(C)C>>[*:2]C1C(C=C(C)C)C1([*:1])C	0.23	no
323	CAS:10453-86-8	CC(C)=CC1C(C(=O)OCc2coc(Cc3ccccc3)c2)C1(C)C	CAS:28434-01-7	CC(C)=C[CH]1[CH](C(=O)OCc2coc(Cc3ccccc3)c2)C1(C)C	[*:2]C.[*:1]C(=O)OCc1coc(Cc2ccccc2)c1	[*:1]C1C(C=C(C)C)C1([*:2])C>>[*:1]C1C(C=C(C)C)[C@]1([*:2])C	0.23	no
324	CAS:28434-01-7	CC(C)=C[CH]1[CH](C(=O)OCc2coc(Cc3ccccc3)c2)C1(C)C	CAS:10453-86-8	CC(C)=CC1C(C(=O)OCc2coc(Cc3ccccc3)c2)C1(C)C	[*:1]C.[*:2]C(=O)OCc1coc(Cc2ccccc2)c1	[*:1]C(C)=CC1C([*:2])C1(C)C>>[*:2]C1C(C=C(C)C)[C@]1([*:1])C	0.23	no
325	CAS:10453-86-8	CC(C)=CC1C(C(=O)OCc2coc(Cc3ccccc3)c2)C1(C)C	CAS:28434-01-7	CC(C)=C[CH]1[CH](C(=O)OCc2coc(Cc3ccccc3)c2)C1(C)C	[*:1]C.[*:2]C.[*:3]C(=O)OCc1coc(Cc2ccccc2)c1	[*:1]C([*:2])=CC1C([*:3])C1(C)C>>[*:3]C1C(C=C(C)C)C1([*:1])[*:2]	0.23	no
326	CAS:28434-01-7	CC(C)=C[CH]1[CH](C(=O)OCc2coc(Cc3ccccc3)c2)C1(C)C	CAS:10453-86-8	CC(C)=CC1C(C(=O)OCc2coc(Cc3ccccc3)c2)C1(C)C	[*:3]C.[*:2]C=C(C)C.[*:1]c1coc(Cc2ccccc2)c1	[*:1]COC(=O)C1C([*:2])C1([*:3])C>>[*:1]COC(=O)C1C([*:2])[C@]1([*:3])C	0.23	no
327	CAS:10453-86-8	CC(C)=CC1C(C(=O)OCc2coc(Cc3ccccc3)c2)C1(C)C	CAS:28434-01-7	CC(C)=C[CH]1[CH](C(=O)OCc2coc(Cc3ccccc3)c2)C1(C)C	[*:3]C.[*:2]C=C(C)C.[*:1]c1coc(Cc2ccccc2)c1	[*:1]COC(=O)C1C([*:2])C1([*:3])C>>[*:1]COC(=O)C1C([*:2])[C@@]1([*:3])C	0.23	no
328	CAS:28434-01-7	CC(C)=C[CH]1[CH](C(=O)OCc2coc(Cc3ccccc3)c2)C1(C)C	CAS:10453-86-8	CC(C)=CC1C(C(=O)OCc2coc(Cc3ccccc3)c2)C1(C)C	[*:3]C.[*:2]C=C(C)C.[*:1]Cc1coc(Cc2ccccc2)c1	[*:1]OC(=O)C1C([*:2])C1([*:3])C>>[*:1]OC(=O)C1C([*:2])[C@@]1([*:3])C	0.23	no
329	CAS:10453-86-8	CC(C)=CC1C(C(=O)OCc2coc(Cc3ccccc3)c2)C1(C)C	CAS:28434-01-7	CC(C)=C[CH]1[CH](C(=O)OCc2coc(Cc3ccccc3)c2)C1(C)C	[*:1]C.[*:2]C.[*:3]C(=O)OCc1coc(Cc2ccccc2)c1	[*:1]C([*:2])=CC1C([*:3])C1(C)C>>[*:1]C(C)=CC1C([*:3])C1([*:2])C	0.23	no
330	CAS:10453-86-8	CC(C)=CC1C(C(=O)OCc2coc(Cc3ccccc3)c2)C1(C)C	CAS:28434-01-7	CC(C)=C[CH]1[CH](C(=O)OCc2coc(Cc3ccccc3)c2)C1(C)C	[*:1]C.[*:3]C.[*:2]C(=O)OCc1coc(Cc2ccccc2)c1	[*:1]C(C)=CC1C([*:2])[C@@]1([*:3])C>>[*:2]C1C(C=C(C)C)C1([*:1])[*:3]	0.23	no
331	CAS:10453-86-8	CC(C)=CC1C(C(=O)OCc2coc(Cc3ccccc3)c2)C1(C)C	CAS:28434-01-7	CC(C)=C[CH]1[CH](C(=O)OCc2coc(Cc3ccccc3)c2)C1(C)C	[*:1]C.[*:2]C.[*:3]C(=O)OCc1coc(Cc2ccccc2)c1	[*:1]C([*:2])=CC1C([*:3])C1(C)C>>[*:1]C(C)=CC1C([*:3])[C@]1([*:2])C	0.23	no
332	CAS:28434-01-7	CC(C)=C[CH]1[CH](C(=O)OCc2coc(Cc3ccccc3)c2)C1(C)C	CAS:10453-86-8	CC(C)=CC1C(C(=O)OCc2coc(Cc3ccccc3)c2)C1(C)C	[*:1]C.[*:3]C.[*:2]C(=O)OCc1coc(Cc2ccccc2)c1	[*:1]C(C)=CC1C([*:2])C1([*:3])C>>[*:2]C1C(C=C(C)C)C1([*:1])[*:3]	0.23	no
333	CAS:28434-01-7	CC(C)=C[CH]1[CH](C(=O)OCc2coc(Cc3ccccc3)c2)C1(C)C	CAS:10453-86-8	CC(C)=CC1C(C(=O)OCc2coc(Cc3ccccc3)c2)C1(C)C	[*:1]C.[*:3]C.[*:2]C(=O)OCc1coc(Cc2ccccc2)c1	[*:1]C(C)=CC1C([*:2])C1([*:3])C>>[*:1]C(C)=CC1C([*:2])[C@]1([*:3])C	0.23	no
334	CAS:10453-86-8	CC(C)=CC1C(C(=O)OCc2coc(Cc3ccccc3)c2)C1(C)C	CAS:28434-01-7	CC(C)=C[CH]1[CH](C(=O)OCc2coc(Cc3ccccc3)c2)C1(C)C	[*:1]C.[*:2]C.[*:3]C(=O)OCc1coc(Cc2ccccc2)c1	[*:1]C([*:2])=CC1C([*:3])C1(C)C>>[*:1]C(C)=CC1C([*:3])[C@@]1([*:2])C	0.23	no
335	CAS:28434-01-7	CC(C)=C[CH]1[CH](C(=O)OCc2coc(Cc3ccccc3)c2)C1(C)C	CAS:10453-86-8	CC(C)=CC1C(C(=O)OCc2coc(Cc3ccccc3)c2)C1(C)C	[*:1]C.[*:3]C.[*:2]C(=O)OCc1coc(Cc2ccccc2)c1	[*:1]C(C)=CC1C([*:2])[C@]1([*:3])C>>[*:2]C1C(C=C(C)C)C1([*:1])[*:3]	0.23	no
336	CAS:10453-86-8	CC(C)=CC1C(C(=O)OCc2coc(Cc3ccccc3)c2)C1(C)C	CAS:28434-01-7	CC(C)=C[CH]1[CH](C(=O)OCc2coc(Cc3ccccc3)c2)C1(C)C	[*:1]C.[*:3]C.[*:2]C(=O)OCc1coc(Cc2ccccc2)c1	[*:1]C(C)=CC1C([*:2])C1([*:3])C>>[*:1]C(C)=CC1C([*:2])[C@@]1([*:3])C	0.23	no
337	CAS:538-74-9	c1ccc(CSCc2ccccc2)cc1	CAS:84-15-1	c1ccc(-c2ccccc2-c2ccccc2)cc1	[*:1]c1ccccc1.[*:2]c1ccccc1	[*:1]CSC[*:2]>>[*:1]c1ccccc1[*:2]	0.23	no
338	CAS:65405-77-8	CC/C=C\CCOC(=O)c1ccccc1O	CAS:118-60-5	CCCCC(CC)COC(=O)c1ccccc1O	[*:1]CC.[*:2]OC(=O)c1ccccc1O	[*:1]/C=C/CC[*:2]>>[*:2]CC([*:1])CCCC	0.22	no
339	CAS:1825-21-4	COc1c(Cl)c(Cl)c(Cl)c(Cl)c1Cl	CAS:82-68-8	O=[N+]([O-])c1c(Cl)c(Cl)c(Cl)c(Cl)c1Cl	[*:1]c1c(Cl)c(Cl)c(Cl)c(Cl)c1Cl	[*:1]OC>>[*:1][N+](=O)[O-]	0.22	no
340	CAS:50-28-2	C[C]12CC[CH]3c4ccc(O)cc4CC[CH]3[CH]1CC[CH]2O	CAS:4245-41-4	CC(=O)Oc1ccc2c(c1)CC[CH]1[CH]2CC[C]2(C)[CH](O)CC[CH]12	[*:1]c1ccc2c(c1)CCC1C2CCC2(C)C(O)CCC12	[*:1]O>>[*:1]OC(C)=O	0.22	no
341	CAS:57-91-0	C[C]12CC[CH]3c4ccc(O)cc4CC[CH]3[CH]1CC[CH]2O	CAS:4245-41-4	CC(=O)Oc1ccc2c(c1)CC[CH]1[CH]2CC[C]2(C)[CH](O)CC[CH]12	[*:1]c1ccc2c(c1)CCC1C2CCC2(C)C(O)CCC12	[*:1]O>>[*:1]OC(C)=O	0.22	no
342	CAS:731-27-1	Cc1ccc(N(SC(F)(Cl)Cl)S(=O)(=O)N(C)C)cc1	CAS:1085-98-9	CN(C)S(=O)(=O)N(SC(F)(Cl)Cl)c1ccccc1	[*:1]c1ccc(N(SC(F)(Cl)Cl)S(=O)(=O)N(C)C)cc1	[*:1]C>>[*:1][H]	0.22	no
343	CAS:495-48-7	[O-][N+](=Nc1ccccc1)c1ccccc1	CAS:104-66-5	c1ccc(OCCOc2ccccc2)cc1	[*:1]c1ccccc1.[*:2]c1ccccc1	[*:1]N=[N+]([*:2])[O-]>>[*:1]OCCO[*:2]	0.21	no
344	CAS:82-68-8	O=[N+]([O-])c1c(Cl)c(Cl)c(Cl)c(Cl)c1Cl	CAS:117-18-0	O=[N+]([O-])c1c(Cl)c(Cl)cc(Cl)c1Cl	[*:1]c1c(Cl)c(Cl)c([N+](=O)[O-])c(Cl)c1Cl	[*:1]Cl>>[*:1][H]	0.21	no
345	CAS:68047-06-3	CC/C(=C(\c1ccc(O)cc1)c1ccc(OCCN(C)C)cc1)c1ccccc1	CAS:10540-29-1	CC/C(=C(\c1ccccc1)c1ccc(OCCN(C)C)cc1)c1ccccc1	[*:1]c1ccc(/C(=C(\CC)c2ccccc2)c2ccc(OCCN(C)C)cc2)cc1	[*:1]O>>[*:1][H]	0.21	no
346	CAS:68047-06-3	CC/C(=C(\c1ccc(O)cc1)c1ccc(OCCN(C)C)cc1)c1ccccc1	CAS:10540-29-1	CC/C(=C(\c1ccccc1)c1ccc(OCCN(C)C)cc1)c1ccccc1	[*:1]/C(=C(\CC)c1ccccc1)c1ccc(OCCN(C)C)cc1	[*:1]c1ccc(O)cc1>>[*:1]c1ccccc1	0.21	no
347	CAS:68047-06-3	CC/C(=C(\c1ccc(O)cc1)c1ccc(OCCN(C)C)cc1)c1ccccc1	CAS:10540-29-1	CC/C(=C(\c1ccccc1)c1ccc(OCCN(C)C)cc1)c1ccccc1	[*:1]CC.[*:3]c1ccc(OCCN(C)C)cc1.[*:2]c1ccccc1	[*:1]C([*:2])=C([*:3])c1ccc(O)cc1>>[*:1]C([*:2])=C([*:3])c1ccccc1	0.21	no
348	CAS:68047-06-3	CC/C(=C(\c1ccc(O)cc1)c1ccc(OCCN(C)C)cc1)c1ccccc1	CAS:10540-29-1	CC/C(=C(\c1ccccc1)c1ccc(OCCN(C)C)cc1)c1ccccc1	[*:2]CC.[*:3]c1ccc(OCCN(C)C)cc1.[*:1]c1ccccc1	[*:1]C([*:2])=C([*:3])c1ccc(O)cc1>>[*:1]C([*:3])=C([*:2])c1ccccc1	0.21	no
349	CAS:1210-39-5	O=CC=C(c1ccccc1)c1ccccc1	CAS:58-72-0	C(=C(c1ccccc1)c1ccccc1)c1ccccc1	[*:1]C=C(c1ccccc1)c1ccccc1	[*:1]C=O>>[*:1]c1ccccc1	0.21	no
350	CAS:1825-19-0	CSc1c(Cl)c(Cl)c(Cl)c(Cl)c1Cl	CAS:82-68-8	O=[N+]([O-])c1c(Cl)c(Cl)c(Cl)c(Cl)c1Cl	[*:1]c1c(Cl)c(Cl)c(Cl)c(Cl)c1Cl	[*:1]SC>>[*:1][N+](=O)[O-]	0.21	no
351	CAS:603-50-9	CC(=O)Oc1ccc(C(c2ccc(OC(C)=O)cc2)c2ccccn2)cc1	CAS:115-33-3	CC(=O)Oc1ccc(C2(c3ccc(OC(C)=O)cc3)C(=O)Nc3ccccc32)cc1	[*:1]c1ccc(OC(C)=O)cc1.[*:2]c1ccc(OC(C)=O)cc1	[*:1]C([*:2])c1ccccn1>>[*:1]C1([*:2])C(=O)Nc2ccccc21	0.2	no
352	CAS:495-48-7	[O-][N+](=Nc1ccccc1)c1ccccc1	CAS:139-66-2	c1ccc(Sc2ccccc2)cc1	[*:1]c1ccccc1.[*:2]c1ccccc1	[*:1]N=[N+]([*:2])[O-]>>[*:1]S[*:2]	0.2	no
353	CAS:94-47-3	O=C(OCCc1ccccc1)c1ccccc1	CAS:84-15-1	c1ccc(-c2ccccc2-c2ccccc2)cc1	[*:1]c1ccccc1.[*:2]c1ccccc1	[*:1]CCOC([*:2])=O>>[*:1]c1ccccc1[*:2]	0.2	no
354	CAS:103-33-3	c1ccc(N=Nc2ccccc2)cc1	CAS:102-09-0	O=C(Oc1ccccc1)Oc1ccccc1	[*:1]c1ccccc1.[*:2]c1ccccc1	[*:1]N=N[*:2]>>[*:1]OC(=O)O[*:2]	0.2	no
355	CAS:58-72-0	C(=C(c1ccccc1)c1ccccc1)c1ccccc1	CAS:1162-06-7	CC(=O)O[Pb](c1ccccc1)(c1ccccc1)c1ccccc1	[*:1]c1ccccc1.[*:2]c1ccccc1.[*:3]c1ccccc1	[*:1]C=C([*:2])[*:3]>>[*:1][Pb]([*:2])([*:3])OC(C)=O	0.2	no
356	CAS:58769-20-3	CC1(C)[CH](/C=C2\CCSC2=O)[CH]1C(=O)OCc1coc(Cc2ccccc2)c1	CAS:28434-01-7	CC(C)=C[CH]1[CH](C(=O)OCc2coc(Cc3ccccc3)c2)C1(C)C	[*:1]C1C(C(=O)OCc2coc(Cc3ccccc3)c2)C1(C)C	[*:1]/C=C1/CCSC1=O>>[*:1]C=C(C)C	0.2	no
357	CAS:65405-77-8	CC/C=C\CCOC(=O)c1ccccc1O	CAS:25152-85-6	CC/C=C\CCOC(=O)c1ccccc1	[*:1]c1ccccc1C(=O)OCC/C=C\CC	[*:1]O>>[*:1][H]	0.2	no
358	CAS:86-29-3	N#CC(c1ccccc1)c1ccccc1	CAS:102-09-0	O=C(Oc1ccccc1)Oc1ccccc1	[*:1]c1ccccc1.[*:2]c1ccccc1	[*:1]C([*:2])C#N>>[*:1]OC(=O)O[*:2]	0.19	no
359	CAS:778-22-3	CC(C)(c1ccccc1)c1ccccc1	CAS:102-09-0	O=C(Oc1ccccc1)Oc1ccccc1	[*:1]c1ccccc1.[*:2]c1ccccc1	[*:1]C([*:2])(C)C>>[*:1]OC(=O)O[*:2]	0.19	no
360	CAS:103-29-7	c1ccc(CCc2ccccc2)cc1	CAS:538-74-9	c1ccc(CSCc2ccccc2)cc1	[*:1]c1ccccc1.[*:2]c1ccccc1	[*:1]CC[*:2]>>[*:1]CSC[*:2]	0.19	no
361	CAS:645-49-8	C(=C\c1ccccc1)\c1ccccc1	CAS:84-15-1	c1ccc(-c2ccccc2-c2ccccc2)cc1	[*:1]c1ccccc1.[*:2]c1ccccc1	[*:1]/C=C\[*:2]>>[*:1]c1ccccc1[*:2]	0.19	no
362	CAS:134-85-0	O=C(c1ccccc1)c1ccc(Cl)cc1	CAS:7005-72-3	Clc1ccc(Oc2ccccc2)cc1	[*:1]c1ccc(Cl)cc1.[*:2]c1ccccc1	[*:1]C([*:2])=O>>[*:1]O[*:2]	0.19	no
363	CAS:102-16-9	O=C(Cc1ccccc1)OCc1ccccc1	CAS:84-15-1	c1ccc(-c2ccccc2-c2ccccc2)cc1	[*:1]c1ccccc1.[*:2]c1ccccc1	[*:1]COC(=O)C[*:2]>>[*:1]c1ccccc1[*:2]	0.19	no
364	CAS:1210-39-5	O=CC=C(c1ccccc1)c1ccccc1	CAS:103-41-3	O=C(C=Cc1ccccc1)OCc1ccccc1	[*:1]c1ccccc1.[*:2]c1ccccc1	[*:1]C([*:2])=CC=O>>[*:1]C=CC(=O)OC[*:2]	0.19	no
365	CAS:103-41-3	O=C(C=Cc1ccccc1)OCc1ccccc1	CAS:84-15-1	c1ccc(-c2ccccc2-c2ccccc2)cc1	[*:1]c1ccccc1.[*:2]c1ccccc1	[*:1]C=CC(=O)OC[*:2]>>[*:1]c1ccccc1[*:2]	0.19	no
366	CAS:451-40-1	O=C(Cc1ccccc1)c1ccccc1	CAS:102-09-0	O=C(Oc1ccccc1)Oc1ccccc1	[*:1]c1ccccc1.[*:2]c1ccccc1	[*:1]CC([*:2])=O>>[*:1]OC(=O)O[*:2]	0.19	no
367	CAS:1210-39-5	O=CC=C(c1ccccc1)c1ccccc1	CAS:102-16-9	O=C(Cc1ccccc1)OCc1ccccc1	[*:1]c1ccccc1.[*:2]c1ccccc1	[*:1]C([*:2])=CC=O>>[*:1]COC(=O)C[*:2]	0.19	no
368	CAS:5588-33-0	CN1CCCCC1CCN1c2ccccc2Sc2ccc(S(C)=O)cc21	CAS:50-52-2	CSc1ccc2c(c1)N(CCC1CCCCN1C)c1ccccc1S2	[*:1]C.[*:2]c1ccc2c(c1)N(CCC1CCCCN1C)c1ccccc1S2	[*:1]S([*:2])=O>>[*:1]S[*:2]	0.19	no
369	CAS:5588-33-0	CN1CCCCC1CCN1c2ccccc2Sc2ccc(S(C)=O)cc21	CAS:50-52-2	CSc1ccc2c(c1)N(CCC1CCCCN1C)c1ccccc1S2	[*:1]c1ccc2c(c1)N(CCC1CCCCN1C)c1ccccc1S2	[*:1]S(C)=O>>[*:1]SC	0.19	no
370	CAS:90-98-2	O=C(c1ccc(Cl)cc1)c1ccc(Cl)cc1	CAS:72-54-8	Clc1ccc(C(c2ccc(Cl)cc2)C(Cl)Cl)cc1	[*:1]c1ccc(Cl)cc1.[*:2]c1ccc(Cl)cc1	[*:1]C([*:2])=O>>[*:1]C([*:2])C(Cl)Cl	0.18	no
371	CAS:92-59-1	CCN(Cc1ccccc1)c1ccccc1	CAS:139-66-2	c1ccc(Sc2ccccc2)cc1	[*:1]c1ccccc1.[*:2]c1ccccc1	[*:1]CN([*:2])CC>>[*:1]S[*:2]	0.18	no
372	CAS:24817-51-4	CCC(C)C(=O)OCCc1ccccc1	CAS:6290-37-5	CCCCCC(=O)OCCc1ccccc1	[*:1]C(=O)OCCc1ccccc1	[*:1]C(C)CC>>[*:1]CCCCC	0.18	no
373	CAS:321-60-8	Fc1ccccc1-c1ccccc1	CAS:90-41-5	Nc1ccccc1-c1ccccc1	[*:1]c1ccccc1-c1ccccc1	[*:1]F>>[*:1]N	0.17	no
374	CAS:495-48-7	[O-][N+](=Nc1ccccc1)c1ccccc1	CAS:92-06-8	c1ccc(-c2cccc(-c3ccccc3)c2)cc1	[*:1]c1ccccc1.[*:2]c1ccccc1	[*:1]N=[N+]([*:2])[O-]>>[*:1]c1cccc([*:2])c1	0.17	no
375	CAS:4938-72-1	CC(C)COC(=O)COc1cc(Cl)c(Cl)cc1Cl	CAS:1928-47-8	CCCCC(CC)COC(=O)COc1cc(Cl)c(Cl)cc1Cl	[*:1]COC(=O)COc1cc(Cl)c(Cl)cc1Cl	[*:1]C(C)C>>[*:1]C(CC)CCCC	0.17	no
376	CAS:122-67-8	CC(C)COC(=O)C=Cc1ccccc1	CAS:103-41-3	O=C(C=Cc1ccccc1)OCc1ccccc1	[*:1]COC(=O)C=Cc1ccccc1	[*:1]C(C)C>>[*:1]c1ccccc1	0.17	no
377	CAS:55283-68-6	C=C(C)CN(CC)c1c([N+](=O)[O-])cc(C(F)(F)F)cc1[N+](=O)[O-]	CAS:62924-70-3	CCN(Cc1c(F)cccc1Cl)c1c([N+](=O)[O-])cc(C(F)(F)F)cc1[N+](=O)[O-]	[*:1]N(CC)c1c([N+](=O)[O-])cc(C(F)(F)F)cc1[N+](=O)[O-]	[*:1]CC(=C)C>>[*:1]Cc1c(F)cccc1Cl	0.16	no
378	CAS:55283-68-6	C=C(C)CN(CC)c1c([N+](=O)[O-])cc(C(F)(F)F)cc1[N+](=O)[O-]	CAS:62924-70-3	CCN(Cc1c(F)cccc1Cl)c1c([N+](=O)[O-])cc(C(F)(F)F)cc1[N+](=O)[O-]	[*:1]CN(CC)c1c([N+](=O)[O-])cc(C(F)(F)F)cc1[N+](=O)[O-]	[*:1]C(=C)C>>[*:1]c1c(F)cccc1Cl	0.16	no
379	CAS:102-09-0	O=C(Oc1ccccc1)Oc1ccccc1	CAS:92-06-8	c1ccc(-c2cccc(-c3ccccc3)c2)cc1	[*:1]c1ccccc1.[*:2]c1ccccc1	[*:1]OC(=O)O[*:2]>>[*:1]c1cccc([*:2])c1	0.16	no
380	CAS:60348-60-9	Brc1ccc(Oc2cc(Br)c(Br)cc2Br)c(Br)c1	CAS:5436-43-1	Brc1ccc(Oc2ccc(Br)cc2Br)c(Br)c1	[*:1]c1cc(Oc2ccc(Br)cc2Br)c(Br)cc1Br	[*:1]Br>>[*:1][H]	0.16	no
381	CAS:5444-75-7	CCCCC(CC)COC(=O)c1ccccc1	CAS:6789-88-4	CCCCCCOC(=O)c1ccccc1	[*:1]C(CCCC)COC(=O)c1ccccc1	[*:1]CC>>[*:1][H]	0.16	no
382	CAS:90-98-2	O=C(c1ccc(Cl)cc1)c1ccc(Cl)cc1	CAS:80-33-1	O=S(=O)(Oc1ccc(Cl)cc1)c1ccc(Cl)cc1	[*:1]c1ccc(Cl)cc1.[*:2]c1ccc(Cl)cc1	[*:1]C([*:2])=O>>[*:1]OS([*:2])(=O)=O	0.16	no
383	CAS:94-47-3	O=C(OCCc1ccccc1)c1ccccc1	CAS:104-66-5	c1ccc(OCCOc2ccccc2)cc1	[*:1]c1ccccc1.[*:2]c1ccccc1	[*:1]CCOC([*:2])=O>>[*:1]OCCO[*:2]	0.16	no
384	CAS:102-20-5	O=C(Cc1ccccc1)OCCc1ccccc1	CAS:882-33-7	c1ccc(SSc2ccccc2)cc1	[*:1]c1ccccc1.[*:2]c1ccccc1	[*:1]CCOC(=O)C[*:2]>>[*:1]SS[*:2]	0.16	no
385	CAS:1210-39-5	O=CC=C(c1ccccc1)c1ccccc1	CAS:538-74-9	c1ccc(CSCc2ccccc2)cc1	[*:1]c1ccccc1.[*:2]c1ccccc1	[*:1]C([*:2])=CC=O>>[*:1]CSC[*:2]	0.15	no
386	CAS:103-41-3	O=C(C=Cc1ccccc1)OCc1ccccc1	CAS:122-69-0	O=C(C=Cc1ccccc1)OCC=Cc1ccccc1	[*:2]OC(=O)C=Cc1ccccc1.[*:1]c1ccccc1	[*:1]C[*:2]>>[*:1]C=CC[*:2]	0.15	no
387	CAS:122-69-0	O=C(C=Cc1ccccc1)OCC=Cc1ccccc1	CAS:103-41-3	O=C(C=Cc1ccccc1)OCc1ccccc1	[*:2]C=Cc1ccccc1.[*:1]c1ccccc1	[*:1]C=CCOC([*:2])=O>>[*:1]COC([*:2])=O	0.15	no
388	CAS:122-69-0	O=C(C=Cc1ccccc1)OCC=Cc1ccccc1	CAS:103-41-3	O=C(C=Cc1ccccc1)OCc1ccccc1	[*:2]C=Cc1ccccc1.[*:1]c1ccccc1	[*:1]C=CC(=O)OC[*:2]>>[*:1]COC([*:2])=O	0.15	no
389	CAS:538-74-9	c1ccc(CSCc2ccccc2)cc1	CAS:102-09-0	O=C(Oc1ccccc1)Oc1ccccc1	[*:1]c1ccccc1.[*:2]c1ccccc1	[*:1]CSC[*:2]>>[*:1]OC(=O)O[*:2]	0.15	no
390	CAS:87-29-6	Nc1ccccc1C(=O)OCC=Cc1ccccc1	CAS:4273-98-7	Nc1ccccc1S(=O)(=O)c1ccccc1	[*:1]c1ccccc1.[*:2]c1ccccc1N	[*:1]C=CCOC([*:2])=O>>[*:1]S([*:2])(=O)=O	0.15	no
391	CAS:645-49-8	C(=C\c1ccccc1)\c1ccccc1	CAS:104-66-5	c1ccc(OCCOc2ccccc2)cc1	[*:1]c1ccccc1.[*:2]c1ccccc1	[*:1]/C=C\[*:2]>>[*:1]OCCO[*:2]	0.15	no
392	CAS:1210-39-5	O=CC=C(c1ccccc1)c1ccccc1	CAS:102-20-5	O=C(Cc1ccccc1)OCCc1ccccc1	[*:1]c1ccccc1.[*:2]c1ccccc1	[*:1]C([*:2])=CC=O>>[*:1]CCOC(=O)C[*:2]	0.15	no
393	CAS:67375-30-8	CC1(C)[CH](C=C(Cl)Cl)[CH]1C(=O)O[CH](C#N)c1cccc(Oc2ccccc2)c1	CAS:52645-53-1	CC1(C)C(C=C(Cl)Cl)C1C(=O)OCc1cccc(Oc2ccccc2)c1	[*:1]OC(=O)C1C(C=C(Cl)Cl)C1(C)C.[*:2]c1cccc(Oc2ccccc2)c1	[*:1]C([*:2])C#N>>[*:1]C[*:2]	0.15	no
394	CAS:67375-30-8	CC1(C)[CH](C=C(Cl)Cl)[CH]1C(=O)O[CH](C#N)c1cccc(Oc2ccccc2)c1	CAS:52645-53-1	CC1(C)C(C=C(Cl)Cl)C1C(=O)OCc1cccc(Oc2ccccc2)c1	[*:1]C(OC(=O)C1C(C=C(Cl)Cl)C1(C)C)c1cccc(Oc2ccccc2)c1	[*:1]C#N>>[*:1][H]	0.15	no
395	CAS:52645-53-1	CC1(C)C(C=C(Cl)Cl)C1C(=O)OCc1cccc(Oc2ccccc2)c1	CAS:67375-30-8	CC1(C)[CH](C=C(Cl)Cl)[CH]1C(=O)O[CH](C#N)c1cccc(Oc2ccccc2)c1	[*:1]OC(=O)C1C(C=C(Cl)Cl)C1(C)C.[*:2]Oc1ccccc1	[*:1]Cc1cccc([*:2])c1>>[*:2]c1cccc(C([*:1])C#N)c1	0.15	no
396	CAS:67375-30-8	CC1(C)[CH](C=C(Cl)Cl)[CH]1C(=O)O[CH](C#N)c1cccc(Oc2ccccc2)c1	CAS:52645-53-1	CC1(C)C(C=C(Cl)Cl)C1C(=O)OCc1cccc(Oc2ccccc2)c1	[*:1]C1C(C=C(Cl)Cl)C1(C)C.[*:2]c1cccc(Oc2ccccc2)c1	[*:1]C(=O)OC([*:2])C#N>>[*:2]COC([*:1])=O	0.15	no
397	CAS:451-40-1	O=C(Cc1ccccc1)c1ccccc1	CAS:495-48-7	[O-][N+](=Nc1ccccc1)c1ccccc1	[*:1]c1ccccc1.[*:2]c1ccccc1	[*:1]CC([*:2])=O>>[*:1]N=[N+]([*:2])[O-]	0.15	no
398	CAS:39515-41-8	CC1(C)C(C(=O)OC(C#N)c2cccc(Oc3ccccc3)c2)C1(C)C	CAS:67375-30-8	CC1(C)[CH](C=C(Cl)Cl)[CH]1C(=O)O[CH](C#N)c1cccc(Oc2ccccc2)c1	[*:2]C.[*:1]C(=O)OC(C#N)c1cccc(Oc2ccccc2)c1	[*:1]C1C(C)(C)[C@@]1([*:2])C>>[*:1]C1C(C=C(Cl)Cl)C1([*:2])C	0.15	no
399	CAS:39515-41-8	CC1(C)C(C(=O)OC(C#N)c2cccc(Oc3ccccc3)c2)C1(C)C	CAS:67375-30-8	CC1(C)[CH](C=C(Cl)Cl)[CH]1C(=O)O[CH](C#N)c1cccc(Oc2ccccc2)c1	[*:2]C.[*:1]C(=O)OC(C#N)c1cccc(Oc2ccccc2)c1	[*:1]C1C(C)(C)[C@]1([*:2])C>>[*:1]C1C(C=C(Cl)Cl)C1([*:2])C	0.15	no
400	CAS:39515-41-8	CC1(C)C(C(=O)OC(C#N)c2cccc(Oc3ccccc3)c2)C1(C)C	CAS:67375-30-8	CC1(C)[CH](C=C(Cl)Cl)[CH]1C(=O)O[CH](C#N)c1cccc(Oc2ccccc2)c1	[*:2]C.[*:1]C(=O)OC(C#N)c1cccc(Oc2ccccc2)c1	[*:1]C1C([*:2])(C)C1(C)C>>[*:1]C1C(C=C(Cl)Cl)[C@@]1([*:2])C	0.15	no
401	CAS:39515-41-8	CC1(C)C(C(=O)OC(C#N)c2cccc(Oc3ccccc3)c2)C1(C)C	CAS:67375-30-8	CC1(C)[CH](C=C(Cl)Cl)[CH]1C(=O)O[CH](C#N)c1cccc(Oc2ccccc2)c1	[*:2]C.[*:3]C.[*:1]C(=O)OC(C#N)c1cccc(Oc2ccccc2)c1	[*:1]C1C([*:2])([*:3])C1(C)C>>[*:1]C1C(C=C(Cl)Cl)C1([*:2])[*:3]	0.15	no
402	CAS:39515-41-8	CC1(C)C(C(=O)OC(C#N)c2cccc(Oc3ccccc3)c2)C1(C)C	CAS:67375-30-8	CC1(C)[CH](C=C(Cl)Cl)[CH]1C(=O)O[CH](C#N)c1cccc(Oc2ccccc2)c1	[*:2]C.[*:3]C.[*:1]C(=O)OC(C#N)c1cccc(Oc2ccccc2)c1	[*:1]C1C([*:2])(C)C1([*:3])C>>[*:1]C1C(C=C(Cl)Cl)C1([*:2])[*:3]	0.15	no
403	CAS:67375-30-8	CC1(C)[CH](C=C(Cl)Cl)[CH]1C(=O)O[CH](C#N)c1cccc(Oc2ccccc2)c1	CAS:39515-41-8	CC1(C)C(C(=O)OC(C#N)c2cccc(Oc3ccccc3)c2)C1(C)C	[*:2]C.[*:3]C.[*:1]C(=O)OC(C#N)c1cccc(Oc2ccccc2)c1	[*:1]C1C(C=C(Cl)Cl)C1([*:2])[*:3]>>[*:1][C@@H]1C([*:2])([*:3])C1(C)C	0.15	no
404	CAS:67375-30-8	CC1(C)[CH](C=C(Cl)Cl)[CH]1C(=O)O[CH](C#N)c1cccc(Oc2ccccc2)c1	CAS:39515-41-8	CC1(C)C(C(=O)OC(C#N)c2cccc(Oc3ccccc3)c2)C1(C)C	[*:2]C.[*:1]C(=O)OC(C#N)c1cccc(Oc2ccccc2)c1	[*:1]C1C(C=C(Cl)Cl)C1([*:2])C>>[*:1][C@@H]1C([*:2])(C)C1(C)C	0.15	no
405	CAS:39515-41-8	CC1(C)C(C(=O)OC(C#N)c2cccc(Oc3ccccc3)c2)C1(C)C	CAS:67375-30-8	CC1(C)[CH](C=C(Cl)Cl)[CH]1C(=O)O[CH](C#N)c1cccc(Oc2ccccc2)c1	[*:2]C.[*:1]C(=O)OC(C#N)c1cccc(Oc2ccccc2)c1	[*:1]C1C([*:2])(C)C1(C)C>>[*:1]C1C(C=C(Cl)Cl)C1([*:2])C	0.15	no
406	CAS:39515-41-8	CC1(C)C(C(=O)OC(C#N)c2cccc(Oc3ccccc3)c2)C1(C)C	CAS:67375-30-8	CC1(C)[CH](C=C(Cl)Cl)[CH]1C(=O)O[CH](C#N)c1cccc(Oc2ccccc2)c1	[*:2]C.[*:1]C(=O)OC(C#N)c1cccc(Oc2ccccc2)c1	[*:1]C1C([*:2])(C)C1(C)C>>[*:1]C1C(C=C(Cl)Cl)[C@]1([*:2])C	0.15	no
407	CAS:67375-30-8	CC1(C)[CH](C=C(Cl)Cl)[CH]1C(=O)O[CH](C#N)c1cccc(Oc2ccccc2)c1	CAS:39515-41-8	CC1(C)C(C(=O)OC(C#N)c2cccc(Oc3ccccc3)c2)C1(C)C	[*:2]C.[*:3]C.[*:1]C(=O)OC(C#N)c1cccc(Oc2ccccc2)c1	[*:1]C1C(C=C(Cl)Cl)C1([*:2])[*:3]>>[*:1][C@H]1C([*:2])([*:3])C1(C)C	0.15	no
408	CAS:39515-41-8	CC1(C)C(C(=O)OC(C#N)c2cccc(Oc3ccccc3)c2)C1(C)C	CAS:67375-30-8	CC1(C)[CH](C=C(Cl)Cl)[CH]1C(=O)O[CH](C#N)c1cccc(Oc2ccccc2)c1	[*:2]C.[*:3]C.[*:1]C(=O)OC(C#N)c1cccc(Oc2ccccc2)c1	[*:1]C1C([*:2])(C)[C@@]1([*:3])C>>[*:1]C1C(C=C(Cl)Cl)C1([*:2])[*:3]	0.15	no
409	CAS:39515-41-8	CC1(C)C(C(=O)OC(C#N)c2cccc(Oc3ccccc3)c2)C1(C)C	CAS:67375-30-8	CC1(C)[CH](C=C(Cl)Cl)[CH]1C(=O)O[CH](C#N)c1cccc(Oc2ccccc2)c1	[*:1]C(=O)OC(C#N)c1cccc(Oc2ccccc2)c1	[*:1]C1C(C)(C)C1(C)C>>[*:1]C1C(C=C(Cl)Cl)C1(C)C	0.15	no
410	CAS:39515-41-8	CC1(C)C(C(=O)OC(C#N)c2cccc(Oc3ccccc3)c2)C1(C)C	CAS:67375-30-8	CC1(C)[CH](C=C(Cl)Cl)[CH]1C(=O)O[CH](C#N)c1cccc(Oc2ccccc2)c1	[*:2]C.[*:3]C.[*:1]C(=O)OC(C#N)c1cccc(Oc2ccccc2)c1	[*:1]C1C([*:2])(C)[C@]1([*:3])C>>[*:1]C1C(C=C(Cl)Cl)C1([*:2])[*:3]	0.15	no
411	CAS:67375-30-8	CC1(C)[CH](C=C(Cl)Cl)[CH]1C(=O)O[CH](C#N)c1cccc(Oc2ccccc2)c1	CAS:39515-41-8	CC1(C)C(C(=O)OC(C#N)c2cccc(Oc3ccccc3)c2)C1(C)C	[*:2]C.[*:1]C(=O)OC(C#N)c1cccc(Oc2ccccc2)c1	[*:1]C1C(C=C(Cl)Cl)C1([*:2])C>>[*:1][C@H]1C([*:2])(C)C1(C)C	0.15	no
412	CAS:94-11-1	CC(C)OC(=O)COc1ccc(Cl)cc1Cl	CID:24678	CC(C)CCCCCOC(=O)COc1ccc(Cl)cc1Cl	[*:2]C.[*:3]C.[*:1]OC(=O)COc1ccc(Cl)cc1Cl	[*:1]C([*:2])[*:3]>>[*:1]CCCCCC([*:2])[*:3]	0.14	no
413	CAS:94-11-1	CC(C)OC(=O)COc1ccc(Cl)cc1Cl	CID:24678	CC(C)CCCCCOC(=O)COc1ccc(Cl)cc1Cl	[*:2]C.[*:1]OC(=O)COc1ccc(Cl)cc1Cl	[*:1]C([*:2])C>>[*:1]CCCCC[C@H]([*:2])C	0.14	no
414	CAS:94-11-1	CC(C)OC(=O)COc1ccc(Cl)cc1Cl	CID:24678	CC(C)CCCCCOC(=O)COc1ccc(Cl)cc1Cl	[*:2]C.[*:1]OC(=O)COc1ccc(Cl)cc1Cl	[*:1]C([*:2])C>>[*:1]CCCCC[C@@H]([*:2])C	0.14	no
415	CAS:94-11-1	CC(C)OC(=O)COc1ccc(Cl)cc1Cl	CID:24678	CC(C)CCCCCOC(=O)COc1ccc(Cl)cc1Cl	[*:2]C.[*:1]OC(=O)COc1ccc(Cl)cc1Cl	[*:1]C([*:2])C>>[*:1]CCCCCC([*:2])C	0.14	no
416	CAS:7779-65-9	CC(C)CCOC(=O)C=Cc1ccccc1	CAS:103-53-7	O=C(C=Cc1ccccc1)OCCc1ccccc1	[*:1]CCOC(=O)C=Cc1ccccc1	[*:1]C(C)C>>[*:1]c1ccccc1	0.14	no
417	CAS:778-22-3	CC(C)(c1ccccc1)c1ccccc1	CAS:495-48-7	[O-][N+](=Nc1ccccc1)c1ccccc1	[*:1]c1ccccc1.[*:2]c1ccccc1	[*:1]C([*:2])(C)C>>[*:1]N=[N+]([*:2])[O-]	0.14	no
418	CAS:90-98-2	O=C(c1ccc(Cl)cc1)c1ccc(Cl)cc1	CAS:80-07-9	O=S(=O)(c1ccc(Cl)cc1)c1ccc(Cl)cc1	[*:1]c1ccc(Cl)cc1.[*:2]c1ccc(Cl)cc1	[*:1]C([*:2])=O>>[*:1]S([*:2])(=O)=O	0.14	no
419	CAS:86-29-3	N#CC(c1ccccc1)c1ccccc1	CAS:495-48-7	[O-][N+](=Nc1ccccc1)c1ccccc1	[*:1]c1ccccc1.[*:2]c1ccccc1	[*:1]C([*:2])C#N>>[*:1]N=[N+]([*:2])[O-]	0.14	no
420	CID:14950	Cc1c(C(=O)O)c(O)cc2c1C(=O)c1c(O)c(C3OC(CO)C(O)C(O)C3O)c(O)c(O)c1C2=O	CAS:1260-17-9	Cc1c(C(=O)O)c(O)cc2c1C(=O)c1c(O)c([CH]3O[CH](CO)[CH](O)[CH](O)[CH]3O)c(O)c(O)c1C2=O	[*:2]O.[*:3]O.[*:1]c1c(O)c(O)c2c(c1O)C(=O)c1c(cc(O)c(C(=O)O)c1C)C2=O	[*:1]C1OC(CO)C([*:2])C(O)C1[*:3]>>[*:1]C1OC(CO)C(O)C([*:2])C1[*:3]	0.14	no
421	CAS:1260-17-9	Cc1c(C(=O)O)c(O)cc2c1C(=O)c1c(O)c([CH]3O[CH](CO)[CH](O)[CH](O)[CH]3O)c(O)c(O)c1C2=O	CID:14950	Cc1c(C(=O)O)c(O)cc2c1C(=O)c1c(O)c(C3OC(CO)C(O)C(O)C3O)c(O)c(O)c1C2=O	[*:2]O.[*:3]O.[*:1]c1c(O)c(O)c2c(c1O)C(=O)c1c(cc(O)c(C(=O)O)c1C)C2=O	[*:1]C1OC(CO)C([*:2])C([*:3])C1O>>[*:1]C1OC(CO)C([*:2])C(O)C1[*:3]	0.14	no
422	CAS:1260-17-9	Cc1c(C(=O)O)c(O)cc2c1C(=O)c1c(O)c([CH]3O[CH](CO)[CH](O)[CH](O)[CH]3O)c(O)c(O)c1C2=O	CID:14950	Cc1c(C(=O)O)c(O)cc2c1C(=O)c1c(O)c(C3OC(CO)C(O)C(O)C3O)c(O)c(O)c1C2=O	[*:2]O.[*:3]O.[*:1]c1c(O)c(O)c2c(c1O)C(=O)c1c(cc(O)c(C(=O)O)c1C)C2=O	[*:1]C1OC(CO)C(O)C([*:2])C1[*:3]>>[*:2]CC1OC([*:1])C([*:3])C(O)C1O	0.14	no
423	CAS:1260-17-9	Cc1c(C(=O)O)c(O)cc2c1C(=O)c1c(O)c([CH]3O[CH](CO)[CH](O)[CH](O)[CH]3O)c(O)c(O)c1C2=O	CID:14950	Cc1c(C(=O)O)c(O)cc2c1C(=O)c1c(O)c(C3OC(CO)C(O)C(O)C3O)c(O)c(O)c1C2=O	[*:2]O.[*:3]O.[*:1]c1c(O)c(O)c2c(c1O)C(=O)c1c(cc(O)c(C(=O)O)c1C)C2=O	[*:1]C1OC(CO)C([*:2])C(O)C1[*:3]>>[*:2]CC1OC([*:1])C([*:3])C(O)C1O	0.14	no
424	CID:14950	Cc1c(C(=O)O)c(O)cc2c1C(=O)c1c(O)c(C3OC(CO)C(O)C(O)C3O)c(O)c(O)c1C2=O	CAS:1260-17-9	Cc1c(C(=O)O)c(O)cc2c1C(=O)c1c(O)c([CH]3O[CH](CO)[CH](O)[CH](O)[CH]3O)c(O)c(O)c1C2=O	[*:2]CO.[*:3]O.[*:1]c1c(O)c(O)c2c(c1O)C(=O)c1c(cc(O)c(C(=O)O)c1C)C2=O	[*:1]C1OC([*:2])C(O)C([*:3])C1O>>[*:1]C1OC([*:2])C(O)C(O)C1[*:3]	0.14	no
425	CID:14950	Cc1c(C(=O)O)c(O)cc2c1C(=O)c1c(O)c(C3OC(CO)C(O)C(O)C3O)c(O)c(O)c1C2=O	CAS:1260-17-9	Cc1c(C(=O)O)c(O)cc2c1C(=O)c1c(O)c([CH]3O[CH](CO)[CH](O)[CH](O)[CH]3O)c(O)c(O)c1C2=O	[*:1]CO.[*:3]O.[*:2]c1c(O)c(O)c2c(c1O)C(=O)c1c(cc(O)c(C(=O)O)c1C)C2=O	[*:1]C1OC([*:2])C(O)C(O)C1[*:3]>>[*:2]C1OC([*:1])C(O)C(O)C1[*:3]	0.14	no
426	CID:14950	Cc1c(C(=O)O)c(O)cc2c1C(=O)c1c(O)c(C3OC(CO)C(O)C(O)C3O)c(O)c(O)c1C2=O	CAS:1260-17-9	Cc1c(C(=O)O)c(O)cc2c1C(=O)c1c(O)c([CH]3O[CH](CO)[CH](O)[CH](O)[CH]3O)c(O)c(O)c1C2=O	[*:2]O.[*:3]O.[*:1]c1c(O)c(O)c2c(c1O)C(=O)c1c(cc(O)c(C(=O)O)c1C)C2=O	[*:1]C1OC(CO)C([*:2])C([*:3])C1O>>[*:1]C1OC(CO)C(O)C([*:2])C1[*:3]	0.14	no
427	CAS:1260-17-9	Cc1c(C(=O)O)c(O)cc2c1C(=O)c1c(O)c([CH]3O[CH](CO)[CH](O)[CH](O)[CH]3O)c(O)c(O)c1C2=O	CID:14950	Cc1c(C(=O)O)c(O)cc2c1C(=O)c1c(O)c(C3OC(CO)C(O)C(O)C3O)c(O)c(O)c1C2=O	[*:2]O.[*:3]O.[*:1]c1c(O)c(O)c2c(c1O)C(=O)c1c(cc(O)c(C(=O)O)c1C)C2=O	[*:1]C1OC(CO)C([*:2])C(O)C1[*:3]>>[*:2]CC1OC([*:1])C(O)C(O)C1[*:3]	0.14	no
428	CAS:1260-17-9	Cc1c(C(=O)O)c(O)cc2c1C(=O)c1c(O)c([CH]3O[CH](CO)[CH](O)[CH](O)[CH]3O)c(O)c(O)c1C2=O	CID:14950	Cc1c(C(=O)O)c(O)cc2c1C(=O)c1c(O)c(C3OC(CO)C(O)C(O)C3O)c(O)c(O)c1C2=O	[*:2]O.[*:3]O.[*:1]c1c(O)c(O)c2c(c1O)C(=O)c1c(cc(O)c(C(=O)O)c1C)C2=O	[*:1]C1OC(CO)C([*:2])C([*:3])C1O>>[*:2]CC1OC([*:1])C([*:3])C(O)C1O	0.14	no
429	CAS:1260-17-9	Cc1c(C(=O)O)c(O)cc2c1C(=O)c1c(O)c([CH]3O[CH](CO)[CH](O)[CH](O)[CH]3O)c(O)c(O)c1C2=O	CID:14950	Cc1c(C(=O)O)c(O)cc2c1C(=O)c1c(O)c(C3OC(CO)C(O)C(O)C3O)c(O)c(O)c1C2=O	[*:2]O.[*:3]O.[*:1]c1c(O)c(O)c2c(c1O)C(=O)c1c(cc(O)c(C(=O)O)c1C)C2=O	[*:1]C1OC(CO)C([*:2])C(O)C1[*:3]>>[*:2]CC1OC([*:1])C(O)C([*:3])C1O	0.14	no
430	CAS:1260-17-9	Cc1c(C(=O)O)c(O)cc2c1C(=O)c1c(O)c([CH]3O[CH](CO)[CH](O)[CH](O)[CH]3O)c(O)c(O)c1C2=O	CID:14950	Cc1c(C(=O)O)c(O)cc2c1C(=O)c1c(O)c(C3OC(CO)C(O)C(O)C3O)c(O)c(O)c1C2=O	[*:2]O.[*:3]O.[*:1]c1c(O)c(O)c2c(c1O)C(=O)c1c(cc(O)c(C(=O)O)c1C)C2=O	[*:1]C1OC(CO)C([*:2])C([*:3])C1O>>[*:2]CC1OC([*:1])C(O)C([*:3])C1O	0.14	no
431	CAS:1260-17-9	Cc1c(C(=O)O)c(O)cc2c1C(=O)c1c(O)c([CH]3O[CH](CO)[CH](O)[CH](O)[CH]3O)c(O)c(O)c1C2=O	CID:14950	Cc1c(C(=O)O)c(O)cc2c1C(=O)c1c(O)c(C3OC(CO)C(O)C(O)C3O)c(O)c(O)c1C2=O	[*:2]O.[*:3]O.[*:1]c1c(O)c(O)c2c(c1O)C(=O)c1c(cc(O)c(C(=O)O)c1C)C2=O	[*:1]C1OC(CO)C([*:2])C([*:3])C1O>>[*:2]CC1OC([*:1])C(O)C(O)C1[*:3]	0.14	no
432	CID:14950	Cc1c(C(=O)O)c(O)cc2c1C(=O)c1c(O)c(C3OC(CO)C(O)C(O)C3O)c(O)c(O)c1C2=O	CAS:1260-17-9	Cc1c(C(=O)O)c(O)cc2c1C(=O)c1c(O)c([CH]3O[CH](CO)[CH](O)[CH](O)[CH]3O)c(O)c(O)c1C2=O	[*:2]O.[*:1]c1c(O)c(O)c2c(c1O)C(=O)c1c(cc(O)c(C(=O)O)c1C)C2=O	[*:1]C1OC(CO)C([*:2])C(O)C1O>>[*:1]C1OC(CO)C(O)C(O)C1[*:2]	0.14	no
433	CID:14950	Cc1c(C(=O)O)c(O)cc2c1C(=O)c1c(O)c(C3OC(CO)C(O)C(O)C3O)c(O)c(O)c1C2=O	CAS:1260-17-9	Cc1c(C(=O)O)c(O)cc2c1C(=O)c1c(O)c([CH]3O[CH](CO)[CH](O)[CH](O)[CH]3O)c(O)c(O)c1C2=O	[*:1]CO.[*:3]O.[*:2]c1c(O)c(O)c2c(c1O)C(=O)c1c(cc(O)c(C(=O)O)c1C)C2=O	[*:1]C1OC([*:2])C(O)C([*:3])C1O>>[*:1]C1OC([*:2])C(O)C(O)C1[*:3]	0.14	no
434	CID:14950	Cc1c(C(=O)O)c(O)cc2c1C(=O)c1c(O)c(C3OC(CO)C(O)C(O)C3O)c(O)c(O)c1C2=O	CAS:1260-17-9	Cc1c(C(=O)O)c(O)cc2c1C(=O)c1c(O)c([CH]3O[CH](CO)[CH](O)[CH](O)[CH]3O)c(O)c(O)c1C2=O	[*:1]O.[*:3]O.[*:2]c1c(O)c(O)c2c(c1O)C(=O)c1c(cc(O)c(C(=O)O)c1C)C2=O	[*:1]CC1OC([*:2])C([*:3])C(O)C1O>>[*:1]CC1OC([*:2])C(O)C(O)C1[*:3]	0.14	no
435	CID:14950	Cc1c(C(=O)O)c(O)cc2c1C(=O)c1c(O)c(C3OC(CO)C(O)C(O)C3O)c(O)c(O)c1C2=O	CAS:1260-17-9	Cc1c(C(=O)O)c(O)cc2c1C(=O)c1c(O)c([CH]3O[CH](CO)[CH](O)[CH](O)[CH]3O)c(O)c(O)c1C2=O	[*:1]O.[*:3]O.[*:2]c1c(O)c(O)c2c(c1O)C(=O)c1c(cc(O)c(C(=O)O)c1C)C2=O	[*:1]CC1OC([*:2])C(O)C([*:3])C1O>>[*:1]CC1OC([*:2])C(O)C(O)C1[*:3]	0.14	no
436	CAS:1260-17-9	Cc1c(C(=O)O)c(O)cc2c1C(=O)c1c(O)c([CH]3O[CH](CO)[CH](O)[CH](O)[CH]3O)c(O)c(O)c1C2=O	CID:14950	Cc1c(C(=O)O)c(O)cc2c1C(=O)c1c(O)c(C3OC(CO)C(O)C(O)C3O)c(O)c(O)c1C2=O	[*:2]O.[*:1]c1c(O)c(O)c2c(c1O)C(=O)c1c(cc(O)c(C(=O)O)c1C)C2=O	[*:1]C1OC(CO)C([*:2])C(O)C1O>>[*:2]CC1OC([*:1])C(O)C(O)C1O	0.14	no
437	CID:14950	Cc1c(C(=O)O)c(O)cc2c1C(=O)c1c(O)c(C3OC(CO)C(O)C(O)C3O)c(O)c(O)c1C2=O	CAS:1260-17-9	Cc1c(C(=O)O)c(O)cc2c1C(=O)c1c(O)c([CH]3O[CH](CO)[CH](O)[CH](O)[CH]3O)c(O)c(O)c1C2=O	[*:2]O.[*:1]c1c(O)c(O)c2c(c1O)C(=O)c1c(cc(O)c(C(=O)O)c1C)C2=O	[*:1]C1OC(CO)C([*:2])C(O)C1O>>[*:1]C1OC(CO)C(O)C([*:2])C1O	0.14	no
438	CAS:1260-17-9	Cc1c(C(=O)O)c(O)cc2c1C(=O)c1c(O)c([CH]3O[CH](CO)[CH](O)[CH](O)[CH]3O)c(O)c(O)c1C2=O	CID:14950	Cc1c(C(=O)O)c(O)cc2c1C(=O)c1c(O)c(C3OC(CO)C(O)C(O)C3O)c(O)c(O)c1C2=O	[*:2]O.[*:1]c1c(O)c(O)c2c(c1O)C(=O)c1c(cc(O)c(C(=O)O)c1C)C2=O	[*:1]C1OC(CO)C(O)C([*:2])C1O>>[*:1]C1OC(CO)C(O)C(O)C1[*:2]	0.14	no
439	CAS:1260-17-9	Cc1c(C(=O)O)c(O)cc2c1C(=O)c1c(O)c([CH]3O[CH](CO)[CH](O)[CH](O)[CH]3O)c(O)c(O)c1C2=O	CID:14950	Cc1c(C(=O)O)c(O)cc2c1C(=O)c1c(O)c(C3OC(CO)C(O)C(O)C3O)c(O)c(O)c1C2=O	[*:2]O.[*:1]c1c(O)c(O)c2c(c1O)C(=O)c1c(cc(O)c(C(=O)O)c1C)C2=O	[*:1]C1OC(CO)C(O)C([*:2])C1O>>[*:2]CC1OC([*:1])C(O)C(O)C1O	0.14	no
440	CAS:1260-17-9	Cc1c(C(=O)O)c(O)cc2c1C(=O)c1c(O)c([CH]3O[CH](CO)[CH](O)[CH](O)[CH]3O)c(O)c(O)c1C2=O	CID:14950	Cc1c(C(=O)O)c(O)cc2c1C(=O)c1c(O)c(C3OC(CO)C(O)C(O)C3O)c(O)c(O)c1C2=O	[*:2]O.[*:1]c1c(O)c(O)c2c(c1O)C(=O)c1c(cc(O)c(C(=O)O)c1C)C2=O	[*:1]C1OC(CO)C(O)C(O)C1[*:2]>>[*:2]CC1OC([*:1])C(O)C(O)C1O	0.14	no
441	CAS:1260-17-9	Cc1c(C(=O)O)c(O)cc2c1C(=O)c1c(O)c([CH]3O[CH](CO)[CH](O)[CH](O)[CH]3O)c(O)c(O)c1C2=O	CID:14950	Cc1c(C(=O)O)c(O)cc2c1C(=O)c1c(O)c(C3OC(CO)C(O)C(O)C3O)c(O)c(O)c1C2=O	[*:2]O.[*:3]O.[*:1]c1c(O)c(O)c2c(c1O)C(=O)c1c(cc(O)c(C(=O)O)c1C)C2=O	[*:1]C1OC(CO)C(O)C([*:2])C1[*:3]>>[*:2]CC1OC([*:1])C(O)C(O)C1[*:3]	0.14	no
442	CAS:1260-17-9	Cc1c(C(=O)O)c(O)cc2c1C(=O)c1c(O)c([CH]3O[CH](CO)[CH](O)[CH](O)[CH]3O)c(O)c(O)c1C2=O	CID:14950	Cc1c(C(=O)O)c(O)cc2c1C(=O)c1c(O)c(C3OC(CO)C(O)C(O)C3O)c(O)c(O)c1C2=O	[*:2]O.[*:3]O.[*:1]c1c(O)c(O)c2c(c1O)C(=O)c1c(cc(O)c(C(=O)O)c1C)C2=O	[*:1]C1OC(CO)C(O)C([*:2])C1[*:3]>>[*:2]CC1OC([*:1])C(O)C([*:3])C1O	0.14	no
443	CAS:1260-17-9	Cc1c(C(=O)O)c(O)cc2c1C(=O)c1c(O)c([CH]3O[CH](CO)[CH](O)[CH](O)[CH]3O)c(O)c(O)c1C2=O	CID:14950	Cc1c(C(=O)O)c(O)cc2c1C(=O)c1c(O)c(C3OC(CO)C(O)C(O)C3O)c(O)c(O)c1C2=O	[*:1]O.[*:3]O.[*:2]c1c(O)c(O)c2c(c1O)C(=O)c1c(cc(O)c(C(=O)O)c1C)C2=O	[*:1]CC1OC([*:2])C([*:3])C(O)C1O>>[*:1]CC1OC([*:2])C(O)C([*:3])C1O	0.14	no
444	CAS:4938-72-1	CC(C)COC(=O)COc1cc(Cl)c(Cl)cc1Cl	CAS:2545-59-7	CCCCOCCOC(=O)COc1cc(Cl)c(Cl)cc1Cl	[*:1]OC(=O)COc1cc(Cl)c(Cl)cc1Cl	[*:1]CC(C)C>>[*:1]CCOCCCC	0.13	no
445	CAS:103-33-3	c1ccc(N=Nc2ccccc2)cc1	CAS:495-48-7	[O-][N+](=Nc1ccccc1)c1ccccc1	[*:1]c1ccccc1.[*:2]c1ccccc1	[*:1]N=N[*:2]>>[*:1]N=[N+]([*:2])[O-]	0.13	no
446	CAS:67564-91-4	CC(Cc1ccc(C(C)(C)C)cc1)CN1C[CH](C)O[CH](C)C1	CAS:78613-35-1	CCC(C)(C)c1ccc(CC(C)CN2C[CH](C)O[CH](C)C2)cc1	[*:1]c1ccc(CC(C)CN2CC(C)OC(C)C2)cc1	[*:1]C(C)(C)C>>[*:1]C(C)(C)CC	0.13	no
447	CAS:67564-91-4	CC(Cc1ccc(C(C)(C)C)cc1)CN1C[CH](C)O[CH](C)C1	CAS:78613-35-1	CCC(C)(C)c1ccc(CC(C)CN2C[CH](C)O[CH](C)C2)cc1	[*:1]C.[*:2]c1ccc(CC(C)CN2CC(C)OC(C)C2)cc1	[*:1]C([*:2])(C)C>>[*:1]C([*:2])(C)CC	0.13	no
448	CAS:67564-91-4	CC(Cc1ccc(C(C)(C)C)cc1)CN1C[CH](C)O[CH](C)C1	CAS:78613-35-1	CCC(C)(C)c1ccc(CC(C)CN2C[CH](C)O[CH](C)C2)cc1	[*:1]C.[*:2]C.[*:3]c1ccc(CC(C)CN2CC(C)OC(C)C2)cc1	[*:1]C([*:2])([*:3])C>>[*:1]C([*:2])([*:3])CC	0.13	no
449	CAS:67564-91-4	CC(Cc1ccc(C(C)(C)C)cc1)CN1C[CH](C)O[CH](C)C1	CAS:78613-35-1	CCC(C)(C)c1ccc(CC(C)CN2C[CH](C)O[CH](C)C2)cc1	[*:1]C(C)(C)c1ccc(CC(C)CN2CC(C)OC(C)C2)cc1	[*:1]C>>[*:1]CC	0.13	no
450	CAS:90-98-2	O=C(c1ccc(Cl)cc1)c1ccc(Cl)cc1	CAS:50-29-3	Clc1ccc(C(c2ccc(Cl)cc2)C(Cl)(Cl)Cl)cc1	[*:1]c1ccc(Cl)cc1.[*:2]c1ccc(Cl)cc1	[*:1]C([*:2])=O>>[*:1]C([*:2])C(Cl)(Cl)Cl	0.13	no
451	CAS:22915-73-7	O=C(OCCCCCCOC(=O)c1ccccc1)c1ccccc1	CAS:120-55-8	O=C(OCCOCCOC(=O)c1ccccc1)c1ccccc1	[*:1]OC(=O)c1ccccc1.[*:2]OC(=O)c1ccccc1	[*:1]CCCCCC[*:2]>>[*:1]CCOCC[*:2]	0.13	no
452	CAS:103-33-3	c1ccc(N=Nc2ccccc2)cc1	CAS:84-15-1	c1ccc(-c2ccccc2-c2ccccc2)cc1	[*:1]c1ccccc1.[*:2]c1ccccc1	[*:1]N=N[*:2]>>[*:1]c1ccccc1[*:2]	0.13	no
453	CAS:369-77-7	O=C(Nc1ccc(Cl)cc1)Nc1ccc(Cl)c(C(F)(F)F)c1	CAS:101-20-2	O=C(Nc1ccc(Cl)cc1)Nc1ccc(Cl)c(Cl)c1	[*:1]c1cc(NC(=O)Nc2ccc(Cl)cc2)ccc1Cl	[*:1]C(F)(F)F>>[*:1]Cl	0.13	no
454	CAS:87-29-6	Nc1ccccc1C(=O)OCC=Cc1ccccc1	CAS:133-18-6	Nc1ccccc1C(=O)OCCc1ccccc1	[*:1]c1ccccc1.[*:2]c1ccccc1N	[*:1]C=CCOC([*:2])=O>>[*:1]CCOC([*:2])=O	0.12	no
455	CAS:87-29-6	Nc1ccccc1C(=O)OCC=Cc1ccccc1	CAS:133-18-6	Nc1ccccc1C(=O)OCCc1ccccc1	[*:2]OC(=O)c1ccccc1N.[*:1]c1ccccc1	[*:1]C=CC[*:2]>>[*:1]CC[*:2]	0.12	no
456	CAS:102-09-0	O=C(Oc1ccccc1)Oc1ccccc1	CAS:104-66-5	c1ccc(OCCOc2ccccc2)cc1	[*:1]c1ccccc1.[*:2]c1ccccc1	[*:1]OC(=O)O[*:2]>>[*:1]OCCO[*:2]	0.12	no
457	CAS:86-29-3	N#CC(c1ccccc1)c1ccccc1	CAS:84-15-1	c1ccc(-c2ccccc2-c2ccccc2)cc1	[*:1]c1ccccc1.[*:2]c1ccccc1	[*:1]C([*:2])C#N>>[*:1]c1ccccc1[*:2]	0.12	no
458	CAS:778-22-3	CC(C)(c1ccccc1)c1ccccc1	CAS:84-15-1	c1ccc(-c2ccccc2-c2ccccc2)cc1	[*:1]c1ccccc1.[*:2]c1ccccc1	[*:1]C([*:2])(C)C>>[*:1]c1ccccc1[*:2]	0.12	no
459	CAS:133-18-6	Nc1ccccc1C(=O)OCCc1ccccc1	CAS:94-47-3	O=C(OCCc1ccccc1)c1ccccc1	[*:1]c1ccccc1C(=O)OCCc1ccccc1	[*:1]N>>[*:1][H]	0.12	no
460	CAS:5153-67-3	O=[N+]([O-])/C=C/c1ccccc1	CAS:102-96-5	O=[N+]([O-])C=Cc1ccccc1	[*:1][N+](=O)[O-].[*:2]c1ccccc1	[*:1]/C=C\[*:2]>>[*:1]C=C[*:2]	0.12	no
461	CAS:102-16-9	O=C(Cc1ccccc1)OCc1ccccc1	CAS:102-09-0	O=C(Oc1ccccc1)Oc1ccccc1	[*:1]c1ccccc1.[*:2]c1ccccc1	[*:1]COC(=O)C[*:2]>>[*:1]OC(=O)O[*:2]	0.12	no
462	CAS:103-41-3	O=C(C=Cc1ccccc1)OCc1ccccc1	CAS:102-09-0	O=C(Oc1ccccc1)Oc1ccccc1	[*:1]c1ccccc1.[*:2]c1ccccc1	[*:1]C=CC(=O)OC[*:2]>>[*:1]OC(=O)O[*:2]	0.12	no
463	CAS:94-47-3	O=C(OCCc1ccccc1)c1ccccc1	CAS:92-06-8	c1ccc(-c2cccc(-c3ccccc3)c2)cc1	[*:1]c1ccccc1.[*:2]c1ccccc1	[*:1]CCOC([*:2])=O>>[*:1]c1cccc([*:2])c1	0.11	no
464	CAS:451-40-1	O=C(Cc1ccccc1)c1ccccc1	CAS:84-15-1	c1ccc(-c2ccccc2-c2ccccc2)cc1	[*:1]c1ccccc1.[*:2]c1ccccc1	[*:1]CC([*:2])=O>>[*:1]c1ccccc1[*:2]	0.11	no
465	CAS:20830-75-5	C[CH]1O[CH](O[CH]2[CH](O)C[CH](O[CH]3[CH](O)C[CH](O[CH]4CC[C]5(C)[CH](CC[CH]6[CH]5C[CH](O)[C]5(C)[CH](C7=CC(=O)OC7)CC[C]65O)C4)O[CH]3C)O[CH]2C)C[CH](O)[CH]1O	CAS:71-63-6	C[CH]1O[CH](O[CH]2[CH](O)C[CH](O[CH]3[CH](O)C[CH](O[CH]4CC[C]5(C)[CH](CC[CH]6[CH]5CC[C]5(C)[CH](C7=CC(=O)OC7)CC[C]65O)C4)O[CH]3C)O[CH]2C)C[CH](O)[CH]1O	[*:1]C1CC2C(CCC3CC(OC4CC(O)C(OC5CC(O)C(OC6CC(O)C(O)C(C)O6)C(C)O5)C(C)O4)CCC32C)C2(O)CCC(C3=CC(=O)OC3)C12C	[*:1]O>>[*:1][H]	0.11	no
466	CAS:133-06-2	O=C1C2CC=CCC2C(=O)N1SC(Cl)(Cl)Cl	CAS:2425-06-1	O=C1C2CC=CCC2C(=O)N1SC(Cl)(Cl)C(Cl)Cl	[*:1]Cl.[*:2]SN1C(=O)C2CC=CCC2C1=O	[*:1]C([*:2])(Cl)Cl>>[*:1]C(Cl)C([*:2])(Cl)Cl	0.11	no
467	CAS:2425-06-1	O=C1C2CC=CCC2C(=O)N1SC(Cl)(Cl)C(Cl)Cl	CAS:133-06-2	O=C1C2CC=CCC2C(=O)N1SC(Cl)(Cl)Cl	[*:1]Cl.[*:2]SN1C(=O)C2CC=CCC2C1=O	[*:1]C([*:2])(Cl)C(Cl)Cl>>[*:1]C([*:2])(Cl)Cl	0.11	no
468	CAS:133-06-2	O=C1C2CC=CCC2C(=O)N1SC(Cl)(Cl)Cl	CAS:2425-06-1	O=C1C2CC=CCC2C(=O)N1SC(Cl)(Cl)C(Cl)Cl	[*:1]Cl.[*:2]Cl.[*:3]SN1C(=O)C2CC=CCC2C1=O	[*:1]C([*:2])([*:3])Cl>>[*:1][C@H](Cl)C([*:2])([*:3])Cl	0.11	no
469	CAS:2425-06-1	O=C1C2CC=CCC2C(=O)N1SC(Cl)(Cl)C(Cl)Cl	CAS:133-06-2	O=C1C2CC=CCC2C(=O)N1SC(Cl)(Cl)Cl	[*:1]C(Cl)(Cl)SN1C(=O)C2CC=CCC2C1=O	[*:1]C(Cl)Cl>>[*:1]Cl	0.11	no
470	CAS:2425-06-1	O=C1C2CC=CCC2C(=O)N1SC(Cl)(Cl)C(Cl)Cl	CAS:133-06-2	O=C1C2CC=CCC2C(=O)N1SC(Cl)(Cl)Cl	[*:1]SN1C(=O)C2CC=CCC2C1=O	[*:1]C(Cl)(Cl)C(Cl)Cl>>[*:1]C(Cl)(Cl)Cl	0.11	no
471	CAS:133-06-2	O=C1C2CC=CCC2C(=O)N1SC(Cl)(Cl)Cl	CAS:2425-06-1	O=C1C2CC=CCC2C(=O)N1SC(Cl)(Cl)C(Cl)Cl	[*:1]Cl.[*:2]SN1C(=O)C2CC=CCC2C1=O	[*:1]C([*:2])(Cl)Cl>>[*:1][C@H](Cl)C([*:2])(Cl)Cl	0.11	no
472	CAS:133-06-2	O=C1C2CC=CCC2C(=O)N1SC(Cl)(Cl)Cl	CAS:2425-06-1	O=C1C2CC=CCC2C(=O)N1SC(Cl)(Cl)C(Cl)Cl	[*:1]Cl.[*:2]SN1C(=O)C2CC=CCC2C1=O	[*:1]C([*:2])(Cl)Cl>>[*:1][C@@H](Cl)C([*:2])(Cl)Cl	0.11	no
473	CAS:2425-06-1	O=C1C2CC=CCC2C(=O)N1SC(Cl)(Cl)C(Cl)Cl	CAS:133-06-2	O=C1C2CC=CCC2C(=O)N1SC(Cl)(Cl)Cl	[*:1]Cl.[*:2]Cl.[*:3]SN1C(=O)C2CC=CCC2C1=O	[*:1]C([*:2])([*:3])C(Cl)Cl>>[*:1]C([*:2])([*:3])Cl	0.11	no
474	CAS:133-06-2	O=C1C2CC=CCC2C(=O)N1SC(Cl)(Cl)Cl	CAS:2425-06-1	O=C1C2CC=CCC2C(=O)N1SC(Cl)(Cl)C(Cl)Cl	[*:1]Cl.[*:2]Cl.[*:3]SN1C(=O)C2CC=CCC2C1=O	[*:1]C([*:2])([*:3])Cl>>[*:1][C@@H](Cl)C([*:2])([*:3])Cl	0.11	no
475	CAS:133-06-2	O=C1C2CC=CCC2C(=O)N1SC(Cl)(Cl)Cl	CAS:2425-06-1	O=C1C2CC=CCC2C(=O)N1SC(Cl)(Cl)C(Cl)Cl	[*:1]Cl.[*:2]Cl.[*:3]SN1C(=O)C2CC=CCC2C1=O	[*:1]C([*:2])([*:3])Cl>>[*:1]C([*:2])C([*:3])(Cl)Cl	0.11	no
476	CAS:133-06-2	O=C1C2CC=CCC2C(=O)N1SC(Cl)(Cl)Cl	CAS:2425-06-1	O=C1C2CC=CCC2C(=O)N1SC(Cl)(Cl)C(Cl)Cl	[*:1]Cl.[*:2]Cl.[*:3]SN1C(=O)C2CC=CCC2C1=O	[*:1]C([*:2])([*:3])Cl>>[*:1]C(Cl)C([*:2])([*:3])Cl	0.11	no
477	CAS:66246-88-6	CCCC(Cn1cncn1)c1ccc(Cl)cc1Cl	CAS:116255-48-2	Clc1ccc(C2(Cn3cncn3)CC(Br)CO2)c(Cl)c1	[*:1]Cn1cncn1.[*:2]c1ccc(Cl)cc1Cl	[*:1]C([*:2])CCC>>[*:1]C1([*:2])CC(Br)CO1	0.11	no
478	CAS:538-75-0	C(=NC1CCCCC1)=NC1CCCCC1	CAS:1212-29-9	S=C(NC1CCCCC1)NC1CCCCC1	[*:1]C1CCCCC1.[*:2]C1CCCCC1	[*:1]N=C=N[*:2]>>[*:1]NC(=S)N[*:2]	0.11	no
479	CAS:321-60-8	Fc1ccccc1-c1ccccc1	CAS:84-15-1	c1ccc(-c2ccccc2-c2ccccc2)cc1	[*:1]c1ccccc1-c1ccccc1	[*:1]F>>[*:1]c1ccccc1	0.11	no
480	CAS:103-29-7	c1ccc(CCc2ccccc2)cc1	CAS:102-20-5	O=C(Cc1ccccc1)OCCc1ccccc1	[*:1]c1ccccc1.[*:2]c1ccccc1	[*:1]CC[*:2]>>[*:1]CCOC(=O)C[*:2]	0.11	no
481	CAS:645-49-8	C(=C\c1ccccc1)\c1ccccc1	CAS:92-06-8	c1ccc(-c2cccc(-c3ccccc3)c2)cc1	[*:1]c1ccccc1.[*:2]c1ccccc1	[*:1]/C=C\[*:2]>>[*:1]c1cccc([*:2])c1	0.1	no
482	CAS:92-59-1	CCN(Cc1ccccc1)c1ccccc1	CAS:622-20-8	c1ccc(SCCSc2ccccc2)cc1	[*:1]c1ccccc1.[*:2]c1ccccc1	[*:1]CN([*:2])CC>>[*:1]SCCS[*:2]	0.1	no
483	CAS:115-32-2	OC(c1ccc(Cl)cc1)(c1ccc(Cl)cc1)C(Cl)(Cl)Cl	CAS:90-98-2	O=C(c1ccc(Cl)cc1)c1ccc(Cl)cc1	[*:1]c1ccc(Cl)cc1.[*:2]c1ccc(Cl)cc1	[*:1]C([*:2])(O)C(Cl)(Cl)Cl>>[*:1]C([*:2])=O	0.1	no
484	CAS:83657-24-3	CC(C)(C)C(O)/C(=C\c1ccc(Cl)cc1Cl)n1cncn1	CAS:79983-71-4	CCCCC(O)(Cn1cncn1)c1ccc(Cl)cc1Cl	[*:3]O.[*:1]c1ccc(Cl)cc1Cl.[*:2]n1cncn1	[*:1]/C=C(/[*:2])C([*:3])C(C)(C)C>>[*:2]CC([*:1])([*:3])CCCC	0.1	no
485	CAS:55719-85-2	C/C=C(\C)C(=O)OCCc1ccccc1	CAS:6290-37-5	CCCCCC(=O)OCCc1ccccc1	[*:1]C(=O)OCCc1ccccc1	[*:1]/C(C)=C/C>>[*:1]CCCCC	0.1	no
486	CAS:103-41-3	O=C(C=Cc1ccccc1)OCc1ccccc1	CAS:103-53-7	O=C(C=Cc1ccccc1)OCCc1ccccc1	[*:1]OC(=O)C=Cc1ccccc1.[*:2]c1ccccc1	[*:1]C[*:2]>>[*:1]CC[*:2]	0.09	no
487	CAS:103-53-7	O=C(C=Cc1ccccc1)OCCc1ccccc1	CAS:103-41-3	O=C(C=Cc1ccccc1)OCc1ccccc1	[*:2]C=Cc1ccccc1.[*:1]c1ccccc1	[*:1]CCOC([*:2])=O>>[*:1]COC([*:2])=O	0.09	no
488	CAS:321-60-8	Fc1ccccc1-c1ccccc1	CAS:86-00-0	O=[N+]([O-])c1ccccc1-c1ccccc1	[*:1]c1ccccc1-c1ccccc1	[*:1]F>>[*:1][N+](=O)[O-]	0.09	no
489	CAS:100-22-1	CN(C)c1ccc(N(C)C)cc1	CAS:138-89-6	CN(C)c1ccc(N=O)cc1	[*:1]c1ccc(N(C)C)cc1	[*:1]N(C)C>>[*:1]N=O	0.09	no
490	CAS:451-40-1	O=C(Cc1ccccc1)c1ccccc1	CAS:94-47-3	O=C(OCCc1ccccc1)c1ccccc1	[*:1]c1ccccc1.[*:2]c1ccccc1	[*:1]CC([*:2])=O>>[*:1]CCOC([*:2])=O	0.09	no
491	CAS:92-06-8	c1ccc(-c2cccc(-c3ccccc3)c2)cc1	CAS:84-15-1	c1ccc(-c2ccccc2-c2ccccc2)cc1	[*:1]c1ccccc1.[*:2]c1ccccc1	[*:1]c1cccc([*:2])c1>>[*:1]c1ccccc1[*:2]	0.09	no
492	CAS:1162-06-7	CC(=O)O[Pb](c1ccccc1)(c1ccccc1)c1ccccc1	CAS:379-52-2	F[Sn](c1ccccc1)(c1ccccc1)c1ccccc1	[*:1]c1ccccc1.[*:2]c1ccccc1.[*:3]c1ccccc1	[*:1][Pb]([*:2])([*:3])OC(C)=O>>[*:1][Sn]([*:2])([*:3])F	0.09	no
493	CAS:60-11-7	CN(C)c1ccc(N=Nc2ccccc2)cc1	CAS:103-33-3	c1ccc(N=Nc2ccccc2)cc1	[*:1]c1ccc(N=Nc2ccccc2)cc1	[*:1]N(C)C>>[*:1][H]	0.09	no
494	CAS:69-23-8	OCCN1CCN(CCCN2c3ccccc3Sc3ccc(C(F)(F)F)cc32)CC1	CAS:58-39-9	OCCN1CCN(CCCN2c3ccccc3Sc3ccc(Cl)cc32)CC1	[*:1]c1ccc2c(c1)N(CCCN1CCN(CCO)CC1)c1ccccc1S2	[*:1]C(F)(F)F>>[*:1]Cl	0.08	no
495	CAS:90-41-5	Nc1ccccc1-c1ccccc1	CAS:86-00-0	O=[N+]([O-])c1ccccc1-c1ccccc1	[*:1]c1ccccc1-c1ccccc1	[*:1]N>>[*:1][N+](=O)[O-]	0.08	no
496	CAS:778-22-3	CC(C)(c1ccccc1)c1ccccc1	CAS:94-47-3	O=C(OCCc1ccccc1)c1ccccc1	[*:1]c1ccccc1.[*:2]c1ccccc1	[*:1]C([*:2])(C)C>>[*:1]CCOC([*:2])=O	0.08	no
497	CAS:86-29-3	N#CC(c1ccccc1)c1ccccc1	CAS:94-47-3	O=C(OCCc1ccccc1)c1ccccc1	[*:1]c1ccccc1.[*:2]c1ccccc1	[*:1]C([*:2])C#N>>[*:1]CCOC([*:2])=O	0.08	no
498	CAS:103-33-3	c1ccc(N=Nc2ccccc2)cc1	CAS:104-66-5	c1ccc(OCCOc2ccccc2)cc1	[*:1]c1ccccc1.[*:2]c1ccccc1	[*:1]N=N[*:2]>>[*:1]OCCO[*:2]	0.08	no
499	CAS:115-32-2	OC(c1ccc(Cl)cc1)(c1ccc(Cl)cc1)C(Cl)(Cl)Cl	CAS:72-54-8	Clc1ccc(C(c2ccc(Cl)cc2)C(Cl)Cl)cc1	[*:3]Cl.[*:1]c1ccc(Cl)cc1.[*:2]c1ccc(Cl)cc1	[*:1]C([*:2])(O)C([*:3])(Cl)Cl>>[*:1]C([*:2])[C@@H]([*:3])Cl	0.08	no
500	CAS:115-32-2	OC(c1ccc(Cl)cc1)(c1ccc(Cl)cc1)C(Cl)(Cl)Cl	CAS:72-54-8	Clc1ccc(C(c2ccc(Cl)cc2)C(Cl)Cl)cc1	[*:3]Cl.[*:1]c1ccc(Cl)cc1.[*:2]c1ccc(Cl)cc1	[*:1]C([*:2])(O)C([*:3])(Cl)Cl>>[*:1]C([*:2])C([*:3])Cl	0.08	no
501	CAS:115-32-2	OC(c1ccc(Cl)cc1)(c1ccc(Cl)cc1)C(Cl)(Cl)Cl	CAS:72-54-8	Clc1ccc(C(c2ccc(Cl)cc2)C(Cl)Cl)cc1	[*:1]c1ccc(Cl)cc1.[*:2]c1ccc(Cl)cc1	[*:1]C([*:2])(O)C(Cl)(Cl)Cl>>[*:1]C([*:2])C(Cl)Cl	0.08	no
502	CAS:115-32-2	OC(c1ccc(Cl)cc1)(c1ccc(Cl)cc1)C(Cl)(Cl)Cl	CAS:72-54-8	Clc1ccc(C(c2ccc(Cl)cc2)C(Cl)Cl)cc1	[*:3]Cl.[*:1]c1ccc(Cl)cc1.[*:2]c1ccc(Cl)cc1	[*:1]C([*:2])(O)C([*:3])(Cl)Cl>>[*:1]C([*:2])[C@H]([*:3])Cl	0.08	no
503	CAS:645-49-8	C(=C\c1ccccc1)\c1ccccc1	CAS:451-40-1	O=C(Cc1ccccc1)c1ccccc1	[*:1]c1ccccc1.[*:2]c1ccccc1	[*:1]/C=C\[*:2]>>[*:1]CC([*:2])=O	0.08	no
504	CAS:94-47-3	O=C(OCCc1ccccc1)c1ccccc1	CAS:103-33-3	c1ccc(N=Nc2ccccc2)cc1	[*:1]c1ccccc1.[*:2]c1ccccc1	[*:1]CCOC([*:2])=O>>[*:1]N=N[*:2]	0.08	no
505	CAS:139-66-2	c1ccc(Sc2ccccc2)cc1	CAS:622-20-8	c1ccc(SCCSc2ccccc2)cc1	[*:1]c1ccccc1.[*:2]c1ccccc1	[*:1]S[*:2]>>[*:1]SCCS[*:2]	0.08	no
506	CAS:102-09-0	O=C(Oc1ccccc1)Oc1ccccc1	CAS:84-15-1	c1ccc(-c2ccccc2-c2ccccc2)cc1	[*:1]c1ccccc1.[*:2]c1ccccc1	[*:1]OC(=O)O[*:2]>>[*:1]c1ccccc1[*:2]	0.08	no
507	CAS:86-29-3	N#CC(c1ccccc1)c1ccccc1	CAS:104-66-5	c1ccc(OCCOc2ccccc2)cc1	[*:1]c1ccccc1.[*:2]c1ccccc1	[*:1]C([*:2])C#N>>[*:1]OCCO[*:2]	0.07	no
508	CAS:778-22-3	CC(C)(c1ccccc1)c1ccccc1	CAS:104-66-5	c1ccc(OCCOc2ccccc2)cc1	[*:1]c1ccccc1.[*:2]c1ccccc1	[*:1]C([*:2])(C)C>>[*:1]OCCO[*:2]	0.07	no
509	CAS:645-49-8	C(=C\c1ccccc1)\c1ccccc1	CAS:778-22-3	CC(C)(c1ccccc1)c1ccccc1	[*:1]c1ccccc1.[*:2]c1ccccc1	[*:1]/C=C\[*:2]>>[*:1]C([*:2])(C)C	0.07	no
510	CAS:79983-71-4	CCCCC(O)(Cn1cncn1)c1ccc(Cl)cc1Cl	CAS:116255-48-2	Clc1ccc(C2(Cn3cncn3)CC(Br)CO2)c(Cl)c1	[*:1]Cn1cncn1.[*:2]c1ccc(Cl)cc1Cl	[*:1]C([*:2])(O)CCCC>>[*:1]C1([*:2])CC(Br)CO1	0.07	no
[truncated: 80 more rows]

## Sheet: Table S9
Table S9: List of 38 chemical pairs (which were common to both TSHR agonist and TSHR antagonist datasets, and have Tanimoto coefficient based similarity of > 0.35) and their mechanism of action (MOA) based classification. For each chemical pair, the table provides the chemical identifiers, computed chemical similarity by using the Tanimoto coefficient between the ECFP4 fingerprints (value shown h…
[truncated: 39 more rows]
